# Supplementary material
Source: publisher figshare collection journal article supplement (https://acs.figshare.com/ndownloader/files/5768265)
Supplement: Supplementary file 1 [file 5768265]

# ja994162a.cif
  
data_fe10 
_publ_requested_journal 'test' 
_audit_creation_method            SHELXL-97 
_chemical_name_systematic 
; 
 ? 
; 
_chemical_name_common             ? 
_chemical_melting_point           ? 
_chemical_formula_moiety          ? 
_chemical_formula_sum 
 'C45 H69 Fe3 N3 O13' 
_chemical_formula_weight          1027.58 
  
loop_ 
 _atom_type_symbol 
 _atom_type_description 
 _atom_type_scat_dispersion_real 
 _atom_type_scat_dispersion_imag 
 _atom_type_scat_source 
 'C'  'C'   0.0015   0.0009 
 'International Tables Vol C Tables 4.2.6.8 and 6.1.1.4' 
 'H'  'H'   0.0000   0.0000 
 'International Tables Vol C Tables 4.2.6.8 and 6.1.1.4' 
 'N'  'N'   0.0030   0.0019 
 'International Tables Vol C Tables 4.2.6.8 and 6.1.1.4' 
 'O'  'O'   0.0056   0.0036 
 'International Tables Vol C Tables 4.2.6.8 and 6.1.1.4' 
 'Fe'  'Fe'   0.2886   0.5448 
 'International Tables Vol C Tables 4.2.6.8 and 6.1.1.4' 
  
_symmetry_cell_setting            monoclinic 
_symmetry_space_group_name_H-M    P2(1) 
  
loop_ 
 _symmetry_equiv_pos_as_xyz 
 'x, y, z' 
 '-x, y+1/2, -z' 
  
_cell_length_a                    11.574(3) 
_cell_length_b                    19.732(4) 
_cell_length_c                    11.853(3) 
_cell_angle_alpha                 90.00 
_cell_angle_beta                  106.5830(10) 
_cell_angle_gamma                 90.00 
_cell_volume                      2594.4(11) 
_cell_formula_units_Z             2 
_cell_measurement_temperature    10(2) 
_cell_measurement_reflns_used     25
_cell_measurement_theta_min       20
_cell_measurement_theta_max       24.3
  
_exptl_crystal_description        'irregular block' 
_exptl_crystal_colour             'red brown'
_exptl_crystal_size_max           0.35 
_exptl_crystal_size_mid           0.24 
_exptl_crystal_size_min           0.24 
_exptl_crystal_density_meas       ? 
_exptl_crystal_density_diffrn     1.315 
_exptl_crystal_density_method     'not measured' 
_exptl_crystal_F_000              1084 
_exptl_absorpt_coefficient_mu     0.466 
_exptl_absorpt_correction_type    integration 
_exptl_absorpt_correction_T_min   0.893
_exptl_absorpt_correction_T_max   0.911
_exptl_absorpt_process_details    'ABSORB (?)'
  
_exptl_special_details 
; 
 ? 
; 
  
_diffrn_ambient_temperature      10(2) 
_diffrn_radiation_wavelength      0.56080 
_diffrn_radiation_type            AgK\a 
_diffrn_radiation_source          'fine-focus sealed tube' 
_diffrn_radiation_monochromator   graphite 
_diffrn_measurement_device_type   'Huber' 
_diffrn_measurement_method        '/w-2/q scans'
_diffrn_detector_area_resol_mean  ? 
_diffrn_standards_number          ?
_diffrn_standards_interval_count  ? 
_diffrn_standards_interval_time   ? 
_diffrn_standards_decay_%         ? 
_diffrn_reflns_number             5996 
_diffrn_reflns_av_R_equivalents   0.0500 
_diffrn_reflns_av_sigmaI/netI     0.0612 
_diffrn_reflns_limit_h_min        -14 
_diffrn_reflns_limit_h_max        13 
_diffrn_reflns_limit_k_min        -12 
_diffrn_reflns_limit_k_max        25 
_diffrn_reflns_limit_l_min        0 
_diffrn_reflns_limit_l_max        15 
_diffrn_reflns_theta_min          1.41 
_diffrn_reflns_theta_max          21.52 
_reflns_number_total              5775 
_reflns_number_gt                 5276 
_reflns_threshold_expression      >2sigma(I) 
  
_computing_data_collection        'MAD (Allibon)'
_computing_cell_refinement        'MAD (Allibon)'
_computing_data_reduction         'KRYSTAL (Hazell), SORTAV (Blessing)'
_computing_structure_solution     'SHELXS-97 (Sheldrick, 1990)' 
_computing_structure_refinement   'SHELXL-97 (Sheldrick, 1997)' 
_computing_molecular_graphics     ? 
_computing_publication_material   ? 
  
_refine_special_details 
; 
 Refinement of F^2^ against ALL reflections.  The weighted R-factor wR and 
 goodness of fit S are based on F^2^, conventional R-factors R are based 
 on F, with F set to zero for negative F^2^. The threshold expression of 
 F^2^ > 2sigma(F^2^) is used only for calculating R-factors(gt) etc. and is 
 not relevant to the choice of reflections for refinement.  R-factors based 
 on F^2^ are statistically about twice as large as those based on F, and R- 
 factors based on ALL data will be even larger. 
; 
  
_refine_ls_structure_factor_coef  Fsqd 
_refine_ls_matrix_type            full 
_refine_ls_weighting_scheme       calc 
_refine_ls_weighting_details 
 'calc w=1/[\s^2^(Fo^2^)+(0.0000P)^2^+10.0000P] where P=(Fo^2^+2Fc^2^)/3' 
_atom_sites_solution_primary      direct 
_atom_sites_solution_secondary    difmap 
_atom_sites_solution_hydrogens    geom 
_refine_ls_hydrogen_treatment     noref
_refine_ls_extinction_method      none 
_refine_ls_extinction_coef        ? 
_refine_ls_abs_structure_details 
 'Flack H D (1983), Acta Cryst. A39, 876-881' 
_refine_ls_abs_structure_Flack    -0.06(5) 
_refine_ls_number_reflns          5775 
_refine_ls_number_parameters      577 
_refine_ls_number_restraints      1 
_refine_ls_R_factor_all           0.0679 
_refine_ls_R_factor_gt            0.0608 
_refine_ls_wR_factor_ref          0.1488 
_refine_ls_wR_factor_gt           0.1465 
_refine_ls_goodness_of_fit_ref    1.362 
_refine_ls_restrained_S_all       1.361 
_refine_ls_shift/su_max           0.005 
_refine_ls_shift/su_mean          0.000 
  
loop_ 
 _atom_site_label 
 _atom_site_type_symbol 
 _atom_site_fract_x 
 _atom_site_fract_y 
 _atom_site_fract_z 
 _atom_site_U_iso_or_equiv 
 _atom_site_adp_type 
 _atom_site_occupancy 
 _atom_site_symmetry_multiplicity 
 _atom_site_calc_flag 
 _atom_site_refinement_flags 
 _atom_site_disorder_assembly 
 _atom_site_disorder_group 
Fe1 Fe 0.89771(11) 0.17590(6) 0.26723(10) 0.0150(3) Uani 1 1 d . . . 
Fe2 Fe 0.75721(11) 0.03377(6) 0.29821(10) 0.0143(3) Uani 1 1 d . . . 
Fe3 Fe 0.59560(11) 0.16425(6) 0.18409(10) 0.0151(3) Uani 1 1 d . . . 
O1 O 0.7433(5) 0.1217(3) 0.2485(5) 0.0154(13) Uani 1 1 d . . . 
O11 O 0.9883(5) 0.1338(3) 0.4281(5) 0.0181(13) Uani 1 1 d . . . 
O12 O 0.8698(5) 0.0511(3) 0.4622(5) 0.0180(13) Uani 1 1 d . . . 
O22 O 0.8978(5) 0.0069(3) 0.2410(5) 0.0179(13) Uani 1 1 d . . . 
O21 O 0.9734(5) 0.0995(3) 0.1808(5) 0.0209(14) Uani 1 1 d . . . 
O31 O 0.6146(5) 0.0374(3) 0.3661(5) 0.0184(13) Uani 1 1 d . . . 
O32 O 0.5233(5) 0.1391(3) 0.3193(5) 0.0168(13) Uani 1 1 d . . . 
O41 O 0.6465(5) -0.0054(3) 0.1434(5) 0.0187(14) Uani 1 1 d . . . 
O42 O 0.5136(5) 0.0803(3) 0.0961(5) 0.0184(13) Uani 1 1 d . . . 
O51 O 0.6324(5) 0.1923(3) 0.0341(5) 0.0180(13) Uani 1 1 d . . . 
O52 O 0.8264(5) 0.2232(3) 0.1053(5) 0.0153(13) Uani 1 1 d . . . 
O61 O 0.6349(5) 0.2553(3) 0.2622(5) 0.0162(13) Uani 1 1 d . . . 
O62 O 0.8326(5) 0.2534(3) 0.3581(5) 0.0163(13) Uani 1 1 d . . . 
N101 N 1.0526(6) 0.2419(4) 0.2739(6) 0.0159(16) Uani 1 1 d . . . 
N201 N 0.7653(7) -0.0742(4) 0.3569(6) 0.0194(17) Uani 1 1 d . . . 
N301 N 0.4166(7) 0.2096(4) 0.0909(6) 0.0181(16) Uani 1 1 d . . . 
C10 C 0.9573(7) 0.0919(5) 0.4935(7) 0.0151(17) Uani 1 1 d . . . 
C13 C 1.0276(7) 0.0916(5) 0.6261(7) 0.0169(18) Uani 1 1 d . . . 
C14 C 1.1644(8) 0.0926(5) 0.6374(8) 0.027(2) Uani 1 1 d . . . 
H14A H 1.1828 0.1316 0.5972 0.041 Uiso 1 1 calc R . . 
H14B H 1.1857 0.0522 0.6029 0.041 Uiso 1 1 calc R . . 
H14C H 1.2093 0.0946 0.7191 0.041 Uiso 1 1 calc R . . 
C15 C 0.9946(8) 0.1570(5) 0.6775(7) 0.023(2) Uani 1 1 d . . . 
H15A H 1.0141 0.1950 0.6359 0.034 Uiso 1 1 calc R . . 
H15B H 1.0390 0.1600 0.7592 0.034 Uiso 1 1 calc R . . 
H15C H 0.9098 0.1572 0.6699 0.034 Uiso 1 1 calc R . . 
C16 C 0.9981(8) 0.0303(5) 0.6894(8) 0.027(2) Uani 1 1 d . . . 
H16A H 1.0197 -0.0102 0.6552 0.040 Uiso 1 1 calc R . . 
H16B H 0.9133 0.0297 0.6819 0.040 Uiso 1 1 calc R . . 
H16C H 1.0425 0.0324 0.7712 0.040 Uiso 1 1 calc R . . 
C20 C 0.9609(7) 0.0372(5) 0.1862(7) 0.0165(17) Uani 1 1 d . . . 
C23 C 1.0262(8) -0.0097(5) 0.1212(8) 0.020(2) Uani 1 1 d . . . 
C24 C 0.9316(9) -0.0515(5) 0.0304(9) 0.030(2) Uani 1 1 d . . . 
H24A H 0.8815 -0.0753 0.0693 0.046 Uiso 1 1 calc R . . 
H24B H 0.9715 -0.0835 -0.0067 0.046 Uiso 1 1 calc R . . 
H24C H 0.8826 -0.0217 -0.0280 0.046 Uiso 1 1 calc R . . 
C25 C 1.1042(9) 0.0273(5) 0.0599(9) 0.033(2) Uani 1 1 d . . . 
H25A H 1.1424 -0.0048 0.0212 0.049 Uiso 1 1 calc R . . 
H25B H 1.1647 0.0526 0.1165 0.049 Uiso 1 1 calc R . . 
H25C H 1.0554 0.0577 0.0027 0.049 Uiso 1 1 calc R . . 
C26 C 1.1039(9) -0.0595(5) 0.2131(8) 0.026(2) Uani 1 1 d . . . 
H26A H 1.0534 -0.0830 0.2520 0.039 Uiso 1 1 calc R . . 
H26B H 1.1648 -0.0347 0.2701 0.039 Uiso 1 1 calc R . . 
H26C H 1.1415 -0.0917 0.1741 0.039 Uiso 1 1 calc R . . 
C30 C 0.5481(7) 0.0850(4) 0.3823(7) 0.0164(18) Uani 1 1 d . . . 
C33 C 0.4881(8) 0.0762(4) 0.4801(7) 0.0168(19) Uani 1 1 d . . . 
C34 C 0.5611(8) 0.0277(5) 0.5737(8) 0.026(2) Uani 1 1 d . . . 
H34A H 0.5736 -0.0140 0.5372 0.039 Uiso 1 1 calc R . . 
H34B H 0.5180 0.0188 0.6303 0.039 Uiso 1 1 calc R . . 
H34C H 0.6376 0.0479 0.6125 0.039 Uiso 1 1 calc R . . 
C35 C 0.3654(8) 0.0414(5) 0.4192(8) 0.027(2) Uani 1 1 d . . . 
H35A H 0.3796 -0.0008 0.3854 0.040 Uiso 1 1 calc R . . 
H35B H 0.3182 0.0705 0.3584 0.040 Uiso 1 1 calc R . . 
H35C H 0.3226 0.0333 0.4764 0.040 Uiso 1 1 calc R . . 
C36 C 0.4660(8) 0.1428(5) 0.5335(8) 0.024(2) Uani 1 1 d . . . 
H36A H 0.4200 0.1722 0.4726 0.035 Uiso 1 1 calc R . . 
H36B H 0.5418 0.1638 0.5720 0.035 Uiso 1 1 calc R . . 
H36C H 0.4222 0.1347 0.5898 0.035 Uiso 1 1 calc R . . 
C40 C 0.5550(8) 0.0228(5) 0.0784(7) 0.0178(19) Uani 1 1 d . . . 
C43 C 0.4833(8) -0.0170(5) -0.0312(8) 0.022(2) Uani 1 1 d . . . 
C44 C 0.4260(8) -0.0769(5) 0.0122(9) 0.028(2) Uani 1 1 d . . . 
H44A H 0.3721 -0.0608 0.0546 0.041 Uiso 1 1 calc R . . 
H44B H 0.4878 -0.1042 0.0633 0.041 Uiso 1 1 calc R . . 
H44C H 0.3819 -0.1035 -0.0538 0.041 Uiso 1 1 calc R . . 
C45 C 0.3864(9) 0.0291(5) -0.1110(8) 0.033(2) Uani 1 1 d . . . 
H45A H 0.4247 0.0666 -0.1375 0.049 Uiso 1 1 calc R . . 
H45B H 0.3340 0.0458 -0.0675 0.049 Uiso 1 1 calc R . . 
H45C H 0.3403 0.0037 -0.1778 0.049 Uiso 1 1 calc R . . 
C46 C 0.5704(9) -0.0391(5) -0.0995(8) 0.030(2) Uani 1 1 d . . . 
H46A H 0.6046 0.0002 -0.1253 0.045 Uiso 1 1 calc R . . 
H46B H 0.5278 -0.0654 -0.1666 0.045 Uiso 1 1 calc R . . 
H46C H 0.6336 -0.0661 -0.0495 0.045 Uiso 1 1 calc R . . 
C50 C 0.7319(8) 0.2122(4) 0.0221(7) 0.0182(19) Uani 1 1 d . . . 
C53 C 0.7395(8) 0.2199(5) -0.1035(7) 0.0188(19) Uani 1 1 d . . . 
C54 C 0.7308(10) 0.1472(6) -0.1573(9) 0.036(3) Uani 1 1 d . . . 
H54A H 0.7978 0.1205 -0.1130 0.054 Uiso 1 1 calc R . . 
H54B H 0.7324 0.1501 -0.2377 0.054 Uiso 1 1 calc R . . 
H54C H 0.6568 0.1263 -0.1542 0.054 Uiso 1 1 calc R . . 
C55 C 0.8574(8) 0.2533(5) -0.1066(8) 0.025(2) Uani 1 1 d . . . 
H55A H 0.9241 0.2272 -0.0603 0.037 Uiso 1 1 calc R . . 
H55B H 0.8613 0.2983 -0.0750 0.037 Uiso 1 1 calc R . . 
H55C H 0.8610 0.2555 -0.1864 0.037 Uiso 1 1 calc R . . 
C56 C 0.6322(9) 0.2603(6) -0.1760(8) 0.035(3) Uani 1 1 d . . . 
H56A H 0.6374 0.2650 -0.2550 0.052 Uiso 1 1 calc R . . 
H56B H 0.6323 0.3043 -0.1416 0.052 Uiso 1 1 calc R . . 
H56C H 0.5590 0.2370 -0.1772 0.052 Uiso 1 1 calc R . . 
C60 C 0.7271(8) 0.2752(4) 0.3433(7) 0.0160(18) Uani 1 1 d . . . 
C63 C 0.7069(7) 0.3267(4) 0.4311(8) 0.0157(18) Uani 1 1 d . . . 
C64 C 0.7659(8) 0.3002(5) 0.5567(7) 0.021(2) Uani 1 1 d . . . 
H64A H 0.8499 0.2917 0.5668 0.031 Uiso 1 1 calc R . . 
H64B H 0.7271 0.2590 0.5687 0.031 Uiso 1 1 calc R . . 
H64C H 0.7575 0.3335 0.6129 0.031 Uiso 1 1 calc R . . 
C65 C 0.7700(8) 0.3924(4) 0.4108(8) 0.0189(19) Uani 1 1 d . . . 
H65A H 0.8539 0.3835 0.4210 0.028 Uiso 1 1 calc R . . 
H65B H 0.7620 0.4261 0.4665 0.028 Uiso 1 1 calc R . . 
H65C H 0.7335 0.4086 0.3323 0.028 Uiso 1 1 calc R . . 
C66 C 0.5740(8) 0.3401(5) 0.4152(8) 0.023(2) Uani 1 1 d . . . 
H66A H 0.5655 0.3728 0.4722 0.034 Uiso 1 1 calc R . . 
H66B H 0.5350 0.2987 0.4259 0.034 Uiso 1 1 calc R . . 
H66C H 0.5374 0.3573 0.3374 0.034 Uiso 1 1 calc R . . 
C102 C 1.1666(8) 0.2198(5) 0.2939(7) 0.021(2) Uani 1 1 d . . . 
H10A H 1.1815 0.1738 0.3077 0.025 Uiso 1 1 calc R . . 
C103 C 1.2637(8) 0.2619(5) 0.2950(8) 0.023(2) Uani 1 1 d . . . 
H10B H 1.3414 0.2446 0.3101 0.027 Uiso 1 1 calc R . . 
C104 C 1.2408(8) 0.3294(5) 0.2732(8) 0.026(2) Uani 1 1 d . . . 
H10C H 1.3035 0.3586 0.2717 0.031 Uiso 1 1 calc R . . 
C105 C 1.1273(8) 0.3541(5) 0.2537(7) 0.0193(19) Uani 1 1 d . . . 
H10D H 1.1112 0.3999 0.2393 0.023 Uiso 1 1 calc R . . 
C106 C 1.0348(8) 0.3087(5) 0.2558(8) 0.0191(19) Uani 1 1 d . . . 
H10E H 0.9573 0.3257 0.2442 0.023 Uiso 1 1 calc R . . 
C202 C 0.6646(8) -0.1112(4) 0.3419(8) 0.0181(19) Uani 1 1 d . . . 
H20A H 0.5906 -0.0907 0.3074 0.022 Uiso 1 1 calc R . . 
C203 C 0.6658(8) -0.1792(5) 0.3757(8) 0.0195(19) Uani 1 1 d . . . 
H20B H 0.5944 -0.2033 0.3640 0.023 Uiso 1 1 calc R . . 
C204 C 0.7776(9) -0.2098(5) 0.4276(8) 0.025(2) Uani 1 1 d . . . 
H20C H 0.7819 -0.2551 0.4500 0.030 Uiso 1 1 calc R . . 
C205 C 0.8805(8) -0.1719(4) 0.4447(8) 0.0184(19) Uani 1 1 d . . . 
H20D H 0.9554 -0.1910 0.4810 0.022 Uiso 1 1 calc R . . 
C206 C 0.8723(8) -0.1044(5) 0.4073(7) 0.0177(19) Uani 1 1 d . . . 
H20E H 0.9428 -0.0796 0.4174 0.021 Uiso 1 1 calc R . . 
C302 C 0.4097(8) 0.2678(5) 0.0330(8) 0.021(2) Uani 1 1 d . . . 
H30A H 0.4806 0.2922 0.0424 0.025 Uiso 1 1 calc R . . 
C303 C 0.3032(8) 0.2951(5) -0.0413(8) 0.025(2) Uani 1 1 d . . . 
H30B H 0.3031 0.3352 -0.0826 0.030 Uiso 1 1 calc R . . 
C304 C 0.1977(8) 0.2591(5) -0.0500(8) 0.0211(19) Uani 1 1 d . . . 
H30C H 0.1243 0.2753 -0.0971 0.025 Uiso 1 1 calc R . . 
C305 C 0.2021(8) 0.2002(5) 0.0104(8) 0.025(2) Uani 1 1 d . . . 
H30D H 0.1318 0.1762 0.0063 0.030 Uiso 1 1 calc R . . 
C306 C 0.3139(8) 0.1762(5) 0.0790(7) 0.0223(19) Uani 1 1 d . . . 
H30E H 0.3166 0.1351 0.1179 0.027 Uiso 1 1 calc R . . 
  
loop_ 
 _atom_site_aniso_label 
 _atom_site_aniso_U_11 
 _atom_site_aniso_U_22 
 _atom_site_aniso_U_33 
 _atom_site_aniso_U_23 
 _atom_site_aniso_U_13 
 _atom_site_aniso_U_12 
Fe1 0.0204(6) 0.0126(6) 0.0115(5) 0.0005(5) 0.0035(5) 0.0014(5) 
Fe2 0.0180(6) 0.0127(6) 0.0112(5) 0.0006(5) 0.0026(5) -0.0009(5) 
Fe3 0.0196(6) 0.0125(6) 0.0133(5) -0.0008(5) 0.0050(5) -0.0025(5) 
O1 0.019(3) 0.013(3) 0.014(3) 0.003(2) 0.006(2) 0.001(2) 
O11 0.021(3) 0.022(3) 0.011(3) 0.004(3) 0.004(2) -0.004(3) 
O12 0.017(3) 0.015(3) 0.019(3) -0.001(3) 0.000(2) -0.002(3) 
O22 0.021(3) 0.017(3) 0.016(3) -0.002(3) 0.006(3) 0.002(3) 
O21 0.024(3) 0.015(3) 0.023(3) -0.003(3) 0.005(3) -0.005(3) 
O31 0.018(3) 0.014(3) 0.026(3) 0.003(3) 0.012(3) -0.001(3) 
O32 0.014(3) 0.017(3) 0.019(3) 0.004(3) 0.005(2) 0.001(2) 
O41 0.016(3) 0.016(3) 0.023(3) -0.005(3) 0.003(3) 0.003(3) 
O42 0.021(3) 0.015(3) 0.017(3) -0.001(3) 0.001(3) 0.000(3) 
O51 0.011(3) 0.022(3) 0.019(3) 0.000(3) 0.000(2) -0.001(2) 
O52 0.016(3) 0.015(3) 0.011(3) 0.004(2) -0.003(2) -0.003(2) 
O61 0.018(3) 0.012(3) 0.017(3) 0.000(3) 0.003(3) -0.001(2) 
O62 0.012(3) 0.015(3) 0.020(3) 0.001(3) 0.001(2) 0.000(2) 
N101 0.019(4) 0.017(4) 0.011(3) 0.000(3) 0.002(3) -0.005(3) 
N201 0.029(4) 0.011(4) 0.020(4) 0.001(3) 0.010(3) -0.002(3) 
N301 0.022(4) 0.018(4) 0.015(4) -0.009(3) 0.007(3) -0.005(3) 
C10 0.016(4) 0.017(4) 0.015(4) -0.002(4) 0.008(3) 0.002(4) 
C13 0.017(4) 0.023(5) 0.007(4) 0.002(4) 0.000(3) 0.003(4) 
C14 0.032(5) 0.019(5) 0.028(5) 0.010(4) 0.003(4) -0.001(4) 
C15 0.026(5) 0.026(5) 0.015(4) 0.002(4) 0.003(4) 0.002(4) 
C16 0.035(5) 0.025(5) 0.022(4) -0.005(5) 0.010(4) -0.005(5) 
C20 0.013(4) 0.015(4) 0.016(4) 0.002(4) -0.006(3) -0.002(4) 
C23 0.021(5) 0.019(5) 0.019(4) -0.003(4) 0.002(4) 0.000(4) 
C24 0.036(6) 0.030(6) 0.029(5) -0.006(5) 0.016(5) 0.000(5) 
C25 0.041(6) 0.024(5) 0.037(6) 0.002(5) 0.016(5) 0.002(5) 
C26 0.025(5) 0.025(5) 0.026(5) -0.002(4) 0.006(4) 0.008(4) 
C30 0.016(4) 0.014(4) 0.017(4) -0.003(4) 0.000(3) -0.007(4) 
C33 0.024(5) 0.013(4) 0.014(4) -0.001(3) 0.007(4) -0.001(4) 
C34 0.033(5) 0.026(5) 0.022(4) 0.005(4) 0.011(4) 0.009(5) 
C35 0.028(5) 0.027(5) 0.030(5) -0.006(5) 0.016(4) -0.006(5) 
C36 0.024(5) 0.024(5) 0.024(5) 0.005(4) 0.007(4) 0.002(4) 
C40 0.022(5) 0.020(5) 0.014(4) 0.001(4) 0.007(4) 0.000(4) 
C43 0.021(5) 0.019(5) 0.022(5) -0.007(4) -0.002(4) 0.011(4) 
C44 0.020(5) 0.028(6) 0.029(5) -0.013(5) -0.003(4) 0.001(4) 
C45 0.042(6) 0.020(5) 0.026(5) -0.008(5) -0.008(4) 0.000(5) 
C46 0.041(6) 0.024(5) 0.020(5) -0.012(4) 0.001(5) 0.008(5) 
C50 0.031(5) 0.011(4) 0.017(4) 0.005(3) 0.014(4) 0.005(4) 
C53 0.018(5) 0.026(5) 0.010(4) 0.006(4) 0.002(3) -0.003(4) 
C54 0.040(6) 0.044(7) 0.027(5) -0.014(5) 0.014(5) -0.002(5) 
C55 0.029(5) 0.030(5) 0.016(4) 0.005(4) 0.008(4) -0.005(4) 
C56 0.033(6) 0.051(7) 0.024(5) 0.011(5) 0.014(5) 0.007(5) 
C60 0.025(5) 0.009(4) 0.013(4) 0.005(3) 0.005(4) -0.008(4) 
C63 0.014(4) 0.013(4) 0.022(4) 0.003(4) 0.006(4) 0.002(4) 
C64 0.023(5) 0.024(5) 0.017(4) -0.002(4) 0.010(4) -0.004(4) 
C65 0.019(5) 0.016(5) 0.020(5) 0.000(4) 0.004(4) -0.002(4) 
C66 0.017(5) 0.030(5) 0.017(4) -0.001(4) -0.001(4) 0.006(4) 
C102 0.026(5) 0.023(5) 0.011(4) 0.002(4) 0.002(4) 0.003(4) 
C103 0.013(4) 0.034(6) 0.017(4) -0.004(4) -0.002(4) 0.006(4) 
C104 0.024(5) 0.037(6) 0.016(4) -0.004(4) 0.006(4) -0.015(5) 
C105 0.026(5) 0.015(4) 0.016(4) 0.007(4) 0.006(4) -0.001(4) 
C106 0.014(4) 0.021(5) 0.019(4) 0.010(4) 0.001(4) 0.004(4) 
C202 0.016(4) 0.013(4) 0.023(5) -0.001(4) 0.002(4) -0.001(4) 
C203 0.018(5) 0.018(5) 0.021(5) -0.002(4) 0.001(4) -0.002(4) 
C204 0.039(6) 0.015(5) 0.026(5) -0.003(4) 0.018(5) 0.002(4) 
C205 0.016(4) 0.016(4) 0.023(5) -0.002(4) 0.006(4) 0.003(4) 
C206 0.014(4) 0.024(5) 0.015(4) -0.005(4) 0.003(3) 0.001(4) 
C302 0.020(5) 0.019(5) 0.022(5) 0.002(4) 0.004(4) -0.005(4) 
C303 0.027(5) 0.020(5) 0.027(5) -0.002(4) 0.006(4) 0.001(4) 
C304 0.019(5) 0.019(5) 0.022(5) -0.003(4) 0.001(4) -0.002(4) 
C305 0.023(5) 0.024(5) 0.027(5) -0.011(4) 0.005(4) -0.005(4) 
C306 0.027(5) 0.019(5) 0.024(4) -0.002(4) 0.012(4) 0.001(4) 
  
_geom_special_details 
; 
 All esds (except the esd in the dihedral angle between two l.s. planes) 
 are estimated using the full covariance matrix.  The cell esds are taken 
 into account individually in the estimation of esds in distances, angles 
 and torsion angles; correlations between esds in cell parameters are only 
 used when they are defined by crystal symmetry.  An approximate (isotropic) 
 treatment of cell esds is used for estimating esds involving l.s. planes. 
; 
  
loop_ 
 _geom_bond_atom_site_label_1 
 _geom_bond_atom_site_label_2 
 _geom_bond_distance 
 _geom_bond_site_symmetry_2 
 _geom_bond_publ_flag 
Fe1 O1 2.040(6) . ? 
Fe1 O11 2.070(6) . ? 
Fe1 O52 2.082(6) . ? 
Fe1 O62 2.128(6) . ? 
Fe1 O21 2.145(6) . ? 
Fe1 N101 2.199(7) . ? 
Fe1 Fe2 3.3145(18) . ? 
Fe1 Fe3 3.3591(19) . ? 
Fe2 O1 1.824(6) . ? 
Fe2 O22 2.005(6) . ? 
Fe2 O31 2.034(6) . ? 
Fe2 O12 2.036(6) . ? 
Fe2 O41 2.065(6) . ? 
Fe2 N201 2.235(7) . ? 
Fe2 Fe3 3.2423(18) . ? 
Fe3 O1 1.861(6) . ? 
Fe3 O61 2.013(6) . ? 
Fe3 O51 2.021(6) . ? 
Fe3 O42 2.042(6) . ? 
Fe3 O32 2.068(6) . ? 
Fe3 N301 2.237(8) . ? 
O11 C10 1.254(10) . ? 
O12 C10 1.264(10) . ? 
O22 C20 1.258(10) . ? 
O21 C20 1.242(11) . ? 
O31 C30 1.263(10) . ? 
O32 C30 1.288(10) . ? 
O41 C40 1.248(10) . ? 
O42 C40 1.271(10) . ? 
O51 C50 1.262(10) . ? 
O52 C50 1.265(10) . ? 
O61 C60 1.277(10) . ? 
O62 C60 1.259(10) . ? 
N101 C106 1.341(11) . ? 
N101 C102 1.346(11) . ? 
N201 C202 1.343(11) . ? 
N201 C206 1.351(11) . ? 
N301 C302 1.328(11) . ? 
N301 C306 1.331(11) . ? 
C10 C13 1.550(11) . ? 
C13 C16 1.513(12) . ? 
C13 C15 1.521(12) . ? 
C13 C14 1.550(12) . ? 
C20 C23 1.535(12) . ? 
C23 C25 1.500(13) . ? 
C23 C24 1.538(13) . ? 
C23 C26 1.549(12) . ? 
C30 C33 1.522(11) . ? 
C33 C36 1.513(12) . ? 
C33 C34 1.524(12) . ? 
C33 C35 1.556(12) . ? 
C40 C43 1.543(12) . ? 
C43 C44 1.514(14) . ? 
C43 C46 1.526(13) . ? 
C43 C45 1.541(12) . ? 
C50 C53 1.524(11) . ? 
C53 C56 1.519(13) . ? 
C53 C55 1.525(12) . ? 
C53 C54 1.561(13) . ? 
C60 C63 1.520(12) . ? 
C63 C66 1.519(11) . ? 
C63 C65 1.540(11) . ? 
C63 C64 1.542(12) . ? 
C102 C103 1.394(13) . ? 
C103 C104 1.370(14) . ? 
C104 C105 1.358(13) . ? 
C105 C106 1.401(12) . ? 
C202 C203 1.398(12) . ? 
C203 C204 1.401(13) . ? 
C204 C205 1.372(13) . ? 
C205 C206 1.398(12) . ? 
C302 C303 1.402(12) . ? 
C303 C304 1.390(12) . ? 
C304 C305 1.359(13) . ? 
C305 C306 1.400(12) . ? 
  
loop_ 
 _geom_angle_atom_site_label_1 
 _geom_angle_atom_site_label_2 
 _geom_angle_atom_site_label_3 
 _geom_angle 
 _geom_angle_site_symmetry_1 
 _geom_angle_site_symmetry_3 
 _geom_angle_publ_flag 
O1 Fe1 O11 95.0(2) . . ? 
O1 Fe1 O52 91.7(2) . . ? 
O11 Fe1 O52 173.1(2) . . ? 
O1 Fe1 O62 90.4(2) . . ? 
O11 Fe1 O62 89.0(2) . . ? 
O52 Fe1 O62 92.3(2) . . ? 
O1 Fe1 O21 92.5(2) . . ? 
O11 Fe1 O21 89.4(2) . . ? 
O52 Fe1 O21 89.0(2) . . ? 
O62 Fe1 O21 176.8(2) . . ? 
O1 Fe1 N101 174.0(3) . . ? 
O11 Fe1 N101 90.6(2) . . ? 
O52 Fe1 N101 82.6(2) . . ? 
O62 Fe1 N101 87.6(2) . . ? 
O21 Fe1 N101 89.6(2) . . ? 
O1 Fe1 Fe2 29.08(16) . . ? 
O11 Fe1 Fe2 72.19(17) . . ? 
O52 Fe1 Fe2 113.81(16) . . ? 
O62 Fe1 Fe2 107.24(16) . . ? 
O21 Fe1 Fe2 74.84(17) . . ? 
N101 Fe1 Fe2 156.6(2) . . ? 
O1 Fe1 Fe3 29.06(16) . . ? 
O11 Fe1 Fe3 117.02(17) . . ? 
O52 Fe1 Fe3 69.79(16) . . ? 
O62 Fe1 Fe3 73.06(15) . . ? 
O21 Fe1 Fe3 110.16(17) . . ? 
N101 Fe1 Fe3 145.2(2) . . ? 
Fe2 Fe1 Fe3 58.13(4) . . ? 
O1 Fe2 O22 98.5(3) . . ? 
O1 Fe2 O31 95.0(3) . . ? 
O22 Fe2 O31 166.4(3) . . ? 
O1 Fe2 O12 97.0(3) . . ? 
O22 Fe2 O12 90.4(2) . . ? 
O31 Fe2 O12 89.2(2) . . ? 
O1 Fe2 O41 95.3(3) . . ? 
O22 Fe2 O41 87.6(2) . . ? 
O31 Fe2 O41 89.8(2) . . ? 
O12 Fe2 O41 167.7(2) . . ? 
O1 Fe2 N201 177.4(3) . . ? 
O22 Fe2 N201 83.5(3) . . ? 
O31 Fe2 N201 82.9(3) . . ? 
O12 Fe2 N201 84.5(3) . . ? 
O41 Fe2 N201 83.1(3) . . ? 
O1 Fe2 Fe3 28.71(19) . . ? 
O22 Fe2 Fe3 119.75(18) . . ? 
O31 Fe2 Fe3 72.57(18) . . ? 
O12 Fe2 Fe3 113.60(17) . . ? 
O41 Fe2 Fe3 77.78(17) . . ? 
N201 Fe2 Fe3 148.7(2) . . ? 
O1 Fe2 Fe1 32.92(19) . . ? 
O22 Fe2 Fe1 73.45(18) . . ? 
O31 Fe2 Fe1 119.58(19) . . ? 
O12 Fe2 Fe1 76.29(17) . . ? 
O41 Fe2 Fe1 114.68(18) . . ? 
N201 Fe2 Fe1 149.6(2) . . ? 
Fe3 Fe2 Fe1 61.62(4) . . ? 
O1 Fe3 O61 98.8(3) . . ? 
O1 Fe3 O51 94.9(2) . . ? 
O61 Fe3 O51 94.8(2) . . ? 
O1 Fe3 O42 94.7(2) . . ? 
O61 Fe3 O42 166.0(2) . . ? 
O51 Fe3 O42 87.5(2) . . ? 
O1 Fe3 O32 95.8(2) . . ? 
O61 Fe3 O32 86.9(2) . . ? 
O51 Fe3 O32 168.8(2) . . ? 
O42 Fe3 O32 88.2(2) . . ? 
O1 Fe3 N301 174.5(3) . . ? 
O61 Fe3 N301 85.7(2) . . ? 
O51 Fe3 N301 81.6(2) . . ? 
O42 Fe3 N301 81.0(2) . . ? 
O32 Fe3 N301 87.5(2) . . ? 
O1 Fe3 Fe2 28.09(18) . . ? 
O61 Fe3 Fe2 119.28(17) . . ? 
O51 Fe3 Fe2 110.07(17) . . ? 
O42 Fe3 Fe2 72.39(17) . . ? 
O32 Fe3 Fe2 78.42(16) . . ? 
N301 Fe3 Fe2 150.02(19) . . ? 
O1 Fe3 Fe1 32.16(18) . . ? 
O61 Fe3 Fe1 73.99(17) . . ? 
O51 Fe3 Fe1 77.06(16) . . ? 
O42 Fe3 Fe1 119.91(17) . . ? 
O32 Fe3 Fe1 113.98(16) . . ? 
N301 Fe3 Fe1 148.98(19) . . ? 
Fe2 Fe3 Fe1 60.24(4) . . ? 
Fe2 O1 Fe3 123.2(3) . . ? 
Fe2 O1 Fe1 118.0(3) . . ? 
Fe3 O1 Fe1 118.8(3) . . ? 
C10 O11 Fe1 132.4(6) . . ? 
C10 O12 Fe2 128.9(5) . . ? 
C20 O22 Fe2 134.1(6) . . ? 
C20 O21 Fe1 127.0(6) . . ? 
C30 O31 Fe2 133.2(6) . . ? 
C30 O32 Fe3 125.1(5) . . ? 
C40 O41 Fe2 125.7(6) . . ? 
C40 O42 Fe3 131.7(6) . . ? 
C50 O51 Fe3 127.8(5) . . ? 
C50 O52 Fe1 132.0(5) . . ? 
C60 O61 Fe3 130.6(6) . . ? 
C60 O62 Fe1 130.1(5) . . ? 
C106 N101 C102 116.4(8) . . ? 
C106 N101 Fe1 119.3(6) . . ? 
C102 N101 Fe1 124.2(6) . . ? 
C202 N201 C206 118.0(8) . . ? 
C202 N201 Fe2 121.3(6) . . ? 
C206 N201 Fe2 120.7(6) . . ? 
C302 N301 C306 116.9(8) . . ? 
C302 N301 Fe3 120.8(6) . . ? 
C306 N301 Fe3 121.8(6) . . ? 
O11 C10 O12 125.8(8) . . ? 
O11 C10 C13 118.0(8) . . ? 
O12 C10 C13 116.1(7) . . ? 
C16 C13 C15 111.2(7) . . ? 
C16 C13 C14 109.7(7) . . ? 
C15 C13 C14 108.8(8) . . ? 
C16 C13 C10 112.2(7) . . ? 
C15 C13 C10 106.5(7) . . ? 
C14 C13 C10 108.4(7) . . ? 
O21 C20 O22 126.2(8) . . ? 
O21 C20 C23 119.4(8) . . ? 
O22 C20 C23 114.4(8) . . ? 
C25 C23 C20 113.6(8) . . ? 
C25 C23 C24 109.2(8) . . ? 
C20 C23 C24 108.7(7) . . ? 
C25 C23 C26 109.9(8) . . ? 
C20 C23 C26 107.5(7) . . ? 
C24 C23 C26 107.9(8) . . ? 
O31 C30 O32 125.0(8) . . ? 
O31 C30 C33 117.4(8) . . ? 
O32 C30 C33 117.5(7) . . ? 
C36 C33 C30 112.8(7) . . ? 
C36 C33 C34 111.4(7) . . ? 
C30 C33 C34 110.3(7) . . ? 
C36 C33 C35 109.6(8) . . ? 
C30 C33 C35 104.6(7) . . ? 
C34 C33 C35 107.7(8) . . ? 
O41 C40 O42 126.1(8) . . ? 
O41 C40 C43 116.7(8) . . ? 
O42 C40 C43 117.1(8) . . ? 
C44 C43 C46 112.1(8) . . ? 
C44 C43 C45 110.9(8) . . ? 
C46 C43 C45 108.6(8) . . ? 
C44 C43 C40 107.1(7) . . ? 
C46 C43 C40 108.3(7) . . ? 
C45 C43 C40 109.7(7) . . ? 
O51 C50 O52 125.4(8) . . ? 
O51 C50 C53 116.7(8) . . ? 
O52 C50 C53 117.8(8) . . ? 
C56 C53 C50 109.8(8) . . ? 
C56 C53 C55 110.6(8) . . ? 
C50 C53 C55 111.6(7) . . ? 
C56 C53 C54 107.7(8) . . ? 
C50 C53 C54 107.0(7) . . ? 
C55 C53 C54 110.0(8) . . ? 
O62 C60 O61 124.7(8) . . ? 
O62 C60 C63 117.8(7) . . ? 
O61 C60 C63 117.5(8) . . ? 
C66 C63 C60 112.3(7) . . ? 
C66 C63 C65 110.1(7) . . ? 
C60 C63 C65 106.5(7) . . ? 
C66 C63 C64 109.4(7) . . ? 
C60 C63 C64 108.8(7) . . ? 
C65 C63 C64 109.7(7) . . ? 
N101 C102 C103 123.7(9) . . ? 
C104 C103 C102 117.8(9) . . ? 
C105 C104 C103 120.4(9) . . ? 
C104 C105 C106 118.4(9) . . ? 
N101 C106 C105 123.2(8) . . ? 
N201 C202 C203 123.1(8) . . ? 
C202 C203 C204 118.1(8) . . ? 
C205 C204 C203 119.0(9) . . ? 
C204 C205 C206 119.6(9) . . ? 
N201 C206 C205 122.1(8) . . ? 
N301 C302 C303 124.7(9) . . ? 
C304 C303 C302 116.5(9) . . ? 
C305 C304 C303 119.9(9) . . ? 
C304 C305 C306 119.0(9) . . ? 
N301 C306 C305 123.0(9) . . ? 
  
_diffrn_measured_fraction_theta_max    0.833 
_diffrn_reflns_theta_full              21.52 
_diffrn_measured_fraction_theta_full   0.833 
_refine_diff_density_max    1.106 
_refine_diff_density_min   -0.631 
_refine_diff_density_rms    0.112 
#===END
 
data_fe35
 
_audit_creation_method            SHELXL-97 
_chemical_name_systematic 
; 
 ? 
; 
_chemical_name_common             ? 
_chemical_melting_point           ? 
_chemical_formula_moiety          ? 
_chemical_formula_sum 
 'C45 H69 Fe3 N3 O13' 
_chemical_formula_weight          1027.58 
 
loop_ 
 _atom_type_symbol 
 _atom_type_description 
 _atom_type_scat_dispersion_real 
 _atom_type_scat_dispersion_imag 
 _atom_type_scat_source 
 'C'  'C'   0.0033   0.0016 
 'International Tables Vol C Tables 4.2.6.8 and 6.1.1.4' 
 'H'  'H'   0.0000   0.0000 
 'International Tables Vol C Tables 4.2.6.8 and 6.1.1.4' 
 'N'  'N'   0.0061   0.0033 
 'International Tables Vol C Tables 4.2.6.8 and 6.1.1.4' 
 'O'  'O'   0.0106   0.0060 
 'International Tables Vol C Tables 4.2.6.8 and 6.1.1.4' 
 'Fe'  'Fe'   0.3463   0.8444 
 'International Tables Vol C Tables 4.2.6.8 and 6.1.1.4' 
 
_symmetry_cell_setting            monoclinic 
_symmetry_space_group_name_H-M    P2(1)
 
loop_ 
 _symmetry_equiv_pos_as_xyz 
 'x, y, z' 
 '-x, y+1/2, -z' 
 
_cell_length_a                    11.573(2) 
_cell_length_b                    19.725(4) 
_cell_length_c                    11.847(2) 
_cell_angle_alpha                 90.00 
_cell_angle_beta                  106.469(9) 
_cell_angle_gamma                 90.00 
_cell_volume                      2593.5(9) 
_cell_formula_units_Z             2 
_cell_measurement_temperature    35(2) 
_cell_measurement_reflns_used     470
_cell_measurement_theta_min      10.31 
_cell_measurement_theta_max      21.81
 
_exptl_crystal_description        'irregular block' 
_exptl_crystal_colour             'red brown'
_exptl_crystal_size_max           0.34
_exptl_crystal_size_mid          0.3 
_exptl_crystal_size_min           0.2 
_exptl_crystal_density_meas       ? 
_exptl_crystal_density_diffrn     1.316 
_exptl_crystal_density_method     'not measured' 
_exptl_crystal_F_000              1084 
_exptl_absorpt_coefficient_mu     0.888 
_exptl_absorpt_correction_type  empirical
_exptl_absorpt_correction_T_min   0.606
_exptl_absorpt_correction_T_max    0.647  
_exptl_absorpt_process_details     ' XPREP'
 
_exptl_special_details 
; 
 ? 
; 
 
_diffrn_ambient_temperature       35(2) 
_diffrn_radiation_wavelength      0.71073 
_diffrn_radiation_type            MoK\a 
_diffrn_radiation_source          'fine-focus sealed tube' 
_diffrn_radiation_monochromator   graphite 
_diffrn_measurement_device_type   'Bruker SMART CCD, LTX' 
_diffrn_measurement_method        'narrow phi-scans'
_diffrn_detector_area_resol_mean  ? 
_diffrn_standards_number          ? 
_diffrn_standards_interval_count  ? 
_diffrn_standards_interval_time   ? 
_diffrn_standards_decay_%         ? 
_diffrn_reflns_number             10827 
_diffrn_reflns_av_R_equivalents   0.0390 
_diffrn_reflns_av_sigmaI/netI     0.0584 
_diffrn_reflns_limit_h_min        -13 
_diffrn_reflns_limit_h_max        14 
_diffrn_reflns_limit_k_min        -14 
_diffrn_reflns_limit_k_max        23 
_diffrn_reflns_limit_l_min        -14 
_diffrn_reflns_limit_l_max        13 
_diffrn_reflns_theta_min          2.40 
_diffrn_reflns_theta_max          26.37 
_reflns_number_total              6578 
_reflns_number_gt                 5670 
_reflns_threshold_expression      >2sigma(I) 
 
_computing_data_collection        'SMART' 
_computing_cell_refinement        'SMART'
_computing_data_reduction         'SAINT'
_computing_structure_solution     'SHELXS-97 (Sheldrick, 1990)' 
_computing_structure_refinement   'SHELXL-97 (Sheldrick, 1997)' 
_computing_molecular_graphics     ? 
_computing_publication_material   ? 
 
_refine_special_details 
; 
 Refinement of F^2^ against ALL reflections.  The weighted R-factor wR and 
 goodness of fit S are based on F^2^, conventional R-factors R are based 
 on F, with F set to zero for negative F^2^. The threshold expression of 
 F^2^ > 2sigma(F^2^) is used only for calculating R-factors(gt) etc. and is 
 not relevant to the choice of reflections for refinement.  R-factors based 
 on F^2^ are statistically about twice as large as those based on F, and R- 
 factors based on ALL data will be even larger. 
; 
 
_refine_ls_structure_factor_coef  Fsqd  
_refine_ls_matrix_type            full 
_refine_ls_weighting_scheme       calc  
_refine_ls_weighting_details 
 'calc w=1/[\s^2^(Fo^2^)+(0.0394P)^2^+0.0000P] where P=(Fo^2^+2Fc^2^)/3' 
_atom_sites_solution_primary      direct 
_atom_sites_solution_secondary    difmap 
_atom_sites_solution_hydrogens    geom 
_refine_ls_hydrogen_treatment     mixed 
_refine_ls_extinction_method      SHELXL 
_refine_ls_extinction_coef        0.0008(4) 
_refine_ls_extinction_expression 
 'Fc^*^=kFc[1+0.001xFc^2^\l^3^/sin(2\q)]^-1/4^' 
_refine_ls_abs_structure_details 
 'Flack H D (1983), Acta Cryst. A39, 876-881' 
_refine_ls_abs_structure_Flack    0.020(16) 
_refine_ls_number_reflns          6578 
_refine_ls_number_parameters      579 
_refine_ls_number_restraints      1 
_refine_ls_R_factor_all           0.0474 
_refine_ls_R_factor_gt            0.0348 
_refine_ls_wR_factor_ref          0.0797 
_refine_ls_wR_factor_gt           0.0735 
_refine_ls_goodness_of_fit_ref    1.067 
_refine_ls_restrained_S_all       1.067 
_refine_ls_shift/su_max           0.001 
_refine_ls_shift/su_mean          0.000 
 
loop_ 
 _atom_site_label 
 _atom_site_type_symbol 
 _atom_site_fract_x 
 _atom_site_fract_y 
 _atom_site_fract_z 
 _atom_site_U_iso_or_equiv 
 _atom_site_adp_type 
 _atom_site_occupancy 
 _atom_site_symmetry_multiplicity 
 _atom_site_calc_flag 
 _atom_site_refinement_flags 
 _atom_site_disorder_assembly 
 _atom_site_disorder_group 
Fe1 Fe 0.89784(5) 0.17583(3) 0.26699(5) 0.01450(16) Uani 1 1 d . . . 
Fe2 Fe 0.75694(5) 0.03394(3) 0.29853(5) 0.01378(16) Uani 1 1 d . . . 
Fe3 Fe 0.59569(5) 0.16427(3) 0.18461(5) 0.01411(16) Uani 1 1 d . . . 
O1 O 0.7433(2) 0.12232(15) 0.2503(2) 0.0129(7) Uani 1 1 d . . . 
O11 O 0.9888(2) 0.13361(15) 0.4290(2) 0.0157(7) Uani 1 1 d . . . 
O12 O 0.8682(2) 0.05091(16) 0.4623(2) 0.0161(7) Uani 1 1 d . . . 
O22 O 0.8976(2) 0.00658(15) 0.2423(2) 0.0156(7) Uani 1 1 d . . . 
O21 O 0.9739(2) 0.09915(16) 0.1805(2) 0.0175(7) Uani 1 1 d . . . 
O31 O 0.6142(2) 0.03793(16) 0.3674(2) 0.0146(6) Uani 1 1 d . . . 
O32 O 0.5242(3) 0.13934(15) 0.3218(2) 0.0156(7) Uani 1 1 d . . . 
O41 O 0.6457(2) -0.00580(15) 0.1448(2) 0.0140(7) Uani 1 1 d . . . 
O42 O 0.5126(2) 0.07969(16) 0.0969(2) 0.0165(7) Uani 1 1 d . . . 
O51 O 0.6329(2) 0.19251(15) 0.0340(2) 0.0158(7) Uani 1 1 d . . . 
O52 O 0.8269(2) 0.22251(16) 0.1050(2) 0.0154(7) Uani 1 1 d . . . 
O61 O 0.6353(2) 0.25561(15) 0.2620(2) 0.0151(7) Uani 1 1 d . . . 
O62 O 0.8335(2) 0.25374(16) 0.3585(2) 0.0160(7) Uani 1 1 d . . . 
N101 N 1.0529(3) 0.24129(19) 0.2752(3) 0.0153(9) Uani 1 1 d . . . 
N201 N 0.7645(3) -0.07359(19) 0.3583(3) 0.0147(8) Uani 1 1 d . . . 
N301 N 0.4169(3) 0.20944(19) 0.0930(3) 0.0171(9) Uani 1 1 d . . . 
C10 C 0.9558(4) 0.0918(2) 0.4932(4) 0.0141(10) Uani 1 1 d . . . 
C13 C 1.0279(4) 0.0916(2) 0.6255(3) 0.0161(10) Uani 1 1 d . . . 
C14 C 1.1629(4) 0.0922(3) 0.6365(4) 0.0232(11) Uani 1 1 d . . . 
H14A H 1.1843 0.0510 0.6041 0.035 Uiso 1 1 calc R . . 
H14B H 1.2077 0.0955 0.7180 0.035 Uiso 1 1 calc R . . 
H14C H 1.1813 0.1303 0.5944 0.035 Uiso 1 1 calc R . . 
C15 C 0.9939(4) 0.1573(3) 0.6774(4) 0.0257(12) Uani 1 1 d . . . 
H15A H 0.9095 0.1568 0.6713 0.038 Uiso 1 1 calc R . . 
H15B H 1.0116 0.1954 0.6347 0.038 Uiso 1 1 calc R . . 
H15C H 1.0395 0.1608 0.7586 0.038 Uiso 1 1 calc R . . 
C16 C 0.9963(4) 0.0303(3) 0.6878(4) 0.0226(11) Uani 1 1 d . . . 
H16A H 0.9113 0.0302 0.6796 0.034 Uiso 1 1 calc R . . 
H16B H 1.0399 0.0321 0.7698 0.034 Uiso 1 1 calc R . . 
H16C H 1.0175 -0.0103 0.6536 0.034 Uiso 1 1 calc R . . 
C20 C 0.9606(3) 0.0367(3) 0.1863(3) 0.0134(9) Uani 1 1 d . . . 
C23 C 1.0267(4) -0.0113(2) 0.1224(4) 0.0175(10) Uani 1 1 d . . . 
C24 C 0.9317(4) -0.0513(3) 0.0316(4) 0.0297(12) Uani 1 1 d . . . 
H24A H 0.8838 -0.0208 -0.0260 0.045 Uiso 1 1 calc R . . 
H24B H 0.8808 -0.0749 0.0700 0.045 Uiso 1 1 calc R . . 
H24C H 0.9705 -0.0834 -0.0065 0.045 Uiso 1 1 calc R . . 
C25 C 1.1053(4) 0.0274(3) 0.0617(4) 0.0300(12) Uani 1 1 d . . . 
H25A H 1.0561 0.0577 0.0045 0.045 Uiso 1 1 calc R . . 
H25B H 1.1451 -0.0039 0.0232 0.045 Uiso 1 1 calc R . . 
H25C H 1.1644 0.0531 0.1190 0.045 Uiso 1 1 calc R . . 
C26 C 1.1037(4) -0.0602(3) 0.2140(4) 0.0236(12) Uani 1 1 d . . . 
H26A H 1.1647 -0.0351 0.2703 0.035 Uiso 1 1 calc R . . 
H26B H 1.1412 -0.0927 0.1754 0.035 Uiso 1 1 calc R . . 
H26C H 1.0535 -0.0833 0.2536 0.035 Uiso 1 1 calc R . . 
C30 C 0.5489(3) 0.0858(2) 0.3836(4) 0.0139(10) Uani 1 1 d . . . 
C33 C 0.4876(4) 0.0757(2) 0.4816(4) 0.0160(10) Uani 1 1 d . . . 
C34 C 0.5625(4) 0.0282(3) 0.5763(4) 0.0255(11) Uani 1 1 d . . . 
H34A H 0.6385 0.0491 0.6141 0.038 Uiso 1 1 calc R . . 
H34B H 0.5759 -0.0137 0.5406 0.038 Uiso 1 1 calc R . . 
H34C H 0.5201 0.0193 0.6336 0.038 Uiso 1 1 calc R . . 
C35 C 0.3650(4) 0.0424(3) 0.4208(4) 0.0287(12) Uani 1 1 d . . . 
H35A H 0.3185 0.0721 0.3608 0.043 Uiso 1 1 calc R . . 
H35B H 0.3222 0.0340 0.4779 0.043 Uiso 1 1 calc R . . 
H35C H 0.3781 0.0002 0.3858 0.043 Uiso 1 1 calc R . . 
C36 C 0.4672(4) 0.1435(2) 0.5345(4) 0.0206(11) Uani 1 1 d . . . 
H36A H 0.5435 0.1643 0.5714 0.031 Uiso 1 1 calc R . . 
H36B H 0.4244 0.1363 0.5921 0.031 Uiso 1 1 calc R . . 
H36C H 0.4208 0.1726 0.4734 0.031 Uiso 1 1 calc R . . 
C40 C 0.5529(4) 0.0228(2) 0.0784(4) 0.0161(10) Uani 1 1 d . . . 
C43 C 0.4833(4) -0.0163(2) -0.0306(4) 0.0208(11) Uani 1 1 d . . . 
C44 C 0.4255(4) -0.0766(3) 0.0132(4) 0.0303(13) Uani 1 1 d . . . 
H44A H 0.3707 -0.0605 0.0546 0.046 Uiso 1 1 calc R . . 
H44B H 0.4871 -0.1035 0.0652 0.046 Uiso 1 1 calc R . . 
H44C H 0.3825 -0.1036 -0.0527 0.046 Uiso 1 1 calc R . . 
C45 C 0.3861(4) 0.0288(3) -0.1107(4) 0.0341(13) Uani 1 1 d . . . 
H45A H 0.3311 0.0437 -0.0685 0.051 Uiso 1 1 calc R . . 
H45B H 0.3430 0.0035 -0.1788 0.051 Uiso 1 1 calc R . . 
H45C H 0.4234 0.0675 -0.1349 0.051 Uiso 1 1 calc R . . 
C46 C 0.5698(4) -0.0404(3) -0.0986(4) 0.0257(12) Uani 1 1 d . . . 
H46A H 0.6305 -0.0688 -0.0488 0.038 Uiso 1 1 calc R . . 
H46B H 0.6073 -0.0018 -0.1230 0.038 Uiso 1 1 calc R . . 
H46C H 0.5259 -0.0656 -0.1666 0.038 Uiso 1 1 calc R . . 
C50 C 0.7335(4) 0.2116(2) 0.0225(4) 0.0140(10) Uani 1 1 d . . . 
C53 C 0.7399(4) 0.2198(2) -0.1043(4) 0.0151(10) Uani 1 1 d . . . 
C54 C 0.7341(5) 0.1473(3) -0.1549(4) 0.0318(13) Uani 1 1 d . . . 
H54A H 0.8026 0.1218 -0.1103 0.048 Uiso 1 1 calc R . . 
H54B H 0.7348 0.1494 -0.2356 0.048 Uiso 1 1 calc R . . 
H54C H 0.6615 0.1255 -0.1501 0.048 Uiso 1 1 calc R . . 
C55 C 0.8575(4) 0.2535(3) -0.1056(4) 0.0255(12) Uani 1 1 d . . . 
H55A H 0.9240 0.2269 -0.0603 0.038 Uiso 1 1 calc R . . 
H55B H 0.8614 0.2981 -0.0722 0.038 Uiso 1 1 calc R . . 
H55C H 0.8614 0.2569 -0.1853 0.038 Uiso 1 1 calc R . . 
C56 C 0.6315(4) 0.2607(3) -0.1764(4) 0.0307(13) Uani 1 1 d . . . 
H56A H 0.6350 0.3058 -0.1449 0.046 Uiso 1 1 calc R . . 
H56B H 0.5584 0.2391 -0.1726 0.046 Uiso 1 1 calc R . . 
H56C H 0.6333 0.2630 -0.2568 0.046 Uiso 1 1 calc R . . 
C60 C 0.7284(4) 0.2740(2) 0.3439(4) 0.0140(10) Uani 1 1 d . . . 
C63 C 0.7089(4) 0.3274(2) 0.4308(4) 0.0157(10) Uani 1 1 d . . . 
C64 C 0.7665(4) 0.3016(2) 0.5564(3) 0.0174(10) Uani 1 1 d . . . 
H64A H 0.7552 0.3346 0.6119 0.026 Uiso 1 1 calc R . . 
H64B H 0.8511 0.2944 0.5681 0.026 Uiso 1 1 calc R . . 
H64C H 0.7292 0.2597 0.5678 0.026 Uiso 1 1 calc R . . 
C65 C 0.7701(4) 0.3926(2) 0.4102(4) 0.0197(11) Uani 1 1 d . . . 
H65A H 0.7588 0.4269 0.4637 0.030 Uiso 1 1 calc R . . 
H65B H 0.7353 0.4076 0.3307 0.030 Uiso 1 1 calc R . . 
H65C H 0.8547 0.3846 0.4233 0.030 Uiso 1 1 calc R . . 
C66 C 0.5756(4) 0.3413(3) 0.4137(4) 0.0221(11) Uani 1 1 d . . . 
H66A H 0.5668 0.3750 0.4691 0.033 Uiso 1 1 calc R . . 
H66B H 0.5364 0.3002 0.4262 0.033 Uiso 1 1 calc R . . 
H66C H 0.5395 0.3573 0.3351 0.033 Uiso 1 1 calc R . . 
C102 C 1.1664(4) 0.2193(2) 0.2948(4) 0.0188(11) Uani 1 1 d . . . 
H10A H 1.1816 0.1734 0.3099 0.023 Uiso 1 1 calc R . . 
C103 C 1.2623(4) 0.2607(3) 0.2939(4) 0.0202(11) Uani 1 1 d . . . 
H10B H 1.3392 0.2427 0.3069 0.024 Uiso 1 1 calc R . . 
C104 C 1.2426(4) 0.3283(3) 0.2739(4) 0.0241(12) Uani 1 1 d . . . 
H10C H 1.3063 0.3572 0.2745 0.029 Uiso 1 1 calc R . . 
C105 C 1.1272(4) 0.3533(3) 0.2525(4) 0.0194(11) Uani 1 1 d . . . 
H10D H 1.1114 0.3992 0.2380 0.023 Uiso 1 1 calc R . . 
C106 C 1.0354(4) 0.3083(2) 0.2533(4) 0.0161(10) Uani 1 1 d . . . 
H10E H 0.9574 0.3252 0.2377 0.019 Uiso 1 1 calc R . . 
C202 C 0.6636(4) -0.1108(2) 0.3431(4) 0.0161(10) Uani 1 1 d . . . 
H20A H 0.5893 -0.0905 0.3090 0.019 Uiso 1 1 calc R . . 
C203 C 0.6664(4) -0.1783(2) 0.3766(4) 0.0169(10) Uani 1 1 d . . . 
H20B H 0.5951 -0.2025 0.3651 0.020 Uiso 1 1 calc R . . 
C204 C 0.7752(4) -0.2092(2) 0.4268(4) 0.0167(10) Uani 1 1 d . . . 
H20C H 0.7785 -0.2546 0.4488 0.020 Uiso 1 1 calc R . . 
C205 C 0.8797(4) -0.1718(2) 0.4441(4) 0.0160(10) Uani 1 1 d . . . 
H20D H 0.9546 -0.1913 0.4787 0.019 Uiso 1 1 calc R . . 
C206 C 0.8705(4) -0.1047(2) 0.4088(3) 0.0156(10) Uani 1 1 d . . . 
H20E H 0.9410 -0.0797 0.4204 0.019 Uiso 1 1 calc R . . 
C302 C 0.4104(4) 0.2683(2) 0.0342(4) 0.0180(10) Uani 1 1 d . . . 
H30A H 0.4811 0.2927 0.0434 0.022 Uiso 1 1 calc R . . 
C303 C 0.3045(4) 0.2948(3) -0.0395(4) 0.0223(11) Uani 1 1 d . . . 
H30B H 0.3046 0.3350 -0.0803 0.027 Uiso 1 1 calc R . . 
C304 C 0.1998(4) 0.2597(3) -0.0500(4) 0.0252(12) Uani 1 1 d . . . 
H30C H 0.1270 0.2765 -0.0971 0.030 Uiso 1 1 calc R . . 
C305 C 0.2028(4) 0.1991(3) 0.0099(4) 0.0261(12) Uani 1 1 d . . . 
H30D H 0.1325 0.1746 0.0035 0.031 Uiso 1 1 calc R . . 
C306 C 0.3137(4) 0.1755(3) 0.0800(4) 0.0208(10) Uani 1 1 d . . . 
H30E H 0.3161 0.1345 0.1193 0.025 Uiso 1 1 calc R . . 
 
loop_ 
 _atom_site_aniso_label 
 _atom_site_aniso_U_11 
 _atom_site_aniso_U_22 
 _atom_site_aniso_U_33 
 _atom_site_aniso_U_23 
 _atom_site_aniso_U_13 
 _atom_site_aniso_U_12 
Fe1 0.0193(3) 0.0119(4) 0.0118(3) 0.0012(3) 0.0035(2) 0.0020(3) 
Fe2 0.0163(3) 0.0115(4) 0.0130(3) 0.0005(3) 0.0033(3) 0.0013(3) 
Fe3 0.0189(3) 0.0108(4) 0.0122(3) 0.0001(3) 0.0038(2) -0.0015(3) 
O1 0.0111(14) 0.0117(18) 0.0154(15) 0.0001(13) 0.0029(12) 0.0007(13) 
O11 0.0170(16) 0.0159(18) 0.0119(15) 0.0024(14) 0.0003(13) 0.0004(15) 
O12 0.0165(15) 0.0155(19) 0.0125(15) -0.0006(13) -0.0023(12) -0.0036(15) 
O22 0.0176(16) 0.0128(17) 0.0171(16) 0.0014(13) 0.0059(13) -0.0001(14) 
O21 0.0168(16) 0.017(2) 0.0171(16) 0.0006(14) 0.0021(13) -0.0062(15) 
O31 0.0151(14) 0.0103(16) 0.0194(15) -0.0007(15) 0.0066(12) -0.0023(16) 
O32 0.0179(16) 0.0131(18) 0.0157(16) 0.0011(14) 0.0045(13) -0.0039(14) 
O41 0.0153(15) 0.0101(18) 0.0141(16) -0.0002(13) 0.0000(13) -0.0009(14) 
O42 0.0174(15) 0.0161(19) 0.0129(16) -0.0009(14) -0.0010(13) 0.0005(15) 
O51 0.0144(15) 0.020(2) 0.0135(15) 0.0010(13) 0.0049(12) 0.0022(14) 
O52 0.0118(15) 0.0206(19) 0.0111(16) 0.0014(14) -0.0010(13) -0.0033(14) 
O61 0.0140(15) 0.0152(18) 0.0136(16) 0.0000(14) -0.0001(13) -0.0034(14) 
O62 0.0104(15) 0.0184(19) 0.0184(16) -0.0023(14) 0.0028(13) -0.0025(15) 
N101 0.0154(19) 0.017(2) 0.0130(19) -0.0019(17) 0.0027(16) 0.0039(18) 
N201 0.0158(19) 0.015(2) 0.0129(19) 0.0010(17) 0.0032(16) 0.0015(18) 
N301 0.018(2) 0.014(2) 0.022(2) -0.0043(17) 0.0099(17) -0.0013(18) 
C10 0.016(2) 0.014(3) 0.015(2) 0.001(2) 0.0083(19) 0.008(2) 
C13 0.021(2) 0.015(3) 0.012(2) 0.003(2) 0.0047(19) -0.004(2) 
C14 0.017(2) 0.024(3) 0.026(3) 0.003(2) 0.001(2) -0.002(2) 
C15 0.028(2) 0.031(3) 0.017(2) 0.001(2) 0.005(2) 0.003(3) 
C16 0.023(2) 0.023(3) 0.019(2) 0.001(2) 0.0015(19) 0.003(3) 
C20 0.009(2) 0.016(3) 0.011(2) 0.005(2) -0.0035(17) 0.001(2) 
C23 0.021(2) 0.018(3) 0.014(2) 0.002(2) 0.006(2) 0.003(2) 
C24 0.035(3) 0.029(3) 0.026(3) -0.006(2) 0.009(2) 0.000(3) 
C25 0.034(3) 0.020(3) 0.042(3) -0.003(3) 0.021(2) 0.000(3) 
C26 0.021(3) 0.024(3) 0.026(3) -0.003(2) 0.006(2) 0.007(2) 
C30 0.007(2) 0.019(3) 0.013(2) -0.006(2) -0.0027(17) -0.005(2) 
C33 0.016(2) 0.012(3) 0.021(2) -0.001(2) 0.0077(19) 0.000(2) 
C34 0.035(3) 0.020(3) 0.024(2) 0.005(2) 0.013(2) 0.003(3) 
C35 0.027(3) 0.028(3) 0.032(3) -0.001(3) 0.009(2) -0.009(3) 
C36 0.024(2) 0.020(3) 0.018(2) 0.000(2) 0.0069(19) -0.001(2) 
C40 0.018(2) 0.016(3) 0.015(2) -0.001(2) 0.0055(19) 0.003(2) 
C43 0.024(2) 0.011(3) 0.020(3) -0.004(2) -0.005(2) 0.005(2) 
C44 0.021(3) 0.028(3) 0.040(3) -0.012(3) 0.005(2) -0.002(3) 
C45 0.036(3) 0.033(3) 0.023(3) -0.007(3) -0.009(2) 0.002(3) 
C46 0.039(3) 0.016(3) 0.018(3) -0.005(2) 0.002(2) 0.002(3) 
C50 0.019(2) 0.005(2) 0.020(2) -0.0007(19) 0.008(2) 0.006(2) 
C53 0.018(2) 0.015(3) 0.013(2) 0.004(2) 0.0050(19) -0.001(2) 
C54 0.043(3) 0.032(3) 0.026(3) -0.009(2) 0.019(2) -0.012(3) 
C55 0.027(3) 0.030(3) 0.020(3) 0.006(2) 0.008(2) 0.001(3) 
C56 0.024(3) 0.051(4) 0.017(2) 0.013(3) 0.006(2) 0.013(3) 
C60 0.021(2) 0.009(3) 0.012(2) 0.0024(19) 0.007(2) -0.002(2) 
C63 0.017(2) 0.012(3) 0.019(2) 0.002(2) 0.006(2) 0.004(2) 
C64 0.018(2) 0.020(3) 0.013(2) -0.002(2) 0.0029(19) -0.002(2) 
C65 0.019(2) 0.014(3) 0.024(3) 0.001(2) 0.002(2) 0.001(2) 
C66 0.020(2) 0.023(3) 0.022(3) -0.002(2) 0.005(2) 0.001(2) 
C102 0.020(2) 0.020(3) 0.014(2) 0.000(2) 0.0016(19) 0.009(2) 
C103 0.015(2) 0.030(3) 0.015(2) 0.001(2) 0.0039(19) 0.002(2) 
C104 0.028(3) 0.032(3) 0.016(2) -0.002(2) 0.011(2) -0.010(3) 
C105 0.020(2) 0.021(3) 0.016(2) 0.005(2) 0.003(2) 0.002(2) 
C106 0.018(2) 0.015(3) 0.015(2) 0.003(2) 0.004(2) -0.003(2) 
C202 0.017(2) 0.017(3) 0.014(2) 0.002(2) 0.0033(19) 0.005(2) 
C203 0.020(2) 0.012(3) 0.019(2) -0.001(2) 0.006(2) -0.006(2) 
C204 0.028(3) 0.007(2) 0.017(2) 0.001(2) 0.009(2) 0.000(2) 
C205 0.020(2) 0.012(3) 0.016(2) 0.003(2) 0.0048(19) 0.007(2) 
C206 0.017(2) 0.018(3) 0.011(2) -0.001(2) 0.0030(19) -0.002(2) 
C302 0.021(2) 0.011(3) 0.023(3) -0.001(2) 0.007(2) -0.002(2) 
C303 0.025(3) 0.020(3) 0.021(3) -0.001(2) 0.005(2) 0.003(2) 
C304 0.020(2) 0.024(3) 0.028(3) -0.006(2) 0.001(2) 0.004(2) 
C305 0.024(3) 0.020(3) 0.034(3) -0.002(2) 0.008(2) -0.007(2) 
C306 0.023(2) 0.015(3) 0.025(2) 0.000(2) 0.0072(19) 0.002(3) 
 
_geom_special_details 
; 
 All esds (except the esd in the dihedral angle between two l.s. planes) 
 are estimated using the full covariance matrix.  The cell esds are taken 
 into account individually in the estimation of esds in distances, angles 
 and torsion angles; correlations between esds in cell parameters are only 
 used when they are defined by crystal symmetry.  An approximate (isotropic) 
 treatment of cell esds is used for estimating esds involving l.s. planes. 
; 
 
loop_ 
 _geom_bond_atom_site_label_1 
 _geom_bond_atom_site_label_2 
 _geom_bond_distance 
 _geom_bond_site_symmetry_2 
 _geom_bond_publ_flag 
Fe1 O1 2.037(3) . ? 
Fe1 O52 2.077(3) . ? 
Fe1 O11 2.083(3) . ? 
Fe1 O62 2.133(3) . ? 
Fe1 O21 2.150(3) . ? 
Fe1 N101 2.190(4) . ? 
Fe1 Fe2 3.3132(10) . ? 
Fe1 Fe3 3.3611(11) . ? 
Fe2 O1 1.827(3) . ? 
Fe2 O22 2.000(3) . ? 
Fe2 O12 2.029(3) . ? 
Fe2 O31 2.040(2) . ? 
Fe2 O41 2.064(3) . ? 
Fe2 N201 2.230(4) . ? 
Fe2 Fe3 3.2380(10) . ? 
Fe3 O1 1.859(3) . ? 
Fe3 O61 2.014(3) . ? 
Fe3 O51 2.028(3) . ? 
Fe3 O42 2.054(3) . ? 
Fe3 O32 2.081(3) . ? 
Fe3 N301 2.231(4) . ? 
O11 C10 1.253(5) . ? 
O12 C10 1.265(5) . ? 
O22 C20 1.264(5) . ? 
O21 C20 1.247(6) . ? 
O31 C30 1.257(5) . ? 
O32 C30 1.271(5) . ? 
O41 C40 1.269(5) . ? 
O42 C40 1.258(5) . ? 
O51 C50 1.267(5) . ? 
O52 C50 1.253(5) . ? 
O61 C60 1.281(5) . ? 
O62 C60 1.245(5) . ? 
N101 C102 1.341(5) . ? 
N101 C106 1.351(6) . ? 
N201 C202 1.348(5) . ? 
N201 C206 1.350(5) . ? 
N301 C306 1.339(5) . ? 
N301 C302 1.345(6) . ? 
C10 C13 1.553(6) . ? 
C13 C16 1.515(6) . ? 
C13 C14 1.530(6) . ? 
C13 C15 1.532(7) . ? 
C20 C23 1.544(6) . ? 
C23 C25 1.516(6) . ? 
C23 C24 1.522(6) . ? 
C23 C26 1.534(6) . ? 
C30 C33 1.536(5) . ? 
C33 C36 1.523(6) . ? 
C33 C34 1.529(6) . ? 
C33 C35 1.544(6) . ? 
C40 C43 1.524(6) . ? 
C43 C44 1.525(7) . ? 
C43 C46 1.527(6) . ? 
C43 C45 1.535(6) . ? 
C50 C53 1.534(6) . ? 
C53 C55 1.519(6) . ? 
C53 C56 1.532(6) . ? 
C53 C54 1.546(6) . ? 
C60 C63 1.533(6) . ? 
C63 C65 1.521(6) . ? 
C63 C66 1.523(6) . ? 
C63 C64 1.535(6) . ? 
C102 C103 1.380(6) . ? 
C103 C104 1.361(7) . ? 
C104 C105 1.378(6) . ? 
C105 C106 1.386(6) . ? 
C202 C203 1.386(6) . ? 
C203 C204 1.373(6) . ? 
C204 C205 1.381(6) . ? 
C205 C206 1.383(6) . ? 
C302 C303 1.389(6) . ? 
C303 C304 1.370(6) . ? 
C304 C305 1.386(7) . ? 
C305 C306 1.396(6) . ? 
 
loop_ 
 _geom_angle_atom_site_label_1 
 _geom_angle_atom_site_label_2 
 _geom_angle_atom_site_label_3 
 _geom_angle 
 _geom_angle_site_symmetry_1 
 _geom_angle_site_symmetry_3 
 _geom_angle_publ_flag 
O1 Fe1 O52 91.94(11) . . ? 
O1 Fe1 O11 94.73(11) . . ? 
O52 Fe1 O11 173.19(11) . . ? 
O1 Fe1 O62 89.97(11) . . ? 
O52 Fe1 O62 92.69(12) . . ? 
O11 Fe1 O62 88.72(11) . . ? 
O1 Fe1 O21 93.21(11) . . ? 
O52 Fe1 O21 88.82(11) . . ? 
O11 Fe1 O21 89.41(11) . . ? 
O62 Fe1 O21 176.43(11) . . ? 
O1 Fe1 N101 174.40(13) . . ? 
O52 Fe1 N101 83.35(12) . . ? 
O11 Fe1 N101 90.07(12) . . ? 
O62 Fe1 N101 87.25(12) . . ? 
O21 Fe1 N101 89.72(12) . . ? 
O1 Fe1 Fe2 29.16(8) . . ? 
O52 Fe1 Fe2 113.61(8) . . ? 
O11 Fe1 Fe2 72.22(8) . . ? 
O62 Fe1 Fe2 107.31(8) . . ? 
O21 Fe1 Fe2 74.97(8) . . ? 
N101 Fe1 Fe2 156.37(10) . . ? 
O1 Fe1 Fe3 28.88(8) . . ? 
O52 Fe1 Fe3 69.85(8) . . ? 
O11 Fe1 Fe3 116.91(8) . . ? 
O62 Fe1 Fe3 73.28(8) . . ? 
O21 Fe1 Fe3 110.29(8) . . ? 
N101 Fe1 Fe3 145.55(10) . . ? 
Fe2 Fe1 Fe3 58.039(19) . . ? 
O1 Fe2 O22 99.17(12) . . ? 
O1 Fe2 O12 96.69(13) . . ? 
O22 Fe2 O12 90.41(12) . . ? 
O1 Fe2 O31 94.61(12) . . ? 
O22 Fe2 O31 166.20(13) . . ? 
O12 Fe2 O31 88.72(11) . . ? 
O1 Fe2 O41 96.29(12) . . ? 
O22 Fe2 O41 88.05(11) . . ? 
O12 Fe2 O41 167.01(12) . . ? 
O31 Fe2 O41 89.70(11) . . ? 
O1 Fe2 N201 177.22(12) . . ? 
O22 Fe2 N201 83.49(12) . . ? 
O12 Fe2 N201 84.05(13) . . ? 
O31 Fe2 N201 82.72(12) . . ? 
O41 Fe2 N201 82.96(12) . . ? 
O1 Fe2 Fe3 28.82(8) . . ? 
O22 Fe2 Fe3 120.17(9) . . ? 
O12 Fe2 Fe3 113.71(9) . . ? 
O31 Fe2 Fe3 72.53(9) . . ? 
O41 Fe2 Fe3 78.01(8) . . ? 
N201 Fe2 Fe3 148.61(9) . . ? 
O1 Fe2 Fe1 32.90(8) . . ? 
O22 Fe2 Fe1 73.58(9) . . ? 
O12 Fe2 Fe1 76.65(9) . . ? 
O31 Fe2 Fe1 119.50(10) . . ? 
O41 Fe2 Fe1 115.15(8) . . ? 
N201 Fe2 Fe1 149.66(9) . . ? 
Fe3 Fe2 Fe1 61.72(2) . . ? 
O1 Fe3 O61 98.27(13) . . ? 
O1 Fe3 O51 95.24(11) . . ? 
O61 Fe3 O51 94.39(12) . . ? 
O1 Fe3 O42 95.34(13) . . ? 
O61 Fe3 O42 165.92(12) . . ? 
O51 Fe3 O42 87.93(12) . . ? 
O1 Fe3 O32 95.15(12) . . ? 
O61 Fe3 O32 86.89(11) . . ? 
O51 Fe3 O32 169.24(11) . . ? 
O42 Fe3 O32 88.31(11) . . ? 
O1 Fe3 N301 175.41(13) . . ? 
O61 Fe3 N301 85.65(13) . . ? 
O51 Fe3 N301 82.04(12) . . ? 
O42 Fe3 N301 80.91(13) . . ? 
O32 Fe3 N301 87.41(12) . . ? 
O1 Fe3 Fe2 28.29(9) . . ? 
O61 Fe3 Fe2 119.37(9) . . ? 
O51 Fe3 Fe2 110.10(8) . . ? 
O42 Fe3 Fe2 72.41(9) . . ? 
O32 Fe3 Fe2 78.27(8) . . ? 
N301 Fe3 Fe2 149.89(10) . . ? 
O1 Fe3 Fe1 31.95(9) . . ? 
O61 Fe3 Fe1 73.93(8) . . ? 
O51 Fe3 Fe1 76.93(8) . . ? 
O42 Fe3 Fe1 120.07(8) . . ? 
O32 Fe3 Fe1 113.62(8) . . ? 
N301 Fe3 Fe1 149.21(10) . . ? 
Fe2 Fe3 Fe1 60.24(2) . . ? 
Fe2 O1 Fe3 122.89(15) . . ? 
Fe2 O1 Fe1 117.94(14) . . ? 
Fe3 O1 Fe1 119.17(15) . . ? 
C10 O11 Fe1 131.4(3) . . ? 
C10 O12 Fe2 128.4(3) . . ? 
C20 O22 Fe2 133.9(3) . . ? 
C20 O21 Fe1 126.5(3) . . ? 
C30 O31 Fe2 132.8(3) . . ? 
C30 O32 Fe3 124.9(3) . . ? 
C40 O41 Fe2 125.7(3) . . ? 
C40 O42 Fe3 132.0(3) . . ? 
C50 O51 Fe3 127.4(3) . . ? 
C50 O52 Fe1 132.2(3) . . ? 
C60 O61 Fe3 129.2(3) . . ? 
C60 O62 Fe1 129.0(3) . . ? 
C102 N101 C106 115.8(4) . . ? 
C102 N101 Fe1 124.6(3) . . ? 
C106 N101 Fe1 119.5(3) . . ? 
C202 N201 C206 117.1(4) . . ? 
C202 N201 Fe2 121.4(3) . . ? 
C206 N201 Fe2 121.5(3) . . ? 
C306 N301 C302 117.0(4) . . ? 
C306 N301 Fe3 122.0(3) . . ? 
C302 N301 Fe3 120.3(3) . . ? 
O11 C10 O12 126.9(4) . . ? 
O11 C10 C13 116.4(4) . . ? 
O12 C10 C13 116.6(4) . . ? 
C16 C13 C14 110.2(4) . . ? 
C16 C13 C15 110.8(3) . . ? 
C14 C13 C15 109.3(4) . . ? 
C16 C13 C10 111.0(4) . . ? 
C14 C13 C10 109.2(3) . . ? 
C15 C13 C10 106.1(4) . . ? 
O21 C20 O22 126.3(4) . . ? 
O21 C20 C23 119.5(4) . . ? 
O22 C20 C23 114.2(4) . . ? 
C25 C23 C24 109.7(4) . . ? 
C25 C23 C26 110.2(4) . . ? 
C24 C23 C26 109.5(4) . . ? 
C25 C23 C20 111.8(4) . . ? 
C24 C23 C20 107.7(4) . . ? 
C26 C23 C20 107.9(3) . . ? 
O31 C30 O32 125.6(4) . . ? 
O31 C30 C33 116.4(4) . . ? 
O32 C30 C33 117.8(4) . . ? 
C36 C33 C34 111.0(4) . . ? 
C36 C33 C30 110.9(4) . . ? 
C34 C33 C30 110.3(3) . . ? 
C36 C33 C35 109.7(4) . . ? 
C34 C33 C35 109.6(4) . . ? 
C30 C33 C35 105.2(3) . . ? 
O42 C40 O41 125.4(4) . . ? 
O42 C40 C43 117.8(4) . . ? 
O41 C40 C43 116.8(4) . . ? 
C40 C43 C44 106.5(4) . . ? 
C40 C43 C46 109.6(4) . . ? 
C44 C43 C46 110.7(4) . . ? 
C40 C43 C45 110.4(4) . . ? 
C44 C43 C45 110.3(4) . . ? 
C46 C43 C45 109.2(4) . . ? 
O52 C50 O51 125.7(4) . . ? 
O52 C50 C53 118.4(4) . . ? 
O51 C50 C53 116.0(4) . . ? 
C55 C53 C56 111.0(4) . . ? 
C55 C53 C50 110.4(4) . . ? 
C56 C53 C50 110.0(3) . . ? 
C55 C53 C54 110.0(4) . . ? 
C56 C53 C54 109.5(4) . . ? 
C50 C53 C54 105.9(4) . . ? 
O62 C60 O61 126.3(4) . . ? 
O62 C60 C63 116.8(4) . . ? 
O61 C60 C63 116.8(4) . . ? 
C65 C63 C66 109.1(4) . . ? 
C65 C63 C60 108.0(3) . . ? 
C66 C63 C60 111.7(4) . . ? 
C65 C63 C64 110.0(4) . . ? 
C66 C63 C64 109.5(3) . . ? 
C60 C63 C64 108.5(4) . . ? 
N101 C102 C103 123.9(5) . . ? 
C104 C103 C102 119.1(4) . . ? 
C103 C104 C105 119.2(5) . . ? 
C104 C105 C106 118.3(5) . . ? 
N101 C106 C105 123.7(4) . . ? 
N201 C202 C203 122.4(4) . . ? 
C204 C203 C202 119.7(4) . . ? 
C203 C204 C205 118.9(4) . . ? 
C204 C205 C206 118.5(4) . . ? 
N201 C206 C205 123.5(4) . . ? 
N301 C302 C303 124.1(4) . . ? 
C304 C303 C302 117.8(5) . . ? 
C303 C304 C305 119.7(5) . . ? 
C304 C305 C306 118.5(4) . . ? 
N301 C306 C305 122.8(5) . . ? 
 
_diffrn_measured_fraction_theta_max    0.819 
_diffrn_reflns_theta_full              26.37 
_diffrn_measured_fraction_theta_full   0.819 
_refine_diff_density_max    0.322 
_refine_diff_density_min   -0.437 
_refine_diff_density_rms    0.065 
#===END
  
data_fe602s 
  
_audit_creation_method            SHELXL-97 
_chemical_name_systematic 
; 
 ? 
; 
_chemical_name_common             ? 
_chemical_melting_point           ? 
_chemical_formula_moiety          ? 
_chemical_formula_sum 
 'C45 H69 Fe3 N3 O13' 
_chemical_formula_weight          1027.58 
  
loop_ 
 _atom_type_symbol 
 _atom_type_description 
 _atom_type_scat_dispersion_real 
 _atom_type_scat_dispersion_imag 
 _atom_type_scat_source 
 'C'  'C'   0.0015   0.0009 
 'International Tables Vol C Tables 4.2.6.8 and 6.1.1.4' 
 'H'  'H'   0.0000   0.0000 
 'International Tables Vol C Tables 4.2.6.8 and 6.1.1.4' 
 'N'  'N'   0.0030   0.0019 
 'International Tables Vol C Tables 4.2.6.8 and 6.1.1.4' 
 'O'  'O'   0.0056   0.0036 
 'International Tables Vol C Tables 4.2.6.8 and 6.1.1.4' 
 'Fe'  'Fe'   0.2886   0.5448 
 'International Tables Vol C Tables 4.2.6.8 and 6.1.1.4' 
  
_symmetry_cell_setting            monoclinic 
_symmetry_space_group_name_H-M    P2(1)
  
loop_ 
 _symmetry_equiv_pos_as_xyz 
 'x, y, z' 
 '-x, y+1/2, -z' 
  
_cell_length_a                    11.588(3) 
_cell_length_b                    19.709(4) 
_cell_length_c                    11.875(3) 
_cell_angle_alpha                 90.00 
_cell_angle_beta                  106.9600(10) 
_cell_angle_gamma                 90.00 
_cell_volume                      2594.2(11) 
_cell_formula_units_Z             2 
_cell_measurement_temperature     60(2) 
_cell_measurement_reflns_used     26 
_cell_measurement_theta_min       30
_cell_measurement_theta_max       36.5
  
_exptl_crystal_description        'irregular block' 
_exptl_crystal_colour             'red brown'
_exptl_crystal_size_max          0.35 
_exptl_crystal_size_mid           0.24
_exptl_crystal_size_min           0.24
_exptl_crystal_density_meas       ? 
_exptl_crystal_density_diffrn     1.316 
_exptl_crystal_density_method     'not measured' 
_exptl_crystal_F_000              1084 
_exptl_absorpt_coefficient_mu     0.466 
_exptl_absorpt_correction_type    integration 
_exptl_absorpt_correction_T_min   0.894
_exptl_absorpt_correction_T_max   0.916
_exptl_absorpt_process_details    'need ref here ABSORB ()' 
  
_exptl_special_details 
; 
 ? 
; 
  
_diffrn_ambient_temperature       60(2) 
_diffrn_radiation_wavelength      0.56080 
_diffrn_radiation_type            AgK\a 
_diffrn_radiation_source          'fine-focus sealed tube' 
_diffrn_radiation_monochromator   graphite 
_diffrn_measurement_device_type  'Huber' 
_diffrn_measurement_method        '/q-2/w scans'
_diffrn_detector_area_resol_mean  ? 
_diffrn_standards_number          ? 
_diffrn_standards_interval_count  ? 
_diffrn_standards_interval_time   ? 
_diffrn_standards_decay_%         ? 
_diffrn_reflns_number            7393 
_diffrn_reflns_av_R_equivalents   0.08 
_diffrn_reflns_av_sigmaI/netI     0.1252 
_diffrn_reflns_limit_h_min        -14 
_diffrn_reflns_limit_h_max        14 
_diffrn_reflns_limit_k_min        0 
_diffrn_reflns_limit_k_max        24 
_diffrn_reflns_limit_l_min        0 
_diffrn_reflns_limit_l_max        15 
_diffrn_reflns_theta_min          1.70 
_diffrn_reflns_theta_max          20.81 
_reflns_number_total              5673 
_reflns_number_gt                 4733 
_reflns_threshold_expression      >2sigma(I) 
  
_computing_data_collection       'MAD (Allibon)'
_computing_cell_refinement        'MAD (Allibon)'
_computing_data_reduction         'KRYSTAL (Hazell)'
_computing_structure_solution     'SHELXS-97 (Sheldrick, 1990)' 
_computing_structure_refinement   'SHELXL-97 (Sheldrick, 1997)' 
_computing_molecular_graphics     ? 
_computing_publication_material   ? 
  
_refine_special_details 
; 
 Refinement of F^2^ against ALL reflections.  The weighted R-factor wR and 
 goodness of fit S are based on F^2^, conventional R-factors R are based 
 on F, with F set to zero for negative F^2^. The threshold expression of 
 F^2^ > 2sigma(F^2^) is used only for calculating R-factors(gt) etc. and is 
 not relevant to the choice of reflections for refinement.  R-factors based 
 on F^2^ are statistically about twice as large as those based on F, and R- 
 factors based on ALL data will be even larger. 
; 
  
_refine_ls_structure_factor_coef  Fsqd 
_refine_ls_matrix_type            full 
_refine_ls_weighting_scheme       calc 
_refine_ls_weighting_details 
 'calc w=1/[\s^2^(Fo^2^)+(0.0000P)^2^+2.0000P] where P=(Fo^2^+2Fc^2^)/3' 
_atom_sites_solution_primary      direct 
_atom_sites_solution_secondary    difmap 
_atom_sites_solution_hydrogens    geom 
_refine_ls_hydrogen_treatment     noref
_refine_ls_extinction_method      none 
_refine_ls_extinction_coef        ? 
_refine_ls_abs_structure_details 
 'Flack H D (1983), Acta Cryst. A39, 876-881' 
_refine_ls_abs_structure_Flack    -0.01(5) 
_refine_ls_number_reflns          5673 
_refine_ls_number_parameters      577 
_refine_ls_number_restraints      1 
_refine_ls_R_factor_all           0.0834 
_refine_ls_R_factor_gt            0.0685 
_refine_ls_wR_factor_ref          0.1695 
_refine_ls_wR_factor_gt           0.1618 
_refine_ls_goodness_of_fit_ref    1.218 
_refine_ls_restrained_S_all       1.218 
_refine_ls_shift/su_max           0.002 
_refine_ls_shift/su_mean          0.000 
  
loop_ 
 _atom_site_label 
 _atom_site_type_symbol 
 _atom_site_fract_x 
 _atom_site_fract_y 
 _atom_site_fract_z 
 _atom_site_U_iso_or_equiv 
 _atom_site_adp_type 
 _atom_site_occupancy 
 _atom_site_symmetry_multiplicity 
 _atom_site_calc_flag 
 _atom_site_refinement_flags 
 _atom_site_disorder_assembly 
 _atom_site_disorder_group 
Fe1 Fe 0.89074(12) 0.17559(6) 0.26612(10) 0.0244(3) Uani 1 1 d . . . 
Fe2 Fe 0.75141(11) 0.03362(6) 0.29539(10) 0.0219(3) Uani 1 1 d . . . 
Fe3 Fe 0.58887(12) 0.16476(5) 0.18184(10) 0.0245(3) Uani 1 1 d . . . 
O1 O 0.7400(5) 0.1227(3) 0.2462(5) 0.0208(11) Uani 1 1 d . . . 
O11 O 0.9821(6) 0.1343(3) 0.4266(5) 0.0296(13) Uani 1 1 d . . . 
O12 O 0.8654(5) 0.0495(3) 0.4596(5) 0.0267(13) Uani 1 1 d . . . 
O22 O 0.8916(6) 0.0065(3) 0.2396(5) 0.0267(12) Uani 1 1 d . . . 
O21 O 0.9676(6) 0.0999(3) 0.1822(6) 0.0303(13) Uani 1 1 d . . . 
O31 O 0.6116(5) 0.0378(3) 0.3644(5) 0.0278(12) Uani 1 1 d . . . 
O32 O 0.5209(6) 0.1390(3) 0.3205(5) 0.0279(13) Uani 1 1 d . . . 
O41 O 0.6407(6) -0.0055(3) 0.1427(5) 0.0287(13) Uani 1 1 d . . . 
O42 O 0.5097(6) 0.0801(3) 0.0937(6) 0.0299(14) Uani 1 1 d . . . 
O51 O 0.6290(5) 0.1936(3) 0.0311(5) 0.0257(12) Uani 1 1 d . . . 
O52 O 0.8229(5) 0.2218(3) 0.1056(5) 0.0265(13) Uani 1 1 d . . . 
O61 O 0.6323(6) 0.2551(3) 0.2613(5) 0.0257(12) Uani 1 1 d . . . 
O62 O 0.8295(5) 0.2528(3) 0.3561(6) 0.0269(12) Uani 1 1 d . . . 
N101 N 1.0481(6) 0.2405(4) 0.2737(6) 0.0229(14) Uani 1 1 d . . . 
N201 N 0.7591(7) -0.0748(4) 0.3560(6) 0.0258(15) Uani 1 1 d . . . 
N301 N 0.4110(7) 0.2106(4) 0.0888(6) 0.0284(16) Uani 1 1 d . . . 
C10 C 0.9525(7) 0.0911(4) 0.4908(6) 0.0219(15) Uani 1 1 d . . . 
C13 C 1.0236(8) 0.0901(4) 0.6214(8) 0.0285(18) Uani 1 1 d . . . 
C14 C 1.1593(9) 0.0927(6) 0.6312(10) 0.042(2) Uani 1 1 d . . . 
H14A H 1.1755 0.1321 0.5906 0.063 Uiso 1 1 calc R . . 
H14B H 1.1814 0.0526 0.5964 0.063 Uiso 1 1 calc R . . 
H14C H 1.2055 0.0951 0.7126 0.063 Uiso 1 1 calc R . . 
C15 C 0.9929(12) 0.1561(6) 0.6746(8) 0.049(3) Uani 1 1 d . . . 
H15A H 1.0122 0.1941 0.6330 0.074 Uiso 1 1 calc R . . 
H15B H 1.0388 0.1587 0.7561 0.074 Uiso 1 1 calc R . . 
H15C H 0.9083 0.1568 0.6681 0.074 Uiso 1 1 calc R . . 
C16 C 0.9942(9) 0.0281(6) 0.6850(8) 0.040(2) Uani 1 1 d . . . 
H16A H 1.0407 0.0296 0.7664 0.060 Uiso 1 1 calc R . . 
H16B H 1.0137 -0.0124 0.6495 0.060 Uiso 1 1 calc R . . 
H16C H 0.9098 0.0281 0.6792 0.060 Uiso 1 1 calc R . . 
C20 C 0.9566(6) 0.0364(5) 0.1864(6) 0.0212(14) Uani 1 1 d . . . 
C23 C 1.0248(9) -0.0093(4) 0.1229(8) 0.0300(19) Uani 1 1 d . . . 
C24 C 0.9324(11) -0.0493(7) 0.0291(11) 0.050(3) Uani 1 1 d . . . 
H24A H 0.8821 -0.0748 0.0652 0.075 Uiso 1 1 calc R . . 
H24B H 0.9732 -0.0798 -0.0094 0.075 Uiso 1 1 calc R . . 
H24C H 0.8834 -0.0186 -0.0277 0.075 Uiso 1 1 calc R . . 
C25 C 1.1035(12) 0.0307(7) 0.0652(12) 0.056(3) Uani 1 1 d . . . 
H25A H 1.1621 0.0560 0.1240 0.084 Uiso 1 1 calc R . . 
H25B H 1.0543 0.0613 0.0083 0.084 Uiso 1 1 calc R . . 
H25C H 1.1442 0.0001 0.0266 0.084 Uiso 1 1 calc R . . 
C26 C 1.1018(10) -0.0590(6) 0.2153(11) 0.044(3) Uani 1 1 d . . . 
H26A H 1.0505 -0.0839 0.2510 0.066 Uiso 1 1 calc R . . 
H26B H 1.1602 -0.0339 0.2747 0.066 Uiso 1 1 calc R . . 
H26C H 1.1427 -0.0900 0.1776 0.066 Uiso 1 1 calc R . . 
C30 C 0.5462(7) 0.0850(4) 0.3794(7) 0.0249(17) Uani 1 1 d . . . 
C33 C 0.4894(9) 0.0768(4) 0.4816(8) 0.0292(18) Uani 1 1 d . . . 
C34 C 0.5683(11) 0.0290(6) 0.5760(8) 0.044(2) Uani 1 1 d . . . 
H34A H 0.5804 -0.0129 0.5399 0.067 Uiso 1 1 calc R . . 
H34B H 0.5287 0.0202 0.6351 0.067 Uiso 1 1 calc R . . 
H34C H 0.6449 0.0501 0.6118 0.067 Uiso 1 1 calc R . . 
C35 C 0.3670(9) 0.0419(6) 0.4236(11) 0.046(3) Uani 1 1 d . . . 
H35A H 0.3806 -0.0007 0.3902 0.068 Uiso 1 1 calc R . . 
H35B H 0.3185 0.0705 0.3626 0.068 Uiso 1 1 calc R . . 
H35C H 0.3259 0.0340 0.4818 0.068 Uiso 1 1 calc R . . 
C36 C 0.4676(10) 0.1435(5) 0.5340(9) 0.039(2) Uani 1 1 d . . . 
H36A H 0.4184 0.1720 0.4731 0.059 Uiso 1 1 calc R . . 
H36B H 0.5434 0.1655 0.5694 0.059 Uiso 1 1 calc R . . 
H36C H 0.4272 0.1356 0.5927 0.059 Uiso 1 1 calc R . . 
C40 C 0.5500(8) 0.0233(4) 0.0756(8) 0.0275(17) Uani 1 1 d . . . 
C43 C 0.4807(9) -0.0161(5) -0.0325(9) 0.039(2) Uani 1 1 d . . . 
C44 C 0.4221(10) -0.0772(6) 0.0093(12) 0.048(3) Uani 1 1 d . . . 
H44A H 0.3774 -0.1032 -0.0577 0.073 Uiso 1 1 calc R . . 
H44B H 0.3686 -0.0616 0.0521 0.073 Uiso 1 1 calc R . . 
H44C H 0.4838 -0.1052 0.0596 0.073 Uiso 1 1 calc R . . 
C45 C 0.3828(13) 0.0307(7) -0.1158(10) 0.066(4) Uani 1 1 d . . . 
H45A H 0.3392 0.0054 -0.1841 0.098 Uiso 1 1 calc R . . 
H45B H 0.4215 0.0689 -0.1397 0.098 Uiso 1 1 calc R . . 
H45C H 0.3278 0.0464 -0.0747 0.098 Uiso 1 1 calc R . . 
C46 C 0.5688(12) -0.0391(5) -0.0997(9) 0.045(3) Uani 1 1 d . . . 
H46A H 0.5256 -0.0641 -0.1685 0.068 Uiso 1 1 calc R . . 
H46B H 0.6299 -0.0674 -0.0498 0.068 Uiso 1 1 calc R . . 
H46C H 0.6058 0.0000 -0.1230 0.068 Uiso 1 1 calc R . . 
C50 C 0.7306(7) 0.2119(4) 0.0226(7) 0.0208(15) Uani 1 1 d . . . 
C53 C 0.7392(8) 0.2213(5) -0.1032(8) 0.0303(19) Uani 1 1 d . . . 
C54 C 0.7363(14) 0.1485(7) -0.1522(11) 0.058(3) Uani 1 1 d . . . 
H54A H 0.8055 0.1238 -0.1062 0.087 Uiso 1 1 calc R . . 
H54B H 0.7375 0.1503 -0.2326 0.087 Uiso 1 1 calc R . . 
H54C H 0.6642 0.1260 -0.1481 0.087 Uiso 1 1 calc R . . 
C55 C 0.8572(9) 0.2556(7) -0.1030(8) 0.046(3) Uani 1 1 d . . . 
H55A H 0.9239 0.2295 -0.0560 0.069 Uiso 1 1 calc R . . 
H55B H 0.8599 0.3004 -0.0707 0.069 Uiso 1 1 calc R . . 
H55C H 0.8621 0.2584 -0.1822 0.069 Uiso 1 1 calc R . . 
C56 C 0.6295(11) 0.2600(8) -0.1763(8) 0.058(4) Uani 1 1 d . . . 
H56A H 0.5575 0.2367 -0.1740 0.087 Uiso 1 1 calc R . . 
H56B H 0.6320 0.2629 -0.2562 0.087 Uiso 1 1 calc R . . 
H56C H 0.6298 0.3049 -0.1447 0.087 Uiso 1 1 calc R . . 
C60 C 0.7245(7) 0.2736(4) 0.3415(7) 0.0202(15) Uani 1 1 d . . . 
C63 C 0.7074(7) 0.3267(4) 0.4303(7) 0.0218(16) Uani 1 1 d . . . 
C64 C 0.7665(9) 0.2998(5) 0.5557(7) 0.0290(18) Uani 1 1 d . . . 
H64A H 0.7266 0.2589 0.5675 0.044 Uiso 1 1 calc R . . 
H64B H 0.7594 0.3333 0.6120 0.044 Uiso 1 1 calc R . . 
H64C H 0.8502 0.2905 0.5657 0.044 Uiso 1 1 calc R . . 
C65 C 0.7705(9) 0.3919(5) 0.4109(10) 0.036(2) Uani 1 1 d . . . 
H65A H 0.8543 0.3828 0.4213 0.054 Uiso 1 1 calc R . . 
H65B H 0.7630 0.4256 0.4668 0.054 Uiso 1 1 calc R . . 
H65C H 0.7338 0.4083 0.3325 0.054 Uiso 1 1 calc R . . 
C66 C 0.5734(9) 0.3402(5) 0.4141(9) 0.037(2) Uani 1 1 d . . . 
H66A H 0.5349 0.2989 0.4265 0.055 Uiso 1 1 calc R . . 
H66B H 0.5361 0.3564 0.3357 0.055 Uiso 1 1 calc R . . 
H66C H 0.5653 0.3737 0.4700 0.055 Uiso 1 1 calc R . . 
C102 C 1.1608(9) 0.2165(5) 0.2943(8) 0.036(2) Uani 1 1 d . . . 
H10A H 1.1743 0.1705 0.3098 0.043 Uiso 1 1 calc R . . 
C103 C 1.2569(9) 0.2569(6) 0.2935(9) 0.037(2) Uani 1 1 d . . . 
H10B H 1.3336 0.2383 0.3076 0.044 Uiso 1 1 calc R . . 
C104 C 1.2391(9) 0.3238(6) 0.2721(9) 0.040(2) Uani 1 1 d . . . 
H10C H 1.3031 0.3519 0.2702 0.048 Uiso 1 1 calc R . . 
C105 C 1.1257(9) 0.3499(5) 0.2531(8) 0.035(2) Uani 1 1 d . . . 
H10D H 1.1120 0.3962 0.2410 0.043 Uiso 1 1 calc R . . 
C106 C 1.0328(8) 0.3073(5) 0.2523(8) 0.0291(18) Uani 1 1 d . . . 
H10E H 0.9555 0.3252 0.2361 0.035 Uiso 1 1 calc R . . 
C202 C 0.6588(8) -0.1106(5) 0.3412(8) 0.0297(18) Uani 1 1 d . . . 
H20A H 0.5849 -0.0899 0.3062 0.036 Uiso 1 1 calc R . . 
C203 C 0.6605(9) -0.1783(4) 0.3762(8) 0.0302(19) Uani 1 1 d . . . 
H20B H 0.5892 -0.2024 0.3656 0.036 Uiso 1 1 calc R . . 
C204 C 0.7712(9) -0.2084(4) 0.4272(8) 0.0297(19) Uani 1 1 d . . . 
H20C H 0.7753 -0.2534 0.4519 0.036 Uiso 1 1 calc R . . 
C205 C 0.8751(9) -0.1717(4) 0.4411(8) 0.0286(18) Uani 1 1 d . . . 
H20D H 0.9502 -0.1916 0.4739 0.034 Uiso 1 1 calc R . . 
C206 C 0.8659(8) -0.1038(4) 0.4052(7) 0.0257(17) Uani 1 1 d . . . 
H20E H 0.9358 -0.0783 0.4158 0.031 Uiso 1 1 calc R . . 
C302 C 0.4078(8) 0.2700(5) 0.0332(8) 0.0294(18) Uani 1 1 d . . . 
H30A H 0.4788 0.2946 0.0456 0.035 Uiso 1 1 calc R . . 
C303 C 0.3010(10) 0.2964(5) -0.0433(9) 0.039(2) Uani 1 1 d . . . 
H30B H 0.3021 0.3369 -0.0834 0.047 Uiso 1 1 calc R . . 
C304 C 0.1943(9) 0.2615(6) -0.0581(10) 0.041(2) Uani 1 1 d . . . 
H30C H 0.1218 0.2786 -0.1061 0.050 Uiso 1 1 calc R . . 
C305 C 0.1979(10) 0.2005(5) 0.0004(12) 0.047(3) Uani 1 1 d . . . 
H30D H 0.1277 0.1755 -0.0087 0.056 Uiso 1 1 calc R . . 
C306 C 0.3079(8) 0.1765(5) 0.0732(9) 0.0335(18) Uani 1 1 d . . . 
H30E H 0.3093 0.1355 0.1121 0.040 Uiso 1 1 calc R . . 
  
loop_ 
 _atom_site_aniso_label 
 _atom_site_aniso_U_11 
 _atom_site_aniso_U_22 
 _atom_site_aniso_U_33 
 _atom_site_aniso_U_23 
 _atom_site_aniso_U_13 
 _atom_site_aniso_U_12 
Fe1 0.0363(6) 0.0186(5) 0.0162(5) 0.0014(4) 0.0041(4) 0.0030(5) 
Fe2 0.0271(6) 0.0173(5) 0.0191(5) 0.0005(4) 0.0033(4) -0.0003(5) 
Fe3 0.0357(6) 0.0175(6) 0.0193(5) -0.0018(4) 0.0063(4) -0.0049(5) 
O1 0.031(3) 0.010(2) 0.019(3) -0.0008(19) 0.004(2) 0.000(2) 
O11 0.033(3) 0.026(3) 0.025(3) 0.004(2) 0.001(2) -0.002(3) 
O12 0.028(3) 0.030(3) 0.016(2) 0.002(2) -0.002(2) -0.001(2) 
O22 0.028(3) 0.028(3) 0.025(3) 0.004(2) 0.009(2) 0.001(2) 
O21 0.038(3) 0.019(3) 0.034(3) 0.001(2) 0.010(3) -0.003(3) 
O31 0.030(3) 0.017(3) 0.034(3) 0.006(2) 0.005(2) 0.000(3) 
O32 0.032(3) 0.024(3) 0.021(3) 0.003(2) -0.002(2) 0.006(2) 
O41 0.038(3) 0.015(3) 0.026(3) 0.001(2) -0.001(3) 0.003(2) 
O42 0.033(3) 0.020(3) 0.031(3) -0.002(2) 0.002(3) 0.002(2) 
O51 0.024(3) 0.034(3) 0.019(3) 0.002(2) 0.005(2) -0.003(2) 
O52 0.024(3) 0.030(3) 0.020(3) 0.001(2) -0.002(2) -0.005(2) 
O61 0.030(3) 0.017(3) 0.025(3) -0.003(2) 0.000(2) -0.002(2) 
O62 0.022(3) 0.028(3) 0.031(3) 0.001(3) 0.008(2) 0.000(2) 
N101 0.025(3) 0.023(3) 0.021(3) -0.002(3) 0.007(3) 0.003(3) 
N201 0.032(4) 0.017(3) 0.026(3) 0.002(3) 0.005(3) -0.004(3) 
N301 0.038(4) 0.023(3) 0.027(3) -0.010(3) 0.014(3) -0.007(3) 
C10 0.030(4) 0.021(4) 0.011(3) 0.000(3) 0.000(3) 0.000(3) 
C13 0.032(4) 0.021(4) 0.030(4) 0.003(3) 0.006(3) 0.003(3) 
C14 0.034(5) 0.040(5) 0.045(6) 0.016(5) 0.001(4) 0.001(4) 
C15 0.070(7) 0.048(6) 0.025(4) -0.005(4) 0.005(4) 0.017(6) 
C16 0.044(5) 0.044(5) 0.026(4) 0.010(4) 0.001(4) -0.007(5) 
C20 0.013(3) 0.026(4) 0.020(3) -0.005(3) -0.003(3) -0.006(3) 
C23 0.041(5) 0.022(4) 0.027(4) 0.001(3) 0.010(4) -0.004(4) 
C24 0.046(6) 0.058(7) 0.043(6) -0.012(5) 0.010(5) -0.005(5) 
C25 0.072(8) 0.039(6) 0.074(8) 0.004(6) 0.046(7) -0.008(6) 
C26 0.040(6) 0.041(6) 0.053(6) 0.006(5) 0.017(5) 0.021(5) 
C30 0.023(4) 0.026(4) 0.023(4) 0.001(3) 0.003(3) -0.009(3) 
C33 0.039(5) 0.020(4) 0.029(4) 0.001(3) 0.011(4) 0.005(3) 
C34 0.064(7) 0.042(5) 0.028(4) 0.004(4) 0.014(4) 0.012(6) 
C35 0.028(5) 0.044(6) 0.069(7) -0.008(5) 0.022(5) -0.007(5) 
C36 0.048(6) 0.036(5) 0.040(5) 0.000(4) 0.024(4) 0.002(4) 
C40 0.032(4) 0.018(4) 0.031(4) 0.002(3) 0.006(3) 0.000(3) 
C43 0.039(5) 0.028(4) 0.031(5) -0.006(4) -0.018(4) 0.005(4) 
C44 0.036(5) 0.039(6) 0.062(7) -0.019(5) 0.001(5) -0.002(5) 
C45 0.081(9) 0.041(6) 0.043(6) -0.024(6) -0.031(6) 0.021(7) 
C46 0.074(8) 0.030(5) 0.025(4) -0.003(4) 0.004(5) 0.017(5) 
C50 0.027(4) 0.016(3) 0.021(4) -0.001(3) 0.009(3) 0.001(3) 
C53 0.026(4) 0.036(5) 0.025(4) 0.004(4) 0.002(3) 0.004(4) 
C54 0.086(10) 0.050(7) 0.048(7) -0.017(5) 0.034(7) 0.004(6) 
C55 0.036(5) 0.079(8) 0.023(4) 0.010(5) 0.008(4) -0.011(5) 
C56 0.054(7) 0.105(11) 0.017(4) 0.022(6) 0.014(4) 0.032(7) 
C60 0.024(4) 0.014(3) 0.019(3) -0.002(3) 0.000(3) -0.002(3) 
C63 0.018(4) 0.019(4) 0.025(4) -0.004(3) 0.001(3) 0.001(3) 
C64 0.039(5) 0.033(4) 0.016(4) 0.000(3) 0.010(3) -0.004(4) 
C65 0.039(5) 0.021(4) 0.048(6) -0.003(4) 0.012(4) -0.003(4) 
C66 0.028(4) 0.036(5) 0.045(5) -0.011(4) 0.008(4) 0.007(4) 
C102 0.040(5) 0.038(5) 0.024(4) -0.007(4) 0.001(4) 0.009(4) 
C103 0.027(4) 0.050(6) 0.032(5) 0.001(4) 0.004(4) 0.002(4) 
C104 0.030(5) 0.054(6) 0.032(5) 0.002(4) 0.005(4) -0.006(4) 
C105 0.041(5) 0.033(5) 0.029(4) 0.002(4) 0.003(4) -0.013(4) 
C106 0.029(4) 0.028(4) 0.025(4) 0.007(3) 0.000(3) 0.005(3) 
C202 0.031(5) 0.022(4) 0.031(4) 0.002(3) 0.001(4) -0.002(3) 
C203 0.035(5) 0.022(4) 0.028(4) 0.003(3) 0.001(4) -0.005(3) 
C204 0.043(5) 0.020(4) 0.025(4) -0.007(3) 0.009(4) 0.001(4) 
C205 0.034(4) 0.016(4) 0.034(4) 0.009(3) 0.007(4) 0.003(3) 
C206 0.033(4) 0.022(4) 0.022(4) 0.003(3) 0.008(3) -0.002(3) 
C302 0.026(4) 0.025(4) 0.035(5) 0.003(4) 0.007(4) 0.005(3) 
C303 0.040(5) 0.032(5) 0.040(5) 0.009(4) 0.005(4) 0.003(4) 
C304 0.022(4) 0.040(5) 0.053(6) -0.002(5) -0.003(4) -0.001(4) 
C305 0.042(6) 0.022(4) 0.069(7) -0.011(5) 0.004(5) -0.003(4) 
C306 0.026(4) 0.026(4) 0.047(5) -0.003(4) 0.007(4) -0.001(4) 
  
_geom_special_details 
; 
 All esds (except the esd in the dihedral angle between two l.s. planes) 
 are estimated using the full covariance matrix.  The cell esds are taken 
 into account individually in the estimation of esds in distances, angles 
 and torsion angles; correlations between esds in cell parameters are only 
 used when they are defined by crystal symmetry.  An approximate (isotropic) 
 treatment of cell esds is used for estimating esds involving l.s. planes. 
; 
  
loop_ 
 _geom_bond_atom_site_label_1 
 _geom_bond_atom_site_label_2 
 _geom_bond_distance 
 _geom_bond_site_symmetry_2 
 _geom_bond_publ_flag 
Fe1 O1 1.989(6) . ? 
Fe1 O52 2.050(6) . ? 
Fe1 O11 2.058(6) . ? 
Fe1 O62 2.098(6) . ? 
Fe1 O21 2.128(7) . ? 
Fe1 N101 2.208(7) . ? 
Fe1 Fe2 3.2990(17) . ? 
Fe1 Fe3 3.353(2) . ? 
Fe2 O1 1.842(5) . ? 
Fe2 O22 1.998(6) . ? 
Fe2 O31 2.019(6) . ? 
Fe2 O12 2.035(6) . ? 
Fe2 O41 2.042(6) . ? 
Fe2 N201 2.249(7) . ? 
Fe2 Fe3 3.2503(17) . ? 
Fe3 O1 1.886(6) . ? 
Fe3 O61 2.010(6) . ? 
Fe3 O42 2.039(6) . ? 
Fe3 O51 2.057(6) . ? 
Fe3 O32 2.085(7) . ? 
Fe3 N301 2.226(8) . ? 
O11 C10 1.255(11) . ? 
O12 C10 1.269(11) . ? 
O22 C20 1.261(10) . ? 
O21 C20 1.260(12) . ? 
O31 C30 1.246(11) . ? 
O32 C30 1.260(11) . ? 
O41 C40 1.254(11) . ? 
O42 C40 1.256(11) . ? 
O51 C50 1.264(10) . ? 
O52 C50 1.240(10) . ? 
O61 C60 1.260(10) . ? 
O62 C60 1.247(10) . ? 
N101 C106 1.341(12) . ? 
N101 C102 1.343(12) . ? 
N201 C202 1.326(12) . ? 
N201 C206 1.333(12) . ? 
N301 C306 1.335(12) . ? 
N301 C302 1.339(12) . ? 
C10 C13 1.530(11) . ? 
C13 C16 1.526(13) . ? 
C13 C15 1.533(13) . ? 
C13 C14 1.544(13) . ? 
C20 C23 1.535(12) . ? 
C23 C25 1.513(14) . ? 
C23 C24 1.520(14) . ? 
C23 C26 1.545(13) . ? 
C30 C33 1.549(12) . ? 
C33 C36 1.507(13) . ? 
C33 C34 1.543(13) . ? 
C33 C35 1.546(13) . ? 
C40 C43 1.514(12) . ? 
C43 C44 1.535(17) . ? 
C43 C46 1.537(17) . ? 
C43 C45 1.568(13) . ? 
C50 C53 1.538(11) . ? 
C53 C56 1.519(13) . ? 
C53 C55 1.525(14) . ? 
C53 C54 1.545(15) . ? 
C60 C63 1.539(11) . ? 
C63 C65 1.529(12) . ? 
C63 C66 1.532(12) . ? 
C63 C64 1.540(11) . ? 
C102 C103 1.371(15) . ? 
C103 C104 1.348(16) . ? 
C104 C105 1.368(15) . ? 
C105 C106 1.363(13) . ? 
C202 C203 1.395(12) . ? 
C203 C204 1.383(13) . ? 
C204 C205 1.372(13) . ? 
C205 C206 1.399(11) . ? 
C302 C303 1.405(13) . ? 
C303 C304 1.380(15) . ? 
C304 C305 1.384(16) . ? 
C305 C306 1.396(14) . ? 
  
loop_ 
 _geom_angle_atom_site_label_1 
 _geom_angle_atom_site_label_2 
 _geom_angle_atom_site_label_3 
 _geom_angle 
 _geom_angle_site_symmetry_1 
 _geom_angle_site_symmetry_3 
 _geom_angle_publ_flag 
O1 Fe1 O52 92.1(2) . . ? 
O1 Fe1 O11 95.7(2) . . ? 
O52 Fe1 O11 171.9(3) . . ? 
O1 Fe1 O62 91.4(2) . . ? 
O52 Fe1 O62 93.2(3) . . ? 
O11 Fe1 O62 88.5(3) . . ? 
O1 Fe1 O21 92.8(2) . . ? 
O52 Fe1 O21 88.6(3) . . ? 
O11 Fe1 O21 89.1(3) . . ? 
O62 Fe1 O21 175.3(3) . . ? 
O1 Fe1 N101 174.4(3) . . ? 
O52 Fe1 N101 82.5(3) . . ? 
O11 Fe1 N101 89.8(3) . . ? 
O62 Fe1 N101 87.5(2) . . ? 
O21 Fe1 N101 88.4(3) . . ? 
O1 Fe1 Fe2 29.28(16) . . ? 
O52 Fe1 Fe2 114.06(17) . . ? 
O11 Fe1 Fe2 72.70(19) . . ? 
O62 Fe1 Fe2 108.23(18) . . ? 
O21 Fe1 Fe2 74.88(18) . . ? 
N101 Fe1 Fe2 155.65(19) . . ? 
O1 Fe1 Fe3 29.22(16) . . ? 
O52 Fe1 Fe3 70.56(18) . . ? 
O11 Fe1 Fe3 117.5(2) . . ? 
O62 Fe1 Fe3 73.72(17) . . ? 
O21 Fe1 Fe3 110.99(18) . . ? 
N101 Fe1 Fe3 145.72(19) . . ? 
Fe2 Fe1 Fe3 58.49(4) . . ? 
O1 Fe2 O22 98.0(3) . . ? 
O1 Fe2 O31 95.6(3) . . ? 
O22 Fe2 O31 166.4(3) . . ? 
O1 Fe2 O12 97.1(2) . . ? 
O22 Fe2 O12 89.7(3) . . ? 
O31 Fe2 O12 88.8(2) . . ? 
O1 Fe2 O41 96.3(2) . . ? 
O22 Fe2 O41 88.0(3) . . ? 
O31 Fe2 O41 90.3(3) . . ? 
O12 Fe2 O41 166.6(2) . . ? 
O1 Fe2 N201 178.1(3) . . ? 
O22 Fe2 N201 83.8(3) . . ? 
O31 Fe2 N201 82.6(3) . . ? 
O12 Fe2 N201 83.4(3) . . ? 
O41 Fe2 N201 83.2(2) . . ? 
O1 Fe2 Fe3 29.72(19) . . ? 
O22 Fe2 Fe3 120.26(18) . . ? 
O31 Fe2 Fe3 72.50(17) . . ? 
O12 Fe2 Fe3 114.25(18) . . ? 
O41 Fe2 Fe3 78.11(17) . . ? 
N201 Fe2 Fe3 148.5(2) . . ? 
O1 Fe2 Fe1 31.87(19) . . ? 
O22 Fe2 Fe1 73.83(18) . . ? 
O31 Fe2 Fe1 118.91(18) . . ? 
O12 Fe2 Fe1 76.67(18) . . ? 
O41 Fe2 Fe1 115.25(18) . . ? 
N201 Fe2 Fe1 149.9(2) . . ? 
Fe3 Fe2 Fe1 61.58(4) . . ? 
O1 Fe3 O61 97.1(2) . . ? 
O1 Fe3 O42 94.2(2) . . ? 
O61 Fe3 O42 168.3(3) . . ? 
O1 Fe3 O51 93.2(2) . . ? 
O61 Fe3 O51 94.3(3) . . ? 
O42 Fe3 O51 87.8(3) . . ? 
O1 Fe3 O32 95.3(2) . . ? 
O61 Fe3 O32 86.9(3) . . ? 
O42 Fe3 O32 89.4(3) . . ? 
O51 Fe3 O32 171.2(2) . . ? 
O1 Fe3 N301 174.4(3) . . ? 
O61 Fe3 N301 86.7(3) . . ? 
O42 Fe3 N301 82.2(3) . . ? 
O51 Fe3 N301 82.4(3) . . ? 
O32 Fe3 N301 89.0(3) . . ? 
O1 Fe3 Fe2 28.96(17) . . ? 
O61 Fe3 Fe2 118.33(17) . . ? 
O42 Fe3 Fe2 71.48(18) . . ? 
O51 Fe3 Fe2 109.28(18) . . ? 
O32 Fe3 Fe2 77.63(17) . . ? 
N301 Fe3 Fe2 150.4(2) . . ? 
O1 Fe3 Fe1 30.98(17) . . ? 
O61 Fe3 Fe1 72.96(18) . . ? 
O42 Fe3 Fe1 118.65(19) . . ? 
O51 Fe3 Fe1 76.19(17) . . ? 
O32 Fe3 Fe1 112.42(17) . . ? 
N301 Fe3 Fe1 148.9(2) . . ? 
Fe2 Fe3 Fe1 59.93(4) . . ? 
Fe2 O1 Fe3 121.3(3) . . ? 
Fe2 O1 Fe1 118.9(3) . . ? 
Fe3 O1 Fe1 119.8(3) . . ? 
C10 O11 Fe1 132.2(6) . . ? 
C10 O12 Fe2 128.1(5) . . ? 
C20 O22 Fe2 134.7(6) . . ? 
C20 O21 Fe1 128.1(6) . . ? 
C30 O31 Fe2 133.0(6) . . ? 
C30 O32 Fe3 124.3(6) . . ? 
C40 O41 Fe2 125.9(6) . . ? 
C40 O42 Fe3 133.0(6) . . ? 
C50 O51 Fe3 126.9(5) . . ? 
C50 O52 Fe1 132.6(6) . . ? 
C60 O61 Fe3 130.7(5) . . ? 
C60 O62 Fe1 129.0(5) . . ? 
C106 N101 C102 116.6(8) . . ? 
C106 N101 Fe1 119.9(6) . . ? 
C102 N101 Fe1 123.4(6) . . ? 
C202 N201 C206 119.7(8) . . ? 
C202 N201 Fe2 120.7(6) . . ? 
C206 N201 Fe2 119.5(6) . . ? 
C306 N301 C302 118.4(8) . . ? 
C306 N301 Fe3 121.8(6) . . ? 
C302 N301 Fe3 119.2(6) . . ? 
O11 C10 O12 126.6(7) . . ? 
O11 C10 C13 117.6(7) . . ? 
O12 C10 C13 115.7(7) . . ? 
C16 C13 C10 112.4(7) . . ? 
C16 C13 C15 111.3(9) . . ? 
C10 C13 C15 106.6(7) . . ? 
C16 C13 C14 111.0(8) . . ? 
C10 C13 C14 108.1(8) . . ? 
C15 C13 C14 107.1(9) . . ? 
O21 C20 O22 124.4(8) . . ? 
O21 C20 C23 119.4(7) . . ? 
O22 C20 C23 116.1(8) . . ? 
C25 C23 C24 109.1(9) . . ? 
C25 C23 C20 112.4(8) . . ? 
C24 C23 C20 108.1(8) . . ? 
C25 C23 C26 110.6(10) . . ? 
C24 C23 C26 109.3(9) . . ? 
C20 C23 C26 107.2(8) . . ? 
O31 C30 O32 127.2(8) . . ? 
O31 C30 C33 116.7(7) . . ? 
O32 C30 C33 116.1(8) . . ? 
C36 C33 C34 111.6(8) . . ? 
C36 C33 C35 109.3(9) . . ? 
C34 C33 C35 108.9(9) . . ? 
C36 C33 C30 113.1(8) . . ? 
C34 C33 C30 109.7(8) . . ? 
C35 C33 C30 104.0(7) . . ? 
O41 C40 O42 125.4(8) . . ? 
O41 C40 C43 116.5(8) . . ? 
O42 C40 C43 118.0(8) . . ? 
C40 C43 C44 107.7(9) . . ? 
C40 C43 C46 108.8(8) . . ? 
C44 C43 C46 111.1(9) . . ? 
C40 C43 C45 110.0(8) . . ? 
C44 C43 C45 111.1(10) . . ? 
C46 C43 C45 108.2(10) . . ? 
O52 C50 O51 126.1(7) . . ? 
O52 C50 C53 118.0(7) . . ? 
O51 C50 C53 115.9(7) . . ? 
C56 C53 C55 112.3(10) . . ? 
C56 C53 C50 109.6(8) . . ? 
C55 C53 C50 111.3(7) . . ? 
C56 C53 C54 109.2(10) . . ? 
C55 C53 C54 109.5(10) . . ? 
C50 C53 C54 104.7(8) . . ? 
O62 C60 O61 126.0(8) . . ? 
O62 C60 C63 116.3(7) . . ? 
O61 C60 C63 117.7(7) . . ? 
C65 C63 C66 110.3(7) . . ? 
C65 C63 C60 107.8(7) . . ? 
C66 C63 C60 111.1(7) . . ? 
C65 C63 C64 109.7(7) . . ? 
C66 C63 C64 109.2(8) . . ? 
C60 C63 C64 108.6(7) . . ? 
N101 C102 C103 122.9(10) . . ? 
C104 C103 C102 119.3(10) . . ? 
C103 C104 C105 119.0(10) . . ? 
C106 C105 C104 119.2(10) . . ? 
N101 C106 C105 122.9(9) . . ? 
N201 C202 C203 122.2(9) . . ? 
C204 C203 C202 118.1(9) . . ? 
C205 C204 C203 119.6(8) . . ? 
C204 C205 C206 118.8(9) . . ? 
N201 C206 C205 121.4(8) . . ? 
N301 C302 C303 122.4(9) . . ? 
C304 C303 C302 119.0(9) . . ? 
C303 C304 C305 118.4(10) . . ? 
C304 C305 C306 119.5(10) . . ? 
N301 C306 C305 122.3(10) . . ? 
  
_diffrn_measured_fraction_theta_max    0.998 
_diffrn_reflns_theta_full              20.81 
_diffrn_measured_fraction_theta_full   0.998 
_refine_diff_density_max    1.041 
_refine_diff_density_min   -0.621 
_refine_diff_density_rms    0.112 
#===END
 
data_fe852s 
 
_audit_creation_method            SHELXL-97 
_chemical_name_systematic 
; 
 ? 
; 
_chemical_name_common             ? 
_chemical_melting_point           ? 
_chemical_formula_moiety          ? 
_chemical_formula_sum 
 'C45 H69 Fe3 N3 O13' 
_chemical_formula_weight          1027.58 
 
loop_ 
 _atom_type_symbol 
 _atom_type_description 
 _atom_type_scat_dispersion_real 
 _atom_type_scat_dispersion_imag 
 _atom_type_scat_source 
 'C'  'C'   0.0033   0.0016 
 'International Tables Vol C Tables 4.2.6.8 and 6.1.1.4' 
 'H'  'H'   0.0000   0.0000 
 'International Tables Vol C Tables 4.2.6.8 and 6.1.1.4' 
 'N'  'N'   0.0061   0.0033 
 'International Tables Vol C Tables 4.2.6.8 and 6.1.1.4' 
 'O'  'O'   0.0106   0.0060 
 'International Tables Vol C Tables 4.2.6.8 and 6.1.1.4' 
 'Fe'  'Fe'   0.3463   0.8444 
 'International Tables Vol C Tables 4.2.6.8 and 6.1.1.4' 
 
_symmetry_cell_setting            ? 
_symmetry_space_group_name_H-M    ? 
 
loop_ 
 _symmetry_equiv_pos_as_xyz 
 'x, y, z' 
 '-x, y+1/2, -z' 
 
_cell_length_a                    11.6025(10) 
_cell_length_b                    19.748(2) 
_cell_length_c                    11.9140(10) 
_cell_angle_alpha                 90.00 
_cell_angle_beta                  106.826(2) 
_cell_angle_gamma                 90.00 
_cell_volume                      2612.9(4) 
_cell_formula_units_Z             2 
_cell_measurement_temperature     293(2) 
_cell_measurement_reflns_used     ? 
_cell_measurement_theta_min       ? 
_cell_measurement_theta_max       ? 
 
_exptl_crystal_description        ? 
_exptl_crystal_colour             ? 
_exptl_crystal_size_max           ? 
_exptl_crystal_size_mid           ? 
_exptl_crystal_size_min           ? 
_exptl_crystal_density_meas       ? 
_exptl_crystal_density_diffrn     1.306 
_exptl_crystal_density_method     'not measured' 
_exptl_crystal_F_000              1084 
_exptl_absorpt_coefficient_mu     0.881 
_exptl_absorpt_correction_type    ? 
_exptl_absorpt_correction_T_min   ? 
_exptl_absorpt_correction_T_max   ? 
_exptl_absorpt_process_details    ? 
 
_exptl_special_details 
; 
 ? 
; 
 
_diffrn_ambient_temperature       293(2) 
_diffrn_radiation_wavelength      0.71073 
_diffrn_radiation_type            MoK\a 
_diffrn_radiation_source          'fine-focus sealed tube' 
_diffrn_radiation_monochromator   graphite 
_diffrn_measurement_device_type   ? 
_diffrn_measurement_method        ? 
_diffrn_detector_area_resol_mean  ? 
_diffrn_standards_number          ? 
_diffrn_standards_interval_count  ? 
_diffrn_standards_interval_time   ? 
_diffrn_standards_decay_%         ? 
_diffrn_reflns_number             11334 
_diffrn_reflns_av_R_equivalents   0.0000 
_diffrn_reflns_av_sigmaI/netI     0.0381 
_diffrn_reflns_limit_h_min        -15 
_diffrn_reflns_limit_h_max        14 
_diffrn_reflns_limit_k_min        -25 
_diffrn_reflns_limit_k_max        25 
_diffrn_reflns_limit_l_min        0 
_diffrn_reflns_limit_l_max        16 
_diffrn_reflns_theta_min          2.39 
_diffrn_reflns_theta_max          29.60 
_reflns_number_total              11334 
_reflns_number_gt                 11114 
_reflns_threshold_expression      >2sigma(I) 
 
_computing_data_collection        ? 
_computing_cell_refinement        ? 
_computing_data_reduction         ? 
_computing_structure_solution     'SHELXS-97 (Sheldrick, 1990)' 
_computing_structure_refinement   'SHELXL-97 (Sheldrick, 1997)' 
_computing_molecular_graphics     ? 
_computing_publication_material   ? 
 
_refine_special_details 
; 
 Refinement of F^2^ against ALL reflections.  The weighted R-factor wR and 
 goodness of fit S are based on F^2^, conventional R-factors R are based 
 on F, with F set to zero for negative F^2^. The threshold expression of 
 F^2^ > 2sigma(F^2^) is used only for calculating R-factors(gt) etc. and is 
 not relevant to the choice of reflections for refinement.  R-factors based 
 on F^2^ are statistically about twice as large as those based on F, and R- 
 factors based on ALL data will be even larger. 
; 
 
_refine_ls_structure_factor_coef  Fsqd  
_refine_ls_matrix_type            full 
_refine_ls_weighting_scheme       calc  
_refine_ls_weighting_details 
 'calc w=1/[\s^2^(Fo^2^)+(0.0000P)^2^+2.5000P] where P=(Fo^2^+2Fc^2^)/3' 
_atom_sites_solution_primary      direct 
_atom_sites_solution_secondary    difmap 
_atom_sites_solution_hydrogens    geom 
_refine_ls_hydrogen_treatment     mixed 
_refine_ls_extinction_method      none 
_refine_ls_extinction_coef        ? 
_refine_ls_abs_structure_details 
 'Flack H D (1983), Acta Cryst. A39, 876-881' 
_refine_ls_abs_structure_Flack    0.012(13) 
_refine_ls_number_reflns          11334 
_refine_ls_number_parameters      507 
_refine_ls_number_restraints      34 
_refine_ls_R_factor_all           0.0459 
_refine_ls_R_factor_gt            0.0449 
_refine_ls_wR_factor_ref          0.1071 
_refine_ls_wR_factor_gt           0.1063 
_refine_ls_goodness_of_fit_ref    1.432 
_refine_ls_restrained_S_all       1.430 
_refine_ls_shift/su_max           0.008 
_refine_ls_shift/su_mean          0.000 
 
loop_ 
 _atom_site_label 
 _atom_site_type_symbol 
 _atom_site_fract_x 
 _atom_site_fract_y 
 _atom_site_fract_z 
 _atom_site_U_iso_or_equiv 
 _atom_site_adp_type 
 _atom_site_occupancy 
 _atom_site_symmetry_multiplicity 
 _atom_site_calc_flag 
 _atom_site_refinement_flags 
 _atom_site_disorder_assembly 
 _atom_site_disorder_group 
Fe1 Fe 0.88734(4) 0.17892(6) 0.26557(4) 0.02098(10) Uani 1 1 d . . . 
Fe2 Fe 0.74898(4) 0.03753(6) 0.29410(4) 0.01791(9) Uani 1 1 d . . . 
Fe3 Fe 0.58591(4) 0.16903(6) 0.18073(4) 0.02116(10) Uani 1 1 d . . . 
O1 O 0.73950(18) 0.12643(12) 0.24803(18) 0.0151(4) Uani 1 1 d . . . 
O11 O 0.9802(2) 0.13793(14) 0.4252(2) 0.0257(5) Uani 1 1 d . . . 
O12 O 0.8643(2) 0.05359(13) 0.4574(2) 0.0233(5) Uani 1 1 d . . . 
O22 O 0.8889(2) 0.01012(13) 0.2374(2) 0.0227(5) Uani 1 1 d . . . 
O21 O 0.9661(2) 0.10419(14) 0.1824(2) 0.0261(5) Uani 1 1 d . . . 
O31 O 0.6093(2) 0.04202(14) 0.3635(2) 0.0229(4) Uani 1 1 d . . . 
O32 O 0.5186(2) 0.14293(13) 0.3211(2) 0.0244(5) Uani 1 1 d . . . 
O41 O 0.6377(2) -0.00159(13) 0.1410(2) 0.0238(5) Uani 1 1 d . . . 
O42 O 0.5066(2) 0.08380(13) 0.0923(2) 0.0250(5) Uani 1 1 d . . . 
O51 O 0.6282(2) 0.19820(14) 0.0314(2) 0.0231(5) Uani 1 1 d . . . 
O52 O 0.8226(2) 0.22584(14) 0.1063(2) 0.0225(5) Uani 1 1 d . . . 
O61 O 0.6309(2) 0.25995(14) 0.2619(2) 0.0230(5) Uani 1 1 d . . . 
O62 O 0.8285(2) 0.25664(13) 0.3553(2) 0.0224(5) Uani 1 1 d . . . 
N101 N 1.0456(3) 0.24332(16) 0.2757(2) 0.0219(6) Uani 1 1 d . . . 
N201 N 0.7579(3) -0.07023(16) 0.3545(2) 0.0222(6) Uani 1 1 d . . . 
N301 N 0.4093(3) 0.21491(16) 0.0867(3) 0.0244(6) Uani 1 1 d . . . 
C10 C 0.9503(3) 0.09532(17) 0.4893(3) 0.0191(6) Uani 1 1 d . A . 
C13 C 1.0237(2) 0.09419(13) 0.6188(3) 0.0237(7) Uani 1 1 d D . . 
C14 C 1.1583(3) 0.0952(3) 0.6278(4) 0.0375(6) Uiso 0.910(5) 1 d PD A 1 
H14A H 1.1771 0.0571 0.5862 0.056 Uiso 0.910(5) 1 calc PR A 1 
H14B H 1.2047 0.0928 0.7087 0.056 Uiso 0.910(5) 1 calc PR A 1 
H14C H 1.1772 0.1363 0.5940 0.056 Uiso 0.910(5) 1 calc PR A 1 
C15 C 0.9932(4) 0.15984(18) 0.6728(4) 0.0375(6) Uiso 0.910(5) 1 d PD A 1 
H15A H 1.0368 0.1613 0.7547 0.056 Uiso 0.910(5) 1 calc PR A 1 
H15B H 0.9083 0.1613 0.6640 0.056 Uiso 0.910(5) 1 calc PR A 1 
H15C H 1.0152 0.1980 0.6337 0.056 Uiso 0.910(5) 1 calc PR A 1 
C16 C 0.9940(4) 0.03239(19) 0.6833(4) 0.0375(6) Uiso 0.910(5) 1 d PD A 1 
H16A H 1.0028 -0.0081 0.6419 0.056 Uiso 0.910(5) 1 calc PR A 1 
H16B H 0.9126 0.0358 0.6869 0.056 Uiso 0.910(5) 1 calc PR A 1 
H16C H 1.0480 0.0308 0.7614 0.056 Uiso 0.910(5) 1 calc PR A 1 
C14A C 1.0902(14) 0.0262(5) 0.644(4) 0.0375(6) Uiso 0.090(5) 1 d PD A 2 
H14D H 1.0334 -0.0101 0.6215 0.056 Uiso 0.090(5) 1 calc PR A 2 
H14E H 1.1312 0.0229 0.7265 0.056 Uiso 0.090(5) 1 calc PR A 2 
H14F H 1.1478 0.0234 0.6005 0.056 Uiso 0.090(5) 1 calc PR A 2 
C15A C 1.1264(12) 0.1452(11) 0.664(4) 0.0375(6) Uiso 0.090(5) 1 d PD A 2 
H15D H 1.0974 0.1901 0.6414 0.056 Uiso 0.090(5) 1 calc PR A 2 
H15E H 1.1908 0.1348 0.6314 0.056 Uiso 0.090(5) 1 calc PR A 2 
H15F H 1.1554 0.1425 0.7481 0.056 Uiso 0.090(5) 1 calc PR A 2 
C16A C 0.936(3) 0.1054(8) 0.692(3) 0.0375(6) Uiso 0.090(5) 1 d PD A 2 
H16D H 0.9014 0.1498 0.6765 0.056 Uiso 0.090(5) 1 calc PR A 2 
H16E H 0.9786 0.1014 0.7737 0.056 Uiso 0.090(5) 1 calc PR A 2 
H16F H 0.8733 0.0720 0.6712 0.056 Uiso 0.090(5) 1 calc PR A 2 
C20 C 0.9545(3) 0.04130(19) 0.1859(3) 0.0208(6) Uani 1 1 d . B . 
C23 C 1.0232(3) -0.00474(16) 0.1237(3) 0.0286(7) Uani 1 1 d D . . 
C24 C 0.984(3) -0.0790(6) 0.122(2) 0.0436(7) Uiso 0.102(5) 1 d PD B 1 
H24A H 0.9801 -0.0919 0.1982 0.065 Uiso 0.102(5) 1 calc PR B 1 
H24B H 1.0406 -0.1072 0.0991 0.065 Uiso 0.102(5) 1 calc PR B 1 
H24C H 0.9056 -0.0843 0.0662 0.065 Uiso 0.102(5) 1 calc PR B 1 
C25 C 1.0002(19) 0.021(2) -0.0022(11) 0.0436(7) Uiso 0.102(5) 1 d PD B 1 
H25A H 1.0276 0.0672 -0.0005 0.065 Uiso 0.102(5) 1 calc PR B 1 
H25B H 0.9155 0.0193 -0.0420 0.065 Uiso 0.102(5) 1 calc PR B 1 
H25C H 1.0430 -0.0065 -0.0428 0.065 Uiso 0.102(5) 1 calc PR B 1 
C26 C 1.1536(14) 0.0017(12) 0.202(3) 0.0436(7) Uiso 0.102(5) 1 d PD B 1 
H26A H 1.1728 0.0487 0.2178 0.065 Uiso 0.102(5) 1 calc PR B 1 
H26B H 1.2070 -0.0174 0.1616 0.065 Uiso 0.102(5) 1 calc PR B 1 
H26C H 1.1626 -0.0221 0.2738 0.065 Uiso 0.102(5) 1 calc PR B 1 
C24A C 0.9317(4) -0.0449(3) 0.0281(4) 0.0436(7) Uiso 0.898(5) 1 d PD B 2 
H24D H 0.8847 -0.0142 -0.0296 0.065 Uiso 0.898(5) 1 calc PR B 2 
H24E H 0.8795 -0.0698 0.0626 0.065 Uiso 0.898(5) 1 calc PR B 2 
H24F H 0.9735 -0.0758 -0.0085 0.065 Uiso 0.898(5) 1 calc PR B 2 
C25A C 1.1050(4) 0.0360(3) 0.0682(4) 0.0436(7) Uiso 0.898(5) 1 d PD B 2 
H25D H 1.0587 0.0706 0.0185 0.065 Uiso 0.898(5) 1 calc PR B 2 
H25E H 1.1393 0.0064 0.0226 0.065 Uiso 0.898(5) 1 calc PR B 2 
H25F H 1.1684 0.0567 0.1289 0.065 Uiso 0.898(5) 1 calc PR B 2 
C26A C 1.0998(4) -0.0542(2) 0.2143(4) 0.0436(7) Uiso 0.898(5) 1 d PD B 2 
H26D H 1.1448 -0.0296 0.2823 0.065 Uiso 0.898(5) 1 calc PR B 2 
H26E H 1.1544 -0.0777 0.1807 0.065 Uiso 0.898(5) 1 calc PR B 2 
H26F H 1.0482 -0.0864 0.2363 0.065 Uiso 0.898(5) 1 calc PR B 2 
C30 C 0.5452(3) 0.08988(17) 0.3815(3) 0.0196(6) Uani 1 1 d . C . 
C33 C 0.4901(3) 0.07989(14) 0.4821(3) 0.0295(7) Uani 1 1 d D . . 
C34 C 0.5676(4) 0.0326(2) 0.5760(4) 0.0426(7) Uiso 0.939(6) 1 d PD C 1 
H34A H 0.5808 -0.0091 0.5402 0.064 Uiso 0.939(6) 1 calc PR C 1 
H34B H 0.5269 0.0234 0.6340 0.064 Uiso 0.939(6) 1 calc PR C 1 
H34C H 0.6436 0.0538 0.6127 0.064 Uiso 0.939(6) 1 calc PR C 1 
C35 C 0.3683(3) 0.0454(3) 0.4270(4) 0.0426(7) Uiso 0.939(6) 1 d PD C 1 
H35A H 0.3808 0.0035 0.3914 0.064 Uiso 0.939(6) 1 calc PR C 1 
H35B H 0.3182 0.0746 0.3685 0.064 Uiso 0.939(6) 1 calc PR C 1 
H35C H 0.3297 0.0366 0.4867 0.064 Uiso 0.939(6) 1 calc PR C 1 
C36 C 0.4671(4) 0.14755(18) 0.5350(4) 0.0426(7) Uiso 0.939(6) 1 d PD C 1 
H36A H 0.4279 0.1782 0.4732 0.064 Uiso 0.939(6) 1 calc PR C 1 
H36B H 0.5424 0.1666 0.5800 0.064 Uiso 0.939(6) 1 calc PR C 1 
H36C H 0.4166 0.1402 0.5851 0.064 Uiso 0.939(6) 1 calc PR C 1 
C34A C 0.615(3) 0.0799(17) 0.572(5) 0.0426(7) Uiso 0.061(6) 1 d PD C 2 
H34D H 0.6538 0.1227 0.5690 0.064 Uiso 0.061(6) 1 calc PR C 2 
H34E H 0.6631 0.0443 0.5531 0.064 Uiso 0.061(6) 1 calc PR C 2 
H34F H 0.6076 0.0728 0.6488 0.064 Uiso 0.061(6) 1 calc PR C 2 
C35A C 0.428(3) 0.0126(16) 0.493(5) 0.0426(7) Uiso 0.061(6) 1 d PD C 2 
H35D H 0.4798 -0.0243 0.4869 0.064 Uiso 0.061(6) 1 calc PR C 2 
H35E H 0.3538 0.0093 0.4312 0.064 Uiso 0.061(6) 1 calc PR C 2 
H35F H 0.4120 0.0107 0.5675 0.064 Uiso 0.061(6) 1 calc PR C 2 
C36A C 0.3839(17) 0.128(2) 0.473(5) 0.0426(7) Uiso 0.061(6) 1 d PD C 2 
H36D H 0.4098 0.1739 0.4705 0.064 Uiso 0.061(6) 1 calc PR C 2 
H36E H 0.3554 0.1220 0.5409 0.064 Uiso 0.061(6) 1 calc PR C 2 
H36F H 0.3201 0.1179 0.4037 0.064 Uiso 0.061(6) 1 calc PR C 2 
C40 C 0.5464(3) 0.02755(18) 0.0748(3) 0.0213(6) Uani 1 1 d . . . 
C43 C 0.4782(3) -0.01210(16) -0.0352(3) 0.0364(10) Uani 1 1 d D . . 
C44 C 0.4203(4) -0.0732(2) 0.0066(4) 0.0476(6) Uiso 1 1 d D . . 
H44A H 0.4808 -0.0978 0.0644 0.071 Uiso 1 1 calc R . . 
H44B H 0.3847 -0.1023 -0.0588 0.071 Uiso 1 1 calc R . . 
H44C H 0.3593 -0.0579 0.0405 0.071 Uiso 1 1 calc R . . 
C45 C 0.3819(4) 0.0332(3) -0.1159(4) 0.0476(6) Uiso 1 1 d D . . 
H45A H 0.4192 0.0732 -0.1353 0.071 Uiso 1 1 calc R . . 
H45B H 0.3237 0.0459 -0.0765 0.071 Uiso 1 1 calc R . . 
H45C H 0.3425 0.0090 -0.1864 0.071 Uiso 1 1 calc R . . 
C46 C 0.5676(4) -0.0348(3) -0.1007(4) 0.0476(6) Uiso 1 1 d D . . 
H46A H 0.6053 0.0043 -0.1228 0.071 Uiso 1 1 calc R . . 
H46B H 0.5255 -0.0595 -0.1698 0.071 Uiso 1 1 calc R . . 
H46C H 0.6279 -0.0633 -0.0506 0.071 Uiso 1 1 calc R . . 
C50 C 0.7292(3) 0.21629(17) 0.0227(3) 0.0178(6) Uani 1 1 d . . . 
C53 C 0.7383(3) 0.22534(16) -0.1021(3) 0.0245(7) Uani 1 1 d D . . 
C54 C 0.7383(5) 0.15376(18) -0.1522(5) 0.0531(7) Uiso 1 1 d D . . 
H54A H 0.6687 0.1296 -0.1459 0.080 Uiso 1 1 calc R . . 
H54B H 0.8098 0.1303 -0.1088 0.080 Uiso 1 1 calc R . . 
H54C H 0.7365 0.1567 -0.2331 0.080 Uiso 1 1 calc R . . 
C55 C 0.8554(4) 0.2615(3) -0.1015(5) 0.0531(7) Uiso 1 1 d D . . 
H55A H 0.9218 0.2407 -0.0444 0.080 Uiso 1 1 calc R . . 
H55B H 0.8503 0.3083 -0.0819 0.080 Uiso 1 1 calc R . . 
H55C H 0.8673 0.2581 -0.1777 0.080 Uiso 1 1 calc R . . 
C56 C 0.6270(4) 0.2624(3) -0.1786(4) 0.0531(7) Uiso 1 1 d D . . 
H56A H 0.5590 0.2324 -0.1964 0.080 Uiso 1 1 calc R . . 
H56B H 0.6418 0.2768 -0.2502 0.080 Uiso 1 1 calc R . . 
H56C H 0.6107 0.3012 -0.1372 0.080 Uiso 1 1 calc R . . 
C60 C 0.7232(3) 0.27785(16) 0.3417(3) 0.0170(6) Uani 1 1 d . . . 
C63 C 0.7075(3) 0.33039(17) 0.4311(3) 0.0196(6) Uani 1 1 d . . . 
C64 C 0.7658(3) 0.3031(2) 0.5548(3) 0.0284(7) Uiso 1 1 d . . . 
H64A H 0.7252 0.2625 0.5663 0.043 Uiso 1 1 calc R . . 
H64B H 0.7597 0.3364 0.6114 0.043 Uiso 1 1 calc R . . 
H64C H 0.8491 0.2933 0.5642 0.043 Uiso 1 1 calc R . . 
C65 C 0.7720(3) 0.3953(2) 0.4127(3) 0.0307(8) Uiso 1 1 d . . . 
H65A H 0.8543 0.3851 0.4181 0.046 Uiso 1 1 calc R . . 
H65B H 0.7694 0.4278 0.4718 0.046 Uiso 1 1 calc R . . 
H65C H 0.7328 0.4136 0.3366 0.046 Uiso 1 1 calc R . . 
C66 C 0.5743(4) 0.3443(2) 0.4157(4) 0.0337(8) Uiso 1 1 d . . . 
H66A H 0.5353 0.3032 0.4275 0.051 Uiso 1 1 calc R . . 
H66B H 0.5371 0.3610 0.3379 0.051 Uiso 1 1 calc R . . 
H66C H 0.5667 0.3775 0.4719 0.051 Uiso 1 1 calc R . . 
C102 C 1.1576(3) 0.2185(2) 0.2952(3) 0.0297(8) Uani 1 1 d . . . 
H10A H 1.1701 0.1725 0.3106 0.036 Uiso 1 1 calc R . . 
C103 C 1.2553(3) 0.2584(3) 0.2932(4) 0.0374(10) Uani 1 1 d . . . 
H10B H 1.3316 0.2395 0.3073 0.045 Uiso 1 1 calc R . . 
C104 C 1.2374(4) 0.3265(3) 0.2700(4) 0.0388(10) Uani 1 1 d . . . 
H10C H 1.3014 0.3542 0.2674 0.047 Uiso 1 1 calc R . . 
C105 C 1.1240(4) 0.3530(2) 0.2508(4) 0.0331(8) Uani 1 1 d . . . 
H10D H 1.1102 0.3990 0.2366 0.040 Uiso 1 1 calc R . . 
C106 C 1.0302(3) 0.30987(19) 0.2530(3) 0.0252(7) Uani 1 1 d . . . 
H10E H 0.9532 0.3279 0.2380 0.030 Uiso 1 1 calc R . . 
C202 C 0.6580(3) -0.10717(18) 0.3412(3) 0.0242(7) Uani 1 1 d . . . 
H20A H 0.5838 -0.0869 0.3067 0.029 Uiso 1 1 calc R . . 
C203 C 0.6601(3) -0.17433(19) 0.3765(3) 0.0290(8) Uani 1 1 d . . . 
H20B H 0.5889 -0.1982 0.3672 0.035 Uiso 1 1 calc R . . 
C204 C 0.7699(4) -0.20467(19) 0.4256(3) 0.0296(8) Uani 1 1 d . . . 
H20C H 0.7739 -0.2499 0.4482 0.036 Uiso 1 1 calc R . . 
C205 C 0.8737(3) -0.16777(19) 0.4411(3) 0.0247(7) Uani 1 1 d . . . 
H20D H 0.9485 -0.1873 0.4757 0.030 Uiso 1 1 calc R . . 
C206 C 0.8647(3) -0.10073(19) 0.4039(3) 0.0235(7) Uani 1 1 d . . . 
H20E H 0.9350 -0.0759 0.4135 0.028 Uiso 1 1 calc R . . 
C302 C 0.4063(3) 0.27425(19) 0.0316(4) 0.0281(7) Uani 1 1 d . . . 
H30A H 0.4774 0.2986 0.0439 0.034 Uiso 1 1 calc R . . 
C303 C 0.3004(4) 0.3011(2) -0.0438(4) 0.0342(8) Uani 1 1 d . . . 
H30B H 0.3014 0.3419 -0.0824 0.041 Uiso 1 1 calc R . . 
C304 C 0.1948(4) 0.2658(2) -0.0593(4) 0.0407(10) Uani 1 1 d . . . 
H30C H 0.1229 0.2826 -0.1083 0.049 Uiso 1 1 calc R . . 
C305 C 0.1968(4) 0.2053(2) -0.0015(5) 0.0423(10) Uani 1 1 d . . . 
H30D H 0.1263 0.1809 -0.0099 0.051 Uiso 1 1 calc R . . 
C306 C 0.3055(3) 0.1815(2) 0.0691(4) 0.0318(8) Uani 1 1 d . . . 
H30E H 0.3065 0.1400 0.1064 0.038 Uiso 1 1 calc R . . 
 
loop_ 
 _atom_site_aniso_label 
 _atom_site_aniso_U_11 
 _atom_site_aniso_U_22 
 _atom_site_aniso_U_33 
 _atom_site_aniso_U_23 
 _atom_site_aniso_U_13 
 _atom_site_aniso_U_12 
Fe1 0.0348(2) 0.0142(2) 0.01374(18) 0.00154(17) 0.00662(17) 0.00419(18) 
Fe2 0.0243(2) 0.0138(2) 0.01492(18) 0.00147(17) 0.00439(15) -0.00045(18) 
Fe3 0.0345(2) 0.0145(2) 0.01522(19) -0.00108(17) 0.00825(17) -0.00529(18) 
O1 0.0141(9) 0.0149(10) 0.0151(9) 0.0011(8) 0.0019(7) 0.0009(7) 
O11 0.0258(11) 0.0252(12) 0.0229(11) 0.0057(10) 0.0021(9) -0.0054(10) 
O12 0.0270(11) 0.0210(12) 0.0180(10) 0.0027(9) 0.0003(9) -0.0026(9) 
O22 0.0261(11) 0.0170(11) 0.0288(12) 0.0046(9) 0.0140(10) 0.0039(9) 
O21 0.0333(13) 0.0168(11) 0.0289(12) -0.0016(10) 0.0101(10) -0.0027(10) 
O31 0.0254(10) 0.0181(11) 0.0268(11) 0.0029(10) 0.0102(9) -0.0015(10) 
O32 0.0268(11) 0.0196(11) 0.0262(11) 0.0050(10) 0.0066(9) 0.0005(9) 
O41 0.0311(12) 0.0159(11) 0.0203(11) -0.0021(9) 0.0010(9) 0.0034(9) 
O42 0.0276(12) 0.0173(11) 0.0250(12) -0.0053(9) -0.0005(10) 0.0018(9) 
O51 0.0192(10) 0.0319(13) 0.0175(10) 0.0037(9) 0.0044(8) 0.0008(9) 
O52 0.0228(11) 0.0249(12) 0.0158(10) 0.0055(9) -0.0006(8) -0.0028(9) 
O61 0.0213(11) 0.0208(11) 0.0217(11) -0.0026(9) -0.0017(9) -0.0033(9) 
O62 0.0187(10) 0.0217(12) 0.0274(12) -0.0053(10) 0.0075(9) 0.0004(9) 
N101 0.0239(13) 0.0232(14) 0.0168(12) -0.0013(11) 0.0030(10) 0.0045(11) 
N201 0.0268(14) 0.0184(13) 0.0198(12) 0.0034(11) 0.0043(11) -0.0012(11) 
N301 0.0294(14) 0.0177(13) 0.0280(14) -0.0034(11) 0.0111(12) -0.0034(11) 
C10 0.0226(14) 0.0173(14) 0.0160(13) 0.0006(11) 0.0035(11) 0.0026(12) 
C13 0.0250(15) 0.0224(16) 0.0182(14) 0.0020(12) -0.0025(12) 0.0036(13) 
C20 0.0216(13) 0.0187(14) 0.0191(13) 0.0004(12) 0.0010(11) 0.0003(13) 
C23 0.0348(18) 0.0214(17) 0.0330(18) -0.0008(14) 0.0151(15) -0.0019(14) 
C30 0.0204(13) 0.0180(15) 0.0186(14) 0.0004(12) 0.0028(11) -0.0073(12) 
C33 0.0363(18) 0.0252(18) 0.0328(19) 0.0034(14) 0.0193(16) 0.0009(14) 
C40 0.0223(14) 0.0201(16) 0.0176(13) -0.0009(12) -0.0004(11) 0.0009(12) 
C43 0.044(2) 0.0214(17) 0.0297(18) -0.0112(15) -0.0122(17) 0.0098(15) 
C50 0.0232(14) 0.0174(14) 0.0119(12) 0.0009(11) 0.0034(11) 0.0032(11) 
C53 0.0238(15) 0.0354(19) 0.0145(13) 0.0021(13) 0.0057(12) 0.0010(13) 
C60 0.0212(14) 0.0121(13) 0.0174(13) 0.0022(11) 0.0053(11) -0.0016(11) 
C63 0.0229(14) 0.0172(15) 0.0191(14) -0.0026(12) 0.0070(11) 0.0013(11) 
C102 0.0281(17) 0.035(2) 0.0215(15) -0.0051(15) -0.0002(13) 0.0122(15) 
C103 0.0222(17) 0.058(3) 0.0310(19) -0.0018(19) 0.0062(15) 0.0074(17) 
C104 0.0285(18) 0.057(3) 0.0296(19) 0.0028(19) 0.0069(15) -0.0096(18) 
C105 0.0322(18) 0.033(2) 0.0318(19) 0.0052(16) 0.0066(15) -0.0052(15) 
C106 0.0253(16) 0.0229(17) 0.0266(16) 0.0018(13) 0.0063(13) 0.0001(13) 
C202 0.0262(16) 0.0196(16) 0.0236(15) 0.0024(13) 0.0023(13) -0.0015(13) 
C203 0.0341(18) 0.0200(16) 0.0298(17) 0.0035(14) 0.0047(15) -0.0088(14) 
C204 0.048(2) 0.0141(15) 0.0264(17) 0.0057(13) 0.0095(16) -0.0008(14) 
C205 0.0285(16) 0.0203(16) 0.0243(15) 0.0043(13) 0.0058(13) 0.0066(13) 
C206 0.0275(16) 0.0198(16) 0.0229(15) 0.0036(13) 0.0068(13) 0.0021(13) 
C302 0.0251(16) 0.0202(16) 0.039(2) 0.0034(15) 0.0093(15) 0.0011(13) 
C303 0.0324(19) 0.0264(19) 0.042(2) 0.0025(16) 0.0076(16) 0.0052(15) 
C304 0.034(2) 0.030(2) 0.048(2) -0.0050(18) -0.0023(18) 0.0038(16) 
C305 0.0275(18) 0.028(2) 0.065(3) -0.005(2) 0.0031(19) -0.0078(15) 
C306 0.0326(17) 0.0217(17) 0.0425(19) -0.0026(16) 0.0130(15) -0.0044(15) 
 
_geom_special_details 
; 
 All esds (except the esd in the dihedral angle between two l.s. planes) 
 are estimated using the full covariance matrix.  The cell esds are taken 
 into account individually in the estimation of esds in distances, angles 
 and torsion angles; correlations between esds in cell parameters are only 
 used when they are defined by crystal symmetry.  An approximate (isotropic) 
 treatment of cell esds is used for estimating esds involving l.s. planes. 
; 
 
loop_ 
 _geom_bond_atom_site_label_1 
 _geom_bond_atom_site_label_2 
 _geom_bond_distance 
 _geom_bond_site_symmetry_2 
 _geom_bond_publ_flag 
Fe1 O1 1.963(2) . ? 
Fe1 O52 2.049(2) . ? 
Fe1 O11 2.061(2) . ? 
Fe1 O62 2.094(2) . ? 
Fe1 O21 2.125(3) . ? 
Fe1 N101 2.208(3) . ? 
Fe1 Fe2 3.2870(7) . ? 
Fe1 Fe3 3.3534(7) . ? 
Fe2 O1 1.833(2) . ? 
Fe2 O22 2.005(2) . ? 
Fe2 O31 2.024(2) . ? 
Fe2 O12 2.042(2) . ? 
Fe2 O41 2.056(2) . ? 
Fe2 N201 2.239(3) . ? 
Fe2 Fe3 3.2663(7) . ? 
Fe3 O1 1.923(2) . ? 
Fe3 O61 2.035(2) . ? 
Fe3 O42 2.056(2) . ? 
Fe3 O51 2.060(2) . ? 
Fe3 O32 2.104(3) . ? 
Fe3 N301 2.224(3) . ? 
O11 C10 1.252(4) . ? 
O12 C10 1.265(4) . ? 
O22 C20 1.266(4) . ? 
O21 C20 1.251(4) . ? 
O31 C30 1.258(4) . ? 
O32 C30 1.258(4) . ? 
O41 C40 1.261(4) . ? 
O42 C40 1.244(4) . ? 
O51 C50 1.257(4) . ? 
O52 C50 1.257(4) . ? 
O61 C60 1.259(4) . ? 
O62 C60 1.258(4) . ? 
N101 C102 1.345(4) . ? 
N101 C106 1.343(5) . ? 
N201 C202 1.339(4) . ? 
N201 C206 1.350(4) . ? 
N301 C306 1.336(5) . ? 
N301 C302 1.338(5) . ? 
C10 C13 1.531(4) . ? 
C13 C15A 1.5339(11) . ? 
C13 C16 1.5334(10) . ? 
C13 C14A 1.5339(10) . ? 
C13 C15 1.5339(10) . ? 
C13 C14 1.5338(10) . ? 
C13 C16A 1.5340(10) . ? 
C20 C23 1.534(5) . ? 
C23 C24A 1.5340(10) . ? 
C23 C25 1.5341(10) . ? 
C23 C26A 1.5341(10) . ? 
C23 C26 1.5340(10) . ? 
C23 C25A 1.5334(10) . ? 
C23 C24 1.5340(10) . ? 
C30 C33 1.526(5) . ? 
C33 C34 1.5337(10) . ? 
C33 C34A 1.5341(10) . ? 
C33 C36 1.5335(10) . ? 
C33 C35 1.5343(10) . ? 
C33 C35A 1.5339(10) . ? 
C33 C36A 1.5340(10) . ? 
C40 C43 1.535(4) . ? 
C43 C45 1.5337(10) . ? 
C43 C44 1.5336(10) . ? 
C43 C46 1.5341(10) . ? 
C50 C53 1.531(4) . ? 
C53 C56 1.5336(10) . ? 
C53 C55 1.5329(10) . ? 
C53 C54 1.5344(10) . ? 
C60 C63 1.535(4) . ? 
C63 C64 1.531(5) . ? 
C63 C65 1.532(5) . ? 
C63 C66 1.527(5) . ? 
C102 C103 1.386(6) . ? 
C103 C104 1.377(7) . ? 
C104 C105 1.372(6) . ? 
C105 C106 1.387(5) . ? 
C202 C203 1.390(5) . ? 
C203 C204 1.376(5) . ? 
C204 C205 1.373(5) . ? 
C205 C206 1.390(5) . ? 
C302 C303 1.399(5) . ? 
C303 C304 1.375(6) . ? 
C304 C305 1.376(6) . ? 
C305 C306 1.381(6) . ? 
 
loop_ 
 _geom_angle_atom_site_label_1 
 _geom_angle_atom_site_label_2 
 _geom_angle_atom_site_label_3 
 _geom_angle 
 _geom_angle_site_symmetry_1 
 _geom_angle_site_symmetry_3 
 _geom_angle_publ_flag 
O1 Fe1 O52 93.76(9) . . ? 
O1 Fe1 O11 95.64(9) . . ? 
O52 Fe1 O11 170.35(10) . . ? 
O1 Fe1 O62 92.16(9) . . ? 
O52 Fe1 O62 93.15(10) . . ? 
O11 Fe1 O62 88.71(10) . . ? 
O1 Fe1 O21 93.66(9) . . ? 
O52 Fe1 O21 88.52(10) . . ? 
O11 Fe1 O21 88.68(10) . . ? 
O62 Fe1 O21 173.83(10) . . ? 
O1 Fe1 N101 175.75(10) . . ? 
O52 Fe1 N101 82.31(10) . . ? 
O11 Fe1 N101 88.35(10) . . ? 
O62 Fe1 N101 86.47(10) . . ? 
O21 Fe1 N101 87.87(10) . . ? 
O1 Fe1 Fe2 28.90(6) . . ? 
O52 Fe1 Fe2 114.89(7) . . ? 
O11 Fe1 Fe2 73.23(7) . . ? 
O62 Fe1 Fe2 109.19(7) . . ? 
O21 Fe1 Fe2 75.34(7) . . ? 
N101 Fe1 Fe2 155.09(8) . . ? 
O1 Fe1 Fe3 30.02(6) . . ? 
O52 Fe1 Fe3 71.13(7) . . ? 
O11 Fe1 Fe3 118.45(7) . . ? 
O62 Fe1 Fe3 74.40(6) . . ? 
O21 Fe1 Fe3 111.74(7) . . ? 
N101 Fe1 Fe3 145.92(8) . . ? 
Fe2 Fe1 Fe3 58.920(14) . . ? 
O1 Fe2 O22 98.16(10) . . ? 
O1 Fe2 O31 95.43(10) . . ? 
O22 Fe2 O31 166.41(10) . . ? 
O1 Fe2 O12 95.88(9) . . ? 
O22 Fe2 O12 89.53(10) . . ? 
O31 Fe2 O12 89.15(10) . . ? 
O1 Fe2 O41 97.26(9) . . ? 
O22 Fe2 O41 87.78(10) . . ? 
O31 Fe2 O41 90.44(10) . . ? 
O12 Fe2 O41 166.83(10) . . ? 
O1 Fe2 N201 178.28(11) . . ? 
O22 Fe2 N201 83.41(10) . . ? 
O31 Fe2 N201 83.00(11) . . ? 
O12 Fe2 N201 83.40(10) . . ? 
O41 Fe2 N201 83.49(10) . . ? 
O1 Fe2 Fe1 31.16(6) . . ? 
O22 Fe2 Fe1 74.17(7) . . ? 
O31 Fe2 Fe1 118.55(7) . . ? 
O12 Fe2 Fe1 76.21(7) . . ? 
O41 Fe2 Fe1 115.30(7) . . ? 
N201 Fe2 Fe1 149.56(8) . . ? 
O1 Fe2 Fe3 30.39(6) . . ? 
O22 Fe2 Fe3 120.26(7) . . ? 
O31 Fe2 Fe3 72.40(7) . . ? 
O12 Fe2 Fe3 114.33(7) . . ? 
O41 Fe2 Fe3 78.00(7) . . ? 
N201 Fe2 Fe3 148.84(8) . . ? 
Fe1 Fe2 Fe3 61.554(15) . . ? 
O1 Fe3 O61 96.24(9) . . ? 
O1 Fe3 O42 94.52(9) . . ? 
O61 Fe3 O42 168.84(10) . . ? 
O1 Fe3 O51 93.36(9) . . ? 
O61 Fe3 O51 94.09(10) . . ? 
O42 Fe3 O51 88.26(10) . . ? 
O1 Fe3 O32 94.22(9) . . ? 
O61 Fe3 O32 86.64(10) . . ? 
O42 Fe3 O32 89.59(10) . . ? 
O51 Fe3 O32 172.27(10) . . ? 
O1 Fe3 N301 174.63(11) . . ? 
O61 Fe3 N301 87.25(10) . . ? 
O42 Fe3 N301 82.24(10) . . ? 
O51 Fe3 N301 82.31(10) . . ? 
O32 Fe3 N301 90.04(10) . . ? 
O1 Fe3 Fe2 28.82(7) . . ? 
O61 Fe3 Fe2 117.83(7) . . ? 
O42 Fe3 Fe2 71.39(7) . . ? 
O51 Fe3 Fe2 108.97(7) . . ? 
O32 Fe3 Fe2 77.31(7) . . ? 
N301 Fe3 Fe2 150.60(8) . . ? 
O1 Fe3 Fe1 30.70(7) . . ? 
O61 Fe3 Fe1 72.77(7) . . ? 
O42 Fe3 Fe1 118.36(7) . . ? 
O51 Fe3 Fe1 75.84(6) . . ? 
O32 Fe3 Fe1 111.66(7) . . ? 
N301 Fe3 Fe1 148.93(8) . . ? 
Fe2 Fe3 Fe1 59.526(14) . . ? 
Fe2 O1 Fe1 119.94(11) . . ? 
Fe2 O1 Fe3 120.78(11) . . ? 
Fe1 O1 Fe3 119.28(11) . . ? 
C10 O11 Fe1 131.6(2) . . ? 
C10 O12 Fe2 129.1(2) . . ? 
C20 O22 Fe2 133.7(2) . . ? 
C20 O21 Fe1 127.5(2) . . ? 
C30 O31 Fe2 133.2(2) . . ? 
C30 O32 Fe3 124.9(2) . . ? 
C40 O41 Fe2 125.5(2) . . ? 
C40 O42 Fe3 133.2(2) . . ? 
C50 O51 Fe3 127.7(2) . . ? 
C50 O52 Fe1 131.9(2) . . ? 
C60 O61 Fe3 130.7(2) . . ? 
C60 O62 Fe1 128.8(2) . . ? 
C102 N101 C106 117.1(3) . . ? 
C102 N101 Fe1 123.2(3) . . ? 
C106 N101 Fe1 119.5(2) . . ? 
C202 N201 C206 117.5(3) . . ? 
C202 N201 Fe2 121.5(2) . . ? 
C206 N201 Fe2 121.0(2) . . ? 
C306 N301 C302 117.5(3) . . ? 
C306 N301 Fe3 122.3(3) . . ? 
C302 N301 Fe3 119.6(2) . . ? 
O11 C10 O12 126.1(3) . . ? 
O11 C10 C13 116.9(3) . . ? 
O12 C10 C13 117.0(3) . . ? 
C10 C13 C15A 119.6(18) . . ? 
C10 C13 C16 112.1(3) . . ? 
C15A C13 C16 127.6(18) . . ? 
C10 C13 C14A 108.2(17) . . ? 
C15A C13 C14A 102.1(14) . . ? 
C16 C13 C14A 51.6(9) . . ? 
C10 C13 C15 106.4(3) . . ? 
C15A C13 C15 63.1(4) . . ? 
C16 C13 C15 110.5(3) . . ? 
C14A C13 C15 145.2(18) . . ? 
C10 C13 C14 109.1(3) . . ? 
C15A C13 C14 45.2(5) . . ? 
C16 C13 C14 110.3(3) . . ? 
C14A C13 C14 63.5(4) . . ? 
C15 C13 C14 108.3(3) . . ? 
C10 C13 C16A 107.6(17) . . ? 
C15A C13 C16A 106.3(17) . . ? 
C16 C13 C16A 63.2(4) . . ? 
C14A C13 C16A 113.1(14) . . ? 
C15 C13 C16A 50.8(8) . . ? 
C14 C13 C16A 141.9(17) . . ? 
O21 C20 O22 125.7(3) . . ? 
O21 C20 C23 119.8(3) . . ? 
O22 C20 C23 114.5(3) . . ? 
C24A C23 C25 63.9(9) . . ? 
C24A C23 C26A 109.2(3) . . ? 
C25 C23 C26A 143.3(17) . . ? 
C24A C23 C26 147.3(16) . . ? 
C25 C23 C26 115.1(13) . . ? 
C26A C23 C26 50.1(4) . . ? 
C24A C23 C20 108.7(3) . . ? 
C25 C23 C20 107.9(18) . . ? 
C26A C23 C20 108.3(3) . . ? 
C26 C23 C20 102.6(17) . . ? 
C24A C23 C25A 109.5(4) . . ? 
C25 C23 C25A 50.0(4) . . ? 
C26A C23 C25A 109.4(4) . . ? 
C26 C23 C25A 65.8(10) . . ? 
C20 C23 C25A 111.7(3) . . ? 
C24A C23 C24 49.8(4) . . ? 
C25 C23 C24 109.7(16) . . ? 
C26A C23 C24 60.8(7) . . ? 
C26 C23 C24 109.1(12) . . ? 
C20 C23 C24 112.3(18) . . ? 
C25A C23 C24 135.6(18) . . ? 
O32 C30 O31 126.0(3) . . ? 
O32 C30 C33 117.9(3) . . ? 
O31 C30 C33 116.0(3) . . ? 
C30 C33 C34 111.2(3) . . ? 
C30 C33 C34A 91(3) . . ? 
C34 C33 C34A 41.9(4) . . ? 
C30 C33 C36 111.9(3) . . ? 
C34 C33 C36 111.4(3) . . ? 
C34A C33 C36 87(2) . . ? 
C30 C33 C35 105.4(3) . . ? 
C34 C33 C35 108.3(3) . . ? 
C34A C33 C35 150.2(5) . . ? 
C36 C33 C35 108.3(3) . . ? 
C30 C33 C35A 119(3) . . ? 
C34 C33 C35A 66.5(5) . . ? 
C34A C33 C35A 108.3(7) . . ? 
C36 C33 C35A 125(3) . . ? 
C35 C33 C35A 41.9(4) . . ? 
C30 C33 C36A 112(3) . . ? 
C34 C33 C36A 136(3) . . ? 
C34A C33 C36A 129(3) . . ? 
C36 C33 C36A 42.0(4) . . ? 
C35 C33 C36A 67.9(10) . . ? 
C35A C33 C36A 99(3) . . ? 
O42 C40 O41 126.0(3) . . ? 
O42 C40 C43 118.3(3) . . ? 
O41 C40 C43 115.6(3) . . ? 
C40 C43 C45 109.8(3) . . ? 
C40 C43 C44 106.8(3) . . ? 
C45 C43 C44 110.8(3) . . ? 
C40 C43 C46 109.0(3) . . ? 
C45 C43 C46 109.2(3) . . ? 
C44 C43 C46 111.1(3) . . ? 
O51 C50 O52 126.0(3) . . ? 
O51 C50 C53 116.2(3) . . ? 
O52 C50 C53 117.8(3) . . ? 
C50 C53 C56 110.5(3) . . ? 
C50 C53 C55 111.1(3) . . ? 
C56 C53 C55 111.9(4) . . ? 
C50 C53 C54 106.1(3) . . ? 
C56 C53 C54 107.7(3) . . ? 
C55 C53 C54 109.3(3) . . ? 
O62 C60 O61 125.9(3) . . ? 
O62 C60 C63 116.2(3) . . ? 
O61 C60 C63 117.9(3) . . ? 
C64 C63 C65 109.5(3) . . ? 
C64 C63 C66 109.2(3) . . ? 
C65 C63 C66 110.6(3) . . ? 
C64 C63 C60 108.8(3) . . ? 
C65 C63 C60 107.8(3) . . ? 
C66 C63 C60 110.9(3) . . ? 
N101 C102 C103 123.0(4) . . ? 
C104 C103 C102 118.8(4) . . ? 
C105 C104 C103 119.2(4) . . ? 
C104 C105 C106 118.8(4) . . ? 
N101 C106 C105 123.0(3) . . ? 
N201 C202 C203 123.0(3) . . ? 
C204 C203 C202 118.5(3) . . ? 
C203 C204 C205 119.6(3) . . ? 
C204 C205 C206 118.7(3) . . ? 
N201 C206 C205 122.6(3) . . ? 
N301 C302 C303 122.7(3) . . ? 
C304 C303 C302 118.5(4) . . ? 
C305 C304 C303 119.2(4) . . ? 
C304 C305 C306 118.8(4) . . ? 
N301 C306 C305 123.3(4) . . ? 
 
_diffrn_measured_fraction_theta_max    0.905 
_diffrn_reflns_theta_full              29.60 
_diffrn_measured_fraction_theta_full   0.905 
_refine_diff_density_max    0.951 
_refine_diff_density_min   -0.764 
_refine_diff_density_rms    0.077 
#===END
 
data_fe100cs 
 
_audit_creation_method            SHELXL-97 
_chemical_name_systematic 
; 
 ? 
; 
_chemical_name_common             ? 
_chemical_melting_point           ? 
_chemical_formula_moiety          ? 
_chemical_formula_sum 
 'C45 H69 Fe3 N3 O13' 
_chemical_formula_weight          1027.58 
 
loop_ 
 _atom_type_symbol 
 _atom_type_description 
 _atom_type_scat_dispersion_real 
 _atom_type_scat_dispersion_imag 
 _atom_type_scat_source 
 'C'  'C'   0.0033   0.0016 
 'International Tables Vol C Tables 4.2.6.8 and 6.1.1.4' 
 'H'  'H'   0.0000   0.0000 
 'International Tables Vol C Tables 4.2.6.8 and 6.1.1.4' 
 'N'  'N'   0.0061   0.0033 
 'International Tables Vol C Tables 4.2.6.8 and 6.1.1.4' 
 'O'  'O'   0.0106   0.0060 
 'International Tables Vol C Tables 4.2.6.8 and 6.1.1.4' 
 'Fe'  'Fe'   0.3463   0.8444 
 'International Tables Vol C Tables 4.2.6.8 and 6.1.1.4' 
 
_symmetry_cell_setting            ? 
_symmetry_space_group_name_H-M    ? 
 
loop_ 
 _symmetry_equiv_pos_as_xyz 
 'x, y, z' 
 '-x, y+1/2, -z' 
 
_cell_length_a                    11.6077(10) 
_cell_length_b                    19.764(2) 
_cell_length_c                    11.9384(10) 
_cell_angle_alpha                 90.00 
_cell_angle_beta                  106.690(2) 
_cell_angle_gamma                 90.00 
_cell_volume                      2623.4(4) 
_cell_formula_units_Z             2 
_cell_measurement_temperature     293(2) 
_cell_measurement_reflns_used     ? 
_cell_measurement_theta_min       ? 
_cell_measurement_theta_max       ? 
 
_exptl_crystal_description        ? 
_exptl_crystal_colour             ? 
_exptl_crystal_size_max           ? 
_exptl_crystal_size_mid           ? 
_exptl_crystal_size_min           ? 
_exptl_crystal_density_meas       ? 
_exptl_crystal_density_diffrn     1.301 
_exptl_crystal_density_method     'not measured' 
_exptl_crystal_F_000              1084 
_exptl_absorpt_coefficient_mu     0.878 
_exptl_absorpt_correction_type    ? 
_exptl_absorpt_correction_T_min   ? 
_exptl_absorpt_correction_T_max   ? 
_exptl_absorpt_process_details    ? 
 
_exptl_special_details 
; 
 ? 
; 
 
_diffrn_ambient_temperature       293(2) 
_diffrn_radiation_wavelength      0.71073 
_diffrn_radiation_type            MoK\a 
_diffrn_radiation_source          'fine-focus sealed tube' 
_diffrn_radiation_monochromator   graphite 
_diffrn_measurement_device_type   ? 
_diffrn_measurement_method        ? 
_diffrn_detector_area_resol_mean  ? 
_diffrn_standards_number          ? 
_diffrn_standards_interval_count  ? 
_diffrn_standards_interval_time   ? 
_diffrn_standards_decay_%         ? 
_diffrn_reflns_number             11484 
_diffrn_reflns_av_R_equivalents   0.0000 
_diffrn_reflns_av_sigmaI/netI     0.0370 
_diffrn_reflns_limit_h_min        -15 
_diffrn_reflns_limit_h_max        15 
_diffrn_reflns_limit_k_min        -26 
_diffrn_reflns_limit_k_max        26 
_diffrn_reflns_limit_l_min        0 
_diffrn_reflns_limit_l_max        16 
_diffrn_reflns_theta_min          2.39 
_diffrn_reflns_theta_max          29.31 
_reflns_number_total              11484 
_reflns_number_gt                 11164 
_reflns_threshold_expression      >2sigma(I) 
 
_computing_data_collection        ? 
_computing_cell_refinement        ? 
_computing_data_reduction         ? 
_computing_structure_solution     'SHELXS-97 (Sheldrick, 1990)' 
_computing_structure_refinement   'SHELXL-97 (Sheldrick, 1997)' 
_computing_molecular_graphics     ? 
_computing_publication_material   ? 
 
_refine_special_details 
; 
 Refinement of F^2^ against ALL reflections.  The weighted R-factor wR and 
 goodness of fit S are based on F^2^, conventional R-factors R are based 
 on F, with F set to zero for negative F^2^. The threshold expression of 
 F^2^ > 2sigma(F^2^) is used only for calculating R-factors(gt) etc. and is 
 not relevant to the choice of reflections for refinement.  R-factors based 
 on F^2^ are statistically about twice as large as those based on F, and R- 
 factors based on ALL data will be even larger. 
; 
 
_refine_ls_structure_factor_coef  Fsqd  
_refine_ls_matrix_type            full 
_refine_ls_weighting_scheme       calc  
_refine_ls_weighting_details 
 'calc w=1/[\s^2^(Fo^2^)+(0.0593P)^2^+2.3436P] where P=(Fo^2^+2Fc^2^)/3' 
_atom_sites_solution_primary      direct 
_atom_sites_solution_secondary    difmap 
_atom_sites_solution_hydrogens    geom 
_refine_ls_hydrogen_treatment     mixed 
_refine_ls_extinction_method      none 
_refine_ls_extinction_coef        ? 
_refine_ls_abs_structure_details 
 'Flack H D (1983), Acta Cryst. A39, 876-881' 
_refine_ls_abs_structure_Flack    0.015(13) 
_refine_ls_number_reflns          11484 
_refine_ls_number_parameters      518 
_refine_ls_number_restraints      40 
_refine_ls_R_factor_all           0.0448 
_refine_ls_R_factor_gt            0.0433 
_refine_ls_wR_factor_ref          0.1186 
_refine_ls_wR_factor_gt           0.1168 
_refine_ls_goodness_of_fit_ref    1.111 
_refine_ls_restrained_S_all       1.110 
_refine_ls_shift/su_max           0.003 
_refine_ls_shift/su_mean          0.000 
 
loop_ 
 _atom_site_label 
 _atom_site_type_symbol 
 _atom_site_fract_x 
 _atom_site_fract_y 
 _atom_site_fract_z 
 _atom_site_U_iso_or_equiv 
 _atom_site_adp_type 
 _atom_site_occupancy 
 _atom_site_symmetry_multiplicity 
 _atom_site_calc_flag 
 _atom_site_refinement_flags 
 _atom_site_disorder_assembly 
 _atom_site_disorder_group 
Fe1 Fe 0.88206(4) 0.17826(5) 0.26398(4) 0.02337(10) Uani 1 1 d . . . 
Fe2 Fe 0.74517(4) 0.03737(5) 0.29184(4) 0.02037(9) Uani 1 1 d . . . 
Fe3 Fe 0.58054(4) 0.16938(5) 0.17843(4) 0.02391(10) Uani 1 1 d . . . 
O1 O 0.73762(17) 0.12635(11) 0.24679(18) 0.0182(4) Uani 1 1 d . . . 
O11 O 0.9763(2) 0.13834(14) 0.4232(2) 0.0289(5) Uani 1 1 d . . . 
O12 O 0.8621(2) 0.05286(13) 0.45502(19) 0.0263(5) Uani 1 1 d . . . 
O22 O 0.8859(2) 0.01005(12) 0.2351(2) 0.0265(5) Uani 1 1 d . . . 
O21 O 0.9627(2) 0.10457(13) 0.1828(2) 0.0294(5) Uani 1 1 d . . . 
O31 O 0.60671(19) 0.04187(13) 0.3617(2) 0.0265(4) Uani 1 1 d . . . 
O32 O 0.5160(2) 0.14264(13) 0.3208(2) 0.0280(5) Uani 1 1 d . . . 
O41 O 0.6345(2) -0.00154(12) 0.1392(2) 0.0266(5) Uani 1 1 d . . . 
O42 O 0.5027(2) 0.08371(13) 0.0899(2) 0.0302(5) Uani 1 1 d . . . 
O51 O 0.6262(2) 0.19888(14) 0.0301(2) 0.0274(5) Uani 1 1 d . . . 
O52 O 0.8209(2) 0.22509(13) 0.10660(19) 0.0252(5) Uani 1 1 d . . . 
O61 O 0.6282(2) 0.26022(13) 0.2611(2) 0.0262(5) Uani 1 1 d . . . 
O62 O 0.82642(19) 0.25607(12) 0.3530(2) 0.0252(5) Uani 1 1 d . . . 
N101 N 1.0428(2) 0.24231(15) 0.2754(2) 0.0239(5) Uani 1 1 d . . . 
N201 N 0.7550(2) -0.07053(14) 0.3522(2) 0.0239(5) Uani 1 1 d . . . 
N301 N 0.4052(3) 0.21560(15) 0.0842(3) 0.0273(6) Uani 1 1 d . . . 
C10 C 0.9475(3) 0.09508(16) 0.4872(3) 0.0207(5) Uani 1 1 d . A . 
C13 C 1.0225(2) 0.09290(13) 0.6154(3) 0.0265(6) Uani 1 1 d D . . 
C14 C 1.1563(3) 0.0929(3) 0.6213(5) 0.0446(7) Uiso 0.884(5) 1 d PD A 1 
H14A H 1.1733 0.0545 0.5794 0.067 Uiso 0.884(5) 1 calc PR A 1 
H14B H 1.2041 0.0905 0.7015 0.067 Uiso 0.884(5) 1 calc PR A 1 
H14C H 1.1751 0.1337 0.5867 0.067 Uiso 0.884(5) 1 calc PR A 1 
C15 C 0.9955(4) 0.15862(18) 0.6714(4) 0.0446(7) Uiso 0.884(5) 1 d PD A 1 
H15A H 1.0398 0.1592 0.7528 0.067 Uiso 0.884(5) 1 calc PR A 1 
H15B H 0.9109 0.1612 0.6635 0.067 Uiso 0.884(5) 1 calc PR A 1 
H15C H 1.0188 0.1967 0.6329 0.067 Uiso 0.884(5) 1 calc PR A 1 
C16 C 0.9936(4) 0.0312(2) 0.6803(4) 0.0446(7) Uiso 0.884(5) 1 d PD A 1 
H16A H 1.0023 -0.0093 0.6390 0.067 Uiso 0.884(5) 1 calc PR A 1 
H16B H 0.9124 0.0344 0.6845 0.067 Uiso 0.884(5) 1 calc PR A 1 
H16C H 1.0479 0.0297 0.7579 0.067 Uiso 0.884(5) 1 calc PR A 1 
C14A C 1.0886(13) 0.0251(5) 0.644(3) 0.0446(7) Uiso 0.116(5) 1 d PD A 2 
H14D H 1.0319 -0.0113 0.6217 0.067 Uiso 0.116(5) 1 calc PR A 2 
H14E H 1.1276 0.0226 0.7269 0.067 Uiso 0.116(5) 1 calc PR A 2 
H14F H 1.1477 0.0215 0.6026 0.067 Uiso 0.116(5) 1 calc PR A 2 
C15A C 1.1278(11) 0.1422(10) 0.660(3) 0.0446(7) Uiso 0.116(5) 1 d PD A 2 
H15D H 1.1009 0.1875 0.6385 0.067 Uiso 0.116(5) 1 calc PR A 2 
H15E H 1.1910 0.1308 0.6264 0.067 Uiso 0.116(5) 1 calc PR A 2 
H15F H 1.1575 0.1390 0.7439 0.067 Uiso 0.116(5) 1 calc PR A 2 
C16A C 0.932(2) 0.1035(8) 0.686(3) 0.0446(7) Uiso 0.116(5) 1 d PD A 2 
H16D H 0.8975 0.1479 0.6701 0.067 Uiso 0.116(5) 1 calc PR A 2 
H16E H 0.9725 0.0991 0.7675 0.067 Uiso 0.116(5) 1 calc PR A 2 
H16F H 0.8696 0.0701 0.6630 0.067 Uiso 0.116(5) 1 calc PR A 2 
C20 C 0.9516(3) 0.04155(18) 0.1849(3) 0.0238(6) Uani 1 1 d . B . 
C23 C 1.0226(3) -0.00340(16) 0.1239(3) 0.0331(7) Uani 1 1 d D . . 
C24 C 0.984(2) -0.0779(4) 0.1197(15) 0.0528(8) Uiso 0.154(5) 1 d PD B 1 
H24A H 0.9805 -0.0916 0.1956 0.079 Uiso 0.154(5) 1 calc PR B 1 
H24B H 1.0422 -0.1054 0.0971 0.079 Uiso 0.154(5) 1 calc PR B 1 
H24C H 0.9069 -0.0833 0.0639 0.079 Uiso 0.154(5) 1 calc PR B 1 
C25 C 1.0019(15) 0.0243(15) -0.0004(9) 0.0528(8) Uiso 0.154(5) 1 d PD B 1 
H25A H 1.0300 0.0702 0.0036 0.079 Uiso 0.154(5) 1 calc PR B 1 
H25B H 0.9176 0.0230 -0.0410 0.079 Uiso 0.154(5) 1 calc PR B 1 
H25C H 1.0451 -0.0028 -0.0414 0.079 Uiso 0.154(5) 1 calc PR B 1 
C26 C 1.1546(9) 0.0008(10) 0.198(2) 0.0528(8) Uiso 0.154(5) 1 d PD B 1 
H26A H 1.1763 0.0473 0.2151 0.079 Uiso 0.154(5) 1 calc PR B 1 
H26B H 1.2050 -0.0184 0.1545 0.079 Uiso 0.154(5) 1 calc PR B 1 
H26C H 1.1651 -0.0239 0.2690 0.079 Uiso 0.154(5) 1 calc PR B 1 
C24A C 0.9332(5) -0.0435(3) 0.0271(4) 0.0528(8) Uiso 0.846(5) 1 d PD B 2 
H24D H 0.8864 -0.0128 -0.0305 0.079 Uiso 0.846(5) 1 calc PR B 2 
H24E H 0.8808 -0.0691 0.0603 0.079 Uiso 0.846(5) 1 calc PR B 2 
H24F H 0.9764 -0.0738 -0.0092 0.079 Uiso 0.846(5) 1 calc PR B 2 
C25A C 1.1061(4) 0.0385(3) 0.0720(5) 0.0528(8) Uiso 0.846(5) 1 d PD B 2 
H25D H 1.0603 0.0730 0.0221 0.079 Uiso 0.846(5) 1 calc PR B 2 
H25E H 1.1425 0.0095 0.0272 0.079 Uiso 0.846(5) 1 calc PR B 2 
H25F H 1.1677 0.0590 0.1340 0.079 Uiso 0.846(5) 1 calc PR B 2 
C26A C 1.0977(5) -0.0530(3) 0.2147(5) 0.0528(8) Uiso 0.846(5) 1 d PD B 2 
H26D H 1.1426 -0.0284 0.2826 0.079 Uiso 0.846(5) 1 calc PR B 2 
H26E H 1.1523 -0.0769 0.1818 0.079 Uiso 0.846(5) 1 calc PR B 2 
H26F H 1.0454 -0.0847 0.2366 0.079 Uiso 0.846(5) 1 calc PR B 2 
C30 C 0.5431(3) 0.09012(17) 0.3810(3) 0.0227(6) Uani 1 1 d . C . 
C33 C 0.4917(3) 0.07964(15) 0.4837(3) 0.0355(8) Uani 1 1 d D . . 
C34 C 0.5713(4) 0.0326(3) 0.5762(4) 0.0509(7) Uiso 0.897(6) 1 d PD C 1 
H34A H 0.5842 -0.0090 0.5399 0.076 Uiso 0.897(6) 1 calc PR C 1 
H34B H 0.5323 0.0232 0.6354 0.076 Uiso 0.897(6) 1 calc PR C 1 
H34C H 0.6473 0.0541 0.6113 0.076 Uiso 0.897(6) 1 calc PR C 1 
C35 C 0.3708(3) 0.0442(3) 0.4299(5) 0.0509(7) Uiso 0.897(6) 1 d PD C 1 
H35A H 0.3841 0.0024 0.3945 0.076 Uiso 0.897(6) 1 calc PR C 1 
H35B H 0.3198 0.0729 0.3715 0.076 Uiso 0.897(6) 1 calc PR C 1 
H35C H 0.3328 0.0351 0.4899 0.076 Uiso 0.897(6) 1 calc PR C 1 
C36 C 0.4656(5) 0.14724(19) 0.5346(5) 0.0509(7) Uiso 0.897(6) 1 d PD C 1 
H36A H 0.4265 0.1773 0.4720 0.076 Uiso 0.897(6) 1 calc PR C 1 
H36B H 0.5398 0.1671 0.5800 0.076 Uiso 0.897(6) 1 calc PR C 1 
H36C H 0.4142 0.1397 0.5836 0.076 Uiso 0.897(6) 1 calc PR C 1 
C34A C 0.6150(19) 0.0813(10) 0.576(3) 0.0509(7) Uiso 0.103(6) 1 d PD C 2 
H34D H 0.6527 0.1242 0.5727 0.076 Uiso 0.103(6) 1 calc PR C 2 
H34E H 0.6646 0.0457 0.5604 0.076 Uiso 0.103(6) 1 calc PR C 2 
H34F H 0.6047 0.0751 0.6522 0.076 Uiso 0.103(6) 1 calc PR C 2 
C35A C 0.4279(19) 0.0143(12) 0.502(3) 0.0509(7) Uiso 0.103(6) 1 d PD C 2 
H35D H 0.4769 -0.0239 0.4962 0.076 Uiso 0.103(6) 1 calc PR C 2 
H35E H 0.3519 0.0110 0.4427 0.076 Uiso 0.103(6) 1 calc PR C 2 
H35F H 0.4148 0.0150 0.5776 0.076 Uiso 0.103(6) 1 calc PR C 2 
C36A C 0.3845(12) 0.1273(13) 0.472(3) 0.0509(7) Uiso 0.103(6) 1 d PD C 2 
H36D H 0.4101 0.1733 0.4687 0.076 Uiso 0.103(6) 1 calc PR C 2 
H36E H 0.3539 0.1216 0.5378 0.076 Uiso 0.103(6) 1 calc PR C 2 
H36F H 0.3225 0.1168 0.4013 0.076 Uiso 0.103(6) 1 calc PR C 2 
C40 C 0.5431(3) 0.02771(17) 0.0725(3) 0.0246(6) Uani 1 1 d . . . 
C43 C 0.4765(3) -0.01166(16) -0.0373(3) 0.0442(11) Uani 1 1 d D . . 
C44 C 0.4188(5) -0.0732(2) 0.0036(5) 0.0578(7) Uiso 1 1 d D . . 
H44A H 0.4791 -0.0977 0.0612 0.087 Uiso 1 1 calc R . . 
H44B H 0.3840 -0.1021 -0.0620 0.087 Uiso 1 1 calc R . . 
H44C H 0.3573 -0.0582 0.0371 0.087 Uiso 1 1 calc R . . 
C45 C 0.3794(4) 0.0328(3) -0.1185(4) 0.0578(7) Uiso 1 1 d D . . 
H45A H 0.4158 0.0729 -0.1384 0.087 Uiso 1 1 calc R . . 
H45B H 0.3208 0.0451 -0.0794 0.087 Uiso 1 1 calc R . . 
H45C H 0.3408 0.0080 -0.1884 0.087 Uiso 1 1 calc R . . 
C46 C 0.5668(4) -0.0345(3) -0.1015(5) 0.0578(7) Uiso 1 1 d D . . 
H46A H 0.6046 0.0045 -0.1236 0.087 Uiso 1 1 calc R . . 
H46B H 0.5255 -0.0594 -0.1703 0.087 Uiso 1 1 calc R . . 
H46C H 0.6269 -0.0627 -0.0509 0.087 Uiso 1 1 calc R . . 
C50 C 0.7270(3) 0.21666(16) 0.0222(2) 0.0203(5) Uani 1 1 d . D . 
C53 C 0.7381(2) 0.22648(15) -0.1013(3) 0.0299(7) Uani 1 1 d D . . 
C54 C 0.7437(5) 0.15482(18) -0.1490(5) 0.0611(9) Uiso 0.940(6) 1 d PD D 1 
H54A H 0.6749 0.1295 -0.1438 0.092 Uiso 0.940(6) 1 calc PR D 1 
H54B H 0.8157 0.1328 -0.1038 0.092 Uiso 0.940(6) 1 calc PR D 1 
H54C H 0.7439 0.1574 -0.2292 0.092 Uiso 0.940(6) 1 calc PR D 1 
C55 C 0.8543(4) 0.2637(3) -0.1002(6) 0.0611(9) Uiso 0.940(6) 1 d PD D 1 
H55A H 0.9210 0.2433 -0.0435 0.092 Uiso 0.940(6) 1 calc PR D 1 
H55B H 0.8479 0.3104 -0.0803 0.092 Uiso 0.940(6) 1 calc PR D 1 
H55C H 0.8666 0.2609 -0.1763 0.092 Uiso 0.940(6) 1 calc PR D 1 
C56 C 0.6249(4) 0.2602(3) -0.1806(5) 0.0611(9) Uiso 0.940(6) 1 d PD D 1 
H56A H 0.5590 0.2288 -0.1964 0.092 Uiso 0.940(6) 1 calc PR D 1 
H56B H 0.6393 0.2735 -0.2527 0.092 Uiso 0.940(6) 1 calc PR D 1 
H56C H 0.6055 0.2994 -0.1421 0.092 Uiso 0.940(6) 1 calc PR D 1 
C54A C 0.8525(12) 0.1900(19) -0.108(8) 0.0611(9) Uiso 0.060(6) 1 d PD D 2 
H54D H 0.9215 0.2112 -0.0558 0.092 Uiso 0.060(6) 1 calc PR D 2 
H54E H 0.8584 0.1924 -0.1866 0.092 Uiso 0.060(6) 1 calc PR D 2 
H54F H 0.8491 0.1434 -0.0863 0.092 Uiso 0.060(6) 1 calc PR D 2 
C55A C 0.762(3) 0.3023(9) -0.078(8) 0.0611(9) Uiso 0.060(6) 1 d PD D 2 
H55D H 0.8219 0.3084 -0.0045 0.092 Uiso 0.060(6) 1 calc PR D 2 
H55E H 0.6891 0.3245 -0.0766 0.092 Uiso 0.060(6) 1 calc PR D 2 
H55F H 0.7904 0.3214 -0.1395 0.092 Uiso 0.060(6) 1 calc PR D 2 
C56A C 0.645(4) 0.1923(15) -0.203(5) 0.0611(9) Uiso 0.060(6) 1 d PD D 2 
H56D H 0.5675 0.1933 -0.1890 0.092 Uiso 0.060(6) 1 calc PR D 2 
H56E H 0.6680 0.1462 -0.2100 0.092 Uiso 0.060(6) 1 calc PR D 2 
H56F H 0.6404 0.2160 -0.2745 0.092 Uiso 0.060(6) 1 calc PR D 2 
C60 C 0.7216(3) 0.27739(15) 0.3408(3) 0.0188(5) Uani 1 1 d . . . 
C63 C 0.7073(3) 0.32933(16) 0.4313(3) 0.0229(6) Uani 1 1 d . . . 
C64 C 0.7662(3) 0.3009(2) 0.5534(3) 0.0352(8) Uiso 1 1 d . . . 
H64A H 0.7252 0.2604 0.5644 0.053 Uiso 1 1 calc R . . 
H64B H 0.7613 0.3338 0.6111 0.053 Uiso 1 1 calc R . . 
H64C H 0.8491 0.2908 0.5615 0.053 Uiso 1 1 calc R . . 
C65 C 0.7715(3) 0.3940(2) 0.4134(3) 0.0335(7) Uiso 1 1 d . . . 
H65A H 0.8538 0.3838 0.4188 0.050 Uiso 1 1 calc R . . 
H65B H 0.7687 0.4263 0.4725 0.050 Uiso 1 1 calc R . . 
H65C H 0.7326 0.4124 0.3376 0.050 Uiso 1 1 calc R . . 
C66 C 0.5745(3) 0.3434(2) 0.4177(4) 0.0382(8) Uiso 1 1 d . . . 
H66A H 0.5355 0.3023 0.4295 0.057 Uiso 1 1 calc R . . 
H66B H 0.5368 0.3604 0.3405 0.057 Uiso 1 1 calc R . . 
H66C H 0.5677 0.3764 0.4745 0.057 Uiso 1 1 calc R . . 
C102 C 1.1535(3) 0.2166(2) 0.2947(3) 0.0324(7) Uani 1 1 d . . . 
H10A H 1.1648 0.1706 0.3104 0.039 Uiso 1 1 calc R . . 
C103 C 1.2521(3) 0.2557(3) 0.2921(4) 0.0410(9) Uani 1 1 d . . . 
H10B H 1.3279 0.2362 0.3061 0.049 Uiso 1 1 calc R . . 
C104 C 1.2359(3) 0.3240(3) 0.2685(4) 0.0436(10) Uani 1 1 d . . . 
H10C H 1.3002 0.3512 0.2653 0.052 Uiso 1 1 calc R . . 
C105 C 1.1226(3) 0.3508(2) 0.2498(4) 0.0379(8) Uani 1 1 d . . . 
H10D H 1.1097 0.3969 0.2358 0.045 Uiso 1 1 calc R . . 
C106 C 1.0281(3) 0.30877(18) 0.2518(3) 0.0281(6) Uani 1 1 d . . . 
H10E H 0.9513 0.3272 0.2363 0.034 Uiso 1 1 calc R . . 
C202 C 0.6555(3) -0.10688(18) 0.3404(3) 0.0290(7) Uani 1 1 d . . . 
H20A H 0.5813 -0.0865 0.3071 0.035 Uiso 1 1 calc R . . 
C203 C 0.6580(3) -0.17405(18) 0.3760(3) 0.0327(7) Uani 1 1 d . . . 
H20B H 0.5869 -0.1980 0.3667 0.039 Uiso 1 1 calc R . . 
C204 C 0.7673(4) -0.20440(18) 0.4252(3) 0.0335(7) Uani 1 1 d . . . 
H20C H 0.7711 -0.2494 0.4487 0.040 Uiso 1 1 calc R . . 
C205 C 0.8713(3) -0.16772(18) 0.4394(3) 0.0289(7) Uani 1 1 d . . . 
H20D H 0.9462 -0.1871 0.4737 0.035 Uiso 1 1 calc R . . 
C206 C 0.8613(3) -0.10069(18) 0.4010(3) 0.0276(6) Uani 1 1 d . . . 
H20E H 0.9314 -0.0758 0.4095 0.033 Uiso 1 1 calc R . . 
C302 C 0.4026(3) 0.27525(19) 0.0305(3) 0.0317(7) Uani 1 1 d . . . 
H30A H 0.4736 0.2999 0.0447 0.038 Uiso 1 1 calc R . . 
C303 C 0.2979(4) 0.3023(2) -0.0461(4) 0.0396(8) Uani 1 1 d . . . 
H30B H 0.3000 0.3429 -0.0846 0.048 Uiso 1 1 calc R . . 
C304 C 0.1917(4) 0.2672(2) -0.0631(4) 0.0450(10) Uani 1 1 d . . . 
H30C H 0.1202 0.2845 -0.1118 0.054 Uiso 1 1 calc R . . 
C305 C 0.1928(4) 0.2065(2) -0.0073(5) 0.0503(12) Uani 1 1 d . . . 
H30D H 0.1222 0.1819 -0.0176 0.060 Uiso 1 1 calc R . . 
C306 C 0.3011(3) 0.1822(2) 0.0649(4) 0.0357(8) Uani 1 1 d . . . 
H30E H 0.3012 0.1407 0.1016 0.043 Uiso 1 1 calc R . . 
 
loop_ 
 _atom_site_aniso_label 
 _atom_site_aniso_U_11 
 _atom_site_aniso_U_22 
 _atom_site_aniso_U_33 
 _atom_site_aniso_U_23 
 _atom_site_aniso_U_13 
 _atom_site_aniso_U_12 
Fe1 0.0376(2) 0.0164(2) 0.01641(18) 0.00153(16) 0.00826(16) 0.00398(17) 
Fe2 0.02708(19) 0.01559(19) 0.01769(18) 0.00122(15) 0.00524(15) -0.00124(16) 
Fe3 0.0378(2) 0.0170(2) 0.01810(19) -0.00149(16) 0.00988(16) -0.00573(18) 
O1 0.0181(9) 0.0169(9) 0.0190(9) 0.0010(8) 0.0044(7) 0.0000(7) 
O11 0.0298(11) 0.0285(12) 0.0256(11) 0.0065(9) 0.0036(9) -0.0066(9) 
O12 0.0310(11) 0.0238(11) 0.0203(10) 0.0031(8) 0.0012(8) -0.0046(9) 
O22 0.0295(11) 0.0186(10) 0.0352(12) 0.0057(9) 0.0152(9) 0.0061(8) 
O21 0.0344(12) 0.0192(11) 0.0359(13) -0.0027(10) 0.0121(10) -0.0051(9) 
O31 0.0311(10) 0.0196(10) 0.0306(11) 0.0034(9) 0.0120(9) -0.0008(9) 
O32 0.0302(11) 0.0248(11) 0.0302(12) 0.0060(9) 0.0102(9) -0.0003(9) 
O41 0.0332(12) 0.0183(10) 0.0235(11) -0.0014(8) 0.0002(9) 0.0027(8) 
O42 0.0330(12) 0.0215(11) 0.0304(12) -0.0061(9) -0.0001(10) 0.0039(9) 
O51 0.0226(10) 0.0373(13) 0.0230(11) 0.0051(9) 0.0076(8) 0.0008(9) 
O52 0.0238(10) 0.0283(11) 0.0204(10) 0.0067(9) 0.0014(8) -0.0025(8) 
O61 0.0247(10) 0.0230(11) 0.0270(11) -0.0044(9) 0.0013(9) -0.0035(8) 
O62 0.0219(10) 0.0230(11) 0.0324(12) -0.0055(9) 0.0105(9) -0.0008(8) 
N101 0.0272(12) 0.0226(13) 0.0205(12) -0.0019(10) 0.0049(10) 0.0023(10) 
N201 0.0299(13) 0.0209(12) 0.0199(12) 0.0021(10) 0.0056(10) -0.0018(10) 
N301 0.0319(14) 0.0211(13) 0.0318(14) -0.0048(11) 0.0137(11) -0.0036(10) 
C10 0.0231(13) 0.0199(14) 0.0187(13) 0.0013(11) 0.0052(10) 0.0022(10) 
C13 0.0291(14) 0.0228(15) 0.0221(14) 0.0028(12) -0.0012(11) 0.0020(12) 
C20 0.0247(13) 0.0220(14) 0.0231(13) -0.0003(12) 0.0045(10) -0.0001(12) 
C23 0.0368(18) 0.0277(17) 0.0391(19) -0.0023(15) 0.0178(15) -0.0020(13) 
C30 0.0227(13) 0.0216(14) 0.0228(14) -0.0004(11) 0.0051(11) -0.0061(11) 
C33 0.0440(19) 0.0302(17) 0.042(2) 0.0069(15) 0.0277(16) 0.0023(14) 
C40 0.0277(13) 0.0201(15) 0.0221(13) -0.0031(11) 0.0008(11) 0.0024(12) 
C43 0.053(2) 0.0289(18) 0.0336(19) -0.0152(15) -0.0151(17) 0.0125(16) 
C50 0.0248(13) 0.0201(13) 0.0153(12) 0.0023(10) 0.0045(10) 0.0046(10) 
C53 0.0282(15) 0.043(2) 0.0195(14) 0.0022(14) 0.0090(12) 0.0003(14) 
C60 0.0229(13) 0.0146(12) 0.0189(13) 0.0008(10) 0.0063(10) -0.0022(10) 
C63 0.0269(14) 0.0195(14) 0.0231(14) -0.0033(11) 0.0084(11) 0.0018(11) 
C102 0.0314(16) 0.0357(18) 0.0269(16) -0.0047(14) 0.0030(13) 0.0107(14) 
C103 0.0278(17) 0.062(3) 0.0333(19) -0.0058(18) 0.0091(14) 0.0023(16) 
C104 0.0296(17) 0.062(3) 0.039(2) 0.0008(19) 0.0102(15) -0.0105(17) 
C105 0.0372(18) 0.036(2) 0.040(2) 0.0058(16) 0.0092(15) -0.0071(15) 
C106 0.0274(15) 0.0254(15) 0.0318(16) 0.0023(13) 0.0091(13) -0.0010(12) 
C202 0.0361(17) 0.0212(15) 0.0279(16) 0.0024(12) 0.0064(13) -0.0027(13) 
C203 0.0402(18) 0.0218(15) 0.0349(18) 0.0033(13) 0.0087(14) -0.0094(13) 
C204 0.053(2) 0.0174(15) 0.0309(17) 0.0054(13) 0.0131(15) -0.0012(14) 
C205 0.0334(16) 0.0245(15) 0.0283(16) 0.0054(13) 0.0080(13) 0.0061(12) 
C206 0.0335(16) 0.0235(15) 0.0267(15) 0.0037(12) 0.0101(13) 0.0015(12) 
C302 0.0299(16) 0.0253(16) 0.0402(19) 0.0020(14) 0.0107(14) -0.0014(13) 
C303 0.0395(19) 0.0310(18) 0.047(2) 0.0021(16) 0.0102(16) 0.0071(15) 
C304 0.0362(19) 0.036(2) 0.055(3) -0.0036(18) 0.0007(17) 0.0059(16) 
C305 0.0314(18) 0.0298(19) 0.081(3) -0.011(2) 0.0029(19) -0.0087(15) 
C306 0.0353(17) 0.0259(17) 0.047(2) -0.0021(16) 0.0135(15) -0.0037(14) 
 
_geom_special_details 
; 
 All esds (except the esd in the dihedral angle between two l.s. planes) 
 are estimated using the full covariance matrix.  The cell esds are taken 
 into account individually in the estimation of esds in distances, angles 
 and torsion angles; correlations between esds in cell parameters are only 
 used when they are defined by crystal symmetry.  An approximate (isotropic) 
 treatment of cell esds is used for estimating esds involving l.s. planes. 
; 
 
loop_ 
 _geom_bond_atom_site_label_1 
 _geom_bond_atom_site_label_2 
 _geom_bond_distance 
 _geom_bond_site_symmetry_2 
 _geom_bond_publ_flag 
Fe1 O1 1.926(2) . ? 
Fe1 O52 2.031(2) . ? 
Fe1 O11 2.058(2) . ? 
Fe1 O62 2.075(2) . ? 
Fe1 O21 2.111(2) . ? 
Fe1 N101 2.227(3) . ? 
Fe1 Fe2 3.2699(7) . ? 
Fe1 Fe3 3.3572(7) . ? 
Fe2 O1 1.834(2) . ? 
Fe2 O22 2.014(2) . ? 
Fe2 O31 2.014(2) . ? 
Fe2 O12 2.052(2) . ? 
Fe2 O41 2.054(2) . ? 
Fe2 N201 2.243(3) . ? 
Fe2 Fe3 3.2873(7) . ? 
Fe3 O1 1.965(2) . ? 
Fe3 O61 2.047(2) . ? 
Fe3 O42 2.062(2) . ? 
Fe3 O51 2.072(2) . ? 
Fe3 O32 2.113(2) . ? 
Fe3 N301 2.220(3) . ? 
O11 C10 1.254(4) . ? 
O12 C10 1.268(4) . ? 
O22 C20 1.261(4) . ? 
O21 C20 1.253(4) . ? 
O31 C30 1.267(4) . ? 
O32 C30 1.250(4) . ? 
O41 C40 1.268(4) . ? 
O42 C40 1.242(4) . ? 
O51 C50 1.251(4) . ? 
O52 C50 1.265(4) . ? 
O61 C60 1.266(4) . ? 
O62 C60 1.256(4) . ? 
N101 C106 1.344(4) . ? 
N101 C102 1.339(4) . ? 
N201 C202 1.333(4) . ? 
N201 C206 1.344(4) . ? 
N301 C306 1.338(4) . ? 
N301 C302 1.338(5) . ? 
C10 C13 1.529(4) . ? 
C13 C14 1.5336(10) . ? 
C13 C14A 1.5339(10) . ? 
C13 C15A 1.5338(10) . ? 
C13 C15 1.5337(10) . ? 
C13 C16 1.5333(10) . ? 
C13 C16A 1.5340(10) . ? 
C20 C23 1.532(5) . ? 
C23 C24 1.5340(10) . ? 
C23 C25A 1.5333(10) . ? 
C23 C26 1.5340(10) . ? 
C23 C26A 1.5341(10) . ? 
C23 C24A 1.5340(10) . ? 
C23 C25 1.5341(10) . ? 
C30 C33 1.524(5) . ? 
C33 C36A 1.5341(10) . ? 
C33 C35A 1.5339(10) . ? 
C33 C36 1.5333(10) . ? 
C33 C35 1.5348(10) . ? 
C33 C34 1.5337(10) . ? 
C33 C34A 1.5342(10) . ? 
C40 C43 1.530(4) . ? 
C43 C44 1.5337(10) . ? 
C43 C46 1.5339(10) . ? 
C43 C45 1.5339(10) . ? 
C50 C53 1.529(4) . ? 
C53 C55 1.5331(10) . ? 
C53 C54A 1.5340(10) . ? 
C53 C55A 1.5340(10) . ? 
C53 C54 1.5345(10) . ? 
C53 C56 1.5336(10) . ? 
C53 C56A 1.5340(10) . ? 
C60 C63 1.534(4) . ? 
C63 C66 1.528(5) . ? 
C63 C64 1.528(5) . ? 
C63 C65 1.525(5) . ? 
C102 C103 1.389(6) . ? 
C103 C104 1.380(7) . ? 
C104 C105 1.375(6) . ? 
C105 C106 1.383(5) . ? 
C202 C203 1.392(5) . ? 
C203 C204 1.374(5) . ? 
C204 C205 1.376(5) . ? 
C205 C206 1.396(5) . ? 
C302 C303 1.400(5) . ? 
C303 C304 1.378(6) . ? 
C304 C305 1.371(7) . ? 
C305 C306 1.389(6) . ? 
 
loop_ 
 _geom_angle_atom_site_label_1 
 _geom_angle_atom_site_label_2 
 _geom_angle_atom_site_label_3 
 _geom_angle 
 _geom_angle_site_symmetry_1 
 _geom_angle_site_symmetry_3 
 _geom_angle_publ_flag 
O1 Fe1 O52 94.69(9) . . ? 
O1 Fe1 O11 96.30(9) . . ? 
O52 Fe1 O11 168.74(10) . . ? 
O1 Fe1 O62 93.43(9) . . ? 
O52 Fe1 O62 93.34(10) . . ? 
O11 Fe1 O62 88.41(10) . . ? 
O1 Fe1 O21 94.05(9) . . ? 
O52 Fe1 O21 88.45(10) . . ? 
O11 Fe1 O21 88.37(10) . . ? 
O62 Fe1 O21 172.14(9) . . ? 
O1 Fe1 N101 176.58(10) . . ? 
O52 Fe1 N101 82.04(9) . . ? 
O11 Fe1 N101 87.00(10) . . ? 
O62 Fe1 N101 85.76(9) . . ? 
O21 Fe1 N101 86.91(10) . . ? 
O1 Fe1 Fe2 28.78(6) . . ? 
O52 Fe1 Fe2 115.54(7) . . ? 
O11 Fe1 Fe2 74.01(7) . . ? 
O62 Fe1 Fe2 110.32(7) . . ? 
O21 Fe1 Fe2 75.62(7) . . ? 
N101 Fe1 Fe2 154.31(7) . . ? 
O1 Fe1 Fe3 30.68(6) . . ? 
O52 Fe1 Fe3 71.66(6) . . ? 
O11 Fe1 Fe3 119.47(7) . . ? 
O62 Fe1 Fe3 75.16(6) . . ? 
O21 Fe1 Fe3 112.65(7) . . ? 
N101 Fe1 Fe3 146.15(7) . . ? 
Fe2 Fe1 Fe3 59.459(13) . . ? 
O1 Fe2 O22 97.67(9) . . ? 
O1 Fe2 O31 95.88(9) . . ? 
O22 Fe2 O31 166.44(9) . . ? 
O1 Fe2 O12 95.64(9) . . ? 
O22 Fe2 O12 88.87(10) . . ? 
O31 Fe2 O12 89.39(10) . . ? 
O1 Fe2 O41 97.69(9) . . ? 
O22 Fe2 O41 87.82(10) . . ? 
O31 Fe2 O41 90.78(10) . . ? 
O12 Fe2 O41 166.58(9) . . ? 
O1 Fe2 N201 178.36(10) . . ? 
O22 Fe2 N201 83.22(10) . . ? 
O31 Fe2 N201 83.22(10) . . ? 
O12 Fe2 N201 82.99(9) . . ? 
O41 Fe2 N201 83.71(9) . . ? 
O1 Fe2 Fe1 30.37(6) . . ? 
O22 Fe2 Fe1 74.29(7) . . ? 
O31 Fe2 Fe1 118.26(7) . . ? 
O12 Fe2 Fe1 76.19(6) . . ? 
O41 Fe2 Fe1 115.28(7) . . ? 
N201 Fe2 Fe1 149.40(7) . . ? 
O1 Fe2 Fe3 31.23(6) . . ? 
O22 Fe2 Fe3 120.39(7) . . ? 
O31 Fe2 Fe3 72.35(7) . . ? 
O12 Fe2 Fe3 114.86(7) . . ? 
O41 Fe2 Fe3 77.89(6) . . ? 
N201 Fe2 Fe3 148.95(7) . . ? 
Fe1 Fe2 Fe3 61.592(15) . . ? 
O1 Fe3 O61 95.11(9) . . ? 
O1 Fe3 O42 94.31(9) . . ? 
O61 Fe3 O42 170.19(10) . . ? 
O1 Fe3 O51 92.41(9) . . ? 
O61 Fe3 O51 93.73(10) . . ? 
O42 Fe3 O51 88.58(10) . . ? 
O1 Fe3 O32 93.36(9) . . ? 
O61 Fe3 O32 86.60(10) . . ? 
O42 Fe3 O32 90.14(10) . . ? 
O51 Fe3 O32 174.17(9) . . ? 
O1 Fe3 N301 174.39(10) . . ? 
O61 Fe3 N301 88.01(10) . . ? 
O42 Fe3 N301 82.82(10) . . ? 
O51 Fe3 N301 82.72(10) . . ? 
O32 Fe3 N301 91.47(10) . . ? 
O1 Fe3 Fe2 28.94(6) . . ? 
O61 Fe3 Fe2 116.92(7) . . ? 
O42 Fe3 Fe2 71.13(7) . . ? 
O51 Fe3 Fe2 108.31(7) . . ? 
O32 Fe3 Fe2 76.61(7) . . ? 
N301 Fe3 Fe2 151.08(7) . . ? 
O1 Fe3 Fe1 30.01(6) . . ? 
O61 Fe3 Fe1 72.15(6) . . ? 
O42 Fe3 Fe1 117.64(7) . . ? 
O51 Fe3 Fe1 75.23(6) . . ? 
O32 Fe3 Fe1 110.35(7) . . ? 
N301 Fe3 Fe1 148.95(7) . . ? 
Fe2 Fe3 Fe1 58.949(14) . . ? 
Fe2 O1 Fe1 120.85(10) . . ? 
Fe2 O1 Fe3 119.84(10) . . ? 
Fe1 O1 Fe3 119.31(11) . . ? 
C10 O11 Fe1 131.3(2) . . ? 
C10 O12 Fe2 129.2(2) . . ? 
C20 O22 Fe2 133.4(2) . . ? 
C20 O21 Fe1 127.9(2) . . ? 
C30 O31 Fe2 133.2(2) . . ? 
C30 O32 Fe3 125.6(2) . . ? 
C40 O41 Fe2 125.7(2) . . ? 
C40 O42 Fe3 133.3(2) . . ? 
C50 O51 Fe3 128.2(2) . . ? 
C50 O52 Fe1 132.0(2) . . ? 
C60 O61 Fe3 130.7(2) . . ? 
C60 O62 Fe1 128.6(2) . . ? 
C106 N101 C102 117.8(3) . . ? 
C106 N101 Fe1 119.2(2) . . ? 
C102 N101 Fe1 122.7(2) . . ? 
C202 N201 C206 117.8(3) . . ? 
C202 N201 Fe2 121.1(2) . . ? 
C206 N201 Fe2 121.1(2) . . ? 
C306 N301 C302 117.2(3) . . ? 
C306 N301 Fe3 122.4(2) . . ? 
C302 N301 Fe3 119.8(2) . . ? 
O11 C10 O12 125.9(3) . . ? 
O11 C10 C13 117.1(3) . . ? 
O12 C10 C13 117.1(3) . . ? 
C10 C13 C14 108.9(3) . . ? 
C10 C13 C14A 110.7(14) . . ? 
C14 C13 C14A 63.6(4) . . ? 
C10 C13 C15A 119.9(15) . . ? 
C14 C13 C15A 44.7(5) . . ? 
C14A C13 C15A 100.3(12) . . ? 
C10 C13 C15 106.5(3) . . ? 
C14 C13 C15 108.1(3) . . ? 
C14A C13 C15 142.5(15) . . ? 
C15A C13 C15 63.4(4) . . ? 
C10 C13 C16 112.6(3) . . ? 
C14 C13 C16 110.0(3) . . ? 
C14A C13 C16 50.1(8) . . ? 
C15A C13 C16 126.7(15) . . ? 
C15 C13 C16 110.6(3) . . ? 
C10 C13 C16A 105.1(13) . . ? 
C14 C13 C16A 144.8(14) . . ? 
C14A C13 C16A 111.9(11) . . ? 
C15A C13 C16A 109.0(14) . . ? 
C15 C13 C16A 52.3(8) . . ? 
C16 C13 C16A 63.2(4) . . ? 
O21 C20 O22 125.5(3) . . ? 
O21 C20 C23 119.6(3) . . ? 
O22 C20 C23 114.9(3) . . ? 
C24 C23 C20 112.4(13) . . ? 
C24 C23 C25A 135.6(13) . . ? 
C20 C23 C25A 111.6(3) . . ? 
C24 C23 C26 107.6(10) . . ? 
C20 C23 C26 106.3(13) . . ? 
C25A C23 C26 63.9(7) . . ? 
C24 C23 C26A 60.7(6) . . ? 
C20 C23 C26A 107.9(3) . . ? 
C25A C23 C26A 109.5(4) . . ? 
C26 C23 C26A 50.1(4) . . ? 
C24 C23 C24A 49.7(4) . . ? 
C20 C23 C24A 108.5(3) . . ? 
C25A C23 C24A 110.1(4) . . ? 
C26 C23 C24A 144.0(12) . . ? 
C26A C23 C24A 109.1(4) . . ? 
C24 C23 C25 110.4(12) . . ? 
C20 C23 C25 107.2(13) . . ? 
C25A C23 C25 50.1(4) . . ? 
C26 C23 C25 112.9(10) . . ? 
C26A C23 C25 144.2(12) . . ? 
C24A C23 C25 64.7(8) . . ? 
O32 C30 O31 125.7(3) . . ? 
O32 C30 C33 118.9(3) . . ? 
O31 C30 C33 115.3(3) . . ? 
C30 C33 C36A 109.6(19) . . ? 
C30 C33 C35A 122.9(18) . . ? 
C36A C33 C35A 97(2) . . ? 
C30 C33 C36 111.6(3) . . ? 
C36A C33 C36 41.8(4) . . ? 
C35A C33 C36 121.3(18) . . ? 
C30 C33 C35 104.3(3) . . ? 
C36A C33 C35 67.7(8) . . ? 
C35A C33 C35 41.8(4) . . ? 
C36 C33 C35 107.6(4) . . ? 
C30 C33 C34 111.6(3) . . ? 
C36A C33 C34 138.1(18) . . ? 
C35A C33 C34 66.7(5) . . ? 
C36 C33 C34 113.0(4) . . ? 
C35 C33 C34 108.3(3) . . ? 
C30 C33 C34A 94.3(17) . . ? 
C36A C33 C34A 128.2(17) . . ? 
C35A C33 C34A 107.9(7) . . ? 
C36 C33 C34A 87.0(15) . . ? 
C35 C33 C34A 149.6(6) . . ? 
C34 C33 C34A 41.6(4) . . ? 
O42 C40 O41 126.1(3) . . ? 
O42 C40 C43 118.3(3) . . ? 
O41 C40 C43 115.6(3) . . ? 
C40 C43 C44 106.9(3) . . ? 
C40 C43 C46 109.2(3) . . ? 
C44 C43 C46 110.5(4) . . ? 
C40 C43 C45 110.5(3) . . ? 
C44 C43 C45 110.3(4) . . ? 
C46 C43 C45 109.6(4) . . ? 
O52 C50 O51 126.0(3) . . ? 
O52 C50 C53 117.4(3) . . ? 
O51 C50 C53 116.6(2) . . ? 
C50 C53 C55 111.7(3) . . ? 
C50 C53 C54A 108(4) . . ? 
C55 C53 C54A 56.9(14) . . ? 
C50 C53 C55A 91(3) . . ? 
C55 C53 C55A 54.2(4) . . ? 
C54A C53 C55A 110.7(12) . . ? 
C50 C53 C54 105.4(3) . . ? 
C55 C53 C54 108.4(4) . . ? 
C54A C53 C54 54.3(4) . . ? 
C55A C53 C54 160.5(19) . . ? 
C50 C53 C56 110.8(3) . . ? 
C55 C53 C56 113.1(4) . . ? 
C54A C53 C56 141(3) . . ? 
C55A C53 C56 76(3) . . ? 
C54 C53 C56 107.0(4) . . ? 
C50 C53 C56A 118(3) . . ? 
C55 C53 C56A 130(4) . . ? 
C54A C53 C56A 100(3) . . ? 
C55A C53 C56A 129(3) . . ? 
C54 C53 C56A 52.8(6) . . ? 
C56 C53 C56A 54.4(4) . . ? 
O62 C60 O61 126.1(3) . . ? 
O62 C60 C63 116.2(3) . . ? 
O61 C60 C63 117.8(3) . . ? 
C66 C63 C64 109.3(3) . . ? 
C66 C63 C65 110.6(3) . . ? 
C64 C63 C65 109.8(3) . . ? 
C66 C63 C60 110.9(3) . . ? 
C64 C63 C60 108.5(3) . . ? 
C65 C63 C60 107.8(3) . . ? 
N101 C102 C103 122.7(4) . . ? 
C102 C103 C104 118.9(4) . . ? 
C105 C104 C103 118.6(4) . . ? 
C104 C105 C106 119.4(4) . . ? 
N101 C106 C105 122.5(3) . . ? 
N201 C202 C203 122.7(3) . . ? 
C204 C203 C202 118.9(3) . . ? 
C203 C204 C205 119.5(3) . . ? 
C204 C205 C206 118.2(3) . . ? 
N201 C206 C205 122.9(3) . . ? 
N301 C302 C303 123.0(3) . . ? 
C304 C303 C302 118.5(4) . . ? 
C303 C304 C305 119.0(4) . . ? 
C304 C305 C306 119.0(4) . . ? 
N301 C306 C305 123.3(4) . . ? 
 
_diffrn_measured_fraction_theta_max    0.912 
_diffrn_reflns_theta_full              29.31 
_diffrn_measured_fraction_theta_full   0.912 
_refine_diff_density_max    0.926 
_refine_diff_density_min   -0.767 
_refine_diff_density_rms    0.071 
#===END
 
data_fe118 
 
_audit_creation_method            SHELXL-97 
_chemical_name_systematic 
; 
 ? 
; 
_chemical_name_common             ? 
_chemical_melting_point           ? 
_chemical_formula_moiety          ? 
_chemical_formula_sum 
 'C45 H69 Fe3 N3 O13' 
_chemical_formula_weight          1027.58 
 
loop_ 
 _atom_type_symbol 
 _atom_type_description 
 _atom_type_scat_dispersion_real 
 _atom_type_scat_dispersion_imag 
 _atom_type_scat_source 
 'C'  'C'   0.0033   0.0016 
 'International Tables Vol C Tables 4.2.6.8 and 6.1.1.4' 
 'H'  'H'   0.0000   0.0000 
 'International Tables Vol C Tables 4.2.6.8 and 6.1.1.4' 
 'N'  'N'   0.0061   0.0033 
 'International Tables Vol C Tables 4.2.6.8 and 6.1.1.4' 
 'O'  'O'   0.0106   0.0060 
 'International Tables Vol C Tables 4.2.6.8 and 6.1.1.4' 
 'Fe'  'Fe'   0.3463   0.8444 
 'International Tables Vol C Tables 4.2.6.8 and 6.1.1.4' 
 
_symmetry_cell_setting            ? 
_symmetry_space_group_name_H-M    ? 
 
loop_ 
 _symmetry_equiv_pos_as_xyz 
 'x, y, z' 
 '-x, y+1/2, -z' 
 
_cell_length_a                    11.6346(10) 
_cell_length_b                    19.807(2) 
_cell_length_c                    11.8067(10) 
_cell_angle_alpha                 90.00 
_cell_angle_beta                  106.903(2) 
_cell_angle_gamma                 90.00 
_cell_volume                      2603.2(4) 
_cell_formula_units_Z             2 
_cell_measurement_temperature     293(2) 
_cell_measurement_reflns_used     ? 
_cell_measurement_theta_min       ? 
_cell_measurement_theta_max       ? 
 
_exptl_crystal_description        ? 
_exptl_crystal_colour             ? 
_exptl_crystal_size_max           ? 
_exptl_crystal_size_mid           ? 
_exptl_crystal_size_min           ? 
_exptl_crystal_density_meas       ? 
_exptl_crystal_density_diffrn     1.311 
_exptl_crystal_density_method     'not measured' 
_exptl_crystal_F_000              1084 
_exptl_absorpt_coefficient_mu     0.884 
_exptl_absorpt_correction_type    ? 
_exptl_absorpt_correction_T_min   ? 
_exptl_absorpt_correction_T_max   ? 
_exptl_absorpt_process_details    ? 
 
_exptl_special_details 
; 
 ? 
; 
 
_diffrn_ambient_temperature       293(2) 
_diffrn_radiation_wavelength      0.71073 
_diffrn_radiation_type            MoK\a 
_diffrn_radiation_source          'fine-focus sealed tube' 
_diffrn_radiation_monochromator   graphite 
_diffrn_measurement_device_type   ? 
_diffrn_measurement_method        ? 
_diffrn_detector_area_resol_mean  ? 
_diffrn_standards_number          ? 
_diffrn_standards_interval_count  ? 
_diffrn_standards_interval_time   ? 
_diffrn_standards_decay_%         ? 
_diffrn_reflns_number             12281 
_diffrn_reflns_av_R_equivalents   0.0000 
_diffrn_reflns_av_sigmaI/netI     0.0703 
_diffrn_reflns_limit_h_min        -16 
_diffrn_reflns_limit_h_max        15 
_diffrn_reflns_limit_k_min        -26 
_diffrn_reflns_limit_k_max        26 
_diffrn_reflns_limit_l_min        0 
_diffrn_reflns_limit_l_max        16 
_diffrn_reflns_theta_min          2.16 
_diffrn_reflns_theta_max          29.86 
_reflns_number_total              12281 
_reflns_number_gt                 10769 
_reflns_threshold_expression      >2sigma(I) 
 
_computing_data_collection        ? 
_computing_cell_refinement        ? 
_computing_data_reduction         ? 
_computing_structure_solution     'SHELXS-97 (Sheldrick, 1990)' 
_computing_structure_refinement   'SHELXL-97 (Sheldrick, 1997)' 
_computing_molecular_graphics     ? 
_computing_publication_material   ? 
 
_refine_special_details 
; 
 Refinement of F^2^ against ALL reflections.  The weighted R-factor wR and 
 goodness of fit S are based on F^2^, conventional R-factors R are based 
 on F, with F set to zero for negative F^2^. The threshold expression of 
 F^2^ > 2sigma(F^2^) is used only for calculating R-factors(gt) etc. and is 
 not relevant to the choice of reflections for refinement.  R-factors based 
 on F^2^ are statistically about twice as large as those based on F, and R- 
 factors based on ALL data will be even larger. 
; 
 
_refine_ls_structure_factor_coef  Fsqd  
_refine_ls_matrix_type            full 
_refine_ls_weighting_scheme       calc  
_refine_ls_weighting_details 
 'calc w=1/[\s^2^(Fo^2^)+(0.0331P)^2^+2.3436P] where P=(Fo^2^+2Fc^2^)/3' 
_atom_sites_solution_primary      direct 
_atom_sites_solution_secondary    difmap 
_atom_sites_solution_hydrogens    geom 
_refine_ls_hydrogen_treatment     mixed 
_refine_ls_extinction_method      none 
_refine_ls_extinction_coef        ? 
_refine_ls_abs_structure_details 
 'Flack H D (1983), Acta Cryst. A39, 876-881' 
_refine_ls_abs_structure_Flack    -0.010(16) 
_refine_ls_number_reflns          12281 
_refine_ls_number_parameters      517 
_refine_ls_number_restraints      40 
_refine_ls_R_factor_all           0.0703 
_refine_ls_R_factor_gt            0.0581 
_refine_ls_wR_factor_ref          0.1406 
_refine_ls_wR_factor_gt           0.1316 
_refine_ls_goodness_of_fit_ref    1.251 
_refine_ls_restrained_S_all       1.249 
_refine_ls_shift/su_max           0.079 
_refine_ls_shift/su_mean          0.003 
 
loop_ 
 _atom_site_label 
 _atom_site_type_symbol 
 _atom_site_fract_x 
 _atom_site_fract_y 
 _atom_site_fract_z 
 _atom_site_U_iso_or_equiv 
 _atom_site_adp_type 
 _atom_site_occupancy 
 _atom_site_symmetry_multiplicity 
 _atom_site_calc_flag 
 _atom_site_refinement_flags 
 _atom_site_disorder_assembly 
 _atom_site_disorder_group 
Fe1 Fe 0.88067(6) 0.17798(8) 0.26369(5) 0.02466(13) Uani 1 1 d . . . 
Fe2 Fe 0.74423(5) 0.03727(8) 0.29147(5) 0.02224(12) Uani 1 1 d . . . 
Fe3 Fe 0.57934(6) 0.16937(8) 0.17823(5) 0.02538(14) Uani 1 1 d . . . 
O1 O 0.7368(2) 0.12620(15) 0.2462(2) 0.0199(5) Uani 1 1 d . . . 
O11 O 0.9751(3) 0.13826(18) 0.4225(3) 0.0304(7) Uani 1 1 d . . . 
O12 O 0.8614(3) 0.05274(17) 0.4539(3) 0.0277(6) Uani 1 1 d . . . 
O22 O 0.8839(3) 0.00979(17) 0.2340(3) 0.0286(7) Uani 1 1 d . . . 
O21 O 0.9621(3) 0.10462(17) 0.1831(3) 0.0312(7) Uani 1 1 d . . . 
O31 O 0.6063(3) 0.04195(18) 0.3613(3) 0.0285(6) Uani 1 1 d . . . 
O32 O 0.5154(3) 0.14240(17) 0.3211(3) 0.0290(7) Uani 1 1 d . . . 
O41 O 0.6335(3) -0.00142(16) 0.1393(3) 0.0271(6) Uani 1 1 d . . . 
O42 O 0.5020(3) 0.08368(17) 0.0893(3) 0.0317(7) Uani 1 1 d . . . 
O51 O 0.6259(3) 0.19888(18) 0.0303(3) 0.0290(7) Uani 1 1 d . . . 
O52 O 0.8206(3) 0.22469(17) 0.1065(3) 0.0276(6) Uani 1 1 d . . . 
O61 O 0.6281(3) 0.26007(17) 0.2614(3) 0.0278(6) Uani 1 1 d . . . 
O62 O 0.8256(3) 0.25565(17) 0.3525(3) 0.0268(6) Uani 1 1 d . . . 
N101 N 1.0420(3) 0.2421(2) 0.2750(3) 0.0245(7) Uani 1 1 d . . . 
N201 N 0.7539(3) -0.07055(19) 0.3514(3) 0.0251(7) Uani 1 1 d . . . 
N301 N 0.4041(4) 0.2152(2) 0.0837(3) 0.0289(8) Uani 1 1 d . . . 
C10 C 0.9469(4) 0.0946(2) 0.4864(4) 0.0234(8) Uani 1 1 d . A . 
C13 C 1.0219(3) 0.09257(17) 0.6144(3) 0.0288(9) Uani 1 1 d D . . 
C14 C 1.1553(4) 0.0929(4) 0.6205(6) 0.0498(10) Uiso 0.892(6) 1 d PD A 1 
H14A H 1.1726 0.0545 0.5785 0.075 Uiso 0.892(6) 1 calc PR A 1 
H14B H 1.2033 0.0908 0.7017 0.075 Uiso 0.892(6) 1 calc PR A 1 
H14C H 1.1737 0.1335 0.5850 0.075 Uiso 0.892(6) 1 calc PR A 1 
C15 C 0.9962(6) 0.1584(2) 0.6710(6) 0.0498(10) Uiso 0.892(6) 1 d PD A 1 
H15A H 1.0410 0.1589 0.7533 0.075 Uiso 0.892(6) 1 calc PR A 1 
H15B H 0.9119 0.1613 0.6634 0.075 Uiso 0.892(6) 1 calc PR A 1 
H15C H 1.0196 0.1961 0.6318 0.075 Uiso 0.892(6) 1 calc PR A 1 
C16 C 0.9935(6) 0.0307(3) 0.6796(5) 0.0498(10) Uiso 0.892(6) 1 d PD A 1 
H16A H 1.0025 -0.0096 0.6377 0.075 Uiso 0.892(6) 1 calc PR A 1 
H16B H 0.9124 0.0337 0.6837 0.075 Uiso 0.892(6) 1 calc PR A 1 
H16C H 1.0478 0.0292 0.7583 0.075 Uiso 0.892(6) 1 calc PR A 1 
C14A C 1.0882(17) 0.0248(6) 0.641(5) 0.0498(10) Uiso 0.108(6) 1 d PD A 2 
H14D H 1.0315 -0.0115 0.6179 0.075 Uiso 0.108(6) 1 calc PR A 2 
H14E H 1.1291 0.0217 0.7237 0.075 Uiso 0.108(6) 1 calc PR A 2 
H14F H 1.1456 0.0218 0.5966 0.075 Uiso 0.108(6) 1 calc PR A 2 
C15A C 1.1294(11) 0.1390(14) 0.668(4) 0.0498(10) Uiso 0.108(6) 1 d PD A 2 
H15D H 1.1066 0.1850 0.6486 0.075 Uiso 0.108(6) 1 calc PR A 2 
H15E H 1.1945 0.1271 0.6375 0.075 Uiso 0.108(6) 1 calc PR A 2 
H15F H 1.1546 0.1338 0.7529 0.075 Uiso 0.108(6) 1 calc PR A 2 
C16A C 0.933(4) 0.1031(9) 0.687(4) 0.0498(10) Uiso 0.108(6) 1 d PD A 2 
H16D H 0.8985 0.1473 0.6716 0.075 Uiso 0.108(6) 1 calc PR A 2 
H16E H 0.9748 0.0987 0.7696 0.075 Uiso 0.108(6) 1 calc PR A 2 
H16F H 0.8707 0.0697 0.6647 0.075 Uiso 0.108(6) 1 calc PR A 2 
C20 C 0.9510(4) 0.0419(2) 0.1848(3) 0.0248(8) Uani 1 1 d . B . 
C23 C 1.0226(4) -0.0030(2) 0.1241(4) 0.0335(10) Uani 1 1 d D . . 
C24 C 0.983(3) -0.0770(5) 0.1214(17) 0.0539(11) Uiso 0.168(6) 1 d PD B 1 
H24A H 0.9794 -0.0900 0.1987 0.081 Uiso 0.168(6) 1 calc PR B 1 
H24B H 1.0397 -0.1051 0.0987 0.081 Uiso 0.168(6) 1 calc PR B 1 
H24C H 0.9051 -0.0821 0.0654 0.081 Uiso 0.168(6) 1 calc PR B 1 
C25 C 0.9998(16) 0.0295(17) 0.0015(13) 0.0539(11) Uiso 0.168(6) 1 d PD B 1 
H25A H 1.0292 0.0751 0.0103 0.081 Uiso 0.168(6) 1 calc PR B 1 
H25B H 0.9151 0.0296 -0.0382 0.081 Uiso 0.168(6) 1 calc PR B 1 
H25C H 1.0407 0.0041 -0.0443 0.081 Uiso 0.168(6) 1 calc PR B 1 
C26 C 1.1559(9) -0.0003(12) 0.195(3) 0.0539(11) Uiso 0.168(6) 1 d PD B 1 
H26A H 1.1794 0.0458 0.2135 0.081 Uiso 0.168(6) 1 calc PR B 1 
H26B H 1.2033 -0.0195 0.1487 0.081 Uiso 0.168(6) 1 calc PR B 1 
H26C H 1.1683 -0.0255 0.2669 0.081 Uiso 0.168(6) 1 calc PR B 1 
C24A C 0.9328(6) -0.0434(4) 0.0268(6) 0.0539(11) Uiso 0.832(6) 1 d PD B 2 
H24D H 0.8854 -0.0129 -0.0315 0.081 Uiso 0.832(6) 1 calc PR B 2 
H24E H 0.8812 -0.0689 0.0610 0.081 Uiso 0.832(6) 1 calc PR B 2 
H24F H 0.9757 -0.0735 -0.0100 0.081 Uiso 0.832(6) 1 calc PR B 2 
C25A C 1.1065(6) 0.0391(4) 0.0731(6) 0.0539(11) Uiso 0.832(6) 1 d PD B 2 
H25D H 1.0612 0.0739 0.0230 0.081 Uiso 0.832(6) 1 calc PR B 2 
H25E H 1.1430 0.0104 0.0277 0.081 Uiso 0.832(6) 1 calc PR B 2 
H25F H 1.1679 0.0593 0.1366 0.081 Uiso 0.832(6) 1 calc PR B 2 
C26A C 1.0978(6) -0.0527(3) 0.2156(6) 0.0539(11) Uiso 0.832(6) 1 d PD B 2 
H26D H 1.1433 -0.0283 0.2843 0.081 Uiso 0.832(6) 1 calc PR B 2 
H26E H 1.1516 -0.0767 0.1819 0.081 Uiso 0.832(6) 1 calc PR B 2 
H26F H 1.0455 -0.0842 0.2379 0.081 Uiso 0.832(6) 1 calc PR B 2 
C30 C 0.5428(4) 0.0896(2) 0.3815(4) 0.0239(8) Uani 1 1 d . C . 
C33 C 0.4921(4) 0.07971(19) 0.4840(4) 0.0362(11) Uani 1 1 d D . . 
C34 C 0.5725(6) 0.0323(3) 0.5762(5) 0.0541(11) Uiso 0.892(7) 1 d PD C 1 
H34A H 0.5844 -0.0090 0.5385 0.081 Uiso 0.892(7) 1 calc PR C 1 
H34B H 0.5346 0.0226 0.6366 0.081 Uiso 0.892(7) 1 calc PR C 1 
H34C H 0.6487 0.0535 0.6112 0.081 Uiso 0.892(7) 1 calc PR C 1 
C35 C 0.3717(5) 0.0435(4) 0.4320(6) 0.0541(11) Uiso 0.892(7) 1 d PD C 1 
H35A H 0.3850 0.0017 0.3966 0.081 Uiso 0.892(7) 1 calc PR C 1 
H35B H 0.3192 0.0716 0.3730 0.081 Uiso 0.892(7) 1 calc PR C 1 
H35C H 0.3356 0.0345 0.4939 0.081 Uiso 0.892(7) 1 calc PR C 1 
C36 C 0.4660(7) 0.1472(2) 0.5350(6) 0.0541(11) Uiso 0.892(7) 1 d PD C 1 
H36A H 0.4267 0.1771 0.4715 0.081 Uiso 0.892(7) 1 calc PR C 1 
H36B H 0.5400 0.1672 0.5810 0.081 Uiso 0.892(7) 1 calc PR C 1 
H36C H 0.4148 0.1397 0.5846 0.081 Uiso 0.892(7) 1 calc PR C 1 
C34A C 0.616(2) 0.0812(12) 0.576(4) 0.0541(11) Uiso 0.108(7) 1 d PD C 2 
H34D H 0.6536 0.1240 0.5730 0.081 Uiso 0.108(7) 1 calc PR C 2 
H34E H 0.6651 0.0458 0.5598 0.081 Uiso 0.108(7) 1 calc PR C 2 
H34F H 0.6069 0.0748 0.6538 0.081 Uiso 0.108(7) 1 calc PR C 2 
C35A C 0.433(2) 0.0130(13) 0.502(4) 0.0541(11) Uiso 0.108(7) 1 d PD C 2 
H35D H 0.4838 -0.0240 0.4955 0.081 Uiso 0.108(7) 1 calc PR C 2 
H35E H 0.3568 0.0086 0.4419 0.081 Uiso 0.108(7) 1 calc PR C 2 
H35F H 0.4201 0.0126 0.5784 0.081 Uiso 0.108(7) 1 calc PR C 2 
C36A C 0.3858(16) 0.1281(16) 0.469(4) 0.0541(11) Uiso 0.108(7) 1 d PD C 2 
H36D H 0.4125 0.1737 0.4660 0.081 Uiso 0.108(7) 1 calc PR C 2 
H36E H 0.3535 0.1231 0.5346 0.081 Uiso 0.108(7) 1 calc PR C 2 
H36F H 0.3247 0.1177 0.3967 0.081 Uiso 0.108(7) 1 calc PR C 2 
C40 C 0.5428(4) 0.0277(2) 0.0723(4) 0.0265(8) Uani 1 1 d . . . 
C43 C 0.4766(4) -0.0120(2) -0.0373(4) 0.0446(14) Uani 1 1 d D . . 
C44 C 0.4181(6) -0.0734(3) 0.0027(7) 0.0632(10) Uiso 1 1 d D . . 
H44A H 0.4780 -0.0984 0.0606 0.095 Uiso 1 1 calc R . . 
H44B H 0.3828 -0.1018 -0.0643 0.095 Uiso 1 1 calc R . . 
H44C H 0.3570 -0.0585 0.0367 0.095 Uiso 1 1 calc R . . 
C45 C 0.3798(5) 0.0327(3) -0.1191(6) 0.0632(10) Uiso 1 1 d D . . 
H45A H 0.4163 0.0727 -0.1388 0.095 Uiso 1 1 calc R . . 
H45B H 0.3216 0.0451 -0.0795 0.095 Uiso 1 1 calc R . . 
H45C H 0.3408 0.0083 -0.1902 0.095 Uiso 1 1 calc R . . 
C46 C 0.5665(6) -0.0348(4) -0.1022(6) 0.0632(10) Uiso 1 1 d D . . 
H46A H 0.6043 0.0041 -0.1244 0.095 Uiso 1 1 calc R . . 
H46B H 0.5250 -0.0596 -0.1720 0.095 Uiso 1 1 calc R . . 
H46C H 0.6265 -0.0631 -0.0510 0.095 Uiso 1 1 calc R . . 
C50 C 0.7276(4) 0.2166(2) 0.0228(3) 0.0233(8) Uani 1 1 d . D . 
C53 C 0.7380(3) 0.22688(19) -0.1006(4) 0.0311(10) Uani 1 1 d D . . 
C54 C 0.7447(7) 0.1555(2) -0.1489(7) 0.0643(13) Uiso 0.924(7) 1 d PD D 1 
H54A H 0.6763 0.1298 -0.1440 0.096 Uiso 0.924(7) 1 calc PR D 1 
H54B H 0.8170 0.1338 -0.1029 0.096 Uiso 0.924(7) 1 calc PR D 1 
H54C H 0.7450 0.1583 -0.2300 0.096 Uiso 0.924(7) 1 calc PR D 1 
C55 C 0.8532(5) 0.2647(4) -0.0998(7) 0.0643(13) Uiso 0.924(7) 1 d PD D 1 
H55A H 0.9205 0.2444 -0.0429 0.096 Uiso 0.924(7) 1 calc PR D 1 
H55B H 0.8465 0.3111 -0.0790 0.096 Uiso 0.924(7) 1 calc PR D 1 
H55C H 0.8646 0.2624 -0.1770 0.096 Uiso 0.924(7) 1 calc PR D 1 
C56 C 0.6241(5) 0.2601(4) -0.1804(6) 0.0643(13) Uiso 0.924(7) 1 d PD D 1 
H56A H 0.5587 0.2286 -0.1960 0.096 Uiso 0.924(7) 1 calc PR D 1 
H56B H 0.6375 0.2734 -0.2538 0.096 Uiso 0.924(7) 1 calc PR D 1 
H56C H 0.6047 0.2992 -0.1416 0.096 Uiso 0.924(7) 1 calc PR D 1 
C54A C 0.850(2) 0.1941(19) -0.121(8) 0.0643(13) Uiso 0.076(7) 1 d PD D 2 
H54D H 0.9206 0.2145 -0.0689 0.096 Uiso 0.076(7) 1 calc PR D 2 
H54E H 0.8491 0.2007 -0.2015 0.096 Uiso 0.076(7) 1 calc PR D 2 
H54F H 0.8499 0.1466 -0.1042 0.096 Uiso 0.076(7) 1 calc PR D 2 
C55A C 0.761(3) 0.3027(8) -0.078(8) 0.0643(13) Uiso 0.076(7) 1 d PD D 2 
H55D H 0.8208 0.3092 -0.0038 0.096 Uiso 0.076(7) 1 calc PR D 2 
H55E H 0.6874 0.3244 -0.0760 0.096 Uiso 0.076(7) 1 calc PR D 2 
H55F H 0.7876 0.3219 -0.1406 0.096 Uiso 0.076(7) 1 calc PR D 2 
C56A C 0.646(4) 0.1931(16) -0.206(5) 0.0643(13) Uiso 0.076(7) 1 d PD D 2 
H56D H 0.5685 0.1937 -0.1928 0.096 Uiso 0.076(7) 1 calc PR D 2 
H56E H 0.6701 0.1473 -0.2129 0.096 Uiso 0.076(7) 1 calc PR D 2 
H56F H 0.6430 0.2173 -0.2770 0.096 Uiso 0.076(7) 1 calc PR D 2 
C60 C 0.7211(4) 0.2771(2) 0.3405(3) 0.0207(8) Uani 1 1 d . . . 
C63 C 0.7066(4) 0.3290(2) 0.4313(4) 0.0256(8) Uani 1 1 d . . . 
C64 C 0.7662(5) 0.3004(3) 0.5534(4) 0.0378(11) Uiso 1 1 d . . . 
H64A H 0.7254 0.2599 0.5644 0.057 Uiso 1 1 calc R . . 
H64B H 0.7623 0.3329 0.6123 0.057 Uiso 1 1 calc R . . 
H64C H 0.8487 0.2902 0.5606 0.057 Uiso 1 1 calc R . . 
C65 C 0.7719(5) 0.3938(3) 0.4139(5) 0.0362(10) Uiso 1 1 d . . . 
H65A H 0.8540 0.3834 0.4193 0.054 Uiso 1 1 calc R . . 
H65B H 0.7696 0.4259 0.4740 0.054 Uiso 1 1 calc R . . 
H65C H 0.7330 0.4125 0.3373 0.054 Uiso 1 1 calc R . . 
C66 C 0.5742(5) 0.3432(3) 0.4170(5) 0.0414(12) Uiso 1 1 d . . . 
H66A H 0.5350 0.3023 0.4288 0.062 Uiso 1 1 calc R . . 
H66B H 0.5367 0.3602 0.3388 0.062 Uiso 1 1 calc R . . 
H66C H 0.5676 0.3762 0.4744 0.062 Uiso 1 1 calc R . . 
C102 C 1.1525(4) 0.2161(3) 0.2948(4) 0.0332(10) Uani 1 1 d . . . 
H10A H 1.1637 0.1702 0.3111 0.040 Uiso 1 1 calc R . . 
C103 C 1.2504(5) 0.2547(3) 0.2918(5) 0.0416(12) Uani 1 1 d . . . 
H10B H 1.3257 0.2350 0.3050 0.050 Uiso 1 1 calc R . . 
C104 C 1.2348(5) 0.3235(3) 0.2688(5) 0.0437(13) Uani 1 1 d . . . 
H10C H 1.2994 0.3507 0.2669 0.052 Uiso 1 1 calc R . . 
C105 C 1.1220(5) 0.3504(3) 0.2490(5) 0.0384(11) Uani 1 1 d . . . 
H10D H 1.1090 0.3962 0.2340 0.046 Uiso 1 1 calc R . . 
C106 C 1.0274(4) 0.3082(2) 0.2517(4) 0.0292(9) Uani 1 1 d . . . 
H10E H 0.9509 0.3267 0.2367 0.035 Uiso 1 1 calc R . . 
C202 C 0.6548(4) -0.1068(2) 0.3399(4) 0.0296(9) Uani 1 1 d . . . 
H20A H 0.5807 -0.0865 0.3064 0.036 Uiso 1 1 calc R . . 
C203 C 0.6570(5) -0.1739(2) 0.3760(4) 0.0347(10) Uani 1 1 d . . . 
H20B H 0.5860 -0.1977 0.3672 0.042 Uiso 1 1 calc R . . 
C204 C 0.7661(5) -0.2042(2) 0.4245(4) 0.0370(11) Uani 1 1 d . . . 
H20C H 0.7700 -0.2491 0.4482 0.044 Uiso 1 1 calc R . . 
C205 C 0.8704(4) -0.1675(2) 0.4382(4) 0.0318(9) Uani 1 1 d . . . 
H20D H 0.9453 -0.1871 0.4717 0.038 Uiso 1 1 calc R . . 
C206 C 0.8606(4) -0.1005(2) 0.4006(4) 0.0278(9) Uani 1 1 d . . . 
H20E H 0.9305 -0.0756 0.4098 0.033 Uiso 1 1 calc R . . 
C302 C 0.4012(4) 0.2753(2) 0.0299(4) 0.0328(10) Uani 1 1 d . . . 
H30A H 0.4722 0.2998 0.0445 0.039 Uiso 1 1 calc R . . 
C303 C 0.2979(5) 0.3024(3) -0.0461(5) 0.0413(12) Uani 1 1 d . . . 
H30B H 0.3002 0.3432 -0.0842 0.050 Uiso 1 1 calc R . . 
C304 C 0.1915(5) 0.2677(3) -0.0644(6) 0.0482(14) Uani 1 1 d . . . 
H30C H 0.1204 0.2853 -0.1137 0.058 Uiso 1 1 calc R . . 
C305 C 0.1922(5) 0.2065(3) -0.0084(6) 0.0490(14) Uani 1 1 d . . . 
H30D H 0.1216 0.1821 -0.0188 0.059 Uiso 1 1 calc R . . 
C306 C 0.3005(4) 0.1823(3) 0.0636(5) 0.0373(10) Uani 1 1 d . . . 
H30E H 0.3008 0.1406 0.1001 0.045 Uiso 1 1 calc R . . 
 
loop_ 
 _atom_site_aniso_label 
 _atom_site_aniso_U_11 
 _atom_site_aniso_U_22 
 _atom_site_aniso_U_33 
 _atom_site_aniso_U_23 
 _atom_site_aniso_U_13 
 _atom_site_aniso_U_12 
Fe1 0.0379(3) 0.0178(3) 0.0180(2) 0.0013(2) 0.0077(2) 0.0032(3) 
Fe2 0.0287(3) 0.0174(3) 0.0192(2) 0.0014(2) 0.0047(2) -0.0011(2) 
Fe3 0.0387(3) 0.0187(3) 0.0193(3) -0.0016(2) 0.0094(2) -0.0058(3) 
O1 0.0215(13) 0.0166(13) 0.0211(13) 0.0005(10) 0.0054(11) -0.0017(10) 
O11 0.0304(16) 0.0293(16) 0.0284(15) 0.0061(13) 0.0036(13) -0.0063(13) 
O12 0.0290(15) 0.0253(16) 0.0230(14) 0.0019(11) -0.0016(12) -0.0057(12) 
O22 0.0335(16) 0.0193(14) 0.0371(17) 0.0051(12) 0.0166(14) 0.0057(12) 
O21 0.0368(17) 0.0214(15) 0.0365(17) -0.0016(13) 0.0125(14) -0.0056(13) 
O31 0.0339(15) 0.0236(14) 0.0317(15) 0.0034(13) 0.0152(13) 0.0022(14) 
O32 0.0322(16) 0.0249(15) 0.0305(16) 0.0101(12) 0.0102(13) 0.0030(13) 
O41 0.0310(16) 0.0187(14) 0.0256(15) -0.0008(11) -0.0016(12) 0.0025(12) 
O42 0.0331(16) 0.0218(15) 0.0320(17) -0.0066(12) -0.0032(13) 0.0034(13) 
O51 0.0230(15) 0.0391(18) 0.0244(14) 0.0040(12) 0.0062(12) 0.0005(13) 
O52 0.0277(15) 0.0293(16) 0.0223(14) 0.0062(12) 0.0015(12) -0.0036(12) 
O61 0.0245(15) 0.0261(15) 0.0279(15) -0.0023(12) 0.0001(12) -0.0034(12) 
O62 0.0229(14) 0.0266(15) 0.0326(16) -0.0041(12) 0.0107(12) 0.0016(12) 
N101 0.0276(18) 0.0256(18) 0.0193(16) 0.0001(13) 0.0050(14) 0.0025(14) 
N201 0.0303(19) 0.0227(17) 0.0199(16) 0.0019(13) 0.0034(14) -0.0012(14) 
N301 0.035(2) 0.0224(18) 0.0327(19) -0.0037(15) 0.0148(16) -0.0032(15) 
C10 0.028(2) 0.0206(19) 0.0220(19) 0.0023(15) 0.0077(16) 0.0020(16) 
C13 0.033(2) 0.024(2) 0.023(2) 0.0041(16) -0.0025(17) 0.0016(18) 
C20 0.0272(19) 0.0219(19) 0.0237(18) -0.0008(16) 0.0047(15) 0.0003(17) 
C23 0.037(3) 0.028(2) 0.040(3) -0.0022(19) 0.018(2) -0.0006(19) 
C30 0.0232(19) 0.025(2) 0.0214(19) -0.0002(15) 0.0030(15) -0.0065(16) 
C33 0.045(3) 0.033(2) 0.039(3) 0.007(2) 0.026(2) 0.005(2) 
C40 0.031(2) 0.022(2) 0.0233(18) -0.0047(16) 0.0030(16) -0.0006(17) 
C43 0.051(3) 0.028(2) 0.037(3) -0.010(2) -0.014(2) 0.015(2) 
C50 0.029(2) 0.0215(19) 0.0200(18) 0.0010(15) 0.0076(16) 0.0024(16) 
C53 0.029(2) 0.043(3) 0.021(2) 0.0010(18) 0.0076(17) 0.0023(19) 
C60 0.028(2) 0.0172(18) 0.0185(17) 0.0028(14) 0.0084(15) -0.0036(15) 
C63 0.029(2) 0.022(2) 0.026(2) -0.0044(16) 0.0083(17) 0.0021(17) 
C102 0.032(2) 0.037(3) 0.028(2) -0.0022(19) 0.0045(18) 0.0070(19) 
C103 0.029(2) 0.060(4) 0.033(3) -0.003(2) 0.005(2) 0.001(2) 
C104 0.031(2) 0.063(4) 0.036(3) 0.001(2) 0.008(2) -0.011(2) 
C105 0.043(3) 0.032(2) 0.040(3) 0.007(2) 0.012(2) -0.006(2) 
C106 0.029(2) 0.028(2) 0.032(2) 0.0026(18) 0.0107(18) -0.0016(18) 
C202 0.033(2) 0.024(2) 0.028(2) 0.0039(17) 0.0026(18) -0.0049(18) 
C203 0.044(3) 0.021(2) 0.037(2) 0.0057(18) 0.007(2) -0.0084(19) 
C204 0.059(3) 0.020(2) 0.035(2) 0.0049(18) 0.017(2) -0.005(2) 
C205 0.036(2) 0.027(2) 0.032(2) 0.0051(18) 0.0094(19) 0.0063(18) 
C206 0.030(2) 0.027(2) 0.025(2) 0.0066(16) 0.0053(17) 0.0014(18) 
C302 0.030(2) 0.026(2) 0.041(3) 0.0046(19) 0.008(2) -0.0027(18) 
C303 0.043(3) 0.030(2) 0.046(3) 0.000(2) 0.007(2) 0.007(2) 
C304 0.038(3) 0.040(3) 0.059(4) -0.002(3) 0.002(3) 0.007(2) 
C305 0.034(3) 0.031(3) 0.076(4) -0.007(3) 0.005(3) -0.009(2) 
C306 0.035(2) 0.027(2) 0.050(3) -0.003(2) 0.013(2) -0.004(2) 
 
_geom_special_details 
; 
 All esds (except the esd in the dihedral angle between two l.s. planes) 
 are estimated using the full covariance matrix.  The cell esds are taken 
 into account individually in the estimation of esds in distances, angles 
 and torsion angles; correlations between esds in cell parameters are only 
 used when they are defined by crystal symmetry.  An approximate (isotropic) 
 treatment of cell esds is used for estimating esds involving l.s. planes. 
; 
 
loop_ 
 _geom_bond_atom_site_label_1 
 _geom_bond_atom_site_label_2 
 _geom_bond_distance 
 _geom_bond_site_symmetry_2 
 _geom_bond_publ_flag 
Fe1 O1 1.922(3) . ? 
Fe1 O52 2.008(3) . ? 
Fe1 O11 2.036(3) . ? 
Fe1 O62 2.066(3) . ? 
Fe1 O21 2.107(3) . ? 
Fe1 N101 2.237(4) . ? 
Fe1 Fe2 3.2706(9) . ? 
Fe1 Fe3 3.3587(9) . ? 
Fe2 O1 1.835(3) . ? 
Fe2 O31 2.009(3) . ? 
Fe2 O22 2.009(3) . ? 
Fe2 O41 2.032(3) . ? 
Fe2 O12 2.027(3) . ? 
Fe2 N201 2.242(4) . ? 
Fe2 Fe3 3.2897(9) . ? 
Fe3 O1 1.969(3) . ? 
Fe3 O61 2.047(3) . ? 
Fe3 O42 2.060(3) . ? 
Fe3 O51 2.058(3) . ? 
Fe3 O32 2.101(3) . ? 
Fe3 N301 2.214(4) . ? 
O11 C10 1.252(5) . ? 
O12 C10 1.267(5) . ? 
O22 C20 1.271(5) . ? 
O21 C20 1.250(6) . ? 
O31 C30 1.263(5) . ? 
O32 C30 1.253(5) . ? 
O41 C40 1.260(5) . ? 
O42 C40 1.245(5) . ? 
O51 C50 1.261(5) . ? 
O52 C50 1.246(5) . ? 
O61 C60 1.253(5) . ? 
O62 C60 1.257(5) . ? 
N101 C102 1.341(6) . ? 
N101 C106 1.340(6) . ? 
N201 C202 1.332(6) . ? 
N201 C206 1.347(6) . ? 
N301 C302 1.346(6) . ? 
N301 C306 1.329(6) . ? 
C10 C13 1.510(5) . ? 
C13 C16 1.5334(10) . ? 
C13 C15 1.5336(10) . ? 
C13 C14A 1.5339(10) . ? 
C13 C16A 1.5340(10) . ? 
C13 C15A 1.5339(11) . ? 
C13 C14 1.5337(10) . ? 
C20 C23 1.531(6) . ? 
C23 C25 1.5341(10) . ? 
C23 C24A 1.5338(10) . ? 
C23 C26A 1.5340(10) . ? 
C23 C24 1.5340(10) . ? 
C23 C25A 1.5336(10) . ? 
C23 C26 1.5339(10) . ? 
C30 C33 1.505(6) . ? 
C33 C36 1.5334(10) . ? 
C33 C34 1.5334(10) . ? 
C33 C35A 1.5339(10) . ? 
C33 C34A 1.5341(10) . ? 
C33 C36A 1.5340(10) . ? 
C33 C35 1.5342(10) . ? 
C40 C43 1.520(6) . ? 
C43 C45 1.5339(10) . ? 
C43 C44 1.5338(10) . ? 
C43 C46 1.5338(10) . ? 
C50 C53 1.510(6) . ? 
C53 C56A 1.5340(10) . ? 
C53 C55A 1.5340(12) . ? 
C53 C54 1.5342(10) . ? 
C53 C56 1.5336(10) . ? 
C53 C55 1.5334(10) . ? 
C53 C54A 1.5340(10) . ? 
C60 C63 1.529(6) . ? 
C63 C64 1.516(7) . ? 
C63 C65 1.536(7) . ? 
C63 C66 1.527(7) . ? 
C102 C103 1.380(7) . ? 
C103 C104 1.390(9) . ? 
C104 C105 1.372(8) . ? 
C105 C106 1.389(7) . ? 
C202 C203 1.393(6) . ? 
C203 C204 1.369(7) . ? 
C204 C205 1.383(7) . ? 
C205 C206 1.393(6) . ? 
C302 C303 1.382(7) . ? 
C303 C304 1.376(8) . ? 
C304 C305 1.380(8) . ? 
C305 C306 1.385(8) . ? 
 
loop_ 
 _geom_angle_atom_site_label_1 
 _geom_angle_atom_site_label_2 
 _geom_angle_atom_site_label_3 
 _geom_angle 
 _geom_angle_site_symmetry_1 
 _geom_angle_site_symmetry_3 
 _geom_angle_publ_flag 
O1 Fe1 O52 95.07(12) . . ? 
O1 Fe1 O11 96.45(12) . . ? 
O52 Fe1 O11 168.16(13) . . ? 
O1 Fe1 O62 93.62(12) . . ? 
O52 Fe1 O62 92.87(13) . . ? 
O11 Fe1 O62 89.08(13) . . ? 
O1 Fe1 O21 94.33(12) . . ? 
O52 Fe1 O21 88.95(13) . . ? 
O11 Fe1 O21 87.52(13) . . ? 
O62 Fe1 O21 171.66(13) . . ? 
O1 Fe1 N101 176.60(13) . . ? 
O52 Fe1 N101 81.63(13) . . ? 
O11 Fe1 N101 86.88(13) . . ? 
O62 Fe1 N101 85.73(13) . . ? 
O21 Fe1 N101 86.49(13) . . ? 
O1 Fe1 Fe2 28.75(8) . . ? 
O52 Fe1 Fe2 115.88(9) . . ? 
O11 Fe1 Fe2 74.09(9) . . ? 
O62 Fe1 Fe2 110.65(9) . . ? 
O21 Fe1 Fe2 75.68(9) . . ? 
N101 Fe1 Fe2 154.24(9) . . ? 
O1 Fe1 Fe3 30.73(8) . . ? 
O52 Fe1 Fe3 72.15(9) . . ? 
O11 Fe1 Fe3 119.58(9) . . ? 
O62 Fe1 Fe3 74.92(9) . . ? 
O21 Fe1 Fe3 113.35(9) . . ? 
N101 Fe1 Fe3 146.20(9) . . ? 
Fe2 Fe1 Fe3 59.485(18) . . ? 
O1 Fe2 O31 95.71(13) . . ? 
O1 Fe2 O22 97.82(12) . . ? 
O31 Fe2 O22 166.46(13) . . ? 
O1 Fe2 O41 98.08(12) . . ? 
O31 Fe2 O41 90.21(13) . . ? 
O22 Fe2 O41 88.08(14) . . ? 
O1 Fe2 O12 95.28(12) . . ? 
O31 Fe2 O12 90.13(13) . . ? 
O22 Fe2 O12 88.45(14) . . ? 
O41 Fe2 O12 166.53(12) . . ? 
O1 Fe2 N201 178.59(13) . . ? 
O31 Fe2 N201 83.53(13) . . ? 
O22 Fe2 N201 82.93(13) . . ? 
O41 Fe2 N201 83.13(12) . . ? 
O12 Fe2 N201 83.53(12) . . ? 
O1 Fe2 Fe1 30.25(9) . . ? 
O31 Fe2 Fe1 118.09(10) . . ? 
O22 Fe2 Fe1 74.53(9) . . ? 
O41 Fe2 Fe1 115.73(9) . . ? 
O12 Fe2 Fe1 75.74(9) . . ? 
N201 Fe2 Fe1 149.53(10) . . ? 
O1 Fe2 Fe3 31.34(9) . . ? 
O31 Fe2 Fe3 71.88(9) . . ? 
O22 Fe2 Fe3 120.78(9) . . ? 
O41 Fe2 Fe3 78.22(8) . . ? 
O12 Fe2 Fe3 114.61(9) . . ? 
N201 Fe2 Fe3 148.82(10) . . ? 
Fe1 Fe2 Fe3 61.590(19) . . ? 
O1 Fe3 O61 95.19(12) . . ? 
O1 Fe3 O42 93.83(12) . . ? 
O61 Fe3 O42 170.65(13) . . ? 
O1 Fe3 O51 91.48(12) . . ? 
O61 Fe3 O51 93.06(13) . . ? 
O42 Fe3 O51 89.16(13) . . ? 
O1 Fe3 O32 93.84(12) . . ? 
O61 Fe3 O32 87.21(13) . . ? 
O42 Fe3 O32 89.74(13) . . ? 
O51 Fe3 O32 174.63(13) . . ? 
O1 Fe3 N301 174.12(13) . . ? 
O61 Fe3 N301 88.19(13) . . ? 
O42 Fe3 N301 83.04(13) . . ? 
O51 Fe3 N301 83.52(13) . . ? 
O32 Fe3 N301 91.13(13) . . ? 
O1 Fe3 Fe2 29.00(8) . . ? 
O61 Fe3 Fe2 117.10(9) . . ? 
O42 Fe3 Fe2 70.64(9) . . ? 
O51 Fe3 Fe2 107.72(9) . . ? 
O32 Fe3 Fe2 76.84(9) . . ? 
N301 Fe3 Fe2 150.86(10) . . ? 
O1 Fe3 Fe1 29.93(8) . . ? 
O61 Fe3 Fe1 72.06(9) . . ? 
O42 Fe3 Fe1 117.27(9) . . ? 
O51 Fe3 Fe1 74.40(9) . . ? 
O32 Fe3 Fe1 110.74(9) . . ? 
N301 Fe3 Fe1 149.14(10) . . ? 
Fe2 Fe3 Fe1 58.925(18) . . ? 
Fe2 O1 Fe1 120.99(15) . . ? 
Fe2 O1 Fe3 119.66(14) . . ? 
Fe1 O1 Fe3 119.34(14) . . ? 
C10 O11 Fe1 131.0(3) . . ? 
C10 O12 Fe2 129.7(3) . . ? 
C20 O22 Fe2 133.1(3) . . ? 
C20 O21 Fe1 128.0(3) . . ? 
C30 O31 Fe2 133.8(3) . . ? 
C30 O32 Fe3 125.3(3) . . ? 
C40 O41 Fe2 125.6(3) . . ? 
C40 O42 Fe3 133.3(3) . . ? 
C50 O51 Fe3 128.5(3) . . ? 
C50 O52 Fe1 131.5(3) . . ? 
C60 O61 Fe3 130.7(3) . . ? 
C60 O62 Fe1 128.8(3) . . ? 
C102 N101 C106 117.9(4) . . ? 
C102 N101 Fe1 122.6(3) . . ? 
C106 N101 Fe1 119.2(3) . . ? 
C202 N201 C206 117.9(4) . . ? 
C202 N201 Fe2 121.3(3) . . ? 
C206 N201 Fe2 120.8(3) . . ? 
C302 N301 C306 116.9(4) . . ? 
C302 N301 Fe3 119.5(3) . . ? 
C306 N301 Fe3 122.9(3) . . ? 
O12 C10 O11 126.2(4) . . ? 
O12 C10 C13 117.4(3) . . ? 
O11 C10 C13 116.5(4) . . ? 
C10 C13 C16 112.2(4) . . ? 
C10 C13 C15 106.5(4) . . ? 
C16 C13 C15 111.3(4) . . ? 
C10 C13 C14A 110(2) . . ? 
C16 C13 C14A 50.9(11) . . ? 
C15 C13 C14A 144(2) . . ? 
C10 C13 C16A 106(2) . . ? 
C16 C13 C16A 63.3(4) . . ? 
C15 C13 C16A 52.7(11) . . ? 
C14A C13 C16A 112.7(16) . . ? 
C10 C13 C15A 124(2) . . ? 
C16 C13 C15A 123(2) . . ? 
C15 C13 C15A 63.1(4) . . ? 
C14A C13 C15A 97.9(17) . . ? 
C16A C13 C15A 107(2) . . ? 
C10 C13 C14 109.2(4) . . ? 
C16 C13 C14 110.0(4) . . ? 
C15 C13 C14 107.4(4) . . ? 
C14A C13 C14 63.3(4) . . ? 
C16A C13 C14 144(2) . . ? 
C15A C13 C14 44.4(6) . . ? 
O21 C20 O22 125.8(4) . . ? 
O21 C20 C23 119.8(4) . . ? 
O22 C20 C23 114.5(4) . . ? 
C20 C23 C25 103.3(15) . . ? 
C20 C23 C24A 108.0(4) . . ? 
C25 C23 C24A 67.6(9) . . ? 
C20 C23 C26A 108.6(4) . . ? 
C25 C23 C26A 147.2(14) . . ? 
C24A C23 C26A 108.5(5) . . ? 
C20 C23 C24 111.3(15) . . ? 
C25 C23 C24 114.4(14) . . ? 
C24A C23 C24 49.6(4) . . ? 
C26A C23 C24 60.5(7) . . ? 
C20 C23 C25A 111.3(4) . . ? 
C25 C23 C25A 50.0(4) . . ? 
C24A C23 C25A 111.2(5) . . ? 
C26A C23 C25A 109.1(5) . . ? 
C24 C23 C25A 137.1(15) . . ? 
C20 C23 C26 109.0(15) . . ? 
C25 C23 C26 111.7(11) . . ? 
C24A C23 C26 141.9(14) . . ? 
C26A C23 C26 50.1(4) . . ? 
C24 C23 C26 107.1(12) . . ? 
C25A C23 C26 62.4(8) . . ? 
O32 C30 O31 125.6(4) . . ? 
O32 C30 C33 118.1(4) . . ? 
O31 C30 C33 116.2(4) . . ? 
C30 C33 C36 111.8(4) . . ? 
C30 C33 C34 110.5(4) . . ? 
C36 C33 C34 113.9(5) . . ? 
C30 C33 C35A 121(2) . . ? 
C36 C33 C35A 123(2) . . ? 
C34 C33 C35A 65.3(6) . . ? 
C30 C33 C34A 94(2) . . ? 
C36 C33 C34A 87.5(18) . . ? 
C34 C33 C34A 41.8(4) . . ? 
C35A C33 C34A 106.7(8) . . ? 
C30 C33 C36A 108(2) . . ? 
C36 C33 C36A 41.9(4) . . ? 
C34 C33 C36A 140(2) . . ? 
C35A C33 C36A 100(2) . . ? 
C34A C33 C36A 129(2) . . ? 
C30 C33 C35 105.4(4) . . ? 
C36 C33 C35 107.6(5) . . ? 
C34 C33 C35 107.1(5) . . ? 
C35A C33 C35 41.9(4) . . ? 
C34A C33 C35 148.6(7) . . ? 
C36A C33 C35 68.5(10) . . ? 
O42 C40 O41 126.6(4) . . ? 
O42 C40 C43 118.4(4) . . ? 
O41 C40 C43 115.0(4) . . ? 
C40 C43 C45 109.6(4) . . ? 
C40 C43 C44 108.0(4) . . ? 
C45 C43 C44 110.0(5) . . ? 
C40 C43 C46 109.1(4) . . ? 
C45 C43 C46 109.8(5) . . ? 
C44 C43 C46 110.4(5) . . ? 
O51 C50 O52 126.6(4) . . ? 
O51 C50 C53 116.4(4) . . ? 
O52 C50 C53 117.0(4) . . ? 
C50 C53 C56A 119(4) . . ? 
C50 C53 C55A 91(3) . . ? 
C56A C53 C55A 128(4) . . ? 
C50 C53 C54 105.2(4) . . ? 
C56A C53 C54 52.9(7) . . ? 
C55A C53 C54 160(2) . . ? 
C50 C53 C56 110.7(4) . . ? 
C56A C53 C56 54.3(4) . . ? 
C55A C53 C56 76(3) . . ? 
C54 C53 C56 107.2(5) . . ? 
C50 C53 C55 112.0(4) . . ? 
C56A C53 C55 128(4) . . ? 
C55A C53 C55 54.2(4) . . ? 
C54 C53 C55 108.3(5) . . ? 
C56 C53 C55 113.0(5) . . ? 
C50 C53 C54A 114(4) . . ? 
C56A C53 C54A 96(3) . . ? 
C55A C53 C54A 109.3(11) . . ? 
C54 C53 C54A 54.2(4) . . ? 
C56 C53 C54A 135(4) . . ? 
C55 C53 C54A 55.1(10) . . ? 
O61 C60 O62 126.3(4) . . ? 
O61 C60 C63 117.1(4) . . ? 
O62 C60 C63 116.6(4) . . ? 
C64 C63 C65 109.4(4) . . ? 
C64 C63 C60 107.6(4) . . ? 
C65 C63 C60 107.9(4) . . ? 
C64 C63 C66 110.0(4) . . ? 
C65 C63 C66 110.7(4) . . ? 
C60 C63 C66 111.1(4) . . ? 
N101 C102 C103 122.6(5) . . ? 
C104 C103 C102 119.1(5) . . ? 
C105 C104 C103 118.5(5) . . ? 
C104 C105 C106 119.3(5) . . ? 
N101 C106 C105 122.6(4) . . ? 
N201 C202 C203 123.0(4) . . ? 
C204 C203 C202 118.6(4) . . ? 
C203 C204 C205 119.7(4) . . ? 
C204 C205 C206 118.3(4) . . ? 
N201 C206 C205 122.5(4) . . ? 
N301 C302 C303 123.2(5) . . ? 
C304 C303 C302 118.8(5) . . ? 
C305 C304 C303 118.9(5) . . ? 
C304 C305 C306 118.4(5) . . ? 
N301 C306 C305 123.7(5) . . ? 
 
_diffrn_measured_fraction_theta_max    0.894 
_diffrn_reflns_theta_full              29.86 
_diffrn_measured_fraction_theta_full   0.894 
_refine_diff_density_max    0.835 
_refine_diff_density_min   -0.792 
_refine_diff_density_rms    0.086 
#===END
 
data_fe135cs 
 
_audit_creation_method            SHELXL-97 
_chemical_name_systematic 
; 
 ? 
; 
_chemical_name_common             ? 
_chemical_melting_point           ? 
_chemical_formula_moiety          ? 
_chemical_formula_sum 
 'C45 H69 Fe3 N3 O13' 
_chemical_formula_weight          1027.58 
 
loop_ 
 _atom_type_symbol 
 _atom_type_description 
 _atom_type_scat_dispersion_real 
 _atom_type_scat_dispersion_imag 
 _atom_type_scat_source 
 'C'  'C'   0.0033   0.0016 
 'International Tables Vol C Tables 4.2.6.8 and 6.1.1.4' 
 'H'  'H'   0.0000   0.0000 
 'International Tables Vol C Tables 4.2.6.8 and 6.1.1.4' 
 'N'  'N'   0.0061   0.0033 
 'International Tables Vol C Tables 4.2.6.8 and 6.1.1.4' 
 'O'  'O'   0.0106   0.0060 
 'International Tables Vol C Tables 4.2.6.8 and 6.1.1.4' 
 'Fe'  'Fe'   0.3463   0.8444 
 'International Tables Vol C Tables 4.2.6.8 and 6.1.1.4' 
 
_symmetry_cell_setting            ? 
_symmetry_space_group_name_H-M    ? 
 
loop_ 
 _symmetry_equiv_pos_as_xyz 
 'x, y, z' 
 '-x, y+1/2, -z' 
 
_cell_length_a                    11.6280(10) 
_cell_length_b                    19.843(2) 
_cell_length_c                    11.8430(10) 
_cell_angle_alpha                 90.00 
_cell_angle_beta                  106.886(2) 
_cell_angle_gamma                 90.00 
_cell_volume                      2614.8(4) 
_cell_formula_units_Z             2 
_cell_measurement_temperature     293(2) 
_cell_measurement_reflns_used     ? 
_cell_measurement_theta_min       ? 
_cell_measurement_theta_max       ? 
 
_exptl_crystal_description        ? 
_exptl_crystal_colour             ? 
_exptl_crystal_size_max           ? 
_exptl_crystal_size_mid           ? 
_exptl_crystal_size_min           ? 
_exptl_crystal_density_meas       ? 
_exptl_crystal_density_diffrn     1.305 
_exptl_crystal_density_method     'not measured' 
_exptl_crystal_F_000              1084 
_exptl_absorpt_coefficient_mu     0.881 
_exptl_absorpt_correction_type    ? 
_exptl_absorpt_correction_T_min   ? 
_exptl_absorpt_correction_T_max   ? 
_exptl_absorpt_process_details    ? 
 
_exptl_special_details 
; 
 ? 
; 
 
_diffrn_ambient_temperature       293(2) 
_diffrn_radiation_wavelength      0.71073 
_diffrn_radiation_type            MoK\a 
_diffrn_radiation_source          'fine-focus sealed tube' 
_diffrn_radiation_monochromator   graphite 
_diffrn_measurement_device_type   ? 
_diffrn_measurement_method        ? 
_diffrn_detector_area_resol_mean  ? 
_diffrn_standards_number          ? 
_diffrn_standards_interval_count  ? 
_diffrn_standards_interval_time   ? 
_diffrn_standards_decay_%         ? 
_diffrn_reflns_number             11531 
_diffrn_reflns_av_R_equivalents   0.0000 
_diffrn_reflns_av_sigmaI/netI     0.0349 
_diffrn_reflns_limit_h_min        -15 
_diffrn_reflns_limit_h_max        15 
_diffrn_reflns_limit_k_min        -26 
_diffrn_reflns_limit_k_max        26 
_diffrn_reflns_limit_l_min        0 
_diffrn_reflns_limit_l_max        16 
_diffrn_reflns_theta_min          2.39 
_diffrn_reflns_theta_max          29.59 
_reflns_number_total              11531 
_reflns_number_gt                 11147 
_reflns_threshold_expression      >2sigma(I) 
 
_computing_data_collection        ? 
_computing_cell_refinement        ? 
_computing_data_reduction         ? 
_computing_structure_solution     'SHELXS-97 (Sheldrick, 1990)' 
_computing_structure_refinement   'SHELXL-97 (Sheldrick, 1997)' 
_computing_molecular_graphics     ? 
_computing_publication_material   ? 
 
_refine_special_details 
; 
 Refinement of F^2^ against ALL reflections.  The weighted R-factor wR and 
 goodness of fit S are based on F^2^, conventional R-factors R are based 
 on F, with F set to zero for negative F^2^. The threshold expression of 
 F^2^ > 2sigma(F^2^) is used only for calculating R-factors(gt) etc. and is 
 not relevant to the choice of reflections for refinement.  R-factors based 
 on F^2^ are statistically about twice as large as those based on F, and R- 
 factors based on ALL data will be even larger. 
; 
 
_refine_ls_structure_factor_coef  Fsqd  
_refine_ls_matrix_type            full 
_refine_ls_weighting_scheme       calc  
_refine_ls_weighting_details 
 'calc w=1/[\s^2^(Fo^2^)+(0.0331P)^2^+2.3436P] where P=(Fo^2^+2Fc^2^)/3' 
_atom_sites_solution_primary      direct 
_atom_sites_solution_secondary    difmap 
_atom_sites_solution_hydrogens    geom 
_refine_ls_hydrogen_treatment     mixed 
_refine_ls_extinction_method      none 
_refine_ls_extinction_coef        ? 
_refine_ls_abs_structure_details 
 'Flack H D (1983), Acta Cryst. A39, 876-881' 
_refine_ls_abs_structure_Flack    0.015(14) 
_refine_ls_number_reflns          11531 
_refine_ls_number_parameters      517 
_refine_ls_number_restraints      40 
_refine_ls_R_factor_all           0.0495 
_refine_ls_R_factor_gt            0.0475 
_refine_ls_wR_factor_ref          0.1179 
_refine_ls_wR_factor_gt           0.1159 
_refine_ls_goodness_of_fit_ref    1.327 
_refine_ls_restrained_S_all       1.326 
_refine_ls_shift/su_max           0.390 
_refine_ls_shift/su_mean          0.009 
 
loop_ 
 _atom_site_label 
 _atom_site_type_symbol 
 _atom_site_fract_x 
 _atom_site_fract_y 
 _atom_site_fract_z 
 _atom_site_U_iso_or_equiv 
 _atom_site_adp_type 
 _atom_site_occupancy 
 _atom_site_symmetry_multiplicity 
 _atom_site_calc_flag 
 _atom_site_refinement_flags 
 _atom_site_disorder_assembly 
 _atom_site_disorder_group 
Fe1 Fe 0.87698(4) 0.17714(5) 0.26203(4) 0.02582(10) Uani 1 1 d . . . 
Fe2 Fe 0.74154(4) 0.03675(5) 0.28836(4) 0.02434(10) Uani 1 1 d . . . 
Fe3 Fe 0.57601(4) 0.16897(5) 0.17585(4) 0.02687(11) Uani 1 1 d . . . 
O1 O 0.73535(19) 0.12572(12) 0.2443(2) 0.0221(4) Uani 1 1 d . . . 
O11 O 0.9716(2) 0.13822(15) 0.4207(2) 0.0336(6) Uani 1 1 d . . . 
O12 O 0.8603(2) 0.05166(14) 0.4508(2) 0.0326(6) Uani 1 1 d . . . 
O22 O 0.8817(2) 0.00971(14) 0.2305(3) 0.0334(6) Uani 1 1 d . . . 
O21 O 0.9594(2) 0.10447(14) 0.1828(3) 0.0349(6) Uani 1 1 d . . . 
O31 O 0.6044(2) 0.04127(14) 0.3588(2) 0.0323(5) Uani 1 1 d . . . 
O32 O 0.5131(2) 0.14111(14) 0.3193(2) 0.0342(6) Uani 1 1 d . . . 
O41 O 0.6315(2) -0.00129(13) 0.1360(2) 0.0323(6) Uani 1 1 d . . . 
O42 O 0.5004(2) 0.08356(14) 0.0856(2) 0.0366(6) Uani 1 1 d . . . 
O51 O 0.6250(2) 0.19991(16) 0.0295(2) 0.0343(6) Uani 1 1 d . . . 
O52 O 0.8195(2) 0.22367(14) 0.1057(2) 0.0320(5) Uani 1 1 d . . . 
O61 O 0.6254(2) 0.25919(14) 0.2611(2) 0.0328(6) Uani 1 1 d . . . 
O62 O 0.8234(2) 0.25482(14) 0.3497(2) 0.0310(5) Uani 1 1 d . . . 
N101 N 1.0397(3) 0.24085(16) 0.2749(3) 0.0281(6) Uani 1 1 d . . . 
N201 N 0.7519(3) -0.07072(16) 0.3482(3) 0.0284(6) Uani 1 1 d . . . 
N301 N 0.4020(3) 0.21536(16) 0.0823(3) 0.0314(6) Uani 1 1 d . . . 
C10 C 0.9441(3) 0.09366(18) 0.4838(3) 0.0256(6) Uani 1 1 d . A . 
C13 C 1.0218(3) 0.09054(15) 0.6108(3) 0.0318(7) Uani 1 1 d D . . 
C14 C 1.1542(3) 0.0900(3) 0.6128(6) 0.0574(9) Uiso 0.845(5) 1 d PD A 1 
H14A H 1.1694 0.0513 0.5705 0.086 Uiso 0.845(5) 1 calc PR A 1 
H14B H 1.2043 0.0880 0.6930 0.086 Uiso 0.845(5) 1 calc PR A 1 
H14C H 1.1720 0.1302 0.5761 0.086 Uiso 0.845(5) 1 calc PR A 1 
C15 C 0.9980(6) 0.1557(2) 0.6698(5) 0.0574(9) Uiso 0.845(5) 1 d PD A 1 
H15A H 1.0434 0.1553 0.7517 0.086 Uiso 0.845(5) 1 calc PR A 1 
H15B H 0.9139 0.1590 0.6630 0.086 Uiso 0.845(5) 1 calc PR A 1 
H15C H 1.0218 0.1937 0.6317 0.086 Uiso 0.845(5) 1 calc PR A 1 
C16 C 0.9944(5) 0.0280(2) 0.6747(5) 0.0574(9) Uiso 0.845(5) 1 d PD A 1 
H16A H 1.0037 -0.0117 0.6320 0.086 Uiso 0.845(5) 1 calc PR A 1 
H16B H 0.9134 0.0305 0.6791 0.086 Uiso 0.845(5) 1 calc PR A 1 
H16C H 1.0491 0.0262 0.7529 0.086 Uiso 0.845(5) 1 calc PR A 1 
C14A C 1.0876(13) 0.0229(5) 0.640(3) 0.0574(9) Uiso 0.155(5) 1 d PD A 2 
H14D H 1.0307 -0.0133 0.6170 0.086 Uiso 0.155(5) 1 calc PR A 2 
H14E H 1.1270 0.0203 0.7229 0.086 Uiso 0.155(5) 1 calc PR A 2 
H14F H 1.1462 0.0192 0.5973 0.086 Uiso 0.155(5) 1 calc PR A 2 
C15A C 1.1281(11) 0.1392(9) 0.654(3) 0.0574(9) Uiso 0.155(5) 1 d PD A 2 
H15D H 1.1015 0.1844 0.6320 0.086 Uiso 0.155(5) 1 calc PR A 2 
H15E H 1.1896 0.1274 0.6179 0.086 Uiso 0.155(5) 1 calc PR A 2 
H15F H 1.1598 0.1361 0.7379 0.086 Uiso 0.155(5) 1 calc PR A 2 
C16A C 0.934(2) 0.1004(8) 0.684(2) 0.0574(9) Uiso 0.155(5) 1 d PD A 2 
H16D H 0.8988 0.1445 0.6697 0.086 Uiso 0.155(5) 1 calc PR A 2 
H16E H 0.9765 0.0959 0.7666 0.086 Uiso 0.155(5) 1 calc PR A 2 
H16F H 0.8718 0.0669 0.6626 0.086 Uiso 0.155(5) 1 calc PR A 2 
C20 C 0.9482(3) 0.04175(19) 0.1827(3) 0.0282(6) Uani 1 1 d . B . 
C23 C 1.0208(3) -0.00174(19) 0.1221(4) 0.0431(9) Uani 1 1 d D . . 
C24 C 0.9850(18) -0.0764(3) 0.1144(14) 0.0687(12) Uiso 0.266(6) 1 d PD B 1 
H24A H 0.9803 -0.0915 0.1899 0.103 Uiso 0.266(6) 1 calc PR B 1 
H24B H 1.0442 -0.1025 0.0916 0.103 Uiso 0.266(6) 1 calc PR B 1 
H24C H 0.9082 -0.0819 0.0567 0.103 Uiso 0.266(6) 1 calc PR B 1 
C25 C 1.0044(13) 0.0289(11) -0.0005(8) 0.0687(12) Uiso 0.266(6) 1 d PD B 1 
H25A H 1.0337 0.0744 0.0078 0.103 Uiso 0.266(6) 1 calc PR B 1 
H25B H 0.9207 0.0287 -0.0439 0.103 Uiso 0.266(6) 1 calc PR B 1 
H25C H 1.0486 0.0028 -0.0420 0.103 Uiso 0.266(6) 1 calc PR B 1 
C26 C 1.1536(7) 0.0015(8) 0.1944(17) 0.0687(12) Uiso 0.266(6) 1 d PD B 1 
H26A H 1.1765 0.0476 0.2126 0.103 Uiso 0.266(6) 1 calc PR B 1 
H26B H 1.2022 -0.0177 0.1495 0.103 Uiso 0.266(6) 1 calc PR B 1 
H26C H 1.1653 -0.0234 0.2663 0.103 Uiso 0.266(6) 1 calc PR B 1 
C24A C 0.9338(6) -0.0417(4) 0.0225(6) 0.0687(12) Uiso 0.734(6) 1 d PD B 2 
H24D H 0.8867 -0.0111 -0.0354 0.103 Uiso 0.734(6) 1 calc PR B 2 
H24E H 0.8816 -0.0683 0.0543 0.103 Uiso 0.734(6) 1 calc PR B 2 
H24F H 0.9787 -0.0709 -0.0138 0.103 Uiso 0.734(6) 1 calc PR B 2 
C25A C 1.1075(6) 0.0408(4) 0.0758(7) 0.0687(12) Uiso 0.734(6) 1 d PD B 2 
H25D H 1.0635 0.0758 0.0256 0.103 Uiso 0.734(6) 1 calc PR B 2 
H25E H 1.1461 0.0127 0.0318 0.103 Uiso 0.734(6) 1 calc PR B 2 
H25F H 1.1671 0.0607 0.1411 0.103 Uiso 0.734(6) 1 calc PR B 2 
C26A C 1.0956(7) -0.0517(4) 0.2130(6) 0.0687(12) Uiso 0.734(6) 1 d PD B 2 
H26D H 1.1412 -0.0276 0.2817 0.103 Uiso 0.734(6) 1 calc PR B 2 
H26E H 1.1495 -0.0756 0.1793 0.103 Uiso 0.734(6) 1 calc PR B 2 
H26F H 1.0431 -0.0831 0.2349 0.103 Uiso 0.734(6) 1 calc PR B 2 
C30 C 0.5416(3) 0.08895(18) 0.3790(3) 0.0268(7) Uani 1 1 d . C . 
C33 C 0.4943(3) 0.07918(17) 0.4846(4) 0.0431(10) Uani 1 1 d D . . 
C34 C 0.5744(6) 0.0310(3) 0.5751(5) 0.0640(10) Uiso 0.814(6) 1 d PD C 1 
H34A H 0.5857 -0.0099 0.5365 0.096 Uiso 0.814(6) 1 calc PR C 1 
H34B H 0.5368 0.0210 0.6354 0.096 Uiso 0.814(6) 1 calc PR C 1 
H34C H 0.6510 0.0518 0.6103 0.096 Uiso 0.814(6) 1 calc PR C 1 
C35 C 0.3748(4) 0.0419(4) 0.4333(6) 0.0640(10) Uiso 0.814(6) 1 d PD C 1 
H35A H 0.3893 0.0003 0.3983 0.096 Uiso 0.814(6) 1 calc PR C 1 
H35B H 0.3214 0.0695 0.3743 0.096 Uiso 0.814(6) 1 calc PR C 1 
H35C H 0.3391 0.0326 0.4952 0.096 Uiso 0.814(6) 1 calc PR C 1 
C36 C 0.4629(7) 0.1464(2) 0.5322(6) 0.0640(10) Uiso 0.814(6) 1 d PD C 1 
H36A H 0.4239 0.1753 0.4674 0.096 Uiso 0.814(6) 1 calc PR C 1 
H36B H 0.5352 0.1676 0.5793 0.096 Uiso 0.814(6) 1 calc PR C 1 
H36C H 0.4101 0.1384 0.5798 0.096 Uiso 0.814(6) 1 calc PR C 1 
C34A C 0.6164(14) 0.0802(8) 0.580(2) 0.0640(10) Uiso 0.186(6) 1 d PD C 2 
H34D H 0.6552 0.1227 0.5775 0.096 Uiso 0.186(6) 1 calc PR C 2 
H34E H 0.6659 0.0444 0.5649 0.096 Uiso 0.186(6) 1 calc PR C 2 
H34F H 0.6046 0.0740 0.6559 0.096 Uiso 0.186(6) 1 calc PR C 2 
C35A C 0.4364(15) 0.0123(7) 0.504(2) 0.0640(10) Uiso 0.186(6) 1 d PD C 2 
H35D H 0.4881 -0.0243 0.4975 0.096 Uiso 0.186(6) 1 calc PR C 2 
H35E H 0.3602 0.0074 0.4450 0.096 Uiso 0.186(6) 1 calc PR C 2 
H35F H 0.4248 0.0121 0.5807 0.096 Uiso 0.186(6) 1 calc PR C 2 
C36A C 0.3842(9) 0.1245(9) 0.471(2) 0.0640(10) Uiso 0.186(6) 1 d PD C 2 
H36D H 0.4070 0.1708 0.4680 0.096 Uiso 0.186(6) 1 calc PR C 2 
H36E H 0.3537 0.1180 0.5377 0.096 Uiso 0.186(6) 1 calc PR C 2 
H36F H 0.3231 0.1130 0.4000 0.096 Uiso 0.186(6) 1 calc PR C 2 
C40 C 0.5413(3) 0.02809(19) 0.0689(3) 0.0308(7) Uani 1 1 d . . . 
C43 C 0.4767(4) -0.01106(19) -0.0417(4) 0.0540(13) Uani 1 1 d D . . 
C44 C 0.4174(6) -0.0728(3) -0.0040(6) 0.0768(10) Uiso 1 1 d D . . 
H44A H 0.4767 -0.0980 0.0539 0.115 Uiso 1 1 calc R . . 
H44B H 0.3829 -0.1007 -0.0715 0.115 Uiso 1 1 calc R . . 
H44C H 0.3554 -0.0582 0.0292 0.115 Uiso 1 1 calc R . . 
C45 C 0.3816(5) 0.0335(3) -0.1254(5) 0.0768(10) Uiso 1 1 d D . . 
H45A H 0.4192 0.0733 -0.1444 0.115 Uiso 1 1 calc R . . 
H45B H 0.3220 0.0462 -0.0877 0.115 Uiso 1 1 calc R . . 
H45C H 0.3440 0.0090 -0.1964 0.115 Uiso 1 1 calc R . . 
C46 C 0.5679(5) -0.0337(4) -0.1051(6) 0.0768(10) Uiso 1 1 d D . . 
H46A H 0.6056 0.0052 -0.1271 0.115 Uiso 1 1 calc R . . 
H46B H 0.5273 -0.0588 -0.1745 0.115 Uiso 1 1 calc R . . 
H46C H 0.6279 -0.0616 -0.0532 0.115 Uiso 1 1 calc R . . 
C50 C 0.7251(3) 0.21724(18) 0.0214(3) 0.0258(6) Uani 1 1 d . D . 
C53 C 0.7366(3) 0.22918(19) -0.1004(3) 0.0386(9) Uani 1 1 d D . . 
C54 C 0.7523(7) 0.1583(2) -0.1455(7) 0.0832(14) Uiso 0.855(7) 1 d PD D 1 
H54A H 0.6856 0.1305 -0.1424 0.125 Uiso 0.855(7) 1 calc PR D 1 
H54B H 0.8256 0.1389 -0.0968 0.125 Uiso 0.855(7) 1 calc PR D 1 
H54C H 0.7554 0.1611 -0.2255 0.125 Uiso 0.855(7) 1 calc PR D 1 
C55 C 0.8525(5) 0.2664(4) -0.0992(8) 0.0832(14) Uiso 0.855(7) 1 d PD D 1 
H55A H 0.9194 0.2458 -0.0423 0.125 Uiso 0.855(7) 1 calc PR D 1 
H55B H 0.8464 0.3127 -0.0786 0.125 Uiso 0.855(7) 1 calc PR D 1 
H55C H 0.8643 0.2638 -0.1760 0.125 Uiso 0.855(7) 1 calc PR D 1 
C56 C 0.6206(5) 0.2589(4) -0.1827(7) 0.0832(14) Uiso 0.855(7) 1 d PD D 1 
H56A H 0.5575 0.2260 -0.1962 0.125 Uiso 0.855(7) 1 calc PR D 1 
H56B H 0.6336 0.2710 -0.2565 0.125 Uiso 0.855(7) 1 calc PR D 1 
H56C H 0.5982 0.2982 -0.1469 0.125 Uiso 0.855(7) 1 calc PR D 1 
C54A C 0.8532(14) 0.2009(11) -0.117(4) 0.0832(14) Uiso 0.145(7) 1 d PD D 2 
H54D H 0.9208 0.2228 -0.0637 0.125 Uiso 0.145(7) 1 calc PR D 2 
H54E H 0.8543 0.2088 -0.1970 0.125 Uiso 0.145(7) 1 calc PR D 2 
H54F H 0.8573 0.1533 -0.1021 0.125 Uiso 0.145(7) 1 calc PR D 2 
C55A C 0.7509(18) 0.3059(2) -0.106(5) 0.0832(14) Uiso 0.145(7) 1 d PD D 2 
H55D H 0.8092 0.3210 -0.0349 0.125 Uiso 0.145(7) 1 calc PR D 2 
H55E H 0.6751 0.3272 -0.1122 0.125 Uiso 0.145(7) 1 calc PR D 2 
H55F H 0.7772 0.3174 -0.1728 0.125 Uiso 0.145(7) 1 calc PR D 2 
C56A C 0.645(2) 0.1909(9) -0.199(3) 0.0832(14) Uiso 0.145(7) 1 d PD D 2 
H56D H 0.5676 0.1920 -0.1841 0.125 Uiso 0.145(7) 1 calc PR D 2 
H56E H 0.6701 0.1449 -0.2001 0.125 Uiso 0.145(7) 1 calc PR D 2 
H56F H 0.6386 0.2117 -0.2733 0.125 Uiso 0.145(7) 1 calc PR D 2 
C60 C 0.7190(3) 0.27585(17) 0.3397(3) 0.0235(6) Uani 1 1 d . . . 
C63 C 0.7061(3) 0.32711(18) 0.4313(3) 0.0281(7) Uani 1 1 d . . . 
C64 C 0.7658(4) 0.2982(2) 0.5524(4) 0.0451(10) Uiso 1 1 d . . . 
H64A H 0.7247 0.2577 0.5630 0.068 Uiso 1 1 calc R . . 
H64B H 0.7622 0.3305 0.6116 0.068 Uiso 1 1 calc R . . 
H64C H 0.8482 0.2879 0.5593 0.068 Uiso 1 1 calc R . . 
C65 C 0.7712(4) 0.3914(2) 0.4151(4) 0.0427(9) Uiso 1 1 d . . . 
H65A H 0.8533 0.3811 0.4205 0.064 Uiso 1 1 calc R . . 
H65B H 0.7688 0.4232 0.4755 0.064 Uiso 1 1 calc R . . 
H65C H 0.7325 0.4104 0.3390 0.064 Uiso 1 1 calc R . . 
C66 C 0.5739(4) 0.3413(3) 0.4196(4) 0.0490(10) Uiso 1 1 d . . . 
H66A H 0.5351 0.3003 0.4314 0.074 Uiso 1 1 calc R . . 
H66B H 0.5352 0.3587 0.3422 0.074 Uiso 1 1 calc R . . 
H66C H 0.5685 0.3739 0.4778 0.074 Uiso 1 1 calc R . . 
C102 C 1.1494(3) 0.2148(2) 0.2943(3) 0.0373(8) Uani 1 1 d . . . 
H10A H 1.1602 0.1690 0.3104 0.045 Uiso 1 1 calc R . . 
C103 C 1.2483(4) 0.2533(3) 0.2914(4) 0.0459(10) Uani 1 1 d . . . 
H10B H 1.3236 0.2335 0.3052 0.055 Uiso 1 1 calc R . . 
C104 C 1.2330(4) 0.3213(3) 0.2678(5) 0.0527(12) Uani 1 1 d . . . 
H10C H 1.2975 0.3482 0.2646 0.063 Uiso 1 1 calc R . . 
C105 C 1.1203(4) 0.3484(2) 0.2491(4) 0.0454(10) Uani 1 1 d . . . 
H10D H 1.1078 0.3943 0.2347 0.054 Uiso 1 1 calc R . . 
C106 C 1.0257(3) 0.3069(2) 0.2518(4) 0.0341(8) Uani 1 1 d . . . 
H10E H 0.9494 0.3256 0.2370 0.041 Uiso 1 1 calc R . . 
C202 C 0.6525(4) -0.1071(2) 0.3373(4) 0.0361(8) Uani 1 1 d . . . 
H20A H 0.5783 -0.0868 0.3037 0.043 Uiso 1 1 calc R . . 
C203 C 0.6546(4) -0.1739(2) 0.3738(4) 0.0427(9) Uani 1 1 d . . . 
H20B H 0.5836 -0.1976 0.3654 0.051 Uiso 1 1 calc R . . 
C204 C 0.7641(4) -0.2039(2) 0.4225(4) 0.0441(10) Uani 1 1 d . . . 
H20C H 0.7680 -0.2486 0.4467 0.053 Uiso 1 1 calc R . . 
C205 C 0.8680(4) -0.1678(2) 0.4356(4) 0.0390(9) Uani 1 1 d . . . 
H20D H 0.9429 -0.1873 0.4694 0.047 Uiso 1 1 calc R . . 
C206 C 0.8578(3) -0.1011(2) 0.3964(3) 0.0332(8) Uani 1 1 d . . . 
H20E H 0.9278 -0.0765 0.4042 0.040 Uiso 1 1 calc R . . 
C302 C 0.3994(4) 0.2753(2) 0.0303(4) 0.0384(9) Uani 1 1 d . . . 
H30A H 0.4703 0.3000 0.0462 0.046 Uiso 1 1 calc R . . 
C303 C 0.2957(4) 0.3025(3) -0.0464(4) 0.0496(11) Uani 1 1 d . . . 
H30B H 0.2978 0.3435 -0.0838 0.060 Uiso 1 1 calc R . . 
C304 C 0.1905(4) 0.2676(3) -0.0652(5) 0.0561(13) Uani 1 1 d . . . 
H30C H 0.1193 0.2853 -0.1141 0.067 Uiso 1 1 calc R . . 
C305 C 0.1905(4) 0.2066(2) -0.0120(6) 0.0587(14) Uani 1 1 d . . . 
H30D H 0.1198 0.1821 -0.0241 0.070 Uiso 1 1 calc R . . 
C306 C 0.2983(4) 0.1822(2) 0.0607(4) 0.0444(9) Uani 1 1 d . . . 
H30E H 0.2982 0.1404 0.0963 0.053 Uiso 1 1 calc R . . 
 
loop_ 
 _atom_site_aniso_label 
 _atom_site_aniso_U_11 
 _atom_site_aniso_U_22 
 _atom_site_aniso_U_33 
 _atom_site_aniso_U_23 
 _atom_site_aniso_U_13 
 _atom_site_aniso_U_12 
Fe1 0.0376(2) 0.0206(2) 0.01946(19) 0.00150(18) 0.00863(17) 0.0033(2) 
Fe2 0.0302(2) 0.0205(2) 0.0214(2) 0.00143(18) 0.00606(16) -0.00123(18) 
Fe3 0.0379(2) 0.0219(2) 0.0215(2) -0.00144(18) 0.00979(18) -0.0049(2) 
O1 0.0226(10) 0.0212(11) 0.0215(10) 0.0014(8) 0.0049(8) -0.0010(8) 
O11 0.0339(13) 0.0346(14) 0.0285(12) 0.0079(11) 0.0031(10) -0.0075(10) 
O12 0.0375(13) 0.0307(13) 0.0240(11) 0.0047(10) 0.0000(10) -0.0067(10) 
O22 0.0379(13) 0.0239(12) 0.0438(15) 0.0050(11) 0.0201(12) 0.0050(10) 
O21 0.0378(14) 0.0255(13) 0.0450(15) -0.0028(11) 0.0177(12) -0.0058(10) 
O31 0.0378(12) 0.0264(12) 0.0368(13) 0.0045(11) 0.0174(10) 0.0000(11) 
O32 0.0383(14) 0.0322(13) 0.0346(13) 0.0100(11) 0.0147(11) 0.0025(11) 
O41 0.0386(13) 0.0230(12) 0.0288(12) -0.0026(10) -0.0007(10) 0.0031(10) 
O42 0.0384(14) 0.0272(13) 0.0374(15) -0.0082(11) 0.0002(11) 0.0058(11) 
O51 0.0269(12) 0.0501(16) 0.0262(12) 0.0070(11) 0.0082(10) -0.0002(11) 
O52 0.0304(12) 0.0368(14) 0.0253(12) 0.0084(11) 0.0023(10) -0.0053(10) 
O61 0.0302(12) 0.0295(13) 0.0329(13) -0.0052(10) 0.0000(10) -0.0021(10) 
O62 0.0271(12) 0.0294(13) 0.0383(14) -0.0085(11) 0.0127(10) -0.0011(10) 
N101 0.0302(14) 0.0287(15) 0.0248(13) -0.0020(11) 0.0070(11) 0.0006(11) 
N201 0.0342(15) 0.0252(14) 0.0249(14) 0.0025(11) 0.0070(11) -0.0017(11) 
N301 0.0328(15) 0.0267(15) 0.0366(16) -0.0044(12) 0.0130(12) -0.0014(12) 
C10 0.0279(15) 0.0246(16) 0.0245(15) 0.0007(12) 0.0079(12) 0.0029(12) 
C13 0.0346(17) 0.0306(17) 0.0231(16) 0.0033(13) -0.0029(13) 0.0023(14) 
C20 0.0316(15) 0.0266(16) 0.0253(15) -0.0029(14) 0.0066(12) 0.0003(14) 
C23 0.046(2) 0.039(2) 0.053(2) 0.0006(19) 0.027(2) -0.0002(17) 
C30 0.0263(15) 0.0277(16) 0.0267(16) 0.0001(13) 0.0079(12) -0.0073(13) 
C33 0.053(2) 0.042(2) 0.045(2) 0.0093(18) 0.032(2) 0.0048(18) 
C40 0.0334(16) 0.0262(17) 0.0278(16) -0.0034(13) 0.0008(13) 0.0029(14) 
C43 0.063(3) 0.037(2) 0.044(2) -0.0182(19) -0.013(2) 0.013(2) 
C50 0.0303(16) 0.0278(16) 0.0182(14) 0.0014(12) 0.0055(12) 0.0049(12) 
C53 0.0329(18) 0.059(3) 0.0251(17) 0.0032(17) 0.0103(14) 0.0012(17) 
C60 0.0298(15) 0.0199(14) 0.0215(14) 0.0005(11) 0.0083(12) -0.0028(12) 
C63 0.0336(17) 0.0241(16) 0.0277(16) -0.0054(13) 0.0107(13) 0.0015(13) 
C102 0.0359(19) 0.042(2) 0.0317(18) -0.0067(16) 0.0055(15) 0.0077(16) 
C103 0.0312(19) 0.065(3) 0.041(2) -0.004(2) 0.0103(17) -0.0007(19) 
C104 0.039(2) 0.066(3) 0.053(3) -0.001(2) 0.0138(19) -0.016(2) 
C105 0.046(2) 0.040(2) 0.048(2) 0.0063(19) 0.0111(19) -0.0106(18) 
C106 0.0339(18) 0.0297(18) 0.039(2) 0.0046(15) 0.0116(15) -0.0013(14) 
C202 0.040(2) 0.0292(18) 0.037(2) 0.0040(15) 0.0072(16) -0.0055(15) 
C203 0.053(2) 0.0292(19) 0.045(2) 0.0053(17) 0.0131(19) -0.0130(17) 
C204 0.070(3) 0.0233(18) 0.041(2) 0.0061(16) 0.019(2) -0.0024(18) 
C205 0.046(2) 0.0309(19) 0.039(2) 0.0054(16) 0.0118(17) 0.0072(16) 
C206 0.0363(18) 0.0306(18) 0.0325(18) 0.0044(15) 0.0096(15) 0.0016(14) 
C302 0.0333(19) 0.0312(19) 0.050(2) 0.0030(17) 0.0117(17) -0.0008(15) 
C303 0.049(2) 0.043(2) 0.054(3) 0.003(2) 0.010(2) 0.0108(19) 
C304 0.046(2) 0.045(3) 0.066(3) -0.002(2) -0.001(2) 0.011(2) 
C305 0.031(2) 0.040(2) 0.094(4) -0.008(2) 0.001(2) -0.0053(17) 
C306 0.042(2) 0.032(2) 0.059(3) 0.0021(19) 0.0143(18) -0.0027(17) 
 
_geom_special_details 
; 
 All esds (except the esd in the dihedral angle between two l.s. planes) 
 are estimated using the full covariance matrix.  The cell esds are taken 
 into account individually in the estimation of esds in distances, angles 
 and torsion angles; correlations between esds in cell parameters are only 
 used when they are defined by crystal symmetry.  An approximate (isotropic) 
 treatment of cell esds is used for estimating esds involving l.s. planes. 
; 
 
loop_ 
 _geom_bond_atom_site_label_1 
 _geom_bond_atom_site_label_2 
 _geom_bond_distance 
 _geom_bond_site_symmetry_2 
 _geom_bond_publ_flag 
Fe1 O1 1.897(2) . ? 
Fe1 O52 2.002(2) . ? 
Fe1 O11 2.034(3) . ? 
Fe1 O62 2.054(3) . ? 
Fe1 O21 2.098(3) . ? 
Fe1 N101 2.244(3) . ? 
Fe1 Fe2 3.2594(7) . ? 
Fe1 Fe3 3.3527(7) . ? 
Fe2 O1 1.836(2) . ? 
Fe2 O31 2.004(2) . ? 
Fe2 O22 2.016(3) . ? 
Fe2 O41 2.030(2) . ? 
Fe2 O12 2.038(2) . ? 
Fe2 N201 2.239(3) . ? 
Fe2 Fe3 3.2976(7) . ? 
Fe3 O1 1.989(2) . ? 
Fe3 O61 2.054(3) . ? 
Fe3 O42 2.059(3) . ? 
Fe3 O51 2.068(3) . ? 
Fe3 O32 2.109(3) . ? 
Fe3 N301 2.206(3) . ? 
O11 C10 1.257(4) . ? 
O12 C10 1.255(4) . ? 
O22 C20 1.255(4) . ? 
O21 C20 1.251(5) . ? 
O31 C30 1.261(4) . ? 
O32 C30 1.243(4) . ? 
O41 C40 1.260(4) . ? 
O42 C40 1.237(4) . ? 
O51 C50 1.244(4) . ? 
O52 C50 1.257(4) . ? 
O61 C60 1.254(4) . ? 
O62 C60 1.256(4) . ? 
N101 C102 1.333(5) . ? 
N101 C106 1.339(5) . ? 
N201 C206 1.340(5) . ? 
N201 C202 1.337(5) . ? 
N301 C306 1.333(5) . ? 
N301 C302 1.334(5) . ? 
C10 C13 1.515(4) . ? 
C13 C16A 1.5339(10) . ? 
C13 C16 1.5332(10) . ? 
C13 C15 1.5333(10) . ? 
C13 C15A 1.5338(10) . ? 
C13 C14A 1.5339(10) . ? 
C13 C14 1.5337(10) . ? 
C20 C23 1.525(5) . ? 
C23 C25 1.5341(10) . ? 
C23 C24A 1.5338(10) . ? 
C23 C26A 1.5342(10) . ? 
C23 C26 1.5339(10) . ? 
C23 C25A 1.5334(10) . ? 
C23 C24 1.5340(10) . ? 
C30 C33 1.517(5) . ? 
C33 C34 1.5334(10) . ? 
C33 C34A 1.5344(10) . ? 
C33 C36 1.5331(10) . ? 
C33 C35A 1.5337(10) . ? 
C33 C35 1.5348(10) . ? 
C33 C36A 1.5341(10) . ? 
C40 C43 1.520(5) . ? 
C43 C45 1.5337(10) . ? 
C43 C46 1.5337(10) . ? 
C43 C44 1.5337(10) . ? 
C50 C53 1.506(5) . ? 
C53 C56A 1.5339(10) . ? 
C53 C56 1.5334(10) . ? 
C53 C54 1.5344(10) . ? 
C53 C55 1.5332(10) . ? 
C53 C55A 1.5341(12) . ? 
C53 C54A 1.5339(10) . ? 
C60 C63 1.526(5) . ? 
C63 C64 1.513(6) . ? 
C63 C66 1.529(6) . ? 
C63 C65 1.523(6) . ? 
C102 C103 1.389(6) . ? 
C103 C104 1.379(8) . ? 
C104 C105 1.373(7) . ? 
C105 C106 1.382(6) . ? 
C202 C203 1.392(5) . ? 
C203 C204 1.372(7) . ? 
C204 C205 1.373(6) . ? 
C205 C206 1.397(5) . ? 
C302 C303 1.392(6) . ? 
C303 C304 1.366(7) . ? 
C304 C305 1.365(7) . ? 
C305 C306 1.386(6) . ? 
 
loop_ 
 _geom_angle_atom_site_label_1 
 _geom_angle_atom_site_label_2 
 _geom_angle_atom_site_label_3 
 _geom_angle 
 _geom_angle_site_symmetry_1 
 _geom_angle_site_symmetry_3 
 _geom_angle_publ_flag 
O1 Fe1 O52 95.74(10) . . ? 
O1 Fe1 O11 96.73(10) . . ? 
O52 Fe1 O11 167.21(11) . . ? 
O1 Fe1 O62 94.49(10) . . ? 
O52 Fe1 O62 93.03(11) . . ? 
O11 Fe1 O62 88.84(11) . . ? 
O1 Fe1 O21 94.33(10) . . ? 
O52 Fe1 O21 88.65(11) . . ? 
O11 Fe1 O21 87.57(12) . . ? 
O62 Fe1 O21 170.81(10) . . ? 
O1 Fe1 N101 177.15(11) . . ? 
O52 Fe1 N101 81.44(11) . . ? 
O11 Fe1 N101 86.11(11) . . ? 
O62 Fe1 N101 85.22(10) . . ? 
O21 Fe1 N101 86.10(10) . . ? 
O1 Fe1 Fe2 28.66(7) . . ? 
O52 Fe1 Fe2 116.22(7) . . ? 
O11 Fe1 Fe2 74.57(7) . . ? 
O62 Fe1 Fe2 111.53(8) . . ? 
O21 Fe1 Fe2 75.60(7) . . ? 
N101 Fe1 Fe2 153.71(8) . . ? 
O1 Fe1 Fe3 31.15(7) . . ? 
O52 Fe1 Fe3 72.68(7) . . ? 
O11 Fe1 Fe3 119.97(8) . . ? 
O62 Fe1 Fe3 75.35(7) . . ? 
O21 Fe1 Fe3 113.74(7) . . ? 
N101 Fe1 Fe3 146.41(8) . . ? 
Fe2 Fe1 Fe3 59.810(15) . . ? 
O1 Fe2 O31 96.01(11) . . ? 
O1 Fe2 O22 97.37(10) . . ? 
O31 Fe2 O22 166.61(11) . . ? 
O1 Fe2 O41 98.19(10) . . ? 
O31 Fe2 O41 90.82(11) . . ? 
O22 Fe2 O41 87.83(12) . . ? 
O1 Fe2 O12 95.07(10) . . ? 
O31 Fe2 O12 90.18(11) . . ? 
O22 Fe2 O12 88.09(12) . . ? 
O41 Fe2 O12 166.52(10) . . ? 
O1 Fe2 N201 178.10(11) . . ? 
O31 Fe2 N201 83.52(11) . . ? 
O22 Fe2 N201 83.09(11) . . ? 
O41 Fe2 N201 83.66(10) . . ? 
O12 Fe2 N201 83.10(10) . . ? 
O1 Fe2 Fe1 29.69(7) . . ? 
O31 Fe2 Fe1 117.80(8) . . ? 
O22 Fe2 Fe1 74.57(7) . . ? 
O41 Fe2 Fe1 115.47(8) . . ? 
O12 Fe2 Fe1 75.67(7) . . ? 
N201 Fe2 Fe1 149.44(8) . . ? 
O1 Fe2 Fe3 31.81(7) . . ? 
O31 Fe2 Fe3 72.00(8) . . ? 
O22 Fe2 Fe3 120.60(8) . . ? 
O41 Fe2 Fe3 78.07(7) . . ? 
O12 Fe2 Fe3 114.95(8) . . ? 
N201 Fe2 Fe3 148.98(8) . . ? 
Fe1 Fe2 Fe3 61.501(16) . . ? 
O1 Fe3 O61 94.66(10) . . ? 
O1 Fe3 O42 93.62(10) . . ? 
O61 Fe3 O42 171.42(11) . . ? 
O1 Fe3 O51 91.10(10) . . ? 
O61 Fe3 O51 92.70(11) . . ? 
O42 Fe3 O51 89.39(12) . . ? 
O1 Fe3 O32 93.34(10) . . ? 
O61 Fe3 O32 86.88(11) . . ? 
O42 Fe3 O32 90.39(12) . . ? 
O51 Fe3 O32 175.56(10) . . ? 
O1 Fe3 N301 174.23(11) . . ? 
O61 Fe3 N301 88.16(11) . . ? 
O42 Fe3 N301 83.79(11) . . ? 
O51 Fe3 N301 83.73(11) . . ? 
O32 Fe3 N301 91.84(11) . . ? 
O1 Fe3 Fe2 29.13(7) . . ? 
O61 Fe3 Fe2 116.61(7) . . ? 
O42 Fe3 Fe2 70.49(7) . . ? 
O51 Fe3 Fe2 107.71(8) . . ? 
O32 Fe3 Fe2 76.36(7) . . ? 
N301 Fe3 Fe2 151.35(8) . . ? 
O1 Fe3 Fe1 29.56(7) . . ? 
O61 Fe3 Fe1 71.93(7) . . ? 
O42 Fe3 Fe1 116.63(8) . . ? 
O51 Fe3 Fe1 73.95(7) . . ? 
O32 Fe3 Fe1 110.06(8) . . ? 
N301 Fe3 Fe1 148.94(8) . . ? 
Fe2 Fe3 Fe1 58.689(15) . . ? 
Fe2 O1 Fe1 121.65(12) . . ? 
Fe2 O1 Fe3 119.07(11) . . ? 
Fe1 O1 Fe3 119.28(12) . . ? 
C10 O11 Fe1 130.8(2) . . ? 
C10 O12 Fe2 129.9(2) . . ? 
C20 O22 Fe2 133.1(2) . . ? 
C20 O21 Fe1 128.6(2) . . ? 
C30 O31 Fe2 133.5(2) . . ? 
C30 O32 Fe3 125.4(2) . . ? 
C40 O41 Fe2 125.7(2) . . ? 
C40 O42 Fe3 133.6(2) . . ? 
C50 O51 Fe3 129.7(2) . . ? 
C50 O52 Fe1 131.8(2) . . ? 
C60 O61 Fe3 130.8(2) . . ? 
C60 O62 Fe1 128.9(2) . . ? 
C102 N101 C106 117.9(3) . . ? 
C102 N101 Fe1 122.6(3) . . ? 
C106 N101 Fe1 119.2(2) . . ? 
C206 N201 C202 117.4(3) . . ? 
C206 N201 Fe2 121.4(2) . . ? 
C202 N201 Fe2 121.2(2) . . ? 
C306 N301 C302 117.0(3) . . ? 
C306 N301 Fe3 122.5(3) . . ? 
C302 N301 Fe3 119.9(3) . . ? 
O12 C10 O11 126.2(3) . . ? 
O12 C10 C13 117.8(3) . . ? 
O11 C10 C13 115.9(3) . . ? 
C10 C13 C16A 104.8(13) . . ? 
C10 C13 C16 111.9(3) . . ? 
C16A C13 C16 63.6(4) . . ? 
C10 C13 C15 106.5(3) . . ? 
C16A C13 C15 52.9(8) . . ? 
C16 C13 C15 111.5(4) . . ? 
C10 C13 C15A 119.6(14) . . ? 
C16A C13 C15A 109.7(13) . . ? 
C16 C13 C15A 127.5(14) . . ? 
C15 C13 C15A 63.5(4) . . ? 
C10 C13 C14A 111.9(14) . . ? 
C16A C13 C14A 110.8(11) . . ? 
C16 C13 C14A 49.0(7) . . ? 
C15 C13 C14A 141.4(14) . . ? 
C15A C13 C14A 100.1(12) . . ? 
C10 C13 C14 108.8(3) . . ? 
C16A C13 C14 145.4(13) . . ? 
C16 C13 C14 109.7(4) . . ? 
C15 C13 C14 108.2(4) . . ? 
C15A C13 C14 44.8(6) . . ? 
C14A C13 C14 63.7(4) . . ? 
O21 C20 O22 125.5(3) . . ? 
O21 C20 C23 119.5(3) . . ? 
O22 C20 C23 115.0(3) . . ? 
C20 C23 C25 106.7(9) . . ? 
C20 C23 C24A 108.8(4) . . ? 
C25 C23 C24A 66.7(7) . . ? 
C20 C23 C26A 108.3(4) . . ? 
C25 C23 C26A 144.0(9) . . ? 
C24A C23 C26A 108.6(5) . . ? 
C20 C23 C26 108.6(10) . . ? 
C25 C23 C26 109.9(8) . . ? 
C24A C23 C26 141.5(10) . . ? 
C26A C23 C26 50.3(4) . . ? 
C20 C23 C25A 111.6(4) . . ? 
C25 C23 C25A 50.0(4) . . ? 
C24A C23 C25A 111.4(5) . . ? 
C26A C23 C25A 108.0(5) . . ? 
C26 C23 C25A 61.1(7) . . ? 
C20 C23 C24 113.4(10) . . ? 
C25 C23 C24 111.7(10) . . ? 
C24A C23 C24 49.3(4) . . ? 
C26A C23 C24 60.5(6) . . ? 
C26 C23 C24 106.6(9) . . ? 
C25A C23 C24 134.9(10) . . ? 
O32 C30 O31 126.1(3) . . ? 
O32 C30 C33 118.4(3) . . ? 
O31 C30 C33 115.5(3) . . ? 
C30 C33 C34 111.3(4) . . ? 
C30 C33 C34A 97.1(12) . . ? 
C34 C33 C34A 41.4(4) . . ? 
C30 C33 C36 112.0(4) . . ? 
C34 C33 C36 116.5(5) . . ? 
C34A C33 C36 89.3(10) . . ? 
C30 C33 C35A 120.8(12) . . ? 
C34 C33 C35A 64.0(6) . . ? 
C34A C33 C35A 104.8(7) . . ? 
C36 C33 C35A 122.5(12) . . ? 
C30 C33 C35 103.8(4) . . ? 
C34 C33 C35 105.8(4) . . ? 
C34A C33 C35 146.6(7) . . ? 
C36 C33 C35 106.3(5) . . ? 
C35A C33 C35 42.0(4) . . ? 
C30 C33 C36A 109.4(12) . . ? 
C34 C33 C36A 139.1(13) . . ? 
C34A C33 C36A 129.4(12) . . ? 
C36 C33 C36A 41.2(4) . . ? 
C35A C33 C36A 97.7(13) . . ? 
C35 C33 C36A 67.0(7) . . ? 
O42 C40 O41 126.8(3) . . ? 
O42 C40 C43 118.4(3) . . ? 
O41 C40 C43 114.8(3) . . ? 
C40 C43 C45 110.2(4) . . ? 
C40 C43 C46 109.4(4) . . ? 
C45 C43 C46 108.9(5) . . ? 
C40 C43 C44 108.0(4) . . ? 
C45 C43 C44 110.3(5) . . ? 
C46 C43 C44 110.0(4) . . ? 
O52 C50 O51 126.0(3) . . ? 
O52 C50 C53 116.4(3) . . ? 
O51 C50 C53 117.6(3) . . ? 
C50 C53 C56A 114.4(19) . . ? 
C50 C53 C56 111.3(4) . . ? 
C56A C53 C56 54.4(4) . . ? 
C50 C53 C54 104.0(4) . . ? 
C56A C53 C54 53.7(7) . . ? 
C56 C53 C54 107.6(5) . . ? 
C50 C53 C55 112.9(4) . . ? 
C56A C53 C55 131.5(19) . . ? 
C56 C53 C55 115.4(5) . . ? 
C54 C53 C55 104.6(5) . . ? 
C50 C53 C55A 103.6(19) . . ? 
C56A C53 C55A 121(2) . . ? 
C56 C53 C55A 71.3(13) . . ? 
C54 C53 C55A 150.5(17) . . ? 
C55 C53 C55A 54.4(4) . . ? 
C50 C53 C54A 113(2) . . ? 
C56A C53 C54A 99.6(17) . . ? 
C56 C53 C54A 135(2) . . ? 
C54 C53 C54A 54.5(4) . . ? 
C55 C53 C54A 50.9(7) . . ? 
C55A C53 C54A 104.4(11) . . ? 
O61 C60 O62 126.1(3) . . ? 
O61 C60 C63 117.4(3) . . ? 
O62 C60 C63 116.5(3) . . ? 
C64 C63 C66 109.2(3) . . ? 
C64 C63 C65 109.3(3) . . ? 
C66 C63 C65 110.9(3) . . ? 
C64 C63 C60 107.9(3) . . ? 
C66 C63 C60 111.2(3) . . ? 
C65 C63 C60 108.3(3) . . ? 
N101 C102 C103 122.7(4) . . ? 
C104 C103 C102 119.0(4) . . ? 
C105 C104 C103 118.4(4) . . ? 
C104 C105 C106 119.5(4) . . ? 
N101 C106 C105 122.5(4) . . ? 
N201 C202 C203 123.2(4) . . ? 
C204 C203 C202 118.3(4) . . ? 
C203 C204 C205 120.0(4) . . ? 
C204 C205 C206 118.0(4) . . ? 
N201 C206 C205 123.1(4) . . ? 
N301 C302 C303 123.1(4) . . ? 
C304 C303 C302 118.4(5) . . ? 
C303 C304 C305 119.6(4) . . ? 
C304 C305 C306 118.4(4) . . ? 
N301 C306 C305 123.5(4) . . ? 
 
_diffrn_measured_fraction_theta_max    0.897 
_diffrn_reflns_theta_full              29.59 
_diffrn_measured_fraction_theta_full   0.897 
_refine_diff_density_max    1.055 
_refine_diff_density_min   -0.775 
_refine_diff_density_rms    0.075 
#===END
 
data_fe160m 
 
_audit_creation_method            SHELXL-97 
_chemical_name_systematic 
; 
 ? 
; 
_chemical_name_common             ? 
_chemical_melting_point           ? 
_chemical_formula_moiety          ? 
_chemical_formula_sum 
 'C45 H69 Fe3 N3 O13' 
_chemical_formula_weight          1027.58 
 
loop_ 
 _atom_type_symbol 
 _atom_type_description 
 _atom_type_scat_dispersion_real 
 _atom_type_scat_dispersion_imag 
 _atom_type_scat_source 
 'C'  'C'   0.0033   0.0016 
 'International Tables Vol C Tables 4.2.6.8 and 6.1.1.4' 
 'H'  'H'   0.0000   0.0000 
 'International Tables Vol C Tables 4.2.6.8 and 6.1.1.4' 
 'N'  'N'   0.0061   0.0033 
 'International Tables Vol C Tables 4.2.6.8 and 6.1.1.4' 
 'O'  'O'   0.0106   0.0060 
 'International Tables Vol C Tables 4.2.6.8 and 6.1.1.4' 
 'Fe'  'Fe'   0.3463   0.8444 
 'International Tables Vol C Tables 4.2.6.8 and 6.1.1.4' 
 
_symmetry_cell_setting            ? 
_symmetry_space_group_name_H-M    ? 
 
loop_ 
 _symmetry_equiv_pos_as_xyz 
 'x, y, z' 
 '-x, y+1/2, -z' 
 
_cell_length_a                    11.6670(10) 
_cell_length_b                    19.918(2) 
_cell_length_c                    11.9810(10) 
_cell_angle_alpha                 90.00 
_cell_angle_beta                  106.786(2) 
_cell_angle_gamma                 90.00 
_cell_volume                      2665.6(4) 
_cell_formula_units_Z             2 
_cell_measurement_temperature     293(2) 
_cell_measurement_reflns_used     ? 
_cell_measurement_theta_min       ? 
_cell_measurement_theta_max       ? 
 
_exptl_crystal_description        ? 
_exptl_crystal_colour             ? 
_exptl_crystal_size_max           ? 
_exptl_crystal_size_mid           ? 
_exptl_crystal_size_min           ? 
_exptl_crystal_density_meas       ? 
_exptl_crystal_density_diffrn     1.280 
_exptl_crystal_density_method     'not measured' 
_exptl_crystal_F_000              1084 
_exptl_absorpt_coefficient_mu     0.864 
_exptl_absorpt_correction_type    ? 
_exptl_absorpt_correction_T_min   ? 
_exptl_absorpt_correction_T_max   ? 
_exptl_absorpt_process_details    ? 
 
_exptl_special_details 
; 
 ? 
; 
 
_diffrn_ambient_temperature       293(2) 
_diffrn_radiation_wavelength      0.71073 
_diffrn_radiation_type            MoK\a 
_diffrn_radiation_source          'fine-focus sealed tube' 
_diffrn_radiation_monochromator   graphite 
_diffrn_measurement_device_type   ? 
_diffrn_measurement_method        ? 
_diffrn_detector_area_resol_mean  ? 
_diffrn_standards_number          ? 
_diffrn_standards_interval_count  ? 
_diffrn_standards_interval_time   ? 
_diffrn_standards_decay_%         ? 
_diffrn_reflns_number             34002 
_diffrn_reflns_av_R_equivalents   0.0448 
_diffrn_reflns_av_sigmaI/netI     0.0612 
_diffrn_reflns_limit_h_min        -16 
_diffrn_reflns_limit_h_max        15 
_diffrn_reflns_limit_k_min        -27 
_diffrn_reflns_limit_k_max        27 
_diffrn_reflns_limit_l_min        -16 
_diffrn_reflns_limit_l_max        16 
_diffrn_reflns_theta_min          2.15 
_diffrn_reflns_theta_max          29.99 
_reflns_number_total              14491 
_reflns_number_gt                 10742 
_reflns_threshold_expression      >2sigma(I) 
 
_computing_data_collection        ? 
_computing_cell_refinement        ? 
_computing_data_reduction         ? 
_computing_structure_solution     'SHELXS-97 (Sheldrick, 1990)' 
_computing_structure_refinement   'SHELXL-97 (Sheldrick, 1997)' 
_computing_molecular_graphics     ? 
_computing_publication_material   ? 
 
_refine_special_details 
; 
 Refinement of F^2^ against ALL reflections.  The weighted R-factor wR and 
 goodness of fit S are based on F^2^, conventional R-factors R are based 
 on F, with F set to zero for negative F^2^. The threshold expression of 
 F^2^ > 2sigma(F^2^) is used only for calculating R-factors(gt) etc. and is 
 not relevant to the choice of reflections for refinement.  R-factors based 
 on F^2^ are statistically about twice as large as those based on F, and R- 
 factors based on ALL data will be even larger. 
; 
 
_refine_ls_structure_factor_coef  Fsqd  
_refine_ls_matrix_type            full 
_refine_ls_weighting_scheme       calc  
_refine_ls_weighting_details 
 'calc w=1/[\s^2^(Fo^2^)+(0.0331P)^2^+2.3436P] where P=(Fo^2^+2Fc^2^)/3' 
_atom_sites_solution_primary      direct 
_atom_sites_solution_secondary    difmap 
_atom_sites_solution_hydrogens    geom 
_refine_ls_hydrogen_treatment     mixed 
_refine_ls_extinction_method      none 
_refine_ls_extinction_coef        ? 
_refine_ls_abs_structure_details 
 'Flack H D (1983), Acta Cryst. A39, 876-881' 
_refine_ls_abs_structure_Flack    -0.014(15) 
_refine_ls_number_reflns          14491 
_refine_ls_number_parameters      527 
_refine_ls_number_restraints      46 
_refine_ls_R_factor_all           0.0893 
_refine_ls_R_factor_gt            0.0577 
_refine_ls_wR_factor_ref          0.1230 
_refine_ls_wR_factor_gt           0.1127 
_refine_ls_goodness_of_fit_ref    1.154 
_refine_ls_restrained_S_all       1.155 
_refine_ls_shift/su_max           1.642 
_refine_ls_shift/su_mean          0.048 
 
loop_ 
 _atom_site_label 
 _atom_site_type_symbol 
 _atom_site_fract_x 
 _atom_site_fract_y 
 _atom_site_fract_z 
 _atom_site_U_iso_or_equiv 
 _atom_site_adp_type 
 _atom_site_occupancy 
 _atom_site_symmetry_multiplicity 
 _atom_site_calc_flag 
 _atom_site_refinement_flags 
 _atom_site_disorder_assembly 
 _atom_site_disorder_group 
Fe1 Fe 0.87558(5) 0.17646(7) 0.26127(4) 0.03094(12) Uani 1 1 d . . . 
Fe2 Fe 0.74063(5) 0.03635(7) 0.28677(5) 0.02984(12) Uani 1 1 d . . . 
Fe3 Fe 0.57514(5) 0.16843(7) 0.17529(5) 0.03226(13) Uani 1 1 d . . . 
O1 O 0.7347(2) 0.12516(14) 0.2437(2) 0.0281(6) Uani 1 1 d . . . 
O11 O 0.9692(3) 0.13778(16) 0.4203(3) 0.0408(7) Uani 1 1 d . . . 
O12 O 0.8597(3) 0.05097(15) 0.4489(2) 0.0399(7) Uani 1 1 d . . . 
O22 O 0.8801(3) 0.00951(15) 0.2279(3) 0.0408(7) Uani 1 1 d . . . 
O21 O 0.9588(3) 0.10422(15) 0.1826(3) 0.0419(7) Uani 1 1 d . . . 
O31 O 0.6043(2) 0.04097(16) 0.3578(2) 0.0387(6) Uani 1 1 d . . . 
O32 O 0.5121(3) 0.13999(15) 0.3182(3) 0.0412(7) Uani 1 1 d . . . 
O41 O 0.6311(3) -0.00106(15) 0.1353(2) 0.0380(7) Uani 1 1 d . . . 
O42 O 0.5005(3) 0.08327(16) 0.0835(3) 0.0437(7) Uani 1 1 d . . . 
O51 O 0.6247(3) 0.20026(17) 0.0296(2) 0.0421(7) Uani 1 1 d . . . 
O52 O 0.8192(3) 0.22299(16) 0.1049(2) 0.0384(7) Uani 1 1 d . . . 
O61 O 0.6247(3) 0.25824(16) 0.2613(3) 0.0404(7) Uani 1 1 d . . . 
O62 O 0.8219(3) 0.25378(15) 0.3483(3) 0.0379(7) Uani 1 1 d . . . 
N101 N 1.0386(3) 0.23972(18) 0.2744(3) 0.0320(7) Uani 1 1 d . . . 
N201 N 0.7512(3) -0.07137(18) 0.3459(3) 0.0350(8) Uani 1 1 d . . . 
N301 N 0.4015(3) 0.21484(18) 0.0823(3) 0.0374(8) Uani 1 1 d . . . 
C10 C 0.9431(4) 0.0927(2) 0.4825(3) 0.0315(8) Uani 1 1 d . A . 
C13 C 1.0205(3) 0.08907(17) 0.6092(3) 0.0373(9) Uani 1 1 d D . . 
C14 C 1.1521(4) 0.0886(4) 0.6097(7) 0.0702(12) Uiso 0.822(5) 1 d PD A 1 
H14A H 1.1667 0.0501 0.5675 0.105 Uiso 0.822(5) 1 calc PR A 1 
H14B H 1.2027 0.0866 0.6886 0.105 Uiso 0.822(5) 1 calc PR A 1 
H14C H 1.1693 0.1287 0.5731 0.105 Uiso 0.822(5) 1 calc PR A 1 
C15 C 0.9967(7) 0.1535(3) 0.6691(6) 0.0702(12) Uiso 0.822(5) 1 d PD A 1 
H15A H 1.0420 0.1525 0.7499 0.105 Uiso 0.822(5) 1 calc PR A 1 
H15B H 0.9129 0.1565 0.6626 0.105 Uiso 0.822(5) 1 calc PR A 1 
H15C H 1.0203 0.1917 0.6322 0.105 Uiso 0.822(5) 1 calc PR A 1 
C16 C 0.9950(6) 0.0260(3) 0.6713(6) 0.0702(12) Uiso 0.822(5) 1 d PD A 1 
H16A H 1.0045 -0.0131 0.6280 0.105 Uiso 0.822(5) 1 calc PR A 1 
H16B H 0.9145 0.0277 0.6766 0.105 Uiso 0.822(5) 1 calc PR A 1 
H16C H 1.0499 0.0238 0.7483 0.105 Uiso 0.822(5) 1 calc PR A 1 
C14A C 1.0869(14) 0.0221(5) 0.641(3) 0.0702(12) Uiso 0.178(5) 1 d PD A 2 
H14D H 1.0310 -0.0143 0.6190 0.105 Uiso 0.178(5) 1 calc PR A 2 
H14E H 1.1244 0.0206 0.7239 0.105 Uiso 0.178(5) 1 calc PR A 2 
H14F H 1.1468 0.0182 0.6011 0.105 Uiso 0.178(5) 1 calc PR A 2 
C15A C 1.1249(11) 0.1386(9) 0.650(3) 0.0702(12) Uiso 0.178(5) 1 d PD A 2 
H15D H 1.0970 0.1834 0.6282 0.105 Uiso 0.178(5) 1 calc PR A 2 
H15E H 1.1866 0.1273 0.6152 0.105 Uiso 0.178(5) 1 calc PR A 2 
H15F H 1.1566 0.1362 0.7338 0.105 Uiso 0.178(5) 1 calc PR A 2 
C16A C 0.935(2) 0.0977(8) 0.684(2) 0.0702(12) Uiso 0.178(5) 1 d PD A 2 
H16D H 0.8988 0.1414 0.6709 0.105 Uiso 0.178(5) 1 calc PR A 2 
H16E H 0.9787 0.0931 0.7651 0.105 Uiso 0.178(5) 1 calc PR A 2 
H16F H 0.8736 0.0640 0.6636 0.105 Uiso 0.178(5) 1 calc PR A 2 
C20 C 0.9475(3) 0.0417(2) 0.1815(3) 0.0333(8) Uani 1 1 d . B . 
C23 C 1.0194(4) -0.0011(2) 0.1203(4) 0.0494(12) Uani 1 1 d D . . 
C24 C 0.9841(17) -0.0755(3) 0.1124(13) 0.0810(15) Uiso 0.318(5) 1 d PD B 1 
H24A H 0.9793 -0.0907 0.1870 0.121 Uiso 0.318(5) 1 calc PR B 1 
H24B H 1.0433 -0.1013 0.0898 0.121 Uiso 0.318(5) 1 calc PR B 1 
H24C H 0.9077 -0.0811 0.0554 0.121 Uiso 0.318(5) 1 calc PR B 1 
C25 C 1.0022(13) 0.0306(10) -0.0001(8) 0.0810(15) Uiso 0.318(5) 1 d PD B 1 
H25A H 1.0316 0.0759 0.0090 0.121 Uiso 0.318(5) 1 calc PR B 1 
H25B H 0.9186 0.0307 -0.0423 0.121 Uiso 0.318(5) 1 calc PR B 1 
H25C H 1.0456 0.0050 -0.0425 0.121 Uiso 0.318(5) 1 calc PR B 1 
C26 C 1.1516(6) 0.0032(8) 0.1913(15) 0.0810(15) Uiso 0.318(5) 1 d PD B 1 
H26A H 1.1733 0.0494 0.2088 0.121 Uiso 0.318(5) 1 calc PR B 1 
H26B H 1.2004 -0.0155 0.1468 0.121 Uiso 0.318(5) 1 calc PR B 1 
H26C H 1.1640 -0.0215 0.2626 0.121 Uiso 0.318(5) 1 calc PR B 1 
C24A C 0.9334(8) -0.0409(5) 0.0214(7) 0.0810(15) Uiso 0.682(5) 1 d PD B 2 
H24D H 0.8868 -0.0103 -0.0359 0.121 Uiso 0.682(5) 1 calc PR B 2 
H24E H 0.8810 -0.0674 0.0523 0.121 Uiso 0.682(5) 1 calc PR B 2 
H24F H 0.9786 -0.0698 -0.0142 0.121 Uiso 0.682(5) 1 calc PR B 2 
C25A C 1.1063(7) 0.0405(5) 0.0738(8) 0.0810(15) Uiso 0.682(5) 1 d PD B 2 
H25D H 1.0629 0.0754 0.0238 0.121 Uiso 0.682(5) 1 calc PR B 2 
H25E H 1.1443 0.0120 0.0305 0.121 Uiso 0.682(5) 1 calc PR B 2 
H25F H 1.1660 0.0603 0.1379 0.121 Uiso 0.682(5) 1 calc PR B 2 
C26A C 1.0943(8) -0.0505(4) 0.2105(7) 0.0810(15) Uiso 0.682(5) 1 d PD B 2 
H26D H 1.1391 -0.0262 0.2783 0.121 Uiso 0.682(5) 1 calc PR B 2 
H26E H 1.1484 -0.0741 0.1775 0.121 Uiso 0.682(5) 1 calc PR B 2 
H26F H 1.0422 -0.0820 0.2322 0.121 Uiso 0.682(5) 1 calc PR B 2 
C30 C 0.5412(3) 0.0883(2) 0.3790(3) 0.0322(8) Uani 1 1 d . C . 
C33 C 0.4956(4) 0.07882(19) 0.4848(4) 0.0504(12) Uani 1 1 d D . . 
C34 C 0.5743(6) 0.0306(4) 0.5745(6) 0.0723(13) Uiso 0.767(6) 1 d PD C 1 
H34A H 0.5856 -0.0102 0.5363 0.109 Uiso 0.767(6) 1 calc PR C 1 
H34B H 0.5360 0.0206 0.6335 0.109 Uiso 0.767(6) 1 calc PR C 1 
H34C H 0.6506 0.0511 0.6098 0.109 Uiso 0.767(6) 1 calc PR C 1 
C35 C 0.3779(5) 0.0402(4) 0.4360(7) 0.0723(13) Uiso 0.767(6) 1 d PD C 1 
H35A H 0.3934 -0.0010 0.4015 0.109 Uiso 0.767(6) 1 calc PR C 1 
H35B H 0.3230 0.0670 0.3780 0.109 Uiso 0.767(6) 1 calc PR C 1 
H35C H 0.3436 0.0304 0.4980 0.109 Uiso 0.767(6) 1 calc PR C 1 
C36 C 0.4649(8) 0.1456(3) 0.5330(7) 0.0723(13) Uiso 0.767(6) 1 d PD C 1 
H36A H 0.4261 0.1747 0.4695 0.109 Uiso 0.767(6) 1 calc PR C 1 
H36B H 0.5372 0.1665 0.5796 0.109 Uiso 0.767(6) 1 calc PR C 1 
H36C H 0.4124 0.1375 0.5802 0.109 Uiso 0.767(6) 1 calc PR C 1 
C34A C 0.6151(12) 0.0801(8) 0.5815(16) 0.0723(13) Uiso 0.233(6) 1 d PD C 2 
H34D H 0.6542 0.1223 0.5799 0.109 Uiso 0.233(6) 1 calc PR C 2 
H34E H 0.6652 0.0443 0.5693 0.109 Uiso 0.233(6) 1 calc PR C 2 
H34F H 0.6006 0.0744 0.6559 0.109 Uiso 0.233(6) 1 calc PR C 2 
C35A C 0.4419(14) 0.0111(6) 0.5043(18) 0.0723(13) Uiso 0.233(6) 1 d PD C 2 
H35D H 0.4952 -0.0245 0.4976 0.109 Uiso 0.233(6) 1 calc PR C 2 
H35E H 0.3660 0.0050 0.4468 0.109 Uiso 0.233(6) 1 calc PR C 2 
H35F H 0.4311 0.0102 0.5807 0.109 Uiso 0.233(6) 1 calc PR C 2 
C36A C 0.3875(9) 0.1244(8) 0.477(2) 0.0723(13) Uiso 0.233(6) 1 d PD C 2 
H36D H 0.4106 0.1705 0.4733 0.109 Uiso 0.233(6) 1 calc PR C 2 
H36E H 0.3598 0.1178 0.5439 0.109 Uiso 0.233(6) 1 calc PR C 2 
H36F H 0.3244 0.1136 0.4075 0.109 Uiso 0.233(6) 1 calc PR C 2 
C40 C 0.5411(4) 0.0281(2) 0.0667(4) 0.0389(9) Uani 1 1 d . D . 
C43 C 0.4773(4) -0.0108(2) -0.0445(4) 0.0584(15) Uani 1 1 d D . . 
C44 C 0.4176(6) -0.0720(3) -0.0070(7) 0.0802(13) Uiso 0.910(6) 1 d PD D 1 
H44A H 0.4764 -0.0970 0.0505 0.120 Uiso 0.910(6) 1 calc PR D 1 
H44B H 0.3834 -0.0999 -0.0735 0.120 Uiso 0.910(6) 1 calc PR D 1 
H44C H 0.3558 -0.0572 0.0255 0.120 Uiso 0.910(6) 1 calc PR D 1 
C45 C 0.3864(5) 0.0343(3) -0.1300(5) 0.0802(13) Uiso 0.910(6) 1 d PD D 1 
H45A H 0.4264 0.0734 -0.1473 0.120 Uiso 0.910(6) 1 calc PR D 1 
H45B H 0.3253 0.0478 -0.0955 0.120 Uiso 0.910(6) 1 calc PR D 1 
H45C H 0.3507 0.0100 -0.2006 0.120 Uiso 0.910(6) 1 calc PR D 1 
C46 C 0.5697(6) -0.0335(4) -0.1054(6) 0.0802(13) Uiso 0.910(6) 1 d PD D 1 
H46A H 0.6073 0.0052 -0.1274 0.120 Uiso 0.910(6) 1 calc PR D 1 
H46B H 0.5304 -0.0589 -0.1738 0.120 Uiso 0.910(6) 1 calc PR D 1 
H46C H 0.6293 -0.0609 -0.0531 0.120 Uiso 0.910(6) 1 calc PR D 1 
C44A C 0.445(6) -0.0767(14) -0.113(3) 0.0802(13) Uiso 0.090(6) 1 d PD D 2 
H44D H 0.3828 -0.0685 -0.1836 0.120 Uiso 0.090(6) 1 calc PR D 2 
H44E H 0.4181 -0.1088 -0.0662 0.120 Uiso 0.090(6) 1 calc PR D 2 
H44F H 0.5146 -0.0938 -0.1308 0.120 Uiso 0.090(6) 1 calc PR D 2 
C45A C 0.3410(7) -0.012(3) -0.067(5) 0.0802(13) Uiso 0.090(6) 1 d PD D 2 
H45D H 0.3130 0.0319 -0.0566 0.120 Uiso 0.090(6) 1 calc PR D 2 
H45E H 0.3210 -0.0428 -0.0137 0.120 Uiso 0.090(6) 1 calc PR D 2 
H45F H 0.3038 -0.0269 -0.1457 0.120 Uiso 0.090(6) 1 calc PR D 2 
C46A C 0.497(5) 0.022(2) -0.153(4) 0.0802(13) Uiso 0.090(6) 1 d PD D 2 
H46D H 0.4698 0.0674 -0.1593 0.120 Uiso 0.090(6) 1 calc PR D 2 
H46E H 0.4535 -0.0027 -0.2214 0.120 Uiso 0.090(6) 1 calc PR D 2 
H46F H 0.5811 0.0209 -0.1477 0.120 Uiso 0.090(6) 1 calc PR D 2 
C50 C 0.7255(4) 0.2176(2) 0.0210(3) 0.0317(8) Uani 1 1 d . E . 
C53 C 0.7359(4) 0.2310(2) -0.0990(3) 0.0432(10) Uani 1 1 d D . . 
C54 C 0.7618(9) 0.1623(3) -0.1443(8) 0.0964(17) Uiso 0.779(6) 1 d PD E 1 
H54A H 0.6985 0.1317 -0.1437 0.145 Uiso 0.779(6) 1 calc PR E 1 
H54B H 0.8363 0.1453 -0.0950 0.145 Uiso 0.779(6) 1 calc PR E 1 
H54C H 0.7670 0.1670 -0.2225 0.145 Uiso 0.779(6) 1 calc PR E 1 
C55 C 0.8472(6) 0.2721(5) -0.0984(9) 0.0964(17) Uiso 0.779(6) 1 d PD E 1 
H55A H 0.9161 0.2533 -0.0428 0.145 Uiso 0.779(6) 1 calc PR E 1 
H55B H 0.8366 0.3177 -0.0775 0.145 Uiso 0.779(6) 1 calc PR E 1 
H55C H 0.8585 0.2710 -0.1747 0.145 Uiso 0.779(6) 1 calc PR E 1 
C56 C 0.6202(6) 0.2594(5) -0.1818(7) 0.0964(17) Uiso 0.779(6) 1 d PD E 1 
H56A H 0.5580 0.2262 -0.1946 0.145 Uiso 0.779(6) 1 calc PR E 1 
H56B H 0.6336 0.2709 -0.2548 0.145 Uiso 0.779(6) 1 calc PR E 1 
H56C H 0.5966 0.2987 -0.1478 0.145 Uiso 0.779(6) 1 calc PR E 1 
C54A C 0.8559(12) 0.2117(9) -0.119(3) 0.0964(17) Uiso 0.221(6) 1 d PD E 2 
H54D H 0.9197 0.2349 -0.0632 0.145 Uiso 0.221(6) 1 calc PR E 2 
H54E H 0.8553 0.2239 -0.1962 0.145 Uiso 0.221(6) 1 calc PR E 2 
H54F H 0.8677 0.1641 -0.1084 0.145 Uiso 0.221(6) 1 calc PR E 2 
C55A C 0.7369(15) 0.3075(3) -0.114(3) 0.0964(17) Uiso 0.221(6) 1 d PD E 2 
H55D H 0.7934 0.3271 -0.0474 0.145 Uiso 0.221(6) 1 calc PR E 2 
H55E H 0.6585 0.3251 -0.1214 0.145 Uiso 0.221(6) 1 calc PR E 2 
H55F H 0.7596 0.3181 -0.1830 0.145 Uiso 0.221(6) 1 calc PR E 2 
C56A C 0.6483(18) 0.1923(8) -0.1983(19) 0.0964(17) Uiso 0.221(6) 1 d PD E 2 
H56D H 0.5703 0.1923 -0.1865 0.145 Uiso 0.221(6) 1 calc PR E 2 
H56E H 0.6756 0.1468 -0.1990 0.145 Uiso 0.221(6) 1 calc PR E 2 
H56F H 0.6442 0.2134 -0.2713 0.145 Uiso 0.221(6) 1 calc PR E 2 
C60 C 0.7181(4) 0.27425(19) 0.3395(3) 0.0293(8) Uani 1 1 d . . . 
C63 C 0.7057(4) 0.3261(2) 0.4316(4) 0.0325(9) Uani 1 1 d . . . 
C64 C 0.7650(5) 0.2968(3) 0.5512(4) 0.0547(13) Uiso 1 1 d . . . 
H64A H 0.7239 0.2566 0.5614 0.082 Uiso 1 1 calc R . . 
H64B H 0.7616 0.3289 0.6100 0.082 Uiso 1 1 calc R . . 
H64C H 0.8471 0.2865 0.5579 0.082 Uiso 1 1 calc R . . 
C65 C 0.7716(5) 0.3900(3) 0.4151(5) 0.0525(12) Uiso 1 1 d . . . 
H65A H 0.8534 0.3794 0.4206 0.079 Uiso 1 1 calc R . . 
H65B H 0.7695 0.4220 0.4745 0.079 Uiso 1 1 calc R . . 
H65C H 0.7335 0.4089 0.3398 0.079 Uiso 1 1 calc R . . 
C66 C 0.5744(5) 0.3404(3) 0.4202(5) 0.0620(14) Uiso 1 1 d . . . 
H66A H 0.5356 0.2997 0.4319 0.093 Uiso 1 1 calc R . . 
H66B H 0.5360 0.3578 0.3437 0.093 Uiso 1 1 calc R . . 
H66C H 0.5691 0.3729 0.4777 0.093 Uiso 1 1 calc R . . 
C102 C 1.1485(4) 0.2146(3) 0.2943(4) 0.0443(11) Uani 1 1 d . . . 
H10A H 1.1596 0.1690 0.3109 0.053 Uiso 1 1 calc R . . 
C103 C 1.2470(5) 0.2524(3) 0.2918(5) 0.0542(13) Uani 1 1 d . . . 
H10B H 1.3221 0.2326 0.3057 0.065 Uiso 1 1 calc R . . 
C104 C 1.2315(5) 0.3199(3) 0.2682(5) 0.0597(14) Uani 1 1 d . . . 
H10C H 1.2959 0.3466 0.2654 0.072 Uiso 1 1 calc R . . 
C105 C 1.1198(5) 0.3471(3) 0.2488(5) 0.0537(13) Uani 1 1 d . . . 
H10D H 1.1074 0.3927 0.2338 0.064 Uiso 1 1 calc R . . 
C106 C 1.0252(4) 0.3057(2) 0.2518(4) 0.0418(10) Uani 1 1 d . . . 
H10E H 0.9494 0.3244 0.2376 0.050 Uiso 1 1 calc R . . 
C202 C 0.6518(4) -0.1071(2) 0.3358(4) 0.0432(11) Uani 1 1 d . . . 
H20A H 0.5781 -0.0866 0.3031 0.052 Uiso 1 1 calc R . . 
C203 C 0.6532(5) -0.1733(2) 0.3717(4) 0.0501(12) Uani 1 1 d . . . 
H20B H 0.5821 -0.1966 0.3633 0.060 Uiso 1 1 calc R . . 
C204 C 0.7613(5) -0.2037(2) 0.4199(4) 0.0524(13) Uani 1 1 d . . . 
H20C H 0.7645 -0.2481 0.4441 0.063 Uiso 1 1 calc R . . 
C205 C 0.8664(5) -0.1678(2) 0.4324(4) 0.0486(11) Uani 1 1 d . . . 
H20D H 0.9409 -0.1873 0.4657 0.058 Uiso 1 1 calc R . . 
C206 C 0.8563(4) -0.1014(2) 0.3934(4) 0.0388(10) Uani 1 1 d . . . 
H20E H 0.9261 -0.0770 0.4009 0.047 Uiso 1 1 calc R . . 
C302 C 0.3985(4) 0.2747(2) 0.0312(4) 0.0438(11) Uani 1 1 d . . . 
H30A H 0.4689 0.2996 0.0475 0.053 Uiso 1 1 calc R . . 
C303 C 0.2953(5) 0.3019(3) -0.0452(5) 0.0607(14) Uani 1 1 d . . . 
H30B H 0.2976 0.3428 -0.0818 0.073 Uiso 1 1 calc R . . 
C304 C 0.1918(5) 0.2672(3) -0.0648(5) 0.0641(15) Uani 1 1 d . . . 
H30C H 0.1214 0.2848 -0.1138 0.077 Uiso 1 1 calc R . . 
C305 C 0.1904(5) 0.2060(3) -0.0126(6) 0.0668(16) Uani 1 1 d . . . 
H30D H 0.1200 0.1815 -0.0251 0.080 Uiso 1 1 calc R . . 
C306 C 0.2983(4) 0.1819(3) 0.0598(4) 0.0523(12) Uani 1 1 d . . . 
H30E H 0.2982 0.1402 0.0946 0.063 Uiso 1 1 calc R . . 
 
loop_ 
 _atom_site_aniso_label 
 _atom_site_aniso_U_11 
 _atom_site_aniso_U_22 
 _atom_site_aniso_U_33 
 _atom_site_aniso_U_23 
 _atom_site_aniso_U_13 
 _atom_site_aniso_U_12 
Fe1 0.0410(3) 0.0267(3) 0.0255(2) 0.0011(2) 0.0104(2) 0.0025(3) 
Fe2 0.0347(3) 0.0264(3) 0.0275(3) 0.0016(2) 0.0075(2) -0.0011(2) 
Fe3 0.0418(3) 0.0278(3) 0.0277(3) -0.0017(2) 0.0107(2) -0.0049(3) 
O1 0.0288(14) 0.0287(13) 0.0259(13) 0.0020(10) 0.0064(11) 0.0000(11) 
O11 0.0387(17) 0.0429(16) 0.0367(16) 0.0105(13) 0.0043(13) -0.0070(13) 
O12 0.0444(17) 0.0361(16) 0.0335(15) 0.0043(12) 0.0020(13) -0.0082(13) 
O22 0.0447(18) 0.0304(14) 0.0535(19) 0.0038(13) 0.0239(16) 0.0033(13) 
O21 0.0428(17) 0.0304(15) 0.0560(19) -0.0061(13) 0.0196(15) -0.0053(13) 
O31 0.0462(16) 0.0316(14) 0.0444(16) 0.0030(14) 0.0229(13) 0.0001(14) 
O32 0.0474(18) 0.0357(16) 0.0435(17) 0.0111(13) 0.0182(15) 0.0021(13) 
O41 0.0406(17) 0.0318(15) 0.0338(15) 0.0002(12) -0.0020(13) 0.0027(12) 
O42 0.0429(17) 0.0348(16) 0.0453(18) -0.0066(13) 0.0000(14) 0.0072(13) 
O51 0.0318(16) 0.060(2) 0.0342(15) 0.0074(13) 0.0090(13) -0.0015(14) 
O52 0.0339(16) 0.0463(17) 0.0315(15) 0.0089(13) 0.0039(12) -0.0072(13) 
O61 0.0386(17) 0.0365(16) 0.0393(16) -0.0049(13) 0.0005(14) -0.0023(13) 
O62 0.0320(16) 0.0373(15) 0.0470(17) -0.0101(13) 0.0153(14) -0.0034(12) 
N101 0.0321(18) 0.0334(17) 0.0289(17) -0.0018(14) 0.0063(14) -0.0005(14) 
N201 0.041(2) 0.0303(17) 0.0314(18) 0.0025(14) 0.0075(15) -0.0005(15) 
N301 0.0352(19) 0.0347(18) 0.046(2) -0.0057(16) 0.0172(16) -0.0030(15) 
C10 0.035(2) 0.0301(19) 0.032(2) -0.0003(16) 0.0129(17) 0.0024(16) 
C13 0.040(2) 0.036(2) 0.030(2) 0.0047(17) -0.0001(18) 0.0008(18) 
C20 0.036(2) 0.0301(19) 0.0316(19) -0.0010(17) 0.0059(16) 0.0013(18) 
C23 0.051(3) 0.044(3) 0.061(3) -0.002(2) 0.028(3) -0.001(2) 
C30 0.028(2) 0.037(2) 0.032(2) -0.0011(17) 0.0074(17) -0.0083(17) 
C33 0.062(3) 0.051(3) 0.050(3) 0.007(2) 0.036(3) 0.003(2) 
C40 0.042(2) 0.031(2) 0.038(2) -0.0040(18) 0.0038(18) 0.0014(19) 
C43 0.062(3) 0.045(3) 0.048(3) -0.018(2) -0.016(2) 0.012(2) 
C50 0.035(2) 0.032(2) 0.0289(19) 0.0014(16) 0.0103(17) 0.0046(16) 
C53 0.034(2) 0.064(3) 0.031(2) 0.005(2) 0.0083(18) 0.002(2) 
C60 0.039(2) 0.0246(18) 0.0265(18) 0.0027(15) 0.0134(17) -0.0052(16) 
C63 0.039(2) 0.0266(19) 0.035(2) -0.0030(16) 0.0154(18) 0.0020(16) 
C102 0.037(2) 0.053(3) 0.039(2) -0.003(2) 0.0051(19) 0.006(2) 
C103 0.038(3) 0.072(4) 0.053(3) -0.006(3) 0.013(2) -0.003(2) 
C104 0.045(3) 0.070(4) 0.065(3) -0.003(3) 0.017(3) -0.018(3) 
C105 0.056(3) 0.046(3) 0.059(3) 0.006(2) 0.016(3) -0.013(2) 
C106 0.041(3) 0.035(2) 0.051(3) 0.006(2) 0.017(2) 0.0009(19) 
C202 0.047(3) 0.032(2) 0.048(3) 0.0045(19) 0.010(2) -0.0072(19) 
C203 0.060(3) 0.031(2) 0.057(3) 0.008(2) 0.012(3) -0.014(2) 
C204 0.083(4) 0.030(2) 0.047(3) 0.009(2) 0.023(3) -0.002(2) 
C205 0.056(3) 0.038(2) 0.054(3) 0.009(2) 0.018(2) 0.009(2) 
C206 0.040(2) 0.037(2) 0.039(2) 0.0062(18) 0.011(2) 0.0001(19) 
C302 0.037(2) 0.035(2) 0.059(3) 0.006(2) 0.012(2) -0.0001(19) 
C303 0.059(3) 0.051(3) 0.067(4) 0.004(3) 0.008(3) 0.013(3) 
C304 0.051(3) 0.055(3) 0.073(4) -0.003(3) -0.004(3) 0.012(3) 
C305 0.035(3) 0.052(3) 0.102(5) -0.007(3) 0.001(3) -0.005(2) 
C306 0.049(3) 0.037(2) 0.069(3) -0.001(2) 0.015(2) -0.004(2) 
 
_geom_special_details 
; 
 All esds (except the esd in the dihedral angle between two l.s. planes) 
 are estimated using the full covariance matrix.  The cell esds are taken 
 into account individually in the estimation of esds in distances, angles 
 and torsion angles; correlations between esds in cell parameters are only 
 used when they are defined by crystal symmetry.  An approximate (isotropic) 
 treatment of cell esds is used for estimating esds involving l.s. planes. 
; 
 
loop_ 
 _geom_bond_atom_site_label_1 
 _geom_bond_atom_site_label_2 
 _geom_bond_distance 
 _geom_bond_site_symmetry_2 
 _geom_bond_publ_flag 
Fe1 O1 1.895(3) . ? 
Fe1 O52 2.022(3) . ? 
Fe1 O11 2.052(3) . ? 
Fe1 O62 2.056(3) . ? 
Fe1 O21 2.105(3) . ? 
Fe1 N101 2.249(3) . ? 
Fe1 Fe2 3.2615(8) . ? 
Fe1 Fe3 3.3597(9) . ? 
Fe2 O1 1.838(3) . ? 
Fe2 O31 2.012(3) . ? 
Fe2 O22 2.024(3) . ? 
Fe2 O41 2.036(3) . ? 
Fe2 O12 2.057(3) . ? 
Fe2 N201 2.252(3) . ? 
Fe2 Fe3 3.3080(8) . ? 
Fe3 O1 1.999(3) . ? 
Fe3 O61 2.062(3) . ? 
Fe3 O42 2.071(3) . ? 
Fe3 O51 2.090(3) . ? 
Fe3 O32 2.126(3) . ? 
Fe3 N301 2.213(4) . ? 
O11 C10 1.259(5) . ? 
O12 C10 1.255(5) . ? 
O22 C20 1.261(5) . ? 
O21 C20 1.252(5) . ? 
O31 C30 1.266(5) . ? 
O32 C30 1.251(5) . ? 
O41 C40 1.271(5) . ? 
O42 C40 1.237(5) . ? 
O51 C50 1.258(5) . ? 
O52 C50 1.258(5) . ? 
O61 C60 1.256(5) . ? 
O62 C60 1.253(5) . ? 
N101 C102 1.333(5) . ? 
N101 C106 1.341(5) . ? 
N201 C202 1.336(5) . ? 
N201 C206 1.336(5) . ? 
N301 C302 1.336(5) . ? 
N301 C306 1.329(6) . ? 
C10 C13 1.528(5) . ? 
C13 C14A 1.5338(10) . ? 
C13 C16 1.5333(10) . ? 
C13 C15 1.5334(10) . ? 
C13 C15A 1.5339(10) . ? 
C13 C14 1.5338(10) . ? 
C13 C16A 1.5339(10) . ? 
C20 C23 1.524(6) . ? 
C23 C24 1.5340(10) . ? 
C23 C25A 1.5336(10) . ? 
C23 C26A 1.5342(10) . ? 
C23 C26 1.5339(10) . ? 
C23 C24A 1.5339(10) . ? 
C23 C25 1.5342(10) . ? 
C30 C33 1.521(6) . ? 
C33 C35A 1.5336(10) . ? 
C33 C36 1.5333(10) . ? 
C33 C36A 1.5341(10) . ? 
C33 C34 1.5335(10) . ? 
C33 C35 1.5347(10) . ? 
C33 C34A 1.5344(10) . ? 
C40 C43 1.534(6) . ? 
C43 C44A 1.5340(11) . ? 
C43 C44 1.5339(10) . ? 
C43 C46 1.5340(10) . ? 
C43 C45A 1.5341(10) . ? 
C43 C45 1.5340(10) . ? 
C43 C46A 1.5340(10) . ? 
C50 C53 1.501(5) . ? 
C53 C55A 1.5342(11) . ? 
C53 C54 1.5342(10) . ? 
C53 C55 1.5335(10) . ? 
C53 C54A 1.5340(11) . ? 
C53 C56A 1.5338(10) . ? 
C53 C56 1.5334(10) . ? 
C60 C63 1.548(5) . ? 
C63 C65 1.530(6) . ? 
C63 C64 1.517(6) . ? 
C63 C66 1.525(7) . ? 
C102 C103 1.382(7) . ? 
C103 C104 1.375(8) . ? 
C104 C105 1.368(7) . ? 
C105 C106 1.386(6) . ? 
C202 C203 1.386(6) . ? 
C203 C204 1.367(7) . ? 
C204 C205 1.390(7) . ? 
C205 C206 1.395(6) . ? 
C302 C303 1.395(7) . ? 
C303 C304 1.352(8) . ? 
C304 C305 1.373(8) . ? 
C305 C306 1.391(7) . ? 
 
loop_ 
 _geom_angle_atom_site_label_1 
 _geom_angle_atom_site_label_2 
 _geom_angle_atom_site_label_3 
 _geom_angle 
 _geom_angle_site_symmetry_1 
 _geom_angle_site_symmetry_3 
 _geom_angle_publ_flag 
O1 Fe1 O52 96.00(11) . . ? 
O1 Fe1 O11 96.46(11) . . ? 
O52 Fe1 O11 167.24(12) . . ? 
O1 Fe1 O62 94.51(11) . . ? 
O52 Fe1 O62 93.50(13) . . ? 
O11 Fe1 O62 88.22(13) . . ? 
O1 Fe1 O21 94.55(11) . . ? 
O52 Fe1 O21 88.11(13) . . ? 
O11 Fe1 O21 88.21(13) . . ? 
O62 Fe1 O21 170.58(12) . . ? 
O1 Fe1 N101 177.37(12) . . ? 
O52 Fe1 N101 81.38(12) . . ? 
O11 Fe1 N101 86.17(12) . . ? 
O62 Fe1 N101 85.43(12) . . ? 
O21 Fe1 N101 85.64(12) . . ? 
O1 Fe1 Fe2 28.64(8) . . ? 
O52 Fe1 Fe2 116.25(8) . . ? 
O11 Fe1 Fe2 74.55(8) . . ? 
O62 Fe1 Fe2 111.55(8) . . ? 
O21 Fe1 Fe2 75.80(8) . . ? 
N101 Fe1 Fe2 153.42(9) . . ? 
O1 Fe1 Fe3 31.29(8) . . ? 
O52 Fe1 Fe3 72.92(8) . . ? 
O11 Fe1 Fe3 119.67(9) . . ? 
O62 Fe1 Fe3 75.37(8) . . ? 
O21 Fe1 Fe3 113.92(8) . . ? 
N101 Fe1 Fe3 146.56(9) . . ? 
Fe2 Fe1 Fe3 59.926(17) . . ? 
O1 Fe2 O31 95.99(12) . . ? 
O1 Fe2 O22 97.21(11) . . ? 
O31 Fe2 O22 166.79(12) . . ? 
O1 Fe2 O41 97.98(11) . . ? 
O31 Fe2 O41 91.41(12) . . ? 
O22 Fe2 O41 87.33(13) . . ? 
O1 Fe2 O12 95.13(11) . . ? 
O31 Fe2 O12 89.71(12) . . ? 
O22 Fe2 O12 88.55(13) . . ? 
O41 Fe2 O12 166.65(11) . . ? 
O1 Fe2 N201 178.03(12) . . ? 
O31 Fe2 N201 83.60(12) . . ? 
O22 Fe2 N201 83.20(12) . . ? 
O41 Fe2 N201 83.96(12) . . ? 
O12 Fe2 N201 82.95(12) . . ? 
O1 Fe2 Fe1 29.61(8) . . ? 
O31 Fe2 Fe1 117.56(9) . . ? 
O22 Fe2 Fe1 74.62(8) . . ? 
O41 Fe2 Fe1 115.17(8) . . ? 
O12 Fe2 Fe1 75.80(8) . . ? 
N201 Fe2 Fe1 149.41(9) . . ? 
O1 Fe2 Fe3 31.90(8) . . ? 
O31 Fe2 Fe3 72.17(8) . . ? 
O22 Fe2 Fe3 120.25(8) . . ? 
O41 Fe2 Fe3 77.77(8) . . ? 
O12 Fe2 Fe3 115.16(8) . . ? 
N201 Fe2 Fe3 149.01(9) . . ? 
Fe1 Fe2 Fe3 61.511(18) . . ? 
O1 Fe3 O61 94.33(11) . . ? 
O1 Fe3 O42 93.64(11) . . ? 
O61 Fe3 O42 171.82(12) . . ? 
O1 Fe3 O51 91.36(11) . . ? 
O61 Fe3 O51 92.79(12) . . ? 
O42 Fe3 O51 88.87(13) . . ? 
O1 Fe3 O32 93.02(11) . . ? 
O61 Fe3 O32 86.63(12) . . ? 
O42 Fe3 O32 91.11(12) . . ? 
O51 Fe3 O32 175.61(12) . . ? 
O1 Fe3 N301 174.27(12) . . ? 
O61 Fe3 N301 88.46(12) . . ? 
O42 Fe3 N301 83.77(12) . . ? 
O51 Fe3 N301 83.49(12) . . ? 
O32 Fe3 N301 92.14(12) . . ? 
O1 Fe3 Fe2 29.07(7) . . ? 
O61 Fe3 Fe2 116.19(8) . . ? 
O42 Fe3 Fe2 70.73(8) . . ? 
O51 Fe3 Fe2 107.97(9) . . ? 
O32 Fe3 Fe2 76.14(8) . . ? 
N301 Fe3 Fe2 151.43(9) . . ? 
O1 Fe3 Fe1 29.49(7) . . ? 
O61 Fe3 Fe1 71.83(8) . . ? 
O42 Fe3 Fe1 116.30(9) . . ? 
O51 Fe3 Fe1 74.08(8) . . ? 
O32 Fe3 Fe1 109.80(9) . . ? 
N301 Fe3 Fe1 148.97(9) . . ? 
Fe2 Fe3 Fe1 58.563(17) . . ? 
Fe2 O1 Fe1 121.76(14) . . ? 
Fe2 O1 Fe3 119.02(13) . . ? 
Fe1 O1 Fe3 119.22(13) . . ? 
C10 O11 Fe1 131.5(3) . . ? 
C10 O12 Fe2 130.3(3) . . ? 
C20 O22 Fe2 133.3(3) . . ? 
C20 O21 Fe1 128.6(3) . . ? 
C30 O31 Fe2 134.1(3) . . ? 
C30 O32 Fe3 126.1(3) . . ? 
C40 O41 Fe2 126.7(3) . . ? 
C40 O42 Fe3 133.8(3) . . ? 
C50 O51 Fe3 130.0(3) . . ? 
C50 O52 Fe1 132.6(3) . . ? 
C60 O61 Fe3 130.6(3) . . ? 
C60 O62 Fe1 129.0(3) . . ? 
C102 N101 C106 117.0(4) . . ? 
C102 N101 Fe1 123.5(3) . . ? 
C106 N101 Fe1 119.2(3) . . ? 
C202 N201 C206 117.8(4) . . ? 
C202 N201 Fe2 120.8(3) . . ? 
C206 N201 Fe2 121.4(3) . . ? 
C302 N301 C306 116.5(4) . . ? 
C302 N301 Fe3 120.1(3) . . ? 
C306 N301 Fe3 122.7(3) . . ? 
O11 C10 O12 125.4(4) . . ? 
O11 C10 C13 116.6(3) . . ? 
O12 C10 C13 117.9(3) . . ? 
C10 C13 C14A 113.7(13) . . ? 
C10 C13 C16 112.3(4) . . ? 
C14A C13 C16 47.2(7) . . ? 
C10 C13 C15 106.8(4) . . ? 
C14A C13 C15 139.1(14) . . ? 
C16 C13 C15 111.8(4) . . ? 
C10 C13 C15A 118.4(13) . . ? 
C14A C13 C15A 100.5(12) . . ? 
C16 C13 C15A 128.2(13) . . ? 
C15 C13 C15A 63.0(4) . . ? 
C10 C13 C14 107.9(4) . . ? 
C14A C13 C14 64.0(4) . . ? 
C16 C13 C14 109.1(4) . . ? 
C15 C13 C14 108.7(4) . . ? 
C15A C13 C14 45.8(6) . . ? 
C10 C13 C16A 106.2(13) . . ? 
C14A C13 C16A 108.5(11) . . ? 
C16 C13 C16A 63.7(4) . . ? 
C15 C13 C16A 52.8(8) . . ? 
C15A C13 C16A 109.3(13) . . ? 
C14 C13 C16A 145.0(14) . . ? 
O21 C20 O22 125.4(4) . . ? 
O21 C20 C23 119.3(4) . . ? 
O22 C20 C23 115.3(4) . . ? 
C20 C23 C24 113.3(9) . . ? 
C20 C23 C25A 112.7(5) . . ? 
C24 C23 C25A 133.9(9) . . ? 
C20 C23 C26A 107.5(5) . . ? 
C24 C23 C26A 60.8(7) . . ? 
C25A C23 C26A 107.5(6) . . ? 
C20 C23 C26 107.9(9) . . ? 
C24 C23 C26 107.3(9) . . ? 
C25A C23 C26 60.4(7) . . ? 
C26A C23 C26 50.8(4) . . ? 
C20 C23 C24A 109.4(5) . . ? 
C24 C23 C24A 49.4(4) . . ? 
C25A C23 C24A 110.6(6) . . ? 
C26A C23 C24A 109.0(6) . . ? 
C26 C23 C24A 141.8(9) . . ? 
C20 C23 C25 106.4(9) . . ? 
C24 C23 C25 112.3(10) . . ? 
C25A C23 C25 49.9(4) . . ? 
C26A C23 C25 145.0(9) . . ? 
C26 C23 C25 109.6(8) . . ? 
C24A C23 C25 66.8(8) . . ? 
O32 C30 O31 124.9(4) . . ? 
O32 C30 C33 119.1(4) . . ? 
O31 C30 C33 116.0(4) . . ? 
C35A C33 C36 123.8(11) . . ? 
C35A C33 C36A 99.6(12) . . ? 
C36 C33 C36A 40.0(4) . . ? 
C35A C33 C34 62.0(6) . . ? 
C36 C33 C34 115.9(5) . . ? 
C36A C33 C34 137.0(11) . . ? 
C35A C33 C35 42.0(4) . . ? 
C36 C33 C35 107.4(5) . . ? 
C36A C33 C35 69.2(7) . . ? 
C34 C33 C35 104.0(5) . . ? 
C35A C33 C34A 102.8(8) . . ? 
C36 C33 C34A 87.8(9) . . ? 
C36A C33 C34A 126.1(11) . . ? 
C34 C33 C34A 41.5(4) . . ? 
C35 C33 C34A 144.5(7) . . ? 
C35A C33 C30 119.5(10) . . ? 
C36 C33 C30 112.5(4) . . ? 
C36A C33 C30 110.6(11) . . ? 
C34 C33 C30 112.2(4) . . ? 
C35 C33 C30 103.5(4) . . ? 
C34A C33 C30 99.6(10) . . ? 
O42 C40 O41 125.7(4) . . ? 
O42 C40 C43 118.5(4) . . ? 
O41 C40 C43 115.7(4) . . ? 
C44A C43 C44 54.2(4) . . ? 
C44A C43 C46 65.9(19) . . ? 
C44 C43 C46 110.3(5) . . ? 
C44A C43 C45A 79(4) . . ? 
C44 C43 C45A 60.1(11) . . ? 
C46 C43 C45A 138(3) . . ? 
C44A C43 C45 97(3) . . ? 
C44 C43 C45 112.1(5) . . ? 
C46 C43 C45 107.5(5) . . ? 
C45A C43 C45 53.9(4) . . ? 
C44A C43 C46A 89(3) . . ? 
C44 C43 C46A 141(3) . . ? 
C46 C43 C46A 54.5(4) . . ? 
C45A C43 C46A 105(2) . . ? 
C45 C43 C46A 55.3(11) . . ? 
C44A C43 C40 151(2) . . ? 
C44 C43 C40 107.1(4) . . ? 
C46 C43 C40 109.3(4) . . ? 
C45A C43 C40 112(3) . . ? 
C45 C43 C40 110.7(4) . . ? 
C46A C43 C40 112(3) . . ? 
O51 C50 O52 125.1(4) . . ? 
O51 C50 C53 117.6(3) . . ? 
O52 C50 C53 117.3(4) . . ? 
C50 C53 C55A 107.2(13) . . ? 
C50 C53 C54 105.0(5) . . ? 
C55A C53 C54 146.6(13) . . ? 
C50 C53 C55 113.2(5) . . ? 
C55A C53 C55 55.6(4) . . ? 
C54 C53 C55 103.0(6) . . ? 
C50 C53 C54A 115.5(13) . . ? 
C55A C53 C54A 101.1(10) . . ? 
C54 C53 C54A 55.9(4) . . ? 
C55 C53 C54A 47.6(7) . . ? 
C50 C53 C56A 115.7(13) . . ? 
C55A C53 C56A 115.7(14) . . ? 
C54 C53 C56A 55.4(7) . . ? 
C55 C53 C56A 130.2(14) . . ? 
C54A C53 C56A 100.8(13) . . ? 
C50 C53 C56 112.7(5) . . ? 
C55A C53 C56 66.0(10) . . ? 
C54 C53 C56 109.1(6) . . ? 
C55 C53 C56 113.1(6) . . ? 
C54A C53 C56 131.7(14) . . ? 
C56A C53 C56 54.5(4) . . ? 
O62 C60 O61 126.1(4) . . ? 
O62 C60 C63 116.4(3) . . ? 
O61 C60 C63 117.5(4) . . ? 
C65 C63 C64 109.5(4) . . ? 
C65 C63 C66 111.2(4) . . ? 
C64 C63 C66 109.2(4) . . ? 
C65 C63 C60 108.0(3) . . ? 
C64 C63 C60 107.8(3) . . ? 
C66 C63 C60 111.0(4) . . ? 
N101 C102 C103 123.7(5) . . ? 
C104 C103 C102 118.5(5) . . ? 
C103 C104 C105 119.0(5) . . ? 
C104 C105 C106 119.1(5) . . ? 
N101 C106 C105 122.8(4) . . ? 
N201 C202 C203 123.1(5) . . ? 
C204 C203 C202 118.6(4) . . ? 
C203 C204 C205 119.7(4) . . ? 
C204 C205 C206 117.7(5) . . ? 
N201 C206 C205 123.1(4) . . ? 
N301 C302 C303 123.4(4) . . ? 
C304 C303 C302 118.3(5) . . ? 
C303 C304 C305 120.2(5) . . ? 
C304 C305 C306 117.6(5) . . ? 
N301 C306 C305 124.0(5) . . ? 
 
_diffrn_measured_fraction_theta_max    0.960 
_diffrn_reflns_theta_full              29.99 
_diffrn_measured_fraction_theta_full   0.960 
_refine_diff_density_max    1.010 
_refine_diff_density_min   -0.564 
_refine_diff_density_rms    0.075 
#===END
 
data_fe200cs 
 
_audit_creation_method            SHELXL-97 
_chemical_name_systematic 
; 
 ? 
; 
_chemical_name_common             ? 
_chemical_melting_point           ? 
_chemical_formula_moiety          ? 
_chemical_formula_sum 
 'C45 H69 Fe3 N3 O13' 
_chemical_formula_weight          1027.58 
 
loop_ 
 _atom_type_symbol 
 _atom_type_description 
 _atom_type_scat_dispersion_real 
 _atom_type_scat_dispersion_imag 
 _atom_type_scat_source 
 'C'  'C'   0.0033   0.0016 
 'International Tables Vol C Tables 4.2.6.8 and 6.1.1.4' 
 'H'  'H'   0.0000   0.0000 
 'International Tables Vol C Tables 4.2.6.8 and 6.1.1.4' 
 'N'  'N'   0.0061   0.0033 
 'International Tables Vol C Tables 4.2.6.8 and 6.1.1.4' 
 'O'  'O'   0.0106   0.0060 
 'International Tables Vol C Tables 4.2.6.8 and 6.1.1.4' 
 'Fe'  'Fe'   0.3463   0.8444 
 'International Tables Vol C Tables 4.2.6.8 and 6.1.1.4' 
 
_symmetry_cell_setting            ? 
_symmetry_space_group_name_H-M    ? 
 
loop_ 
 _symmetry_equiv_pos_as_xyz 
 'x, y, z' 
 '-x, y+1/2, -z' 
 
_cell_length_a                    11.6970(10) 
_cell_length_b                    20.018(2) 
_cell_length_c                    11.9780(10) 
_cell_angle_alpha                 90.00 
_cell_angle_beta                  106.903(2) 
_cell_angle_gamma                 90.00 
_cell_volume                      2683.5(4) 
_cell_formula_units_Z             2 
_cell_measurement_temperature     293(2) 
_cell_measurement_reflns_used     ? 
_cell_measurement_theta_min       ? 
_cell_measurement_theta_max       ? 
 
_exptl_crystal_description        ? 
_exptl_crystal_colour             ? 
_exptl_crystal_size_max           ? 
_exptl_crystal_size_mid           ? 
_exptl_crystal_size_min           ? 
_exptl_crystal_density_meas       ? 
_exptl_crystal_density_diffrn     1.272 
_exptl_crystal_density_method     'not measured' 
_exptl_crystal_F_000              1084 
_exptl_absorpt_coefficient_mu     0.858 
_exptl_absorpt_correction_type    ? 
_exptl_absorpt_correction_T_min   ? 
_exptl_absorpt_correction_T_max   ? 
_exptl_absorpt_process_details    ? 
 
_exptl_special_details 
; 
 ? 
; 
 
_diffrn_ambient_temperature       293(2) 
_diffrn_radiation_wavelength      0.71073 
_diffrn_radiation_type            MoK\a 
_diffrn_radiation_source          'fine-focus sealed tube' 
_diffrn_radiation_monochromator   graphite 
_diffrn_measurement_device_type   ? 
_diffrn_measurement_method        ? 
_diffrn_detector_area_resol_mean  ? 
_diffrn_standards_number          ? 
_diffrn_standards_interval_count  ? 
_diffrn_standards_interval_time   ? 
_diffrn_standards_decay_%         ? 
_diffrn_reflns_number             11524 
_diffrn_reflns_av_R_equivalents   0.0000 
_diffrn_reflns_av_sigmaI/netI     0.0401 
_diffrn_reflns_limit_h_min        -15 
_diffrn_reflns_limit_h_max        15 
_diffrn_reflns_limit_k_min        -26 
_diffrn_reflns_limit_k_max        26 
_diffrn_reflns_limit_l_min        0 
_diffrn_reflns_limit_l_max        16 
_diffrn_reflns_theta_min          2.37 
_diffrn_reflns_theta_max          29.34 
_reflns_number_total              11524 
_reflns_number_gt                 10716 
_reflns_threshold_expression      >2sigma(I) 
 
_computing_data_collection        ? 
_computing_cell_refinement        ? 
_computing_data_reduction         ? 
_computing_structure_solution     'SHELXS-97 (Sheldrick, 1990)' 
_computing_structure_refinement   'SHELXL-97 (Sheldrick, 1997)' 
_computing_molecular_graphics     ? 
_computing_publication_material   ? 
 
_refine_special_details 
; 
 Refinement of F^2^ against ALL reflections.  The weighted R-factor wR and 
 goodness of fit S are based on F^2^, conventional R-factors R are based 
 on F, with F set to zero for negative F^2^. The threshold expression of 
 F^2^ > 2sigma(F^2^) is used only for calculating R-factors(gt) etc. and is 
 not relevant to the choice of reflections for refinement.  R-factors based 
 on F^2^ are statistically about twice as large as those based on F, and R- 
 factors based on ALL data will be even larger. 
; 
 
_refine_ls_structure_factor_coef  Fsqd  
_refine_ls_matrix_type            full 
_refine_ls_weighting_scheme       calc  
_refine_ls_weighting_details 
 'calc w=1/[\s^2^(Fo^2^)+(0.0593P)^2^+2.3575P] where P=(Fo^2^+2Fc^2^)/3' 
_atom_sites_solution_primary      direct 
_atom_sites_solution_secondary    difmap 
_atom_sites_solution_hydrogens    geom 
_refine_ls_hydrogen_treatment     mixed 
_refine_ls_extinction_method      none 
_refine_ls_extinction_coef        ? 
_refine_ls_abs_structure_details 
 'Flack H D (1983), Acta Cryst. A39, 876-881' 
_refine_ls_abs_structure_Flack    0.013(17) 
_refine_ls_number_reflns          11524 
_refine_ls_number_parameters      528 
_refine_ls_number_restraints      46 
_refine_ls_R_factor_all           0.0576 
_refine_ls_R_factor_gt            0.0520 
_refine_ls_wR_factor_ref          0.1391 
_refine_ls_wR_factor_gt           0.1322 
_refine_ls_goodness_of_fit_ref    1.153 
_refine_ls_restrained_S_all       1.157 
_refine_ls_shift/su_max           3.110 
_refine_ls_shift/su_mean          0.102 
 
loop_ 
 _atom_site_label 
 _atom_site_type_symbol 
 _atom_site_fract_x 
 _atom_site_fract_y 
 _atom_site_fract_z 
 _atom_site_U_iso_or_equiv 
 _atom_site_adp_type 
 _atom_site_occupancy 
 _atom_site_symmetry_multiplicity 
 _atom_site_calc_flag 
 _atom_site_refinement_flags 
 _atom_site_disorder_assembly 
 _atom_site_disorder_group 
Fe1 Fe 0.87452(5) 0.17530(7) 0.26076(4) 0.03491(12) Uani 1 1 d . . . 
Fe2 Fe 0.74010(5) 0.03550(7) 0.28386(5) 0.03496(12) Uani 1 1 d . . . 
Fe3 Fe 0.57554(5) 0.16704(7) 0.17386(5) 0.03674(13) Uani 1 1 d . . . 
O1 O 0.7339(2) 0.12428(14) 0.2415(2) 0.0309(5) Uani 1 1 d . . . 
O11 O 0.9666(3) 0.13739(17) 0.4205(3) 0.0481(7) Uani 1 1 d . . . 
O12 O 0.8600(3) 0.04923(17) 0.4451(3) 0.0467(7) Uani 1 1 d . . . 
O22 O 0.8781(3) 0.00929(17) 0.2232(3) 0.0495(7) Uani 1 1 d . . . 
O21 O 0.9586(3) 0.10366(17) 0.1836(3) 0.0502(8) Uani 1 1 d . . . 
O31 O 0.6049(3) 0.03953(18) 0.3556(3) 0.0470(7) Uani 1 1 d . . . 
O32 O 0.5104(3) 0.13672(17) 0.3139(3) 0.0497(7) Uani 1 1 d . . . 
O41 O 0.6293(3) -0.00081(16) 0.1314(3) 0.0464(7) Uani 1 1 d . . . 
O42 O 0.5024(3) 0.08395(18) 0.0787(3) 0.0531(8) Uani 1 1 d . . . 
O51 O 0.6248(3) 0.2012(2) 0.0302(3) 0.0507(8) Uani 1 1 d . . . 
O52 O 0.8197(3) 0.22086(18) 0.1040(3) 0.0467(7) Uani 1 1 d . . . 
O61 O 0.6225(3) 0.25534(17) 0.2630(3) 0.0486(7) Uani 1 1 d . . . 
O62 O 0.8192(3) 0.25262(17) 0.3463(3) 0.0460(7) Uani 1 1 d . . . 
N101 N 1.0374(3) 0.23897(19) 0.2752(3) 0.0406(7) Uani 1 1 d . . . 
N201 N 0.7499(3) -0.07174(19) 0.3412(3) 0.0427(8) Uani 1 1 d . . . 
N301 N 0.4019(3) 0.21342(19) 0.0824(3) 0.0433(8) Uani 1 1 d . . . 
C10 C 0.9423(3) 0.0915(2) 0.4808(3) 0.0358(8) Uani 1 1 d . A . 
C13 C 1.0196(3) 0.08641(19) 0.6062(3) 0.0455(10) Uani 1 1 d D . . 
C14 C 1.1506(4) 0.0857(5) 0.6057(9) 0.0839(14) Uiso 0.767(6) 1 d PD A 1 
H14A H 1.1647 0.0473 0.5636 0.126 Uiso 0.767(6) 1 calc PR A 1 
H14B H 1.2017 0.0839 0.6845 0.126 Uiso 0.767(6) 1 calc PR A 1 
H14C H 1.1674 0.1255 0.5686 0.126 Uiso 0.767(6) 1 calc PR A 1 
C15 C 0.9960(8) 0.1481(3) 0.6721(8) 0.0839(14) Uiso 0.767(6) 1 d PD A 1 
H15A H 1.0427 0.1453 0.7524 0.126 Uiso 0.767(6) 1 calc PR A 1 
H15B H 0.9127 0.1500 0.6674 0.126 Uiso 0.767(6) 1 calc PR A 1 
H15C H 1.0178 0.1877 0.6377 0.126 Uiso 0.767(6) 1 calc PR A 1 
C16 C 0.9970(8) 0.0220(3) 0.6659(8) 0.0839(14) Uiso 0.767(6) 1 d PD A 1 
H16A H 1.0072 -0.0158 0.6205 0.126 Uiso 0.767(6) 1 calc PR A 1 
H16B H 0.9169 0.0224 0.6719 0.126 Uiso 0.767(6) 1 calc PR A 1 
H16C H 1.0526 0.0193 0.7425 0.126 Uiso 0.767(6) 1 calc PR A 1 
C14A C 1.0845(14) 0.0191(5) 0.632(3) 0.0839(14) Uiso 0.233(6) 1 d PD A 2 
H14D H 1.0274 -0.0165 0.6096 0.126 Uiso 0.233(6) 1 calc PR A 2 
H14E H 1.1245 0.0159 0.7144 0.126 Uiso 0.233(6) 1 calc PR A 2 
H14F H 1.1420 0.0157 0.5895 0.126 Uiso 0.233(6) 1 calc PR A 2 
C15A C 1.1217(12) 0.1372(9) 0.646(3) 0.0839(14) Uiso 0.233(6) 1 d PD A 2 
H15D H 1.0917 0.1812 0.6228 0.126 Uiso 0.233(6) 1 calc PR A 2 
H15E H 1.1833 0.1266 0.6105 0.126 Uiso 0.233(6) 1 calc PR A 2 
H15F H 1.1539 0.1354 0.7293 0.126 Uiso 0.233(6) 1 calc PR A 2 
C16A C 0.934(2) 0.0920(8) 0.681(2) 0.0839(14) Uiso 0.233(6) 1 d PD A 2 
H16D H 0.8964 0.1351 0.6701 0.126 Uiso 0.233(6) 1 calc PR A 2 
H16E H 0.9778 0.0864 0.7621 0.126 Uiso 0.233(6) 1 calc PR A 2 
H16F H 0.8739 0.0578 0.6589 0.126 Uiso 0.233(6) 1 calc PR A 2 
C20 C 0.9454(3) 0.0416(2) 0.1791(3) 0.0393(8) Uani 1 1 d . B . 
C23 C 1.0176(5) 0.0005(2) 0.1168(5) 0.0651(14) Uani 1 1 d D . . 
C24 C 0.9817(18) -0.0734(4) 0.1070(16) 0.105(2) Uiso 0.410(7) 1 d PD B 1 
H24A H 0.9766 -0.0891 0.1812 0.157 Uiso 0.410(7) 1 calc PR B 1 
H24B H 1.0405 -0.0990 0.0840 0.157 Uiso 0.410(7) 1 calc PR B 1 
H24C H 0.9054 -0.0784 0.0497 0.157 Uiso 0.410(7) 1 calc PR B 1 
C25 C 1.0066(15) 0.0310(11) -0.0033(8) 0.105(2) Uiso 0.410(7) 1 d PD B 1 
H25A H 1.0360 0.0761 0.0061 0.157 Uiso 0.410(7) 1 calc PR B 1 
H25B H 0.9243 0.0309 -0.0492 0.157 Uiso 0.410(7) 1 calc PR B 1 
H25C H 1.0527 0.0051 -0.0421 0.157 Uiso 0.410(7) 1 calc PR B 1 
C26 C 1.1505(7) 0.0033(9) 0.1856(16) 0.105(2) Uiso 0.410(7) 1 d PD B 1 
H26A H 1.1739 0.0489 0.2039 0.157 Uiso 0.410(7) 1 calc PR B 1 
H26B H 1.1972 -0.0155 0.1393 0.157 Uiso 0.410(7) 1 calc PR B 1 
H26C H 1.1637 -0.0218 0.2565 0.157 Uiso 0.410(7) 1 calc PR B 1 
C24A C 0.9336(12) -0.0386(7) 0.0158(9) 0.105(2) Uiso 0.590(7) 1 d PD B 2 
H24D H 0.8873 -0.0080 -0.0411 0.157 Uiso 0.590(7) 1 calc PR B 2 
H24E H 0.8811 -0.0658 0.0451 0.157 Uiso 0.590(7) 1 calc PR B 2 
H24F H 0.9799 -0.0666 -0.0196 0.157 Uiso 0.590(7) 1 calc PR B 2 
C25A C 1.1079(10) 0.0414(7) 0.0745(12) 0.105(2) Uiso 0.590(7) 1 d PD B 2 
H25D H 1.0670 0.0766 0.0242 0.157 Uiso 0.590(7) 1 calc PR B 2 
H25E H 1.1468 0.0128 0.0323 0.157 Uiso 0.590(7) 1 calc PR B 2 
H25F H 1.1665 0.0603 0.1404 0.157 Uiso 0.590(7) 1 calc PR B 2 
C26A C 1.0925(12) -0.0497(6) 0.2050(11) 0.105(2) Uiso 0.590(7) 1 d PD B 2 
H26D H 1.1381 -0.0263 0.2735 0.157 Uiso 0.590(7) 1 calc PR B 2 
H26E H 1.1457 -0.0729 0.1706 0.157 Uiso 0.590(7) 1 calc PR B 2 
H26F H 1.0405 -0.0813 0.2259 0.157 Uiso 0.590(7) 1 calc PR B 2 
C30 C 0.5410(3) 0.0857(2) 0.3750(4) 0.0379(8) Uani 1 1 d . C . 
C33 C 0.4965(4) 0.0771(2) 0.4829(5) 0.0600(13) Uani 1 1 d D . . 
C34 C 0.5676(10) 0.0244(5) 0.5678(9) 0.0900(17) Uiso 0.669(7) 1 d PD C 1 
H34A H 0.5760 -0.0151 0.5252 0.135 Uiso 0.669(7) 1 calc PR C 1 
H34B H 0.5261 0.0134 0.6237 0.135 Uiso 0.669(7) 1 calc PR C 1 
H34C H 0.6453 0.0417 0.6077 0.135 Uiso 0.669(7) 1 calc PR C 1 
C35 C 0.3778(7) 0.0406(6) 0.4298(10) 0.0900(17) Uiso 0.669(7) 1 d PD C 1 
H35A H 0.3926 -0.0006 0.3952 0.135 Uiso 0.669(7) 1 calc PR C 1 
H35B H 0.3258 0.0682 0.3711 0.135 Uiso 0.669(7) 1 calc PR C 1 
H35C H 0.3408 0.0312 0.4899 0.135 Uiso 0.669(7) 1 calc PR C 1 
C36 C 0.4665(11) 0.1436(4) 0.5316(11) 0.0900(17) Uiso 0.669(7) 1 d PD C 1 
H36A H 0.4277 0.1727 0.4682 0.135 Uiso 0.669(7) 1 calc PR C 1 
H36B H 0.5388 0.1642 0.5782 0.135 Uiso 0.669(7) 1 calc PR C 1 
H36C H 0.4143 0.1356 0.5789 0.135 Uiso 0.669(7) 1 calc PR C 1 
C34A C 0.6144(11) 0.0725(8) 0.5813(15) 0.0900(17) Uiso 0.331(7) 1 d PD C 2 
H34D H 0.6585 0.1133 0.5848 0.135 Uiso 0.331(7) 1 calc PR C 2 
H34E H 0.6608 0.0359 0.5663 0.135 Uiso 0.331(7) 1 calc PR C 2 
H34F H 0.5978 0.0655 0.6543 0.135 Uiso 0.331(7) 1 calc PR C 2 
C35A C 0.4404(15) 0.0095(5) 0.4962(18) 0.0900(17) Uiso 0.331(7) 1 d PD C 2 
H35D H 0.4936 -0.0258 0.4895 0.135 Uiso 0.331(7) 1 calc PR C 2 
H35E H 0.3659 0.0047 0.4361 0.135 Uiso 0.331(7) 1 calc PR C 2 
H35F H 0.4265 0.0072 0.5713 0.135 Uiso 0.331(7) 1 calc PR C 2 
C36A C 0.3903(10) 0.1242(8) 0.4729(18) 0.0900(17) Uiso 0.331(7) 1 d PD C 2 
H36D H 0.4156 0.1696 0.4697 0.135 Uiso 0.331(7) 1 calc PR C 2 
H36E H 0.3614 0.1184 0.5395 0.135 Uiso 0.331(7) 1 calc PR C 2 
H36F H 0.3276 0.1140 0.4031 0.135 Uiso 0.331(7) 1 calc PR C 2 
C40 C 0.5417(4) 0.0287(2) 0.0623(4) 0.0430(9) Uani 1 1 d . D . 
C43 C 0.4786(4) -0.0092(2) -0.0499(4) 0.0658(15) Uani 1 1 d D . . 
C44 C 0.4194(8) -0.0712(4) -0.0158(9) 0.0889(15) Uiso 0.829(7) 1 d PD D 1 
H44A H 0.4778 -0.0964 0.0417 0.133 Uiso 0.829(7) 1 calc PR D 1 
H44B H 0.3867 -0.0985 -0.0836 0.133 Uiso 0.829(7) 1 calc PR D 1 
H44C H 0.3565 -0.0576 0.0159 0.133 Uiso 0.829(7) 1 calc PR D 1 
C45 C 0.3922(7) 0.0361(4) -0.1387(7) 0.0889(15) Uiso 0.829(7) 1 d PD D 1 
H45A H 0.4345 0.0744 -0.1541 0.133 Uiso 0.829(7) 1 calc PR D 1 
H45B H 0.3292 0.0504 -0.1076 0.133 Uiso 0.829(7) 1 calc PR D 1 
H45C H 0.3586 0.0119 -0.2098 0.133 Uiso 0.829(7) 1 calc PR D 1 
C46 C 0.5722(7) -0.0327(5) -0.1083(8) 0.0889(15) Uiso 0.829(7) 1 d PD D 1 
H46A H 0.6102 0.0054 -0.1306 0.133 Uiso 0.829(7) 1 calc PR D 1 
H46B H 0.5338 -0.0586 -0.1763 0.133 Uiso 0.829(7) 1 calc PR D 1 
H46C H 0.6310 -0.0597 -0.0545 0.133 Uiso 0.829(7) 1 calc PR D 1 
C44A C 0.514(3) -0.0819(4) -0.063(4) 0.0889(15) Uiso 0.171(7) 1 d PD D 2 
H44D H 0.4645 -0.0996 -0.1357 0.133 Uiso 0.171(7) 1 calc PR D 2 
H44E H 0.5039 -0.1080 0.0003 0.133 Uiso 0.171(7) 1 calc PR D 2 
H44F H 0.5963 -0.0835 -0.0630 0.133 Uiso 0.171(7) 1 calc PR D 2 
C45A C 0.3430(8) -0.0049(18) -0.071(3) 0.0889(15) Uiso 0.171(7) 1 d PD D 2 
H45D H 0.3213 0.0402 -0.0592 0.133 Uiso 0.171(7) 1 calc PR D 2 
H45E H 0.3198 -0.0341 -0.0179 0.133 Uiso 0.171(7) 1 calc PR D 2 
H45F H 0.3030 -0.0182 -0.1499 0.133 Uiso 0.171(7) 1 calc PR D 2 
C46A C 0.500(3) 0.0218(15) -0.159(2) 0.0889(15) Uiso 0.171(7) 1 d PD D 2 
H46D H 0.4727 0.0673 -0.1668 0.133 Uiso 0.171(7) 1 calc PR D 2 
H46E H 0.4558 -0.0030 -0.2270 0.133 Uiso 0.171(7) 1 calc PR D 2 
H46F H 0.5832 0.0204 -0.1531 0.133 Uiso 0.171(7) 1 calc PR D 2 
C50 C 0.7244(4) 0.2177(2) 0.0210(3) 0.0362(8) Uani 1 1 d . E . 
C53 C 0.7327(4) 0.2354(2) -0.0986(4) 0.0512(11) Uani 1 1 d D . . 
C54 C 0.7889(11) 0.1738(4) -0.1378(12) 0.0929(17) Uiso 0.570(6) 1 d PD E 1 
H54A H 0.7368 0.1361 -0.1435 0.139 Uiso 0.570(6) 1 calc PR E 1 
H54B H 0.8645 0.1645 -0.0818 0.139 Uiso 0.570(6) 1 calc PR E 1 
H54C H 0.8007 0.1824 -0.2125 0.139 Uiso 0.570(6) 1 calc PR E 1 
C55 C 0.8199(9) 0.2933(5) -0.0932(13) 0.0929(17) Uiso 0.570(6) 1 d PD E 1 
H55A H 0.8968 0.2819 -0.0413 0.139 Uiso 0.570(6) 1 calc PR E 1 
H55B H 0.7904 0.3327 -0.0651 0.139 Uiso 0.570(6) 1 calc PR E 1 
H55C H 0.8273 0.3016 -0.1697 0.139 Uiso 0.570(6) 1 calc PR E 1 
C56 C 0.6125(7) 0.2538(6) -0.1859(10) 0.0929(17) Uiso 0.570(6) 1 d PD E 1 
H56A H 0.5574 0.2175 -0.1923 0.139 Uiso 0.570(6) 1 calc PR E 1 
H56B H 0.6237 0.2624 -0.2609 0.139 Uiso 0.570(6) 1 calc PR E 1 
H56C H 0.5811 0.2930 -0.1593 0.139 Uiso 0.570(6) 1 calc PR E 1 
C54A C 0.8593(8) 0.2360(7) -0.1116(17) 0.0929(17) Uiso 0.430(6) 1 d PD E 2 
H54D H 0.9106 0.2622 -0.0500 0.139 Uiso 0.430(6) 1 calc PR E 2 
H54E H 0.8573 0.2552 -0.1856 0.139 Uiso 0.430(6) 1 calc PR E 2 
H54F H 0.8890 0.1911 -0.1074 0.139 Uiso 0.430(6) 1 calc PR E 2 
C55A C 0.6937(12) 0.3083(3) -0.1244(17) 0.0929(17) Uiso 0.430(6) 1 d PD E 2 
H55D H 0.7440 0.3367 -0.0659 0.139 Uiso 0.430(6) 1 calc PR E 2 
H55E H 0.6122 0.3132 -0.1238 0.139 Uiso 0.430(6) 1 calc PR E 2 
H55F H 0.7004 0.3206 -0.1998 0.139 Uiso 0.430(6) 1 calc PR E 2 
C56A C 0.6573(12) 0.1887(6) -0.1930(12) 0.0929(17) Uiso 0.430(6) 1 d PD E 2 
H56D H 0.5773 0.1866 -0.1868 0.139 Uiso 0.430(6) 1 calc PR E 2 
H56E H 0.6917 0.1447 -0.1826 0.139 Uiso 0.430(6) 1 calc PR E 2 
H56F H 0.6555 0.2053 -0.2686 0.139 Uiso 0.430(6) 1 calc PR E 2 
C60 C 0.7166(3) 0.27240(19) 0.3389(3) 0.0328(7) Uani 1 1 d . . . 
C63 C 0.7051(4) 0.3234(2) 0.4311(4) 0.0403(9) Uani 1 1 d . . . 
C64 C 0.7648(6) 0.2940(3) 0.5508(6) 0.0710(15) Uiso 1 1 d . . . 
H64A H 0.7237 0.2539 0.5609 0.106 Uiso 1 1 calc R . . 
H64B H 0.7617 0.3257 0.6098 0.106 Uiso 1 1 calc R . . 
H64C H 0.8466 0.2837 0.5572 0.106 Uiso 1 1 calc R . . 
C65 C 0.7694(5) 0.3866(3) 0.4150(6) 0.0666(14) Uiso 1 1 d . . . 
H65A H 0.8510 0.3763 0.4205 0.100 Uiso 1 1 calc R . . 
H65B H 0.7671 0.4182 0.4747 0.100 Uiso 1 1 calc R . . 
H65C H 0.7309 0.4054 0.3397 0.100 Uiso 1 1 calc R . . 
C66 C 0.5738(6) 0.3375(4) 0.4221(6) 0.0736(16) Uiso 1 1 d . . . 
H66A H 0.5355 0.2968 0.4338 0.110 Uiso 1 1 calc R . . 
H66B H 0.5341 0.3551 0.3462 0.110 Uiso 1 1 calc R . . 
H66C H 0.5697 0.3694 0.4806 0.110 Uiso 1 1 calc R . . 
C102 C 1.1455(4) 0.2138(3) 0.2953(4) 0.0517(11) Uani 1 1 d . . . 
H10A H 1.1564 0.1684 0.3117 0.062 Uiso 1 1 calc R . . 
C103 C 1.2446(5) 0.2523(4) 0.2931(6) 0.0689(16) Uani 1 1 d . . . 
H10B H 1.3197 0.2328 0.3077 0.083 Uiso 1 1 calc R . . 
C104 C 1.2293(5) 0.3182(4) 0.2694(6) 0.0760(18) Uani 1 1 d . . . 
H10C H 1.2934 0.3446 0.2654 0.091 Uiso 1 1 calc R . . 
C105 C 1.1172(5) 0.3457(3) 0.2512(6) 0.0686(15) Uani 1 1 d . . . 
H10D H 1.1053 0.3913 0.2381 0.082 Uiso 1 1 calc R . . 
C106 C 1.0229(4) 0.3044(3) 0.2527(5) 0.0506(10) Uani 1 1 d . . . 
H10E H 0.9469 0.3228 0.2377 0.061 Uiso 1 1 calc R . . 
C202 C 0.6508(5) -0.1073(3) 0.3319(5) 0.0563(12) Uani 1 1 d . . . 
H20A H 0.5771 -0.0870 0.2993 0.068 Uiso 1 1 calc R . . 
C203 C 0.6530(6) -0.1731(3) 0.3690(6) 0.0674(15) Uani 1 1 d . . . 
H20B H 0.5822 -0.1960 0.3625 0.081 Uiso 1 1 calc R . . 
C204 C 0.7608(6) -0.2035(3) 0.4151(6) 0.0705(16) Uani 1 1 d . . . 
H20C H 0.7639 -0.2478 0.4389 0.085 Uiso 1 1 calc R . . 
C205 C 0.8649(6) -0.1687(3) 0.4266(6) 0.0642(14) Uani 1 1 d . . . 
H20D H 0.9391 -0.1886 0.4583 0.077 Uiso 1 1 calc R . . 
C206 C 0.8551(4) -0.1024(3) 0.3889(4) 0.0506(11) Uani 1 1 d . . . 
H20E H 0.9249 -0.0782 0.3972 0.061 Uiso 1 1 calc R . . 
C302 C 0.3977(4) 0.2729(3) 0.0329(5) 0.0571(12) Uani 1 1 d . . . 
H30A H 0.4679 0.2977 0.0496 0.069 Uiso 1 1 calc R . . 
C303 C 0.2942(5) 0.3010(3) -0.0432(6) 0.0719(16) Uani 1 1 d . . . 
H30B H 0.2963 0.3420 -0.0789 0.086 Uiso 1 1 calc R . . 
C304 C 0.1909(6) 0.2659(3) -0.0624(7) 0.080(2) Uani 1 1 d . . . 
H30C H 0.1201 0.2833 -0.1109 0.096 Uiso 1 1 calc R . . 
C305 C 0.1912(5) 0.2053(3) -0.0107(8) 0.088(2) Uani 1 1 d . . . 
H30D H 0.1208 0.1811 -0.0227 0.106 Uiso 1 1 calc R . . 
C306 C 0.2984(4) 0.1803(3) 0.0601(6) 0.0643(14) Uani 1 1 d . . . 
H30E H 0.2984 0.1384 0.0937 0.077 Uiso 1 1 calc R . . 
 
loop_ 
 _atom_site_aniso_label 
 _atom_site_aniso_U_11 
 _atom_site_aniso_U_22 
 _atom_site_aniso_U_33 
 _atom_site_aniso_U_23 
 _atom_site_aniso_U_13 
 _atom_site_aniso_U_12 
Fe1 0.0447(3) 0.0312(3) 0.0294(2) 0.0021(2) 0.0116(2) 0.0039(2) 
Fe2 0.0400(3) 0.0313(3) 0.0326(2) 0.0016(2) 0.0090(2) -0.0011(2) 
Fe3 0.0460(3) 0.0330(3) 0.0316(2) -0.0013(2) 0.0120(2) -0.0050(2) 
O1 0.0297(12) 0.0301(12) 0.0322(12) 0.0018(10) 0.0081(10) -0.0010(9) 
O11 0.0474(17) 0.0477(17) 0.0430(16) 0.0151(13) 0.0031(13) -0.0077(13) 
O12 0.0558(17) 0.0416(16) 0.0353(14) 0.0053(12) 0.0017(12) -0.0076(13) 
O22 0.0564(18) 0.0364(15) 0.065(2) 0.0040(14) 0.0315(16) 0.0065(13) 
O21 0.0509(17) 0.0369(16) 0.070(2) -0.0076(15) 0.0284(16) -0.0062(13) 
O31 0.0536(16) 0.0394(15) 0.0544(17) 0.0065(14) 0.0261(14) -0.0017(14) 
O32 0.0526(18) 0.0468(17) 0.0543(18) 0.0169(15) 0.0227(15) 0.0059(13) 
O41 0.0530(17) 0.0345(15) 0.0428(16) -0.0051(12) 0.0000(13) 0.0014(12) 
O42 0.0504(17) 0.0422(16) 0.0548(19) -0.0121(14) -0.0036(15) 0.0070(14) 
O51 0.0377(15) 0.076(2) 0.0397(15) 0.0120(15) 0.0135(12) 0.0009(14) 
O52 0.0415(15) 0.0572(19) 0.0366(14) 0.0129(14) 0.0037(12) -0.0107(13) 
O61 0.0424(16) 0.0413(16) 0.0544(18) -0.0109(14) 0.0019(14) 0.0004(12) 
O62 0.0383(15) 0.0437(16) 0.0587(19) -0.0141(14) 0.0183(14) -0.0034(12) 
N101 0.0414(18) 0.0400(18) 0.0392(17) -0.0005(14) 0.0095(14) -0.0009(14) 
N201 0.0474(19) 0.0355(17) 0.0425(19) 0.0022(15) 0.0088(15) -0.0035(14) 
N301 0.0422(18) 0.0395(18) 0.050(2) -0.0042(16) 0.0163(15) -0.0018(14) 
C10 0.0371(18) 0.0358(19) 0.0352(19) 0.0020(15) 0.0118(15) 0.0050(15) 
C13 0.047(2) 0.047(2) 0.035(2) 0.0077(18) -0.0011(17) 0.0016(18) 
C20 0.0422(19) 0.0372(19) 0.0370(18) -0.0032(17) 0.0090(15) 0.0016(17) 
C23 0.068(3) 0.055(3) 0.087(4) -0.005(3) 0.045(3) -0.002(2) 
C30 0.0332(18) 0.042(2) 0.039(2) 0.0034(17) 0.0117(15) -0.0060(16) 
C33 0.067(3) 0.063(3) 0.064(3) 0.016(3) 0.039(3) 0.005(2) 
C40 0.041(2) 0.040(2) 0.042(2) -0.0035(18) 0.0023(16) 0.0030(17) 
C43 0.073(3) 0.051(3) 0.056(3) -0.018(2) -0.009(3) 0.006(2) 
C50 0.0401(19) 0.0385(19) 0.0297(17) 0.0053(15) 0.0096(15) 0.0046(15) 
C53 0.049(2) 0.072(3) 0.033(2) 0.010(2) 0.0115(18) 0.004(2) 
C60 0.0397(19) 0.0294(17) 0.0300(17) 0.0009(13) 0.0113(14) -0.0034(14) 
C63 0.049(2) 0.0334(19) 0.041(2) -0.0072(16) 0.0170(17) 0.0024(16) 
C102 0.044(2) 0.055(3) 0.053(3) -0.002(2) 0.0087(19) 0.0046(19) 
C103 0.042(3) 0.090(4) 0.074(4) -0.006(3) 0.015(2) -0.005(3) 
C104 0.053(3) 0.083(4) 0.088(4) 0.006(4) 0.014(3) -0.019(3) 
C105 0.069(3) 0.059(3) 0.075(4) 0.006(3) 0.017(3) -0.023(3) 
C106 0.049(2) 0.043(2) 0.061(3) 0.005(2) 0.017(2) -0.0008(19) 
C202 0.059(3) 0.042(2) 0.066(3) 0.005(2) 0.014(2) -0.011(2) 
C203 0.080(4) 0.042(3) 0.081(4) 0.009(3) 0.024(3) -0.018(3) 
C204 0.108(5) 0.038(2) 0.072(4) 0.009(2) 0.036(3) -0.004(3) 
C205 0.070(3) 0.044(3) 0.078(4) 0.011(3) 0.021(3) 0.010(2) 
C206 0.051(2) 0.044(2) 0.053(3) 0.005(2) 0.011(2) 0.0035(19) 
C302 0.046(2) 0.048(3) 0.077(4) 0.009(2) 0.018(2) 0.002(2) 
C303 0.062(3) 0.066(3) 0.081(4) 0.010(3) 0.010(3) 0.015(3) 
C304 0.058(3) 0.066(4) 0.099(5) 0.003(3) -0.006(3) 0.015(3) 
C305 0.045(3) 0.064(4) 0.138(7) -0.006(4) -0.002(3) -0.007(3) 
C306 0.047(2) 0.050(3) 0.091(4) 0.000(3) 0.014(2) -0.002(2) 
 
_geom_special_details 
; 
 All esds (except the esd in the dihedral angle between two l.s. planes) 
 are estimated using the full covariance matrix.  The cell esds are taken 
 into account individually in the estimation of esds in distances, angles 
 and torsion angles; correlations between esds in cell parameters are only 
 used when they are defined by crystal symmetry.  An approximate (isotropic) 
 treatment of cell esds is used for estimating esds involving l.s. planes. 
; 
 
loop_ 
 _geom_bond_atom_site_label_1 
 _geom_bond_atom_site_label_2 
 _geom_bond_distance 
 _geom_bond_site_symmetry_2 
 _geom_bond_publ_flag 
Fe1 O1 1.893(3) . ? 
Fe1 O52 2.017(3) . ? 
Fe1 O11 2.049(3) . ? 
Fe1 O62 2.062(3) . ? 
Fe1 O21 2.099(3) . ? 
Fe1 N101 2.257(4) . ? 
Fe1 Fe2 3.2610(8) . ? 
Fe1 Fe3 3.3503(8) . ? 
Fe2 O1 1.844(3) . ? 
Fe2 O31 2.009(3) . ? 
Fe2 O22 2.023(3) . ? 
Fe2 O41 2.042(3) . ? 
Fe2 O12 2.049(3) . ? 
Fe2 N201 2.247(4) . ? 
Fe2 Fe3 3.3016(8) . ? 
Fe3 O1 1.987(3) . ? 
Fe3 O61 2.056(3) . ? 
Fe3 O42 2.057(3) . ? 
Fe3 O51 2.083(3) . ? 
Fe3 O32 2.123(3) . ? 
Fe3 N301 2.212(4) . ? 
O11 C10 1.252(5) . ? 
O12 C10 1.259(5) . ? 
O22 C20 1.248(5) . ? 
O21 C20 1.250(5) . ? 
O31 C30 1.253(5) . ? 
O32 C30 1.246(5) . ? 
O41 C40 1.261(5) . ? 
O42 C40 1.235(5) . ? 
O51 C50 1.247(5) . ? 
O52 C50 1.261(5) . ? 
O61 C60 1.254(5) . ? 
O62 C60 1.241(5) . ? 
N101 C102 1.317(6) . ? 
N101 C106 1.339(6) . ? 
N201 C202 1.338(6) . ? 
N201 C206 1.344(6) . ? 
N301 C302 1.326(6) . ? 
N301 C306 1.337(6) . ? 
C10 C13 1.515(5) . ? 
C13 C15 1.5336(10) . ? 
C13 C16 1.5334(10) . ? 
C13 C14A 1.5337(10) . ? 
C13 C16A 1.5339(11) . ? 
C13 C14 1.5338(10) . ? 
C13 C15A 1.5340(11) . ? 
C20 C23 1.522(6) . ? 
C23 C25 1.5339(10) . ? 
C23 C25A 1.5335(10) . ? 
C23 C24A 1.5339(10) . ? 
C23 C26 1.5339(10) . ? 
C23 C24 1.5339(10) . ? 
C23 C26A 1.5341(10) . ? 
C30 C33 1.537(6) . ? 
C33 C35A 1.5338(10) . ? 
C33 C34 1.5336(10) . ? 
C33 C36 1.5344(11) . ? 
C33 C36A 1.5352(12) . ? 
C33 C35 1.5346(10) . ? 
C33 C34A 1.5344(10) . ? 
C40 C43 1.533(6) . ? 
C43 C46A 1.5340(10) . ? 
C43 C45 1.5338(10) . ? 
C43 C44 1.5336(10) . ? 
C43 C46 1.5342(10) . ? 
C43 C44A 1.5338(10) . ? 
C43 C45A 1.5341(10) . ? 
C45A C46A 2.42(2) . ? 
C50 C53 1.505(6) . ? 
C53 C56 1.5334(10) . ? 
C53 C55 1.5336(10) . ? 
C53 C56A 1.5334(10) . ? 
C53 C54A 1.5335(10) . ? 
C53 C54 1.5334(10) . ? 
C53 C55A 1.5340(10) . ? 
C60 C63 1.538(5) . ? 
C63 C65 1.513(7) . ? 
C63 C64 1.519(7) . ? 
C63 C66 1.534(8) . ? 
C102 C103 1.398(8) . ? 
C103 C104 1.351(10) . ? 
C104 C105 1.380(9) . ? 
C105 C106 1.382(7) . ? 
C202 C203 1.387(7) . ? 
C203 C204 1.364(9) . ? 
C204 C205 1.374(9) . ? 
C205 C206 1.395(7) . ? 
C302 C303 1.403(7) . ? 
C303 C304 1.357(9) . ? 
C304 C305 1.363(10) . ? 
C305 C306 1.387(8) . ? 
 
loop_ 
 _geom_angle_atom_site_label_1 
 _geom_angle_atom_site_label_2 
 _geom_angle_atom_site_label_3 
 _geom_angle 
 _geom_angle_site_symmetry_1 
 _geom_angle_site_symmetry_3 
 _geom_angle_publ_flag 
O1 Fe1 O52 95.78(11) . . ? 
O1 Fe1 O11 96.67(12) . . ? 
O52 Fe1 O11 167.23(13) . . ? 
O1 Fe1 O62 94.48(12) . . ? 
O52 Fe1 O62 93.56(14) . . ? 
O11 Fe1 O62 88.28(14) . . ? 
O1 Fe1 O21 94.57(12) . . ? 
O52 Fe1 O21 87.83(15) . . ? 
O11 Fe1 O21 88.37(15) . . ? 
O62 Fe1 O21 170.65(12) . . ? 
O1 Fe1 N101 177.05(13) . . ? 
O52 Fe1 N101 81.30(12) . . ? 
O11 Fe1 N101 86.26(13) . . ? 
O62 Fe1 N101 85.31(13) . . ? 
O21 Fe1 N101 85.77(13) . . ? 
O1 Fe1 Fe2 28.80(8) . . ? 
O52 Fe1 Fe2 115.87(9) . . ? 
O11 Fe1 Fe2 74.84(9) . . ? 
O62 Fe1 Fe2 111.92(9) . . ? 
O21 Fe1 Fe2 75.54(9) . . ? 
N101 Fe1 Fe2 153.56(9) . . ? 
O1 Fe1 Fe3 31.10(8) . . ? 
O52 Fe1 Fe3 73.28(9) . . ? 
O11 Fe1 Fe3 119.33(9) . . ? 
O62 Fe1 Fe3 75.00(8) . . ? 
O21 Fe1 Fe3 114.20(9) . . ? 
N101 Fe1 Fe3 146.45(9) . . ? 
Fe2 Fe1 Fe3 59.900(17) . . ? 
O1 Fe2 O31 96.08(12) . . ? 
O1 Fe2 O22 97.06(12) . . ? 
O31 Fe2 O22 166.85(13) . . ? 
O1 Fe2 O41 97.65(12) . . ? 
O31 Fe2 O41 91.32(14) . . ? 
O22 Fe2 O41 87.24(15) . . ? 
O1 Fe2 O12 95.24(12) . . ? 
O31 Fe2 O12 89.95(14) . . ? 
O22 Fe2 O12 88.54(14) . . ? 
O41 Fe2 O12 166.84(12) . . ? 
O1 Fe2 N201 178.26(13) . . ? 
O31 Fe2 N201 83.37(14) . . ? 
O22 Fe2 N201 83.48(13) . . ? 
O41 Fe2 N201 84.02(13) . . ? 
O12 Fe2 N201 83.11(13) . . ? 
O1 Fe2 Fe1 29.64(8) . . ? 
O31 Fe2 Fe1 117.43(10) . . ? 
O22 Fe2 Fe1 74.77(9) . . ? 
O41 Fe2 Fe1 115.21(9) . . ? 
O12 Fe2 Fe1 75.53(9) . . ? 
N201 Fe2 Fe1 149.64(10) . . ? 
O1 Fe2 Fe3 31.75(8) . . ? 
O31 Fe2 Fe3 72.46(9) . . ? 
O22 Fe2 Fe3 119.81(9) . . ? 
O41 Fe2 Fe3 77.41(9) . . ? 
O12 Fe2 Fe3 115.40(9) . . ? 
N201 Fe2 Fe3 148.89(10) . . ? 
Fe1 Fe2 Fe3 61.393(18) . . ? 
O1 Fe3 O61 94.71(11) . . ? 
O1 Fe3 O42 93.79(12) . . ? 
O61 Fe3 O42 171.30(13) . . ? 
O1 Fe3 O51 91.68(12) . . ? 
O61 Fe3 O51 92.92(15) . . ? 
O42 Fe3 O51 88.73(15) . . ? 
O1 Fe3 O32 93.49(12) . . ? 
O61 Fe3 O32 86.46(14) . . ? 
O42 Fe3 O32 91.12(15) . . ? 
O51 Fe3 O32 174.83(13) . . ? 
O1 Fe3 N301 174.67(13) . . ? 
O61 Fe3 N301 87.97(13) . . ? 
O42 Fe3 N301 83.73(13) . . ? 
O51 Fe3 N301 83.56(13) . . ? 
O32 Fe3 N301 91.28(13) . . ? 
O1 Fe3 Fe2 29.23(7) . . ? 
O61 Fe3 Fe2 116.22(9) . . ? 
O42 Fe3 Fe2 71.13(9) . . ? 
O51 Fe3 Fe2 108.80(10) . . ? 
O32 Fe3 Fe2 76.01(9) . . ? 
N301 Fe3 Fe2 151.30(10) . . ? 
O1 Fe3 Fe1 29.47(7) . . ? 
O61 Fe3 Fe1 72.49(9) . . ? 
O42 Fe3 Fe1 116.14(10) . . ? 
O51 Fe3 Fe1 74.09(8) . . ? 
O32 Fe3 Fe1 110.54(9) . . ? 
N301 Fe3 Fe1 149.13(10) . . ? 
Fe2 Fe3 Fe1 58.707(17) . . ? 
Fe2 O1 Fe1 121.56(13) . . ? 
Fe2 O1 Fe3 119.01(13) . . ? 
Fe1 O1 Fe3 119.43(13) . . ? 
C10 O11 Fe1 131.7(3) . . ? 
C10 O12 Fe2 131.0(3) . . ? 
C20 O22 Fe2 133.2(3) . . ? 
C20 O21 Fe1 129.0(3) . . ? 
C30 O31 Fe2 134.0(3) . . ? 
C30 O32 Fe3 126.2(3) . . ? 
C40 O41 Fe2 127.1(3) . . ? 
C40 O42 Fe3 134.3(3) . . ? 
C50 O51 Fe3 130.6(3) . . ? 
C50 O52 Fe1 132.9(3) . . ? 
C60 O61 Fe3 131.0(3) . . ? 
C60 O62 Fe1 129.8(3) . . ? 
C102 N101 C106 118.1(4) . . ? 
C102 N101 Fe1 122.8(3) . . ? 
C106 N101 Fe1 118.9(3) . . ? 
C202 N201 C206 117.1(4) . . ? 
C202 N201 Fe2 121.2(3) . . ? 
C206 N201 Fe2 121.7(3) . . ? 
C302 N301 C306 116.3(4) . . ? 
C302 N301 Fe3 120.5(3) . . ? 
C306 N301 Fe3 122.5(3) . . ? 
O11 C10 O12 125.2(4) . . ? 
O11 C10 C13 116.8(4) . . ? 
O12 C10 C13 118.0(3) . . ? 
C10 C13 C15 108.2(5) . . ? 
C10 C13 C16 112.6(5) . . ? 
C15 C13 C16 110.8(6) . . ? 
C10 C13 C14A 112.3(13) . . ? 
C15 C13 C14A 139.0(13) . . ? 
C16 C13 C14A 46.2(8) . . ? 
C10 C13 C16A 105.9(12) . . ? 
C15 C13 C16A 52.7(8) . . ? 
C16 C13 C16A 63.7(4) . . ? 
C14A C13 C16A 108.2(10) . . ? 
C10 C13 C14 107.8(5) . . ? 
C15 C13 C14 109.8(6) . . ? 
C16 C13 C14 107.6(6) . . ? 
C14A C13 C14 63.8(4) . . ? 
C16A C13 C14 145.8(13) . . ? 
C10 C13 C15A 116.7(13) . . ? 
C15 C13 C15A 63.1(4) . . ? 
C16 C13 C15A 129.5(13) . . ? 
C14A C13 C15A 103.0(12) . . ? 
C16A C13 C15A 110.6(12) . . ? 
C14 C13 C15A 47.1(7) . . ? 
O22 C20 O21 125.6(4) . . ? 
O22 C20 C23 115.8(4) . . ? 
O21 C20 C23 118.6(4) . . ? 
C20 C23 C25 109.8(9) . . ? 
C20 C23 C25A 114.1(7) . . ? 
C25 C23 C25A 49.9(4) . . ? 
C20 C23 C24A 110.1(7) . . ? 
C25 C23 C24A 66.6(9) . . ? 
C25A C23 C24A 110.9(9) . . ? 
C20 C23 C26 109.8(10) . . ? 
C25 C23 C26 106.6(9) . . ? 
C25A C23 C26 58.0(8) . . ? 
C24A C23 C26 139.3(11) . . ? 
C20 C23 C24 112.3(9) . . ? 
C25 C23 C24 111.4(11) . . ? 
C25A C23 C24 133.6(11) . . ? 
C24A C23 C24 49.3(4) . . ? 
C26 C23 C24 106.8(10) . . ? 
C20 C23 C26A 107.7(7) . . ? 
C25 C23 C26A 141.4(11) . . ? 
C25A C23 C26A 105.5(8) . . ? 
C24A C23 C26A 108.3(8) . . ? 
C26 C23 C26A 50.8(4) . . ? 
C24 C23 C26A 60.6(8) . . ? 
O32 C30 O31 125.5(4) . . ? 
O32 C30 C33 118.4(4) . . ? 
O31 C30 C33 116.1(4) . . ? 
C35A C33 C34 59.2(7) . . ? 
C35A C33 C36 125.1(10) . . ? 
C34 C33 C36 119.0(7) . . ? 
C35A C33 C36A 100.9(11) . . ? 
C34 C33 C36A 138.2(10) . . ? 
C36 C33 C36A 39.5(4) . . ? 
C35A C33 C35 42.1(4) . . ? 
C34 C33 C35 101.4(7) . . ? 
C36 C33 C35 107.0(7) . . ? 
C36A C33 C35 69.3(8) . . ? 
C35A C33 C34A 100.6(8) . . ? 
C34 C33 C34A 41.9(4) . . ? 
C36 C33 C34A 90.8(9) . . ? 
C36A C33 C34A 128.5(11) . . ? 
C35 C33 C34A 142.4(8) . . ? 
C35A C33 C30 116.5(10) . . ? 
C34 C33 C30 112.6(6) . . ? 
C36 C33 C30 113.2(6) . . ? 
C36A C33 C30 109.2(9) . . ? 
C35 C33 C30 101.1(6) . . ? 
C34A C33 C30 101.8(9) . . ? 
O42 C40 O41 125.8(4) . . ? 
O42 C40 C43 118.4(4) . . ? 
O41 C40 C43 115.8(4) . . ? 
C40 C43 C46A 113.2(18) . . ? 
C40 C43 C45 111.5(5) . . ? 
C46A C43 C45 53.5(8) . . ? 
C40 C43 C44 107.9(5) . . ? 
C46A C43 C44 138.8(18) . . ? 
C45 C43 C44 113.9(6) . . ? 
C40 C43 C46 109.1(5) . . ? 
C46A C43 C46 54.7(4) . . ? 
C45 C43 C46 106.2(6) . . ? 
C44 C43 C46 108.1(6) . . ? 
C40 C43 C44A 119.1(18) . . ? 
C46A C43 C44A 100.3(16) . . ? 
C45 C43 C44A 129.2(18) . . ? 
C44 C43 C44A 54.4(4) . . ? 
C46 C43 C44A 53.9(7) . . ? 
C40 C43 C45A 109.2(18) . . ? 
C46A C43 C45A 104.4(14) . . ? 
C45 C43 C45A 53.8(4) . . ? 
C44 C43 C45A 64.2(10) . . ? 
C46 C43 C45A 141.4(18) . . ? 
C44A C43 C45A 109.5(19) . . ? 
C43 C45A C46A 37.8(7) . . ? 
C43 C46A C45A 37.8(7) . . ? 
O51 C50 O52 125.3(4) . . ? 
O51 C50 C53 117.8(3) . . ? 
O52 C50 C53 116.9(4) . . ? 
C50 C53 C56 113.9(6) . . ? 
C50 C53 C55 111.3(6) . . ? 
C56 C53 C55 108.3(7) . . ? 
C50 C53 C56A 112.1(8) . . ? 
C56 C53 C56A 55.0(4) . . ? 
C55 C53 C56A 136.5(10) . . ? 
C50 C53 C54A 115.5(8) . . ? 
C56 C53 C54A 130.5(10) . . ? 
C55 C53 C54A 49.3(7) . . ? 
C56A C53 C54A 107.2(9) . . ? 
C50 C53 C54 104.7(6) . . ? 
C56 C53 C54 112.0(7) . . ? 
C55 C53 C54 106.3(7) . . ? 
C56A C53 C54 59.3(7) . . ? 
C54A C53 C54 57.5(4) . . ? 
C50 C53 C55A 108.6(8) . . ? 
C56 C53 C55A 58.2(8) . . ? 
C55 C53 C55A 56.2(4) . . ? 
C56A C53 C55A 111.0(9) . . ? 
C54A C53 C55A 102.2(8) . . ? 
C54 C53 C55A 146.3(9) . . ? 
O62 C60 O61 126.3(4) . . ? 
O62 C60 C63 116.4(3) . . ? 
O61 C60 C63 117.3(4) . . ? 
C65 C63 C64 109.6(4) . . ? 
C65 C63 C66 111.2(4) . . ? 
C64 C63 C66 108.3(4) . . ? 
C65 C63 C60 108.2(4) . . ? 
C64 C63 C60 107.9(4) . . ? 
C66 C63 C60 111.5(4) . . ? 
N101 C102 C103 122.8(5) . . ? 
C104 C103 C102 118.9(5) . . ? 
C103 C104 C105 118.9(5) . . ? 
C106 C105 C104 119.0(6) . . ? 
N101 C106 C105 122.2(5) . . ? 
N201 C202 C203 122.9(5) . . ? 
C204 C203 C202 118.8(5) . . ? 
C203 C204 C205 120.1(5) . . ? 
C204 C205 C206 117.5(5) . . ? 
N201 C206 C205 123.4(5) . . ? 
N301 C302 C303 124.2(5) . . ? 
C304 C303 C302 117.4(6) . . ? 
C305 C304 C303 119.9(6) . . ? 
C304 C305 C306 118.8(6) . . ? 
N301 C306 C305 123.2(6) . . ? 
 
_diffrn_measured_fraction_theta_max    0.897 
_diffrn_reflns_theta_full              29.34 
_diffrn_measured_fraction_theta_full   0.897 
_refine_diff_density_max    1.019 
_refine_diff_density_min   -0.512 
_refine_diff_density_rms    0.069 
#===END
 
data_fe240m 
 
_audit_creation_method            SHELXL-97 
_chemical_name_systematic 
; 
 ? 
; 
_chemical_name_common             ? 
_chemical_melting_point           ? 
_chemical_formula_moiety          ? 
_chemical_formula_sum 
 'C45 H69 Fe3 N3 O13' 
_chemical_formula_weight          1027.58 
 
loop_ 
 _atom_type_symbol 
 _atom_type_description 
 _atom_type_scat_dispersion_real 
 _atom_type_scat_dispersion_imag 
 _atom_type_scat_source 
 'C'  'C'   0.0033   0.0016 
 'International Tables Vol C Tables 4.2.6.8 and 6.1.1.4' 
 'H'  'H'   0.0000   0.0000 
 'International Tables Vol C Tables 4.2.6.8 and 6.1.1.4' 
 'N'  'N'   0.0061   0.0033 
 'International Tables Vol C Tables 4.2.6.8 and 6.1.1.4' 
 'O'  'O'   0.0106   0.0060 
 'International Tables Vol C Tables 4.2.6.8 and 6.1.1.4' 
 'Fe'  'Fe'   0.3463   0.8444 
 'International Tables Vol C Tables 4.2.6.8 and 6.1.1.4' 
 
_symmetry_cell_setting            monoclinic 
_symmetry_space_group_name_H-M    P2(1)
 
loop_ 
 _symmetry_equiv_pos_as_xyz 
 'x, y, z' 
 '-x, y+1/2, -z' 
 
_cell_length_a                    11.7650(10) 
_cell_length_b                    20.159(2) 
_cell_length_c                    12.0140(10) 
_cell_angle_alpha                 90.00 
_cell_angle_beta                  106.880(2) 
_cell_angle_gamma                 90.00 
_cell_volume                      2726.6(4) 
_cell_formula_units_Z             2 
_cell_measurement_temperature     240(2) 
_cell_measurement_reflns_used     718 
_cell_measurement_theta_min       14.90
_cell_measurement_theta_max       21.13
 
_exptl_crystal_description       'irregular block' 
_exptl_crystal_colour             'red brown'
_exptl_crystal_size_max           0.38
_exptl_crystal_size_mid           0.31
_exptl_crystal_size_min           0.24
_exptl_crystal_density_meas       ? 
_exptl_crystal_density_diffrn     1.252 
_exptl_crystal_density_method     'not measured' 
_exptl_crystal_F_000              1084 
_exptl_absorpt_coefficient_mu     0.844 
_exptl_absorpt_correction_type    empirical 
_exptl_absorpt_correction_T_min   0.479
_exptl_absorpt_correction_T_max   0.533
_exptl_absorpt_process_details    'XPREP'
 
_exptl_special_details 
; 
 ? 
; 
 
_diffrn_ambient_temperature       240(2) 
_diffrn_radiation_wavelength      0.71073 
_diffrn_radiation_type            MoK\a 
_diffrn_radiation_source          'fine-focus sealed tube' 
_diffrn_radiation_monochromator   graphite 
_diffrn_measurement_device_type   'Bruker SMART CCD' 
_diffrn_measurement_method        'narrow /w-scans'
_diffrn_detector_area_resol_mean  ?
_diffrn_standards_number          ? 
_diffrn_standards_interval_count  ? 
_diffrn_standards_interval_time   ? 
_diffrn_standards_decay_%         ? 
_diffrn_reflns_number             34305 
_diffrn_reflns_av_R_equivalents   0.0556 
_diffrn_reflns_av_sigmaI/netI     0.0892 
_diffrn_reflns_limit_h_min        -16 
_diffrn_reflns_limit_h_max        15 
_diffrn_reflns_limit_k_min        -28 
_diffrn_reflns_limit_k_max        28 
_diffrn_reflns_limit_l_min        -17 
_diffrn_reflns_limit_l_max        16 
_diffrn_reflns_theta_min          1.77 
_diffrn_reflns_theta_max          30.45 
_reflns_number_total              14891 
_reflns_number_gt                 8283 
_reflns_threshold_expression      >2sigma(I) 
 
_computing_data_collection       'Bruker SMART'
_computing_cell_refinement        'Bruker SMART'
_computing_data_reduction         'Bruker SAINT'
_computing_structure_solution     'SHELXS-97 (Sheldrick, 1990)' 
_computing_structure_refinement   'SHELXL-97 (Sheldrick, 1997)' 
_computing_molecular_graphics     ? 
_computing_publication_material   ? 
 
_refine_special_details 
; 
 Refinement of F^2^ against ALL reflections.  The weighted R-factor wR and 
 goodness of fit S are based on F^2^, conventional R-factors R are based 
 on F, with F set to zero for negative F^2^. The threshold expression of 
 F^2^ > 2sigma(F^2^) is used only for calculating R-factors(gt) etc. and is 
 not relevant to the choice of reflections for refinement.  R-factors based 
 on F^2^ are statistically about twice as large as those based on F, and R- 
 factors based on ALL data will be even larger. 
; 
 
_refine_ls_structure_factor_coef  Fsqd  
_refine_ls_matrix_type            full 
_refine_ls_weighting_scheme       calc  
_refine_ls_weighting_details 
 'calc w=1/[\s^2^(Fo^2^)+(0.0400P)^2^+0.0000P] where P=(Fo^2^+2Fc^2^)/3' 
_atom_sites_solution_primary      direct 
_atom_sites_solution_secondary    difmap 
_atom_sites_solution_hydrogens    geom 
_refine_ls_hydrogen_treatment     noref 
_refine_ls_extinction_method      none 
_refine_ls_extinction_coef        ? 
_refine_ls_abs_structure_details 
 'Flack H D (1983), Acta Cryst. A39, 876-881' 
_refine_ls_abs_structure_Flack    -0.007(15) 
_refine_ls_number_reflns          14891 
_refine_ls_number_parameters      527 
_refine_ls_number_restraints      31 
_refine_ls_R_factor_all           0.1294 
_refine_ls_R_factor_gt            0.0579 
_refine_ls_wR_factor_ref          0.1205 
_refine_ls_wR_factor_gt           0.1061 
_refine_ls_goodness_of_fit_ref    1.166 
_refine_ls_restrained_S_all       1.165 
_refine_ls_shift/su_max           0.032 
_refine_ls_shift/su_mean          0.001 
 
loop_ 
 _atom_site_label 
 _atom_site_type_symbol 
 _atom_site_fract_x 
 _atom_site_fract_y 
 _atom_site_fract_z 
 _atom_site_U_iso_or_equiv 
 _atom_site_adp_type 
 _atom_site_occupancy 
 _atom_site_symmetry_multiplicity 
 _atom_site_calc_flag 
 _atom_site_refinement_flags 
 _atom_site_disorder_assembly 
 _atom_site_disorder_group 
Fe1 Fe 0.87423(5) 0.17428(7) 0.26077(5) 0.04452(15) Uani 1 1 d . . . 
Fe2 Fe 0.74036(5) 0.03470(7) 0.28224(5) 0.04475(15) Uani 1 1 d . . . 
Fe3 Fe 0.57672(5) 0.16571(7) 0.17401(5) 0.04585(15) Uani 1 1 d . . . 
O1 O 0.7325(2) 0.12333(14) 0.2410(2) 0.0410(6) Uani 1 1 d . . . 
O11 O 0.9645(3) 0.13727(16) 0.4214(3) 0.0590(8) Uani 1 1 d . . . 
O12 O 0.8609(3) 0.04770(15) 0.4427(2) 0.0586(8) Uani 1 1 d . . . 
O22 O 0.8755(3) 0.00927(15) 0.2195(3) 0.0612(8) Uani 1 1 d . . . 
O21 O 0.9580(3) 0.10280(16) 0.1850(3) 0.0642(9) Uani 1 1 d . . . 
O31 O 0.6072(3) 0.03868(16) 0.3553(3) 0.0579(7) Uani 1 1 d . . . 
O32 O 0.5102(3) 0.13416(16) 0.3111(3) 0.0609(8) Uani 1 1 d . . . 
O41 O 0.6283(3) -0.00072(15) 0.1305(3) 0.0588(8) Uani 1 1 d . . . 
O42 O 0.5036(3) 0.08394(17) 0.0758(3) 0.0662(9) Uani 1 1 d . . . 
O51 O 0.6252(3) 0.20201(17) 0.0322(3) 0.0622(9) Uani 1 1 d . . . 
O52 O 0.8199(3) 0.21968(16) 0.1034(2) 0.0580(8) Uani 1 1 d . . . 
O61 O 0.6223(3) 0.25275(15) 0.2654(3) 0.0588(8) Uani 1 1 d . . . 
O62 O 0.8174(3) 0.25106(15) 0.3449(3) 0.0562(8) Uani 1 1 d . . . 
N101 N 1.0352(3) 0.23785(19) 0.2765(3) 0.0514(9) Uani 1 1 d . . . 
N201 N 0.7490(3) -0.07269(19) 0.3373(3) 0.0552(9) Uani 1 1 d . . . 
N301 N 0.4027(3) 0.21207(19) 0.0838(3) 0.0540(9) Uani 1 1 d . . . 
C10 C 0.9419(4) 0.0903(2) 0.4803(4) 0.0477(10) Uani 1 1 d . A . 
C13 C 1.0167(3) 0.08471(17) 0.6054(3) 0.0549(11) Uani 1 1 d D . . 
C14 C 1.1470(4) 0.0835(5) 0.6050(9) 0.0979(16) Uiso 0.653(6) 1 d PD A 1 
H14A H 1.1606 0.0452 0.5631 0.147 Uiso 0.653(6) 1 calc PR A 1 
H14B H 1.1976 0.0816 0.6836 0.147 Uiso 0.653(6) 1 calc PR A 1 
H14C H 1.1642 0.1229 0.5681 0.147 Uiso 0.653(6) 1 calc PR A 1 
C15 C 1.0057(9) 0.1484(3) 0.6711(8) 0.0979(16) Uiso 0.653(6) 1 d PD A 1 
H15A H 1.0529 0.1445 0.7508 0.147 Uiso 0.653(6) 1 calc PR A 1 
H15B H 0.9240 0.1552 0.6680 0.147 Uiso 0.653(6) 1 calc PR A 1 
H15C H 1.0331 0.1855 0.6358 0.147 Uiso 0.653(6) 1 calc PR A 1 
C16 C 0.9870(9) 0.0236(3) 0.6676(8) 0.0979(16) Uiso 0.653(6) 1 d PD A 1 
H16A H 0.9960 -0.0157 0.6258 0.147 Uiso 0.653(6) 1 calc PR A 1 
H16B H 0.9066 0.0266 0.6707 0.147 Uiso 0.653(6) 1 calc PR A 1 
H16C H 1.0399 0.0215 0.7452 0.147 Uiso 0.653(6) 1 calc PR A 1 
C14A C 1.0537(17) 0.0135(4) 0.6447(16) 0.0979(16) Uiso 0.347(6) 1 d PD A 2 
H14D H 0.9868 -0.0155 0.6168 0.147 Uiso 0.347(6) 1 calc PR A 2 
H14E H 1.0808 0.0119 0.7281 0.147 Uiso 0.347(6) 1 calc PR A 2 
H14F H 1.1165 -0.0003 0.6139 0.147 Uiso 0.347(6) 1 calc PR A 2 
C15A C 1.1187(12) 0.1348(7) 0.6446(15) 0.0979(16) Uiso 0.347(6) 1 d PD A 2 
H15D H 1.0893 0.1787 0.6218 0.147 Uiso 0.347(6) 1 calc PR A 2 
H15E H 1.1795 0.1241 0.6088 0.147 Uiso 0.347(6) 1 calc PR A 2 
H15F H 1.1512 0.1329 0.7276 0.147 Uiso 0.347(6) 1 calc PR A 2 
C16A C 0.9388(14) 0.1153(9) 0.6745(14) 0.0979(16) Uiso 0.347(6) 1 d PD A 2 
H16D H 0.9150 0.1591 0.6458 0.147 Uiso 0.347(6) 1 calc PR A 2 
H16E H 0.9831 0.1177 0.7553 0.147 Uiso 0.347(6) 1 calc PR A 2 
H16F H 0.8696 0.0883 0.6657 0.147 Uiso 0.347(6) 1 calc PR A 2 
C20 C 0.9442(4) 0.0417(2) 0.1780(4) 0.0482(10) Uani 1 1 d . B . 
C23 C 1.0152(4) 0.0019(2) 0.1134(5) 0.0775(16) Uani 1 1 d D . . 
C24 C 0.9771(15) -0.0709(3) 0.0942(16) 0.132(2) Uiso 0.464(5) 1 d PD B 1 
H24A H 0.9705 -0.0894 0.1657 0.197 Uiso 0.464(5) 1 calc PR B 1 
H24B H 1.0353 -0.0953 0.0691 0.197 Uiso 0.464(5) 1 calc PR B 1 
H24C H 0.9017 -0.0737 0.0358 0.197 Uiso 0.464(5) 1 calc PR B 1 
C25 C 1.0132(16) 0.0344(8) -0.0026(9) 0.132(2) Uiso 0.464(5) 1 d PD B 1 
H25A H 1.0431 0.0789 0.0112 0.197 Uiso 0.464(5) 1 calc PR B 1 
H25B H 0.9332 0.0353 -0.0528 0.197 Uiso 0.464(5) 1 calc PR B 1 
H25C H 1.0621 0.0093 -0.0388 0.197 Uiso 0.464(5) 1 calc PR B 1 
C26 C 1.1485(6) 0.0076(9) 0.1759(14) 0.132(2) Uiso 0.464(5) 1 d PD B 1 
H26A H 1.1690 0.0534 0.1928 0.197 Uiso 0.464(5) 1 calc PR B 1 
H26B H 1.1929 -0.0098 0.1268 0.197 Uiso 0.464(5) 1 calc PR B 1 
H26C H 1.1672 -0.0172 0.2472 0.197 Uiso 0.464(5) 1 calc PR B 1 
C24A C 0.9286(11) -0.0321(7) 0.0085(9) 0.132(2) Uiso 0.536(5) 1 d PD B 2 
H24D H 0.8855 0.0010 -0.0447 0.197 Uiso 0.536(5) 1 calc PR B 2 
H24E H 0.8740 -0.0590 0.0344 0.197 Uiso 0.536(5) 1 calc PR B 2 
H24F H 0.9723 -0.0596 -0.0300 0.197 Uiso 0.536(5) 1 calc PR B 2 
C25A C 1.1051(11) 0.0426(6) 0.0716(13) 0.132(2) Uiso 0.536(5) 1 d PD B 2 
H25D H 1.0645 0.0777 0.0216 0.197 Uiso 0.536(5) 1 calc PR B 2 
H25E H 1.1439 0.0143 0.0295 0.197 Uiso 0.536(5) 1 calc PR B 2 
H25F H 1.1633 0.0613 0.1375 0.197 Uiso 0.536(5) 1 calc PR B 2 
C26A C 1.0839(12) -0.0501(6) 0.2003(10) 0.132(2) Uiso 0.536(5) 1 d PD B 2 
H26D H 1.1304 -0.0284 0.2697 0.197 Uiso 0.536(5) 1 calc PR B 2 
H26E H 1.1354 -0.0745 0.1662 0.197 Uiso 0.536(5) 1 calc PR B 2 
H26F H 1.0288 -0.0800 0.2194 0.197 Uiso 0.536(5) 1 calc PR B 2 
C30 C 0.5415(4) 0.0835(2) 0.3738(4) 0.0479(10) Uani 1 1 d . C . 
C33 C 0.4973(4) 0.07494(19) 0.4792(4) 0.0677(13) Uani 1 1 d D . . 
C34 C 0.5609(9) 0.0205(5) 0.5636(8) 0.0981(16) Uiso 0.565(6) 1 d PD C 1 
H34A H 0.5687 -0.0185 0.5205 0.147 Uiso 0.565(6) 1 calc PR C 1 
H34B H 0.5155 0.0100 0.6160 0.147 Uiso 0.565(6) 1 calc PR C 1 
H34C H 0.6383 0.0358 0.6071 0.147 Uiso 0.565(6) 1 calc PR C 1 
C35 C 0.3758(6) 0.0421(6) 0.4267(9) 0.0981(16) Uiso 0.565(6) 1 d PD C 1 
H35A H 0.3861 0.0008 0.3912 0.147 Uiso 0.565(6) 1 calc PR C 1 
H35B H 0.3262 0.0709 0.3691 0.147 Uiso 0.565(6) 1 calc PR C 1 
H35C H 0.3390 0.0341 0.4871 0.147 Uiso 0.565(6) 1 calc PR C 1 
C36 C 0.4788(11) 0.1408(4) 0.5355(10) 0.0981(16) Uiso 0.565(6) 1 d PD C 1 
H36A H 0.4400 0.1718 0.4760 0.147 Uiso 0.565(6) 1 calc PR C 1 
H36B H 0.5545 0.1583 0.5793 0.147 Uiso 0.565(6) 1 calc PR C 1 
H36C H 0.4305 0.1334 0.5864 0.147 Uiso 0.565(6) 1 calc PR C 1 
C34A C 0.6115(8) 0.0709(8) 0.5811(9) 0.0981(16) Uiso 0.435(6) 1 d PD C 2 
H34D H 0.6559 0.1112 0.5852 0.147 Uiso 0.435(6) 1 calc PR C 2 
H34E H 0.6585 0.0341 0.5694 0.147 Uiso 0.435(6) 1 calc PR C 2 
H34F H 0.5914 0.0648 0.6524 0.147 Uiso 0.435(6) 1 calc PR C 2 
C35A C 0.4377(13) 0.0085(4) 0.4896(14) 0.0981(16) Uiso 0.435(6) 1 d PD C 2 
H35D H 0.4895 -0.0272 0.4831 0.147 Uiso 0.435(6) 1 calc PR C 2 
H35E H 0.3643 0.0050 0.4285 0.147 Uiso 0.435(6) 1 calc PR C 2 
H35F H 0.4222 0.0061 0.5636 0.147 Uiso 0.435(6) 1 calc PR C 2 
C36A C 0.4247(12) 0.1342(5) 0.5009(14) 0.0981(16) Uiso 0.435(6) 1 d PD C 2 
H36D H 0.4667 0.1746 0.4974 0.147 Uiso 0.435(6) 1 calc PR C 2 
H36E H 0.4128 0.1300 0.5763 0.147 Uiso 0.435(6) 1 calc PR C 2 
H36F H 0.3490 0.1350 0.4425 0.147 Uiso 0.435(6) 1 calc PR C 2 
C40 C 0.5416(4) 0.0285(2) 0.0597(4) 0.0528(10) Uani 1 1 d . D . 
C43 C 0.4798(4) -0.0082(2) -0.0514(4) 0.0766(16) Uani 1 1 d D . . 
C44 C 0.4230(7) -0.0705(3) -0.0172(8) 0.1078(17) Uiso 0.763(6) 1 d PD D 1 
H44A H 0.4820 -0.0951 0.0399 0.162 Uiso 0.763(6) 1 calc PR D 1 
H44B H 0.3912 -0.0976 -0.0848 0.162 Uiso 0.763(6) 1 calc PR D 1 
H44C H 0.3602 -0.0577 0.0146 0.162 Uiso 0.763(6) 1 calc PR D 1 
C45 C 0.3914(7) 0.0362(4) -0.1389(7) 0.1078(17) Uiso 0.763(6) 1 d PD D 1 
H45A H 0.4320 0.0746 -0.1553 0.162 Uiso 0.763(6) 1 calc PR D 1 
H45B H 0.3295 0.0498 -0.1066 0.162 Uiso 0.763(6) 1 calc PR D 1 
H45C H 0.3575 0.0119 -0.2095 0.162 Uiso 0.763(6) 1 calc PR D 1 
C46 C 0.5741(7) -0.0287(5) -0.1102(8) 0.1078(17) Uiso 0.763(6) 1 d PD D 1 
H46A H 0.6101 0.0103 -0.1312 0.162 Uiso 0.763(6) 1 calc PR D 1 
H46B H 0.5373 -0.0541 -0.1788 0.162 Uiso 0.763(6) 1 calc PR D 1 
H46C H 0.6339 -0.0551 -0.0573 0.162 Uiso 0.763(6) 1 calc PR D 1 
C44A C 0.535(2) -0.0704(9) -0.088(3) 0.1078(17) Uiso 0.237(6) 1 d PD D 2 
H44D H 0.4837 -0.0864 -0.1610 0.162 Uiso 0.237(6) 1 calc PR D 2 
H44E H 0.5437 -0.1041 -0.0300 0.162 Uiso 0.237(6) 1 calc PR D 2 
H44F H 0.6111 -0.0596 -0.0973 0.162 Uiso 0.237(6) 1 calc PR D 2 
C45A C 0.3445(5) -0.0037(14) -0.077(3) 0.1078(17) Uiso 0.237(6) 1 d PD D 2 
H45D H 0.3225 0.0411 -0.0657 0.162 Uiso 0.237(6) 1 calc PR D 2 
H45E H 0.3193 -0.0326 -0.0249 0.162 Uiso 0.237(6) 1 calc PR D 2 
H45F H 0.3070 -0.0169 -0.1557 0.162 Uiso 0.237(6) 1 calc PR D 2 
C46A C 0.466(3) 0.0365(12) -0.1578(16) 0.1078(17) Uiso 0.237(6) 1 d PD D 2 
H46D H 0.4354 0.0789 -0.1442 0.162 Uiso 0.237(6) 1 calc PR D 2 
H46E H 0.4126 0.0162 -0.2249 0.162 Uiso 0.237(6) 1 calc PR D 2 
H46F H 0.5423 0.0425 -0.1708 0.162 Uiso 0.237(6) 1 calc PR D 2 
C50 C 0.7242(4) 0.2180(2) 0.0216(3) 0.0438(10) Uani 1 1 d . E . 
C53 C 0.7330(4) 0.23607(19) -0.0972(4) 0.0585(12) Uani 1 1 d D . . 
C54 C 0.7781(9) 0.1726(4) -0.1405(9) 0.1023(16) Uiso 0.559(4) 1 d PD E 1 
H54A H 0.7222 0.1374 -0.1443 0.153 Uiso 0.559(4) 1 calc PR E 1 
H54B H 0.8536 0.1605 -0.0879 0.153 Uiso 0.559(4) 1 calc PR E 1 
H54C H 0.7869 0.1802 -0.2165 0.153 Uiso 0.559(4) 1 calc PR E 1 
C55 C 0.8192(9) 0.2941(4) -0.0897(11) 0.1023(16) Uiso 0.559(4) 1 d PD E 1 
H55A H 0.8956 0.2826 -0.0380 0.153 Uiso 0.559(4) 1 calc PR E 1 
H55B H 0.7893 0.3327 -0.0608 0.153 Uiso 0.559(4) 1 calc PR E 1 
H55C H 0.8268 0.3032 -0.1657 0.153 Uiso 0.559(4) 1 calc PR E 1 
C56 C 0.6122(6) 0.2544(6) -0.1819(8) 0.1023(16) Uiso 0.559(4) 1 d PD E 1 
H56A H 0.5580 0.2181 -0.1878 0.153 Uiso 0.559(4) 1 calc PR E 1 
H56B H 0.6216 0.2636 -0.2571 0.153 Uiso 0.559(4) 1 calc PR E 1 
H56C H 0.5814 0.2930 -0.1538 0.153 Uiso 0.559(4) 1 calc PR E 1 
C54A C 0.8599(6) 0.2411(8) -0.1067(13) 0.1023(16) Uiso 0.441(4) 1 d PD E 2 
H54D H 0.9072 0.2677 -0.0439 0.153 Uiso 0.441(4) 1 calc PR E 2 
H54E H 0.8582 0.2614 -0.1795 0.153 Uiso 0.441(4) 1 calc PR E 2 
H54F H 0.8937 0.1976 -0.1027 0.153 Uiso 0.441(4) 1 calc PR E 2 
C55A C 0.6805(13) 0.3058(4) -0.1266(13) 0.1023(16) Uiso 0.441(4) 1 d PD E 2 
H55D H 0.7269 0.3371 -0.0718 0.153 Uiso 0.441(4) 1 calc PR E 2 
H55E H 0.6001 0.3062 -0.1228 0.153 Uiso 0.441(4) 1 calc PR E 2 
H55F H 0.6816 0.3176 -0.2037 0.153 Uiso 0.441(4) 1 calc PR E 2 
C56A C 0.6537(11) 0.1912(6) -0.1911(9) 0.1023(16) Uiso 0.441(4) 1 d PD E 2 
H56D H 0.5750 0.1903 -0.1827 0.153 Uiso 0.441(4) 1 calc PR E 2 
H56E H 0.6858 0.1471 -0.1829 0.153 Uiso 0.441(4) 1 calc PR E 2 
H56F H 0.6506 0.2082 -0.2666 0.153 Uiso 0.441(4) 1 calc PR E 2 
C60 C 0.7148(4) 0.27053(19) 0.3385(4) 0.0406(9) Uani 1 1 d . . . 
C63 C 0.7044(4) 0.3218(2) 0.4303(4) 0.0473(10) Uani 1 1 d . . . 
C64 C 0.7639(5) 0.2927(3) 0.5504(5) 0.1012(19) Uiso 1 1 d . . . 
H64A H 0.7233 0.2529 0.5606 0.152 Uiso 1 1 calc R . . 
H64B H 0.7605 0.3243 0.6091 0.152 Uiso 1 1 calc R . . 
H64C H 0.8454 0.2826 0.5571 0.152 Uiso 1 1 calc R . . 
C65 C 0.7681(5) 0.3846(3) 0.4129(5) 0.0876(17) Uiso 1 1 d . . . 
H65A H 0.8492 0.3744 0.4183 0.131 Uiso 1 1 calc R . . 
H65B H 0.7658 0.4163 0.4719 0.131 Uiso 1 1 calc R . . 
H65C H 0.7296 0.4029 0.3376 0.131 Uiso 1 1 calc R . . 
C66 C 0.5749(5) 0.3346(3) 0.4209(6) 0.0973(19) Uiso 1 1 d . . . 
H66A H 0.5378 0.2938 0.4327 0.146 Uiso 1 1 calc R . . 
H66B H 0.5352 0.3518 0.3450 0.146 Uiso 1 1 calc R . . 
H66C H 0.5696 0.3662 0.4789 0.146 Uiso 1 1 calc R . . 
C102 C 1.1431(4) 0.2135(3) 0.2969(4) 0.0701(14) Uani 1 1 d . . . 
H10A H 1.1542 0.1685 0.3128 0.084 Uiso 1 1 calc R . . 
C103 C 1.2426(5) 0.2520(3) 0.2961(5) 0.0866(18) Uani 1 1 d . . . 
H10B H 1.3175 0.2329 0.3112 0.104 Uiso 1 1 calc R . . 
C104 C 1.2259(5) 0.3176(3) 0.2725(5) 0.0913(18) Uani 1 1 d . . . 
H10C H 1.2896 0.3444 0.2705 0.110 Uiso 1 1 calc R . . 
C105 C 1.1143(5) 0.3442(3) 0.2516(5) 0.0804(16) Uani 1 1 d . . . 
H10D H 1.1012 0.3893 0.2365 0.096 Uiso 1 1 calc R . . 
C106 C 1.0221(4) 0.3025(2) 0.2537(4) 0.0626(13) Uani 1 1 d . . . 
H10E H 0.9464 0.3205 0.2382 0.075 Uiso 1 1 calc R . . 
C202 C 0.6511(5) -0.1074(2) 0.3290(4) 0.0680(14) Uani 1 1 d . . . 
H20A H 0.5779 -0.0868 0.2984 0.082 Uiso 1 1 calc R . . 
C203 C 0.6536(6) -0.1730(3) 0.3641(6) 0.0857(17) Uani 1 1 d . . . 
H20B H 0.5831 -0.1961 0.3559 0.103 Uiso 1 1 calc R . . 
C204 C 0.7600(7) -0.2033(3) 0.4107(6) 0.0935(19) Uani 1 1 d . . . 
H20C H 0.7632 -0.2469 0.4369 0.112 Uiso 1 1 calc R . . 
C205 C 0.8610(6) -0.1695(3) 0.4186(5) 0.0856(17) Uani 1 1 d . . . 
H20D H 0.9345 -0.1901 0.4466 0.103 Uiso 1 1 calc R . . 
C206 C 0.8534(4) -0.1026(2) 0.3838(4) 0.0628(13) Uani 1 1 d . . . 
H20E H 0.9230 -0.0785 0.3934 0.075 Uiso 1 1 calc R . . 
C302 C 0.3972(4) 0.2710(3) 0.0338(5) 0.0732(15) Uani 1 1 d . . . 
H30A H 0.4667 0.2958 0.0490 0.088 Uiso 1 1 calc R . . 
C303 C 0.2939(5) 0.2982(3) -0.0399(6) 0.0938(19) Uani 1 1 d . . . 
H30B H 0.2954 0.3387 -0.0767 0.113 Uiso 1 1 calc R . . 
C304 C 0.1929(6) 0.2646(3) -0.0562(6) 0.098(2) Uani 1 1 d . . . 
H30C H 0.1218 0.2827 -0.1017 0.118 Uiso 1 1 calc R . . 
C305 C 0.1935(5) 0.2047(3) -0.0070(7) 0.113(2) Uani 1 1 d . . . 
H30D H 0.1234 0.1807 -0.0191 0.135 Uiso 1 1 calc R . . 
C306 C 0.2998(4) 0.1792(3) 0.0618(5) 0.0827(16) Uani 1 1 d . . . 
H30E H 0.2997 0.1373 0.0943 0.099 Uiso 1 1 calc R . . 
 
loop_ 
 _atom_site_aniso_label 
 _atom_site_aniso_U_11 
 _atom_site_aniso_U_22 
 _atom_site_aniso_U_33 
 _atom_site_aniso_U_23 
 _atom_site_aniso_U_13 
 _atom_site_aniso_U_12 
Fe1 0.0563(3) 0.0399(3) 0.0382(3) 0.0025(3) 0.0149(2) 0.0040(3) 
Fe2 0.0509(3) 0.0404(3) 0.0415(3) 0.0016(3) 0.0113(3) -0.0011(3) 
Fe3 0.0570(4) 0.0418(3) 0.0389(3) -0.0014(3) 0.0143(3) -0.0045(3) 
O1 0.0390(15) 0.0435(15) 0.0394(15) 0.0014(12) 0.0096(12) -0.0005(11) 
O11 0.0567(19) 0.0566(18) 0.0570(19) 0.0210(15) 0.0060(15) -0.0098(14) 
O12 0.068(2) 0.0484(18) 0.0505(17) 0.0046(14) 0.0035(15) -0.0094(16) 
O22 0.069(2) 0.0473(17) 0.079(2) 0.0020(16) 0.0392(19) 0.0034(14) 
O21 0.068(2) 0.048(2) 0.083(2) -0.0071(16) 0.0328(18) -0.0042(15) 
O31 0.0729(19) 0.0456(16) 0.0656(19) 0.0089(16) 0.0363(16) 0.0010(17) 
O32 0.063(2) 0.058(2) 0.067(2) 0.0221(17) 0.0271(16) 0.0067(15) 
O41 0.065(2) 0.0497(18) 0.0537(19) -0.0013(15) 0.0041(16) 0.0064(15) 
O42 0.062(2) 0.054(2) 0.067(2) -0.0147(17) -0.0065(16) 0.0084(16) 
O51 0.0474(19) 0.092(2) 0.0484(18) 0.0128(16) 0.0164(15) 0.0037(16) 
O52 0.0545(19) 0.071(2) 0.0426(17) 0.0143(15) 0.0055(15) -0.0128(15) 
O61 0.0506(19) 0.0539(19) 0.061(2) -0.0129(15) -0.0014(16) 0.0000(14) 
O62 0.0501(19) 0.0551(18) 0.067(2) -0.0160(15) 0.0231(16) -0.0044(14) 
N101 0.047(2) 0.058(2) 0.048(2) -0.0008(18) 0.0111(17) 0.0036(18) 
N201 0.062(3) 0.045(2) 0.054(2) 0.0068(18) 0.0090(19) -0.0017(19) 
N301 0.052(2) 0.052(2) 0.060(2) -0.0065(19) 0.0201(18) -0.0066(17) 
C10 0.050(3) 0.045(3) 0.048(3) 0.006(2) 0.015(2) 0.008(2) 
C13 0.059(3) 0.049(3) 0.047(3) 0.010(2) -0.001(2) 0.001(2) 
C20 0.057(3) 0.039(2) 0.047(2) -0.001(2) 0.013(2) 0.005(2) 
C23 0.078(4) 0.071(3) 0.098(4) -0.006(3) 0.048(3) -0.013(3) 
C30 0.042(2) 0.053(3) 0.048(3) 0.001(2) 0.013(2) -0.011(2) 
C33 0.071(3) 0.068(3) 0.074(3) 0.017(3) 0.038(3) 0.006(2) 
C40 0.059(3) 0.049(3) 0.049(3) 0.000(2) 0.012(2) 0.000(2) 
C43 0.075(4) 0.067(3) 0.067(3) -0.020(3) -0.012(3) 0.012(3) 
C50 0.049(3) 0.041(2) 0.041(2) 0.0031(19) 0.013(2) 0.0040(19) 
C53 0.059(3) 0.072(3) 0.042(2) 0.009(2) 0.011(2) 0.000(2) 
C60 0.049(3) 0.034(2) 0.041(2) 0.0075(18) 0.016(2) -0.0012(18) 
C63 0.051(3) 0.036(2) 0.055(3) -0.005(2) 0.015(2) -0.0002(18) 
C102 0.057(3) 0.073(3) 0.076(4) -0.002(3) 0.013(3) 0.001(3) 
C103 0.056(3) 0.102(5) 0.104(5) -0.005(4) 0.025(3) -0.010(3) 
C104 0.073(4) 0.085(4) 0.109(5) 0.012(4) 0.016(3) -0.027(3) 
C105 0.075(4) 0.067(3) 0.096(4) 0.010(3) 0.020(3) -0.016(3) 
C106 0.060(3) 0.052(3) 0.074(3) 0.005(3) 0.018(3) -0.002(2) 
C202 0.076(4) 0.053(3) 0.072(3) 0.008(3) 0.018(3) -0.013(3) 
C203 0.098(5) 0.049(3) 0.111(5) 0.010(3) 0.031(4) -0.020(3) 
C204 0.137(6) 0.045(3) 0.106(5) 0.011(3) 0.047(4) -0.001(4) 
C205 0.098(5) 0.057(3) 0.103(5) 0.011(3) 0.029(4) 0.009(3) 
C206 0.065(3) 0.052(3) 0.069(3) 0.007(2) 0.017(3) 0.004(2) 
C302 0.057(3) 0.060(3) 0.104(4) 0.018(3) 0.027(3) 0.004(2) 
C303 0.074(4) 0.082(4) 0.115(5) 0.023(4) 0.011(4) 0.019(3) 
C304 0.073(4) 0.076(4) 0.122(6) 0.006(4) -0.009(4) 0.017(3) 
C305 0.056(4) 0.089(5) 0.173(7) -0.003(5) 0.002(4) -0.008(3) 
C306 0.055(3) 0.069(4) 0.117(4) 0.008(4) 0.015(3) 0.000(3) 
 
_geom_special_details 
; 
 All esds (except the esd in the dihedral angle between two l.s. planes) 
 are estimated using the full covariance matrix.  The cell esds are taken 
 into account individually in the estimation of esds in distances, angles 
 and torsion angles; correlations between esds in cell parameters are only 
 used when they are defined by crystal symmetry.  An approximate (isotropic) 
 treatment of cell esds is used for estimating esds involving l.s. planes. 
; 
 
loop_ 
 _geom_bond_atom_site_label_1 
 _geom_bond_atom_site_label_2 
 _geom_bond_distance 
 _geom_bond_site_symmetry_2 
 _geom_bond_publ_flag 
Fe1 O1 1.913(3) . ? 
Fe1 O52 2.029(3) . ? 
Fe1 O11 2.054(3) . ? 
Fe1 O62 2.063(3) . ? 
Fe1 O21 2.097(3) . ? 
Fe1 N101 2.249(4) . ? 
Fe1 Fe2 3.2711(8) . ? 
Fe1 Fe3 3.3539(9) . ? 
Fe2 O1 1.849(3) . ? 
Fe2 O31 2.008(3) . ? 
Fe2 O22 2.014(3) . ? 
Fe2 O41 2.044(3) . ? 
Fe2 O12 2.052(3) . ? 
Fe2 N201 2.258(4) . ? 
Fe2 Fe3 3.3043(8) . ? 
Fe3 O1 1.970(3) . ? 
Fe3 O61 2.057(3) . ? 
Fe3 O42 2.064(3) . ? 
Fe3 O51 2.080(3) . ? 
Fe3 O32 2.116(3) . ? 
Fe3 N301 2.225(4) . ? 
O11 C10 1.256(5) . ? 
O12 C10 1.264(5) . ? 
O22 C20 1.250(5) . ? 
O21 C20 1.241(5) . ? 
O31 C30 1.249(5) . ? 
O32 C30 1.260(5) . ? 
O41 C40 1.267(5) . ? 
O42 C40 1.239(5) . ? 
O51 C50 1.250(5) . ? 
O52 C50 1.262(5) . ? 
O61 C60 1.236(5) . ? 
O62 C60 1.250(5) . ? 
N101 C102 1.316(6) . ? 
N101 C106 1.330(5) . ? 
N201 C202 1.325(6) . ? 
N201 C206 1.336(6) . ? 
N301 C302 1.325(6) . ? 
N301 C306 1.338(6) . ? 
C10 C13 1.509(5) . ? 
C13 C15 1.5334(10) . ? 
C13 C14A 1.5337(10) . ? 
C13 C16 1.5337(10) . ? 
C13 C15A 1.5339(10) . ? 
C13 C14 1.5340(10) . ? 
C13 C16A 1.5341(10) . ? 
C20 C23 1.524(6) . ? 
C23 C24 1.5337(10) . ? 
C23 C26A 1.5338(10) . ? 
C23 C25 1.5339(10) . ? 
C23 C25A 1.5339(10) . ? 
C23 C24A 1.5339(10) . ? 
C23 C26 1.5341(10) . ? 
C30 C33 1.512(6) . ? 
C33 C35A 1.5333(10) . ? 
C33 C36 1.5336(10) . ? 
C33 C34 1.5336(10) . ? 
C33 C36A 1.5338(10) . ? 
C33 C34A 1.5346(10) . ? 
C33 C35 1.5350(10) . ? 
C40 C43 1.514(6) . ? 
C43 C45 1.5336(10) . ? 
C43 C44A 1.5337(10) . ? 
C43 C44 1.5338(10) . ? 
C43 C46A 1.5341(10) . ? 
C43 C45A 1.5343(10) . ? 
C43 C46 1.5345(10) . ? 
C50 C53 1.505(6) . ? 
C53 C56A 1.5334(10) . ? 
C53 C56 1.5335(10) . ? 
C53 C55 1.5336(10) . ? 
C53 C54A 1.5337(10) . ? 
C53 C54 1.5338(10) . ? 
C53 C55A 1.5345(10) . ? 
C60 C63 1.542(5) . ? 
C63 C65 1.517(7) . ? 
C63 C66 1.517(7) . ? 
C63 C64 1.527(7) . ? 
C102 C103 1.406(7) . ? 
C103 C104 1.356(8) . ? 
C104 C105 1.372(8) . ? 
C105 C106 1.379(7) . ? 
C202 C203 1.387(7) . ? 
C203 C204 1.359(8) . ? 
C204 C205 1.348(8) . ? 
C205 C206 1.408(7) . ? 
C302 C303 1.391(7) . ? 
C303 C304 1.332(8) . ? 
C304 C305 1.344(8) . ? 
C305 C306 1.383(8) . ? 
 
loop_ 
 _geom_angle_atom_site_label_1 
 _geom_angle_atom_site_label_2 
 _geom_angle_atom_site_label_3 
 _geom_angle 
 _geom_angle_site_symmetry_1 
 _geom_angle_site_symmetry_3 
 _geom_angle_publ_flag 
O1 Fe1 O52 95.68(11) . . ? 
O1 Fe1 O11 96.65(11) . . ? 
O52 Fe1 O11 167.48(12) . . ? 
O1 Fe1 O62 93.94(11) . . ? 
O52 Fe1 O62 93.36(13) . . ? 
O11 Fe1 O62 87.99(13) . . ? 
O1 Fe1 O21 94.57(11) . . ? 
O52 Fe1 O21 88.05(13) . . ? 
O11 Fe1 O21 88.78(13) . . ? 
O62 Fe1 O21 171.19(12) . . ? 
O1 Fe1 N101 176.93(13) . . ? 
O52 Fe1 N101 81.45(12) . . ? 
O11 Fe1 N101 86.27(12) . . ? 
O62 Fe1 N101 85.19(12) . . ? 
O21 Fe1 N101 86.43(12) . . ? 
O1 Fe1 Fe2 29.06(8) . . ? 
O52 Fe1 Fe2 115.64(8) . . ? 
O11 Fe1 Fe2 75.10(8) . . ? 
O62 Fe1 Fe2 112.00(8) . . ? 
O21 Fe1 Fe2 74.99(8) . . ? 
N101 Fe1 Fe2 153.72(10) . . ? 
O1 Fe1 Fe3 30.76(8) . . ? 
O52 Fe1 Fe3 73.48(8) . . ? 
O11 Fe1 Fe3 118.78(9) . . ? 
O62 Fe1 Fe3 74.53(8) . . ? 
O21 Fe1 Fe3 114.16(9) . . ? 
N101 Fe1 Fe3 146.40(10) . . ? 
Fe2 Fe1 Fe3 59.820(17) . . ? 
O1 Fe2 O31 95.40(12) . . ? 
O1 Fe2 O22 97.41(12) . . ? 
O31 Fe2 O22 167.19(13) . . ? 
O1 Fe2 O41 97.43(12) . . ? 
O31 Fe2 O41 91.19(13) . . ? 
O22 Fe2 O41 87.25(14) . . ? 
O1 Fe2 O12 95.48(11) . . ? 
O31 Fe2 O12 89.90(13) . . ? 
O22 Fe2 O12 88.79(13) . . ? 
O41 Fe2 O12 166.88(12) . . ? 
O1 Fe2 N201 178.41(13) . . ? 
O31 Fe2 N201 83.37(13) . . ? 
O22 Fe2 N201 83.82(13) . . ? 
O41 Fe2 N201 83.62(12) . . ? 
O12 Fe2 N201 83.52(12) . . ? 
O1 Fe2 Fe1 30.17(8) . . ? 
O31 Fe2 Fe1 117.06(9) . . ? 
O22 Fe2 Fe1 74.87(9) . . ? 
O41 Fe2 Fe1 115.52(9) . . ? 
O12 Fe2 Fe1 75.34(8) . . ? 
N201 Fe2 Fe1 150.04(10) . . ? 
O1 Fe2 Fe3 31.16(8) . . ? 
O31 Fe2 Fe3 72.58(9) . . ? 
O22 Fe2 Fe3 119.29(9) . . ? 
O41 Fe2 Fe3 77.11(8) . . ? 
O12 Fe2 Fe3 115.63(9) . . ? 
N201 Fe2 Fe3 148.58(10) . . ? 
Fe1 Fe2 Fe3 61.336(19) . . ? 
O1 Fe3 O61 94.84(11) . . ? 
O1 Fe3 O42 94.07(11) . . ? 
O61 Fe3 O42 170.90(12) . . ? 
O1 Fe3 O51 92.47(11) . . ? 
O61 Fe3 O51 92.64(13) . . ? 
O42 Fe3 O51 88.87(13) . . ? 
O1 Fe3 O32 93.58(11) . . ? 
O61 Fe3 O32 86.51(13) . . ? 
O42 Fe3 O32 91.04(13) . . ? 
O51 Fe3 O32 173.93(12) . . ? 
O1 Fe3 N301 175.22(13) . . ? 
O61 Fe3 N301 87.84(12) . . ? 
O42 Fe3 N301 83.41(12) . . ? 
O51 Fe3 N301 83.43(13) . . ? 
O32 Fe3 N301 90.53(13) . . ? 
O1 Fe3 Fe2 29.06(8) . . ? 
O61 Fe3 Fe2 116.09(8) . . ? 
O42 Fe3 Fe2 71.65(9) . . ? 
O51 Fe3 Fe2 109.66(9) . . ? 
O32 Fe3 Fe2 76.03(8) . . ? 
N301 Fe3 Fe2 151.16(9) . . ? 
O1 Fe3 Fe1 29.78(8) . . ? 
O61 Fe3 Fe1 72.73(8) . . ? 
O42 Fe3 Fe1 116.28(9) . . ? 
O51 Fe3 Fe1 74.15(8) . . ? 
O32 Fe3 Fe1 111.24(9) . . ? 
N301 Fe3 Fe1 149.24(9) . . ? 
Fe2 Fe3 Fe1 58.844(17) . . ? 
Fe2 O1 Fe1 120.76(13) . . ? 
Fe2 O1 Fe3 119.77(13) . . ? 
Fe1 O1 Fe3 119.46(13) . . ? 
C10 O11 Fe1 131.8(3) . . ? 
C10 O12 Fe2 131.8(3) . . ? 
C20 O22 Fe2 133.4(3) . . ? 
C20 O21 Fe1 129.9(3) . . ? 
C30 O31 Fe2 135.1(3) . . ? 
C30 O32 Fe3 126.8(3) . . ? 
C40 O41 Fe2 128.4(3) . . ? 
C40 O42 Fe3 134.4(3) . . ? 
C50 O51 Fe3 131.3(3) . . ? 
C50 O52 Fe1 133.0(3) . . ? 
C60 O61 Fe3 131.8(3) . . ? 
C60 O62 Fe1 130.6(3) . . ? 
C102 N101 C106 116.8(4) . . ? 
C102 N101 Fe1 123.1(3) . . ? 
C106 N101 Fe1 119.8(3) . . ? 
C202 N201 C206 117.8(4) . . ? 
C202 N201 Fe2 121.3(3) . . ? 
C206 N201 Fe2 120.8(3) . . ? 
C302 N301 C306 115.6(4) . . ? 
C302 N301 Fe3 121.0(3) . . ? 
C306 N301 Fe3 122.7(3) . . ? 
O11 C10 O12 124.9(4) . . ? 
O11 C10 C13 117.3(4) . . ? 
O12 C10 C13 117.8(4) . . ? 
C10 C13 C15 109.8(5) . . ? 
C10 C13 C14A 114.0(8) . . ? 
C15 C13 C14A 133.1(8) . . ? 
C10 C13 C16 113.3(5) . . ? 
C15 C13 C16 110.9(6) . . ? 
C14A C13 C16 35.1(7) . . ? 
C10 C13 C15A 115.8(8) . . ? 
C15 C13 C15A 57.7(8) . . ? 
C14A C13 C15A 113.2(10) . . ? 
C16 C13 C15A 130.4(8) . . ? 
C10 C13 C14 107.0(5) . . ? 
C15 C13 C14 104.4(6) . . ? 
C14A C13 C14 78.0(8) . . ? 
C16 C13 C14 111.0(6) . . ? 
C15A C13 C14 47.0(7) . . ? 
C10 C13 C16A 104.0(8) . . ? 
C15 C13 C16A 39.7(7) . . ? 
C14A C13 C16A 111.7(11) . . ? 
C16 C13 C16A 78.6(8) . . ? 
C15A C13 C16A 96.1(10) . . ? 
C14 C13 C16A 139.7(9) . . ? 
O21 C20 O22 125.5(4) . . ? 
O21 C20 C23 118.4(4) . . ? 
O22 C20 C23 116.1(4) . . ? 
C20 C23 C24 113.7(7) . . ? 
C20 C23 C26A 105.8(7) . . ? 
C24 C23 C26A 61.3(8) . . ? 
C20 C23 C25 111.9(8) . . ? 
C24 C23 C25 110.2(10) . . ? 
C26A C23 C25 140.9(9) . . ? 
C20 C23 C25A 114.7(7) . . ? 
C24 C23 C25A 131.4(9) . . ? 
C26A C23 C25A 108.1(9) . . ? 
C25 C23 C25A 45.9(7) . . ? 
C20 C23 C24A 108.8(7) . . ? 
C24 C23 C24A 49.7(8) . . ? 
C26A C23 C24A 110.3(8) . . ? 
C25 C23 C24A 67.2(9) . . ? 
C25A C23 C24A 109.0(9) . . ? 
C20 C23 C26 110.2(7) . . ? 
C24 C23 C26 111.0(10) . . ? 
C26A C23 C26 57.1(8) . . ? 
C25 C23 C26 99.0(9) . . ? 
C25A C23 C26 54.3(7) . . ? 
C24A C23 C26 140.9(9) . . ? 
O31 C30 O32 124.7(4) . . ? 
O31 C30 C33 116.6(4) . . ? 
O32 C30 C33 118.8(4) . . ? 
C30 C33 C35A 116.3(7) . . ? 
C30 C33 C36 113.5(5) . . ? 
C35A C33 C36 126.4(8) . . ? 
C30 C33 C34 114.5(5) . . ? 
C35A C33 C34 57.8(7) . . ? 
C36 C33 C34 115.6(7) . . ? 
C30 C33 C36A 113.4(7) . . ? 
C35A C33 C36A 112.1(8) . . ? 
C36 C33 C36A 25.1(7) . . ? 
C34 C33 C36A 129.3(8) . . ? 
C30 C33 C34A 103.9(6) . . ? 
C35A C33 C34A 101.7(8) . . ? 
C36 C33 C34A 84.1(7) . . ? 
C34 C33 C34A 44.6(6) . . ? 
C36A C33 C34A 107.9(9) . . ? 
C30 C33 C35 102.2(5) . . ? 
C35A C33 C35 42.6(6) . . ? 
C36 C33 C35 108.7(7) . . ? 
C34 C33 C35 100.4(7) . . ? 
C36A C33 C35 84.7(7) . . ? 
C34A C33 C35 143.1(8) . . ? 
O42 C40 O41 124.8(4) . . ? 
O42 C40 C43 118.4(4) . . ? 
O41 C40 C43 116.8(4) . . ? 
C40 C43 C45 112.1(5) . . ? 
C40 C43 C44A 121.3(12) . . ? 
C45 C43 C44A 122.5(12) . . ? 
C40 C43 C44 107.4(5) . . ? 
C45 C43 C44 113.6(6) . . ? 
C44A C43 C44 70.2(12) . . ? 
C40 C43 C46A 110.7(12) . . ? 
C45 C43 C46A 36.9(10) . . ? 
C44A C43 C46A 100.9(16) . . ? 
C44 C43 C46A 139.1(12) . . ? 
C40 C43 C45A 110.6(12) . . ? 
C45 C43 C45A 51.1(11) . . ? 
C44A C43 C45A 119.4(16) . . ? 
C44 C43 C45A 66.0(12) . . ? 
C46A C43 C45A 87.1(15) . . ? 
C40 C43 C46 108.1(5) . . ? 
C45 C43 C46 106.2(6) . . ? 
C44A C43 C46 39.2(11) . . ? 
C44 C43 C46 109.4(6) . . ? 
C46A C43 C46 71.9(12) . . ? 
C45A C43 C46 140.5(12) . . ? 
O51 C50 O52 125.1(4) . . ? 
O51 C50 C53 118.8(4) . . ? 
O52 C50 C53 116.1(4) . . ? 
C50 C53 C56A 111.1(6) . . ? 
C50 C53 C56 112.4(5) . . ? 
C56A C53 C56 53.5(7) . . ? 
C50 C53 C55 110.9(5) . . ? 
C56A C53 C55 138.0(8) . . ? 
C56 C53 C55 109.0(7) . . ? 
C50 C53 C54A 115.1(6) . . ? 
C56A C53 C54A 112.5(8) . . ? 
C56 C53 C54A 132.0(8) . . ? 
C55 C53 C54A 46.5(6) . . ? 
C50 C53 C54 104.2(5) . . ? 
C56A C53 C54 56.9(6) . . ? 
C56 C53 C54 108.7(6) . . ? 
C55 C53 C54 111.6(7) . . ? 
C54A C53 C54 65.8(7) . . ? 
C50 C53 C55A 107.8(6) . . ? 
C56A C53 C55A 104.6(8) . . ? 
C56 C53 C55A 52.6(6) . . ? 
C55 C53 C55A 62.0(7) . . ? 
C54A C53 C55A 104.9(8) . . ? 
C54 C53 C55A 147.3(8) . . ? 
O61 C60 O62 125.9(4) . . ? 
O61 C60 C63 117.8(4) . . ? 
O62 C60 C63 116.3(4) . . ? 
C65 C63 C66 112.0(4) . . ? 
C65 C63 C64 110.0(4) . . ? 
C66 C63 C64 108.1(4) . . ? 
C65 C63 C60 108.4(4) . . ? 
C66 C63 C60 110.3(4) . . ? 
C64 C63 C60 108.0(4) . . ? 
N101 C102 C103 123.6(5) . . ? 
C104 C103 C102 118.0(5) . . ? 
C103 C104 C105 119.5(5) . . ? 
C104 C105 C106 118.2(5) . . ? 
N101 C106 C105 123.9(5) . . ? 
N201 C202 C203 122.7(5) . . ? 
C204 C203 C202 119.3(5) . . ? 
C205 C204 C203 119.3(5) . . ? 
C204 C205 C206 119.0(6) . . ? 
N201 C206 C205 121.8(5) . . ? 
N301 C302 C303 124.1(5) . . ? 
C304 C303 C302 118.1(6) . . ? 
C303 C304 C305 120.1(6) . . ? 
C304 C305 C306 119.1(6) . . ? 
N301 C306 C305 122.9(6) . . ? 
 
_diffrn_measured_fraction_theta_max    0.929 
_diffrn_reflns_theta_full              30.45 
_diffrn_measured_fraction_theta_full   0.929 
_refine_diff_density_max    0.405 
_refine_diff_density_min   -0.326 
_refine_diff_density_rms    0.060 
#===END
 
data_fe295_s 
 
_audit_creation_method            SHELXL-97 
_chemical_name_systematic 
; 
 ? 
; 
_chemical_name_common             ? 
_chemical_melting_point           ? 
_chemical_formula_moiety          ? 
_chemical_formula_sum 
 'C45 H69 Fe3 N3 O13' 
_chemical_formula_weight          1027.58 
 
loop_ 
 _atom_type_symbol 
 _atom_type_description 
 _atom_type_scat_dispersion_real 
 _atom_type_scat_dispersion_imag 
 _atom_type_scat_source 
 'C'  'C'   0.0033   0.0016 
 'International Tables Vol C Tables 4.2.6.8 and 6.1.1.4' 
 'H'  'H'   0.0000   0.0000 
 'International Tables Vol C Tables 4.2.6.8 and 6.1.1.4' 
 'N'  'N'   0.0061   0.0033 
 'International Tables Vol C Tables 4.2.6.8 and 6.1.1.4' 
 'O'  'O'   0.0106   0.0060 
 'International Tables Vol C Tables 4.2.6.8 and 6.1.1.4' 
 'Fe'  'Fe'   0.3463   0.8444 
 'International Tables Vol C Tables 4.2.6.8 and 6.1.1.4' 
 
_symmetry_cell_setting            monoclinic
_symmetry_space_group_name_H-M    P2(1) 
 
loop_ 
 _symmetry_equiv_pos_as_xyz 
 'x, y, z' 
 '-x, y+1/2, -z' 
 
_cell_length_a                    11.824(2) 
_cell_length_b                    20.271(4) 
_cell_length_c                    12.011(2) 
_cell_angle_alpha                 90.00 
_cell_angle_beta                  106.983(4) 
_cell_angle_gamma                 90.00 
_cell_volume                      2753.3(8) 
_cell_formula_units_Z             2 
_cell_measurement_temperature     295(2) 
_cell_measurement_reflns_used    512
_cell_measurement_theta_min      3.04
_cell_measurement_theta_max      21.02 
 
_exptl_crystal_description       'irregular block'
_exptl_crystal_colour             'red brown'
_exptl_crystal_size_max           0.35
_exptl_crystal_size_mid           0.24
_exptl_crystal_size_min           0.24
_exptl_crystal_density_meas       ? 
_exptl_crystal_density_diffrn     1.239 
_exptl_crystal_density_method     'not measured' 
_exptl_crystal_F_000              1084 
_exptl_absorpt_coefficient_mu     0.836 
_exptl_absorpt_correction_type    integration
_exptl_absorpt_correction_T_min   0.728
_exptl_absorpt_correction_T_max   0.856
_exptl_absorpt_process_details    'XPREP, from face indices'
 
_exptl_special_details 
; 
 ? 
; 
 
_diffrn_ambient_temperature       295(2) 
_diffrn_radiation_wavelength      0.71073 
_diffrn_radiation_type            MoK\a 
_diffrn_radiation_source          'fine-focus sealed tube' 
_diffrn_radiation_monochromator   graphite 
_diffrn_measurement_device_type   'Bruker SMART CCD' 
_diffrn_measurement_method        'narrow /w-scans'
_diffrn_detector_area_resol_mean  ? 
_diffrn_standards_number          ? 
_diffrn_standards_interval_count  ? 
_diffrn_standards_interval_time   ? 
_diffrn_standards_decay_%         ? 
_diffrn_reflns_number             17591
_diffrn_reflns_av_R_equivalents   0.04
_diffrn_reflns_av_sigmaI/netI     0.0278 
_diffrn_reflns_limit_h_min        -16 
_diffrn_reflns_limit_h_max        15 
_diffrn_reflns_limit_k_min        -27 
_diffrn_reflns_limit_k_max        23 
_diffrn_reflns_limit_l_min        0 
_diffrn_reflns_limit_l_max        16 
_diffrn_reflns_theta_min          2.35 
_diffrn_reflns_theta_max          29.27 
_reflns_number_total              10137 
_reflns_number_gt                 9155 
_reflns_threshold_expression      >2sigma(I) 
 
_computing_data_collection       'Bruker SMART'
_computing_cell_refinement        'Bruker SMART'
_computing_data_reduction         'Bruker SAINT'
_computing_structure_solution     'SHELXS-97 (Sheldrick, 1990)' 
_computing_structure_refinement   'SHELXL-97 (Sheldrick, 1997)' 
_computing_molecular_graphics     ? 
_computing_publication_material   ? 
 
_refine_special_details 
; 
 Refinement of F^2^ against ALL reflections.  The weighted R-factor wR and 
 goodness of fit S are based on F^2^, conventional R-factors R are based 
 on F, with F set to zero for negative F^2^. The threshold expression of 
 F^2^ > 2sigma(F^2^) is used only for calculating R-factors(gt) etc. and is 
 not relevant to the choice of reflections for refinement.  R-factors based 
 on F^2^ are statistically about twice as large as those based on F, and R- 
 factors based on ALL data will be even larger. 
; 
 
_refine_ls_structure_factor_coef  Fsqd  
_refine_ls_matrix_type            full 
_refine_ls_weighting_scheme       calc  
_refine_ls_weighting_details 
 'calc w=1/[\s^2^(Fo^2^)+(0.0000P)^2^+2.0000P] where P=(Fo^2^+2Fc^2^)/3' 
_atom_sites_solution_primary      direct 
_atom_sites_solution_secondary    difmap 
_atom_sites_solution_hydrogens    geom 
_refine_ls_hydrogen_treatment     noref 
_refine_ls_extinction_method      none 
_refine_ls_extinction_coef        ? 
_refine_ls_abs_structure_details 
 'Flack H D (1983), Acta Cryst. A39, 876-881' 
_refine_ls_abs_structure_Flack    0.02(2) 
_refine_ls_number_reflns          10137 
_refine_ls_number_parameters      528 
_refine_ls_number_restraints      25 
_refine_ls_R_factor_all           0.0630 
_refine_ls_R_factor_gt            0.0544 
_refine_ls_wR_factor_ref          0.1123 
_refine_ls_wR_factor_gt           0.1065 
_refine_ls_goodness_of_fit_ref    1.340 
_refine_ls_restrained_S_all       1.341 
_refine_ls_shift/su_max           0.035 
_refine_ls_shift/su_mean          0.002 
 
loop_ 
 _atom_site_label 
 _atom_site_type_symbol 
 _atom_site_fract_x 
 _atom_site_fract_y 
 _atom_site_fract_z 
 _atom_site_U_iso_or_equiv 
 _atom_site_adp_type 
 _atom_site_occupancy 
 _atom_site_symmetry_multiplicity 
 _atom_site_calc_flag 
 _atom_site_refinement_flags 
 _atom_site_disorder_assembly 
 _atom_site_disorder_group 
Fe1 Fe 0.87404(5) 0.17420(4) 0.26099(5) 0.05327(16) Uani 1 1 d . . . 
Fe2 Fe 0.74112(6) 0.03490(4) 0.28002(5) 0.05415(16) Uani 1 1 d . . . 
Fe3 Fe 0.57895(6) 0.16509(4) 0.17348(5) 0.05454(16) Uani 1 1 d . . . 
O1 O 0.7327(2) 0.12342(15) 0.2393(2) 0.0472(6) Uani 1 1 d . . . 
O11 O 0.9618(3) 0.13764(19) 0.4217(3) 0.0716(10) Uani 1 1 d . . . 
O12 O 0.8630(3) 0.04734(19) 0.4393(3) 0.0709(10) Uani 1 1 d . . . 
O22 O 0.8733(3) 0.01002(19) 0.2136(4) 0.0767(11) Uani 1 1 d . . . 
O21 O 0.9582(3) 0.1030(2) 0.1864(4) 0.0769(11) Uani 1 1 d . . . 
O31 O 0.6102(3) 0.0384(2) 0.3556(3) 0.0715(9) Uani 1 1 d . . . 
O32 O 0.5104(3) 0.1312(2) 0.3062(3) 0.0743(10) Uani 1 1 d . . . 
O41 O 0.6266(3) 0.00047(18) 0.1281(3) 0.0717(10) Uani 1 1 d . . . 
O42 O 0.5073(3) 0.0859(2) 0.0716(3) 0.0818(12) Uani 1 1 d . . . 
O51 O 0.6266(3) 0.2040(2) 0.0342(3) 0.0733(11) Uani 1 1 d . . . 
O52 O 0.8206(3) 0.2190(2) 0.1031(3) 0.0718(10) Uani 1 1 d . . . 
O61 O 0.6206(3) 0.25010(19) 0.2673(3) 0.0706(10) Uani 1 1 d . . . 
O62 O 0.8153(3) 0.25074(19) 0.3434(3) 0.0679(9) Uani 1 1 d . . . 
N101 N 1.0339(3) 0.2377(2) 0.2779(4) 0.0630(10) Uani 1 1 d . . . 
N201 N 0.7494(4) -0.0723(2) 0.3327(4) 0.0675(11) Uani 1 1 d . . . 
N301 N 0.4045(3) 0.2112(2) 0.0854(4) 0.0639(11) Uani 1 1 d . . . 
C10 C 0.9408(4) 0.0902(3) 0.4778(4) 0.0545(11) Uani 1 1 d . A . 
C13 C 1.0159(4) 0.0832(3) 0.6035(4) 0.0674(13) Uani 1 1 d . . . 
C14 C 1.1462(10) 0.0819(8) 0.6035(11) 0.118(2) Uiso 0.626(7) 1 d P A 1 
H14A H 1.1598 0.0438 0.5618 0.176 Uiso 0.626(7) 1 calc PR A 1 
H14B H 1.1966 0.0801 0.6823 0.176 Uiso 0.626(7) 1 calc PR A 1 
H14C H 1.1634 0.1211 0.5665 0.176 Uiso 0.626(7) 1 calc PR A 1 
C15 C 1.0014(12) 0.1433(7) 0.6699(11) 0.118(2) Uiso 0.626(7) 1 d P A 1 
H15A H 1.0489 0.1391 0.7494 0.176 Uiso 0.626(7) 1 calc PR A 1 
H15B H 0.9199 0.1481 0.6670 0.176 Uiso 0.626(7) 1 calc PR A 1 
H15C H 1.0263 0.1815 0.6358 0.176 Uiso 0.626(7) 1 calc PR A 1 
C16 C 0.9851(12) 0.0218(7) 0.6621(11) 0.118(2) Uiso 0.626(7) 1 d P A 1 
H16A H 0.9947 -0.0167 0.6191 0.176 Uiso 0.626(7) 1 calc PR A 1 
H16B H 0.9046 0.0246 0.6638 0.176 Uiso 0.626(7) 1 calc PR A 1 
H16C H 1.0366 0.0188 0.7402 0.176 Uiso 0.626(7) 1 calc PR A 1 
C14A C 1.062(2) 0.0157(11) 0.638(2) 0.118(2) Uiso 0.374(7) 1 d P A 2 
H14D H 0.9989 -0.0157 0.6121 0.176 Uiso 0.374(7) 1 calc PR A 2 
H14E H 1.0941 0.0134 0.7207 0.176 Uiso 0.374(7) 1 calc PR A 2 
H14F H 1.1229 0.0058 0.6020 0.176 Uiso 0.374(7) 1 calc PR A 2 
C15A C 1.1128(19) 0.1345(12) 0.6426(19) 0.118(2) Uiso 0.374(7) 1 d P A 2 
H15D H 1.0807 0.1775 0.6187 0.176 Uiso 0.374(7) 1 calc PR A 2 
H15E H 1.1747 0.1252 0.6080 0.176 Uiso 0.374(7) 1 calc PR A 2 
H15F H 1.1443 0.1333 0.7259 0.176 Uiso 0.374(7) 1 calc PR A 2 
C16A C 0.9318(19) 0.1043(13) 0.6761(19) 0.118(2) Uiso 0.374(7) 1 d P A 2 
H16D H 0.9030 0.1481 0.6542 0.176 Uiso 0.374(7) 1 calc PR A 2 
H16E H 0.9744 0.1034 0.7574 0.176 Uiso 0.374(7) 1 calc PR A 2 
H16F H 0.8663 0.0742 0.6612 0.176 Uiso 0.374(7) 1 calc PR A 2 
C20 C 0.9425(4) 0.0424(3) 0.1761(4) 0.0613(11) Uani 1 1 d . B . 
C23 C 1.0134(6) 0.0029(4) 0.1109(7) 0.097(2) Uani 1 1 d D . . 
C24 C 0.9628(17) -0.0658(6) 0.0742(19) 0.152(3) Uiso 0.500(7) 1 d PD B 1 
H24A H 0.9534 -0.0888 0.1409 0.228 Uiso 0.500(7) 1 calc PR B 1 
H24B H 1.0158 -0.0900 0.0422 0.228 Uiso 0.500(7) 1 calc PR B 1 
H24C H 0.8873 -0.0618 0.0166 0.228 Uiso 0.500(7) 1 calc PR B 1 
C25 C 1.0327(19) 0.0428(10) 0.0098(14) 0.152(3) Uiso 0.500(7) 1 d PD B 1 
H25A H 1.0640 0.0854 0.0374 0.228 Uiso 0.500(7) 1 calc PR B 1 
H25B H 0.9586 0.0480 -0.0496 0.228 Uiso 0.500(7) 1 calc PR B 1 
H25C H 1.0875 0.0200 -0.0219 0.228 Uiso 0.500(7) 1 calc PR B 1 
C26 C 1.1432(9) 0.0026(12) 0.1859(16) 0.152(3) Uiso 0.500(7) 1 d PD B 1 
H26A H 1.1690 0.0471 0.2058 0.228 Uiso 0.500(7) 1 calc PR B 1 
H26B H 1.1913 -0.0173 0.1432 0.228 Uiso 0.500(7) 1 calc PR B 1 
H26C H 1.1504 -0.0221 0.2559 0.228 Uiso 0.500(7) 1 calc PR B 1 
C24A C 0.9297(15) -0.0103(11) -0.0110(10) 0.152(3) Uiso 0.500(7) 1 d PD B 2 
H24D H 0.8997 0.0309 -0.0473 0.228 Uiso 0.500(7) 1 calc PR B 2 
H24E H 0.8651 -0.0373 -0.0050 0.228 Uiso 0.500(7) 1 calc PR B 2 
H24F H 0.9719 -0.0326 -0.0571 0.228 Uiso 0.500(7) 1 calc PR B 2 
C25A C 1.1100(15) 0.0450(9) 0.084(2) 0.152(3) Uiso 0.500(7) 1 d PD B 2 
H25D H 1.0740 0.0808 0.0335 0.228 Uiso 0.500(7) 1 calc PR B 2 
H25E H 1.1546 0.0183 0.0457 0.228 Uiso 0.500(7) 1 calc PR B 2 
H25F H 1.1617 0.0623 0.1548 0.228 Uiso 0.500(7) 1 calc PR B 2 
C26A C 1.0740(18) -0.0539(8) 0.1899(16) 0.152(3) Uiso 0.500(7) 1 d PD B 2 
H26D H 1.1229 -0.0365 0.2622 0.228 Uiso 0.500(7) 1 calc PR B 2 
H26E H 1.1219 -0.0786 0.1524 0.228 Uiso 0.500(7) 1 calc PR B 2 
H26F H 1.0150 -0.0824 0.2046 0.228 Uiso 0.500(7) 1 calc PR B 2 
C30 C 0.5423(4) 0.0822(3) 0.3691(4) 0.0595(12) Uani 1 1 d . C . 
C33 C 0.4968(5) 0.0734(3) 0.4756(5) 0.0846(18) Uani 1 1 d D . . 
C34 C 0.5572(12) 0.0178(6) 0.5577(11) 0.120(2) Uiso 0.569(8) 1 d PD C 1 
H34A H 0.5640 -0.0204 0.5129 0.179 Uiso 0.569(8) 1 calc PR C 1 
H34B H 0.5110 0.0071 0.6089 0.179 Uiso 0.569(8) 1 calc PR C 1 
H34C H 0.6346 0.0319 0.6027 0.179 Uiso 0.569(8) 1 calc PR C 1 
C35 C 0.3720(8) 0.0449(8) 0.4200(12) 0.120(2) Uiso 0.569(8) 1 d PD C 1 
H35A H 0.3784 0.0035 0.3835 0.179 Uiso 0.569(8) 1 calc PR C 1 
H35B H 0.3267 0.0751 0.3627 0.179 Uiso 0.569(8) 1 calc PR C 1 
H35C H 0.3334 0.0383 0.4791 0.179 Uiso 0.569(8) 1 calc PR C 1 
C36 C 0.4768(15) 0.1389(5) 0.5298(13) 0.120(2) Uiso 0.569(8) 1 d PD C 1 
H36A H 0.4380 0.1693 0.4694 0.179 Uiso 0.569(8) 1 calc PR C 1 
H36B H 0.5516 0.1569 0.5739 0.179 Uiso 0.569(8) 1 calc PR C 1 
H36C H 0.4283 0.1318 0.5803 0.179 Uiso 0.569(8) 1 calc PR C 1 
C34A C 0.6092(11) 0.0756(12) 0.5800(11) 0.120(2) Uiso 0.431(8) 1 d PD C 2 
H34D H 0.6494 0.1167 0.5798 0.179 Uiso 0.431(8) 1 calc PR C 2 
H34E H 0.6604 0.0398 0.5744 0.179 Uiso 0.431(8) 1 calc PR C 2 
H34F H 0.5879 0.0717 0.6510 0.179 Uiso 0.431(8) 1 calc PR C 2 
C35A C 0.4377(17) 0.0067(6) 0.4784(19) 0.120(2) Uiso 0.431(8) 1 d PD C 2 
H35D H 0.4907 -0.0280 0.4718 0.179 Uiso 0.431(8) 1 calc PR C 2 
H35E H 0.3665 0.0040 0.4145 0.179 Uiso 0.431(8) 1 calc PR C 2 
H35F H 0.4187 0.0022 0.5504 0.179 Uiso 0.431(8) 1 calc PR C 2 
C36A C 0.4132(16) 0.1291(8) 0.4868(19) 0.120(2) Uiso 0.431(8) 1 d PD C 2 
H36D H 0.4505 0.1709 0.4842 0.179 Uiso 0.431(8) 1 calc PR C 2 
H36E H 0.3952 0.1249 0.5594 0.179 Uiso 0.431(8) 1 calc PR C 2 
H36F H 0.3414 0.1264 0.4237 0.179 Uiso 0.431(8) 1 calc PR C 2 
C40 C 0.5429(4) 0.0309(3) 0.0575(4) 0.0637(12) Uani 1 1 d . D . 
C43 C 0.4791(5) -0.0070(3) -0.0529(5) 0.0884(19) Uani 1 1 d D . . 
C44 C 0.4225(11) -0.0688(5) -0.0202(11) 0.127(2) Uiso 0.700(6) 1 d PD D 1 
H44A H 0.4810 -0.0936 0.0368 0.190 Uiso 0.700(6) 1 calc PR D 1 
H44B H 0.3910 -0.0955 -0.0883 0.190 Uiso 0.700(6) 1 calc PR D 1 
H44C H 0.3599 -0.0564 0.0115 0.190 Uiso 0.700(6) 1 calc PR D 1 
C45 C 0.3927(10) 0.0367(6) -0.1419(9) 0.127(2) Uiso 0.700(6) 1 d PD D 1 
H45A H 0.4336 0.0748 -0.1578 0.190 Uiso 0.700(6) 1 calc PR D 1 
H45B H 0.3300 0.0504 -0.1113 0.190 Uiso 0.700(6) 1 calc PR D 1 
H45C H 0.3603 0.0123 -0.2126 0.190 Uiso 0.700(6) 1 calc PR D 1 
C46 C 0.5729(9) -0.0268(7) -0.1130(11) 0.127(2) Uiso 0.700(6) 1 d PD D 1 
H46A H 0.6083 0.0121 -0.1337 0.190 Uiso 0.700(6) 1 calc PR D 1 
H46B H 0.5359 -0.0518 -0.1820 0.190 Uiso 0.700(6) 1 calc PR D 1 
H46C H 0.6327 -0.0532 -0.0608 0.190 Uiso 0.700(6) 1 calc PR D 1 
C44A C 0.518(3) -0.0785(6) -0.060(3) 0.127(2) Uiso 0.300(6) 1 d PD D 2 
H44D H 0.4703 -0.0978 -0.1318 0.190 Uiso 0.300(6) 1 calc PR D 2 
H44E H 0.5071 -0.1030 0.0043 0.190 Uiso 0.300(6) 1 calc PR D 2 
H44F H 0.5993 -0.0795 -0.0582 0.190 Uiso 0.300(6) 1 calc PR D 2 
C45A C 0.3450(8) -0.0056(16) -0.070(3) 0.127(2) Uiso 0.300(6) 1 d PD D 2 
H45D H 0.3209 0.0386 -0.0591 0.190 Uiso 0.300(6) 1 calc PR D 2 
H45E H 0.3266 -0.0342 -0.0136 0.190 Uiso 0.300(6) 1 calc PR D 2 
H45F H 0.3039 -0.0205 -0.1468 0.190 Uiso 0.300(6) 1 calc PR D 2 
C46A C 0.469(3) 0.0354(13) -0.1614(17) 0.127(2) Uiso 0.300(6) 1 d PD D 2 
H46D H 0.4386 0.0781 -0.1510 0.190 Uiso 0.300(6) 1 calc PR D 2 
H46E H 0.4163 0.0144 -0.2283 0.190 Uiso 0.300(6) 1 calc PR D 2 
H46F H 0.5456 0.0401 -0.1727 0.190 Uiso 0.300(6) 1 calc PR D 2 
C50 C 0.7246(4) 0.2189(2) 0.0233(4) 0.0538(10) Uani 1 1 d . E . 
C53 C 0.7315(4) 0.2382(3) -0.0965(4) 0.0729(15) Uani 1 1 d D . . 
C54 C 0.7762(13) 0.1759(5) -0.1421(12) 0.117(2) Uiso 0.514(6) 1 d PD E 1 
H54A H 0.7210 0.1406 -0.1461 0.176 Uiso 0.514(6) 1 calc PR E 1 
H54B H 0.8518 0.1637 -0.0903 0.176 Uiso 0.514(6) 1 calc PR E 1 
H54C H 0.7837 0.1842 -0.2183 0.176 Uiso 0.514(6) 1 calc PR E 1 
C55 C 0.8163(12) 0.2961(6) -0.0884(14) 0.117(2) Uiso 0.514(6) 1 d PD E 1 
H55A H 0.8925 0.2848 -0.0369 0.176 Uiso 0.514(6) 1 calc PR E 1 
H55B H 0.7862 0.3342 -0.0589 0.176 Uiso 0.514(6) 1 calc PR E 1 
H55C H 0.8235 0.3057 -0.1643 0.176 Uiso 0.514(6) 1 calc PR E 1 
C56 C 0.6110(8) 0.2571(9) -0.1788(12) 0.117(2) Uiso 0.514(6) 1 d PD E 1 
H56A H 0.5569 0.2211 -0.1848 0.176 Uiso 0.514(6) 1 calc PR E 1 
H56B H 0.6189 0.2669 -0.2544 0.176 Uiso 0.514(6) 1 calc PR E 1 
H56C H 0.5815 0.2953 -0.1490 0.176 Uiso 0.514(6) 1 calc PR E 1 
C54A C 0.8571(8) 0.2407(10) -0.1074(15) 0.117(2) Uiso 0.486(6) 1 d PD E 2 
H54D H 0.9061 0.2670 -0.0455 0.176 Uiso 0.486(6) 1 calc PR E 2 
H54E H 0.8555 0.2598 -0.1809 0.176 Uiso 0.486(6) 1 calc PR E 2 
H54F H 0.8885 0.1967 -0.1026 0.176 Uiso 0.486(6) 1 calc PR E 2 
C55A C 0.6836(15) 0.3089(5) -0.1208(15) 0.117(2) Uiso 0.486(6) 1 d PD E 2 
H55D H 0.7324 0.3384 -0.0643 0.176 Uiso 0.486(6) 1 calc PR E 2 
H55E H 0.6040 0.3105 -0.1159 0.176 Uiso 0.486(6) 1 calc PR E 2 
H55F H 0.6844 0.3220 -0.1974 0.176 Uiso 0.486(6) 1 calc PR E 2 
C56A C 0.6426(12) 0.1994(8) -0.1910(11) 0.117(2) Uiso 0.486(6) 1 d PD E 2 
H56D H 0.5667 0.2008 -0.1772 0.176 Uiso 0.486(6) 1 calc PR E 2 
H56E H 0.6684 0.1545 -0.1899 0.176 Uiso 0.486(6) 1 calc PR E 2 
H56F H 0.6367 0.2186 -0.2656 0.176 Uiso 0.486(6) 1 calc PR E 2 
C60 C 0.7143(4) 0.2694(2) 0.3393(4) 0.0511(10) Uani 1 1 d . . . 
C63 C 0.7025(4) 0.3209(3) 0.4286(4) 0.0596(12) Uani 1 1 d . . . 
C64 C 0.7644(8) 0.2935(5) 0.5501(8) 0.132(3) Uiso 1 1 d . . . 
H64A H 0.7255 0.2537 0.5624 0.198 Uiso 1 1 calc R . . 
H64B H 0.7610 0.3255 0.6079 0.198 Uiso 1 1 calc R . . 
H64C H 0.8456 0.2840 0.5562 0.198 Uiso 1 1 calc R . . 
C65 C 0.7633(7) 0.3825(5) 0.4112(8) 0.127(3) Uiso 1 1 d . . . 
H65A H 0.8442 0.3729 0.4164 0.191 Uiso 1 1 calc R . . 
H65B H 0.7607 0.4140 0.4701 0.191 Uiso 1 1 calc R . . 
H65C H 0.7244 0.4005 0.3358 0.191 Uiso 1 1 calc R . . 
C66 C 0.5753(7) 0.3334(5) 0.4213(8) 0.126(3) Uiso 1 1 d . . . 
H66A H 0.5387 0.2928 0.4331 0.188 Uiso 1 1 calc R . . 
H66B H 0.5347 0.3509 0.3460 0.188 Uiso 1 1 calc R . . 
H66C H 0.5713 0.3645 0.4803 0.188 Uiso 1 1 calc R . . 
C102 C 1.1407(5) 0.2136(4) 0.3001(6) 0.0914(19) Uani 1 1 d . . . 
H10A H 1.1515 0.1688 0.3166 0.110 Uiso 1 1 calc R . . 
C103 C 1.2400(6) 0.2517(5) 0.3004(8) 0.117(3) Uani 1 1 d . . . 
H10B H 1.3146 0.2328 0.3153 0.141 Uiso 1 1 calc R . . 
C104 C 1.2230(7) 0.3170(5) 0.2782(8) 0.130(3) Uani 1 1 d . . . 
H10C H 1.2871 0.3436 0.2782 0.156 Uiso 1 1 calc R . . 
C105 C 1.1117(7) 0.3447(4) 0.2554(7) 0.110(2) Uani 1 1 d . . . 
H10D H 1.0989 0.3896 0.2408 0.132 Uiso 1 1 calc R . . 
C106 C 1.0196(5) 0.3018(3) 0.2556(6) 0.0823(17) Uani 1 1 d . . . 
H10E H 0.9437 0.3191 0.2391 0.099 Uiso 1 1 calc R . . 
C202 C 0.6525(6) -0.1069(3) 0.3241(6) 0.0899(19) Uani 1 1 d . . . 
H20A H 0.5799 -0.0863 0.2927 0.108 Uiso 1 1 calc R . . 
C203 C 0.6525(8) -0.1721(4) 0.3592(8) 0.116(3) Uani 1 1 d . . . 
H20B H 0.5822 -0.1945 0.3527 0.139 Uiso 1 1 calc R . . 
C204 C 0.7609(9) -0.2026(4) 0.4041(8) 0.124(3) Uani 1 1 d . . . 
H20C H 0.7644 -0.2462 0.4290 0.148 Uiso 1 1 calc R . . 
C205 C 0.8604(7) -0.1698(4) 0.4118(8) 0.113(3) Uani 1 1 d . . . 
H20D H 0.9334 -0.1906 0.4391 0.135 Uiso 1 1 calc R . . 
C206 C 0.8533(6) -0.1033(3) 0.3782(6) 0.0864(18) Uani 1 1 d . . . 
H20E H 0.9230 -0.0798 0.3878 0.104 Uiso 1 1 calc R . . 
C302 C 0.3984(5) 0.2697(4) 0.0369(7) 0.099(2) Uani 1 1 d . . . 
H30A H 0.4680 0.2938 0.0501 0.119 Uiso 1 1 calc R . . 
C303 C 0.2947(7) 0.2978(5) -0.0327(8) 0.130(3) Uani 1 1 d . . . 
H30B H 0.2953 0.3389 -0.0669 0.157 Uiso 1 1 calc R . . 
C304 C 0.1941(7) 0.2641(5) -0.0492(8) 0.124(3) Uani 1 1 d . . . 
H30C H 0.1230 0.2822 -0.0937 0.148 Uiso 1 1 calc R . . 
C305 C 0.1961(6) 0.2044(5) -0.0014(10) 0.146(4) Uani 1 1 d . . . 
H30D H 0.1267 0.1804 -0.0126 0.175 Uiso 1 1 calc R . . 
C306 C 0.3043(5) 0.1787(4) 0.0658(7) 0.106(2) Uani 1 1 d . . . 
H30E H 0.3054 0.1368 0.0979 0.127 Uiso 1 1 calc R . . 
 
loop_ 
 _atom_site_aniso_label 
 _atom_site_aniso_U_11 
 _atom_site_aniso_U_22 
 _atom_site_aniso_U_33 
 _atom_site_aniso_U_23 
 _atom_site_aniso_U_13 
 _atom_site_aniso_U_12 
Fe1 0.0621(3) 0.0513(4) 0.0462(3) 0.0032(3) 0.0156(2) 0.0043(3) 
Fe2 0.0588(3) 0.0503(4) 0.0513(3) 0.0012(3) 0.0129(2) -0.0009(3) 
Fe3 0.0632(4) 0.0520(4) 0.0478(3) -0.0006(3) 0.0153(2) -0.0043(3) 
O1 0.0463(15) 0.0464(18) 0.0479(15) -0.0002(13) 0.0120(12) -0.0025(12) 
O11 0.069(2) 0.072(3) 0.064(2) 0.0244(18) 0.0031(16) -0.0101(17) 
O12 0.078(2) 0.063(2) 0.0579(18) 0.0069(17) -0.0027(15) -0.0124(18) 
O22 0.080(2) 0.059(2) 0.103(3) 0.001(2) 0.046(2) 0.0056(18) 
O21 0.075(2) 0.066(3) 0.099(3) -0.009(2) 0.038(2) -0.005(2) 
O31 0.082(2) 0.060(2) 0.084(2) 0.013(2) 0.0432(18) 0.004(2) 
O32 0.073(2) 0.073(3) 0.082(2) 0.028(2) 0.0303(18) 0.0092(18) 
O41 0.078(2) 0.058(2) 0.065(2) -0.0074(17) 0.0000(17) 0.0010(17) 
O42 0.073(2) 0.067(3) 0.086(3) -0.021(2) -0.0078(18) 0.012(2) 
O51 0.059(2) 0.106(3) 0.0572(18) 0.0229(19) 0.0204(15) 0.0046(19) 
O52 0.062(2) 0.091(3) 0.0559(18) 0.0209(19) 0.0062(15) -0.0134(18) 
O61 0.064(2) 0.064(2) 0.073(2) -0.0160(19) 0.0037(16) 0.0042(17) 
O62 0.0575(19) 0.067(2) 0.082(2) -0.0198(19) 0.0242(17) -0.0045(17) 
N101 0.057(2) 0.066(3) 0.063(2) 0.001(2) 0.0144(18) -0.002(2) 
N201 0.075(3) 0.053(3) 0.067(3) 0.007(2) 0.009(2) -0.002(2) 
N301 0.056(2) 0.062(3) 0.073(3) 0.001(2) 0.0177(19) -0.004(2) 
C10 0.058(2) 0.053(3) 0.049(2) 0.003(2) 0.0103(19) 0.008(2) 
C13 0.068(3) 0.065(3) 0.056(3) 0.009(3) -0.002(2) 0.002(3) 
C20 0.069(3) 0.056(3) 0.059(3) -0.005(2) 0.020(2) 0.004(3) 
C23 0.100(5) 0.093(5) 0.116(5) -0.005(4) 0.057(4) -0.008(4) 
C30 0.055(2) 0.066(3) 0.058(3) 0.004(2) 0.017(2) -0.012(2) 
C33 0.087(4) 0.086(5) 0.098(4) 0.023(4) 0.052(3) 0.003(3) 
C40 0.065(3) 0.061(3) 0.056(2) -0.001(3) 0.005(2) 0.000(3) 
C43 0.095(4) 0.076(4) 0.073(4) -0.020(3) -0.010(3) 0.005(3) 
C50 0.061(3) 0.054(3) 0.047(2) 0.005(2) 0.0171(19) 0.005(2) 
C53 0.074(3) 0.097(5) 0.051(3) 0.019(3) 0.023(2) 0.008(3) 
C60 0.061(3) 0.044(3) 0.050(2) 0.0037(19) 0.0184(19) -0.003(2) 
C63 0.069(3) 0.050(3) 0.062(3) -0.008(2) 0.024(2) 0.000(2) 
C102 0.069(4) 0.094(5) 0.107(5) 0.006(4) 0.020(3) 0.001(3) 
C103 0.070(4) 0.124(8) 0.155(8) 0.004(6) 0.029(4) -0.019(5) 
C104 0.092(5) 0.132(9) 0.155(8) 0.026(7) 0.019(5) -0.037(5) 
C105 0.098(5) 0.091(6) 0.141(7) 0.005(5) 0.036(5) -0.026(4) 
C106 0.076(4) 0.073(4) 0.098(4) 0.011(3) 0.025(3) -0.004(3) 
C202 0.092(4) 0.067(4) 0.102(5) 0.005(4) 0.015(3) -0.020(3) 
C203 0.129(6) 0.063(5) 0.154(8) 0.010(5) 0.039(6) -0.019(4) 
C204 0.175(9) 0.057(4) 0.148(8) 0.016(5) 0.061(7) 0.000(5) 
C205 0.111(6) 0.067(5) 0.152(7) 0.014(5) 0.026(5) 0.015(4) 
C206 0.087(4) 0.066(4) 0.102(5) 0.008(3) 0.021(3) 0.011(3) 
C302 0.067(4) 0.084(5) 0.146(6) 0.034(5) 0.029(4) 0.005(3) 
C303 0.092(5) 0.114(7) 0.168(8) 0.054(6) 0.011(5) 0.029(5) 
C304 0.078(5) 0.097(6) 0.167(8) 0.016(6) -0.010(5) 0.010(4) 
C305 0.062(4) 0.120(8) 0.231(11) 0.015(7) 0.007(5) -0.009(4) 
C306 0.067(3) 0.092(5) 0.150(6) 0.014(5) 0.018(4) 0.001(4) 
 
_geom_special_details 
; 
 All esds (except the esd in the dihedral angle between two l.s. planes) 
 are estimated using the full covariance matrix.  The cell esds are taken 
 into account individually in the estimation of esds in distances, angles 
 and torsion angles; correlations between esds in cell parameters are only 
 used when they are defined by crystal symmetry.  An approximate (isotropic) 
 treatment of cell esds is used for estimating esds involving l.s. planes. 
; 
 
loop_ 
 _geom_bond_atom_site_label_1 
 _geom_bond_atom_site_label_2 
 _geom_bond_distance 
 _geom_bond_site_symmetry_2 
 _geom_bond_publ_flag 
Fe1 O1 1.914(3) . ? 
Fe1 O52 2.030(3) . ? 
Fe1 O11 2.045(3) . ? 
Fe1 O62 2.067(3) . ? 
Fe1 O21 2.097(4) . ? 
Fe1 N101 2.247(4) . ? 
Fe1 Fe2 3.2719(11) . ? 
Fe1 Fe3 3.3422(10) . ? 
Fe2 O1 1.855(3) . ? 
Fe2 O31 2.012(3) . ? 
Fe2 O22 2.015(4) . ? 
Fe2 O12 2.047(3) . ? 
Fe2 O41 2.051(3) . ? 
Fe2 N201 2.256(5) . ? 
Fe2 Fe3 3.2933(11) . ? 
Fe3 O1 1.951(3) . ? 
Fe3 O61 2.039(4) . ? 
Fe3 O42 2.047(4) . ? 
Fe3 O51 2.071(3) . ? 
Fe3 O32 2.104(3) . ? 
Fe3 N301 2.230(4) . ? 
O11 C10 1.240(6) . ? 
O12 C10 1.252(6) . ? 
O22 C20 1.232(6) . ? 
O21 C20 1.244(6) . ? 
O31 C30 1.239(6) . ? 
O32 C30 1.237(6) . ? 
O41 C40 1.261(6) . ? 
O42 C40 1.220(7) . ? 
O51 C50 1.241(5) . ? 
O52 C50 1.253(5) . ? 
O61 C60 1.253(5) . ? 
O62 C60 1.240(5) . ? 
N101 C102 1.307(7) . ? 
N101 C106 1.326(8) . ? 
N201 C202 1.321(7) . ? 
N201 C206 1.346(7) . ? 
N301 C302 1.314(8) . ? 
N301 C306 1.315(7) . ? 
C10 C13 1.519(6) . ? 
C13 C14A 1.49(2) . ? 
C13 C15 1.494(14) . ? 
C13 C15A 1.52(2) . ? 
C13 C16 1.526(14) . ? 
C13 C14 1.541(12) . ? 
C13 C16A 1.56(2) . ? 
C20 C23 1.530(8) . ? 
C23 C24 1.528(5) . ? 
C23 C26A 1.530(5) . ? 
C23 C25 1.531(5) . ? 
C23 C24A 1.532(5) . ? 
C23 C25A 1.535(5) . ? 
C23 C26 1.536(5) . ? 
C30 C33 1.537(7) . ? 
C33 C35A 1.527(5) . ? 
C33 C36 1.527(5) . ? 
C33 C34 1.530(5) . ? 
C33 C36A 1.532(5) . ? 
C33 C34A 1.539(5) . ? 
C33 C35 1.543(5) . ? 
C40 C43 1.528(7) . ? 
C43 C44 1.526(5) . ? 
C43 C45 1.527(5) . ? 
C43 C44A 1.530(5) . ? 
C43 C46A 1.536(5) . ? 
C43 C45A 1.539(5) . ? 
C43 C46 1.543(5) . ? 
C50 C53 1.517(6) . ? 
C53 C56A 1.521(5) . ? 
C53 C56 1.526(5) . ? 
C53 C55 1.528(5) . ? 
C53 C54A 1.529(5) . ? 
C53 C54 1.532(5) . ? 
C53 C55A 1.537(5) . ? 
C60 C63 1.531(6) . ? 
C63 C65 1.486(9) . ? 
C63 C66 1.502(9) . ? 
C63 C64 1.533(10) . ? 
C102 C103 1.405(9) . ? 
C103 C104 1.353(12) . ? 
C104 C105 1.383(11) . ? 
C105 C106 1.394(9) . ? 
C202 C203 1.388(9) . ? 
C203 C204 1.383(11) . ? 
C204 C205 1.330(11) . ? 
C205 C206 1.402(9) . ? 
C302 C303 1.389(9) . ? 
C303 C304 1.334(11) . ? 
C304 C305 1.337(11) . ? 
C305 C306 1.398(10) . ? 
 
loop_ 
 _geom_angle_atom_site_label_1 
 _geom_angle_atom_site_label_2 
 _geom_angle_atom_site_label_3 
 _geom_angle 
 _geom_angle_site_symmetry_1 
 _geom_angle_site_symmetry_3 
 _geom_angle_publ_flag 
O1 Fe1 O52 95.29(13) . . ? 
O1 Fe1 O11 96.65(13) . . ? 
O52 Fe1 O11 167.87(14) . . ? 
O1 Fe1 O62 93.81(13) . . ? 
O52 Fe1 O62 93.16(16) . . ? 
O11 Fe1 O62 88.21(16) . . ? 
O1 Fe1 O21 94.37(14) . . ? 
O52 Fe1 O21 88.06(17) . . ? 
O11 Fe1 O21 88.88(17) . . ? 
O62 Fe1 O21 171.58(14) . . ? 
O1 Fe1 N101 176.62(15) . . ? 
O52 Fe1 N101 81.52(15) . . ? 
O11 Fe1 N101 86.59(15) . . ? 
O62 Fe1 N101 85.29(15) . . ? 
O21 Fe1 N101 86.66(15) . . ? 
O1 Fe1 Fe2 29.25(9) . . ? 
O52 Fe1 Fe2 115.24(11) . . ? 
O11 Fe1 Fe2 75.11(10) . . ? 
O62 Fe1 Fe2 112.26(10) . . ? 
O21 Fe1 Fe2 74.54(11) . . ? 
N101 Fe1 Fe2 153.76(12) . . ? 
O1 Fe1 Fe3 30.46(9) . . ? 
O52 Fe1 Fe3 73.69(9) . . ? 
O11 Fe1 Fe3 118.18(10) . . ? 
O62 Fe1 Fe3 74.10(9) . . ? 
O21 Fe1 Fe3 114.19(11) . . ? 
N101 Fe1 Fe3 146.46(12) . . ? 
Fe2 Fe1 Fe3 59.71(2) . . ? 
O1 Fe2 O31 95.51(14) . . ? 
O1 Fe2 O22 97.23(14) . . ? 
O31 Fe2 O22 167.25(17) . . ? 
O1 Fe2 O12 95.52(14) . . ? 
O31 Fe2 O12 89.91(15) . . ? 
O22 Fe2 O12 89.14(17) . . ? 
O1 Fe2 O41 97.13(14) . . ? 
O31 Fe2 O41 91.04(16) . . ? 
O22 Fe2 O41 87.12(17) . . ? 
O12 Fe2 O41 167.17(16) . . ? 
O1 Fe2 N201 178.71(16) . . ? 
O31 Fe2 N201 83.30(17) . . ? 
O22 Fe2 N201 83.96(16) . . ? 
O12 Fe2 N201 84.00(15) . . ? 
O41 Fe2 N201 83.41(15) . . ? 
O1 Fe2 Fe1 30.29(8) . . ? 
O31 Fe2 Fe1 116.75(12) . . ? 
O22 Fe2 Fe1 75.20(11) . . ? 
O12 Fe2 Fe1 74.79(10) . . ? 
O41 Fe2 Fe1 115.93(11) . . ? 
N201 Fe2 Fe1 150.22(12) . . ? 
O1 Fe2 Fe3 30.91(8) . . ? 
O31 Fe2 Fe3 73.13(11) . . ? 
O22 Fe2 Fe3 118.54(12) . . ? 
O12 Fe2 Fe3 115.82(11) . . ? 
O41 Fe2 Fe3 76.63(11) . . ? 
N201 Fe2 Fe3 148.54(12) . . ? 
Fe1 Fe2 Fe3 61.21(2) . . ? 
O1 Fe3 O61 95.51(13) . . ? 
O1 Fe3 O42 94.40(14) . . ? 
O61 Fe3 O42 169.90(14) . . ? 
O1 Fe3 O51 92.93(13) . . ? 
O61 Fe3 O51 92.65(17) . . ? 
O42 Fe3 O51 88.77(17) . . ? 
O1 Fe3 O32 94.07(13) . . ? 
O61 Fe3 O32 86.65(16) . . ? 
O42 Fe3 O32 90.73(18) . . ? 
O51 Fe3 O32 173.00(14) . . ? 
O1 Fe3 N301 175.83(15) . . ? 
O61 Fe3 N301 87.07(15) . . ? 
O42 Fe3 N301 83.15(15) . . ? 
O51 Fe3 N301 83.66(15) . . ? 
O32 Fe3 N301 89.35(15) . . ? 
O1 Fe3 Fe2 29.24(9) . . ? 
O61 Fe3 Fe2 116.32(10) . . ? 
O42 Fe3 Fe2 72.30(11) . . ? 
O51 Fe3 Fe2 110.73(11) . . ? 
O32 Fe3 Fe2 75.71(10) . . ? 
N301 Fe3 Fe2 150.80(12) . . ? 
O1 Fe3 Fe1 29.84(9) . . ? 
O61 Fe3 Fe1 73.64(10) . . ? 
O42 Fe3 Fe1 116.31(11) . . ? 
O51 Fe3 Fe1 74.19(9) . . ? 
O32 Fe3 Fe1 112.19(11) . . ? 
N301 Fe3 Fe1 149.57(12) . . ? 
Fe2 Fe3 Fe1 59.08(2) . . ? 
Fe2 O1 Fe1 120.46(15) . . ? 
Fe2 O1 Fe3 119.84(15) . . ? 
Fe1 O1 Fe3 119.70(16) . . ? 
C10 O11 Fe1 131.8(3) . . ? 
C10 O12 Fe2 132.2(3) . . ? 
C20 O22 Fe2 133.3(4) . . ? 
C20 O21 Fe1 130.3(3) . . ? 
C30 O31 Fe2 134.2(4) . . ? 
C30 O32 Fe3 127.4(3) . . ? 
C40 O41 Fe2 128.0(4) . . ? 
C40 O42 Fe3 134.4(3) . . ? 
C50 O51 Fe3 131.4(3) . . ? 
C50 O52 Fe1 132.8(3) . . ? 
C60 O61 Fe3 131.9(3) . . ? 
C60 O62 Fe1 131.7(3) . . ? 
C102 N101 C106 117.8(5) . . ? 
C102 N101 Fe1 122.7(4) . . ? 
C106 N101 Fe1 119.3(4) . . ? 
C202 N201 C206 116.8(6) . . ? 
C202 N201 Fe2 121.6(4) . . ? 
C206 N201 Fe2 121.6(4) . . ? 
C302 N301 C306 116.3(5) . . ? 
C302 N301 Fe3 120.7(4) . . ? 
C306 N301 Fe3 122.4(4) . . ? 
O11 C10 O12 125.5(4) . . ? 
O11 C10 C13 117.5(4) . . ? 
O12 C10 C13 117.1(4) . . ? 
C14A C13 C15 134.0(11) . . ? 
C14A C13 C15A 111.3(13) . . ? 
C15 C13 C15A 57.9(9) . . ? 
C14A C13 C10 114.9(10) . . ? 
C15 C13 C10 109.2(6) . . ? 
C15A C13 C10 114.4(9) . . ? 
C14A C13 C16 40.5(9) . . ? 
C15 C13 C16 109.9(8) . . ? 
C15A C13 C16 132.6(10) . . ? 
C10 C13 C16 112.7(6) . . ? 
C14A C13 C14 72.4(10) . . ? 
C15 C13 C14 106.5(8) . . ? 
C15A C13 C14 49.2(9) . . ? 
C10 C13 C14 107.2(6) . . ? 
C16 C13 C14 111.1(8) . . ? 
C14A C13 C16A 109.9(13) . . ? 
C15 C13 C16A 44.6(9) . . ? 
C15A C13 C16A 100.7(12) . . ? 
C10 C13 C16A 104.3(9) . . ? 
C16 C13 C16A 71.9(10) . . ? 
C14 C13 C16A 143.6(10) . . ? 
O22 C20 O21 125.8(5) . . ? 
O22 C20 C23 115.5(5) . . ? 
O21 C20 C23 118.7(5) . . ? 
C24 C23 C26A 64.3(11) . . ? 
C24 C23 C20 113.4(9) . . ? 
C26A C23 C20 107.7(9) . . ? 
C24 C23 C25 112.9(13) . . ? 
C26A C23 C25 137.6(12) . . ? 
C20 C23 C25 111.1(10) . . ? 
C24 C23 C24A 58.5(11) . . ? 
C26A C23 C24A 121.1(13) . . ? 
C20 C23 C24A 106.4(9) . . ? 
C25 C23 C24A 62.5(11) . . ? 
C24 C23 C25A 134.3(12) . . ? 
C26A C23 C25A 107.9(12) . . ? 
C20 C23 C25A 111.7(9) . . ? 
C25 C23 C25A 41.0(9) . . ? 
C24A C23 C25A 101.9(12) . . ? 
C24 C23 C26 114.0(13) . . ? 
C26A C23 C26 55.1(10) . . ? 
C20 C23 C26 107.7(10) . . ? 
C25 C23 C26 96.5(11) . . ? 
C24A C23 C26 144.7(12) . . ? 
C25A C23 C26 56.6(10) . . ? 
O32 C30 O31 126.1(5) . . ? 
O32 C30 C33 118.8(5) . . ? 
O31 C30 C33 115.1(5) . . ? 
C35A C33 C36 129.2(10) . . ? 
C35A C33 C34 57.6(9) . . ? 
C36 C33 C34 117.8(9) . . ? 
C35A C33 C36A 109.9(11) . . ? 
C36 C33 C36A 30.5(9) . . ? 
C34 C33 C36A 132.7(11) . . ? 
C35A C33 C30 113.2(9) . . ? 
C36 C33 C30 113.0(7) . . ? 
C34 C33 C30 114.2(7) . . ? 
C36A C33 C30 112.3(9) . . ? 
C35A C33 C34A 107.4(12) . . ? 
C36 C33 C34A 80.3(10) . . ? 
C34 C33 C34A 50.7(9) . . ? 
C36A C33 C34A 109.5(12) . . ? 
C30 C33 C34A 104.2(8) . . ? 
C35A C33 C35 44.9(8) . . ? 
C36 C33 C35 105.3(9) . . ? 
C34 C33 C35 102.1(9) . . ? 
C36A C33 C35 75.8(10) . . ? 
C30 C33 C35 101.9(7) . . ? 
C34A C33 C35 148.5(11) . . ? 
O42 C40 O41 126.1(5) . . ? 
O42 C40 C43 118.5(5) . . ? 
O41 C40 C43 115.4(5) . . ? 
C44 C43 C45 113.8(8) . . ? 
C44 C43 C40 109.4(7) . . ? 
C45 C43 C40 112.1(7) . . ? 
C44 C43 C44A 52.9(11) . . ? 
C45 C43 C44A 131.1(13) . . ? 
C40 C43 C44A 116.6(12) . . ? 
C44 C43 C46A 138.3(13) . . ? 
C45 C43 C46A 37.9(10) . . ? 
C40 C43 C46A 110.6(13) . . ? 
C44A C43 C46A 115.5(17) . . ? 
C44 C43 C45A 62.4(13) . . ? 
C45 C43 C45A 56.3(12) . . ? 
C40 C43 C45A 109.5(12) . . ? 
C44A C43 C45A 108.8(17) . . ? 
C46A C43 C45A 93.2(15) . . ? 
C44 C43 C46 109.6(8) . . ? 
C45 C43 C46 104.4(8) . . ? 
C40 C43 C46 107.3(6) . . ? 
C44A C43 C46 57.2(12) . . ? 
C46A C43 C46 68.7(12) . . ? 
C45A C43 C46 142.8(13) . . ? 
O51 C50 O52 125.7(4) . . ? 
O51 C50 C53 118.3(4) . . ? 
O52 C50 C53 116.0(4) . . ? 
C50 C53 C56A 110.9(8) . . ? 
C50 C53 C56 112.3(7) . . ? 
C56A C53 C56 48.4(8) . . ? 
C50 C53 C55 110.7(7) . . ? 
C56A C53 C55 137.9(10) . . ? 
C56 C53 C55 108.6(10) . . ? 
C50 C53 C54A 114.3(7) . . ? 
C56A C53 C54A 115.4(10) . . ? 
C56 C53 C54A 133.1(9) . . ? 
C55 C53 C54A 49.1(8) . . ? 
C50 C53 C54 104.2(7) . . ? 
C56A C53 C54 62.7(8) . . ? 
C56 C53 C54 109.3(9) . . ? 
C55 C53 C54 111.6(9) . . ? 
C54A C53 C54 63.3(9) . . ? 
C50 C53 C55A 107.6(7) . . ? 
C56A C53 C55A 101.8(10) . . ? 
C56 C53 C55A 54.6(8) . . ? 
C55 C53 C55A 59.7(9) . . ? 
C54A C53 C55A 105.5(10) . . ? 
C54 C53 C55A 148.0(9) . . ? 
O62 C60 O61 125.4(4) . . ? 
O62 C60 C63 117.6(4) . . ? 
O61 C60 C63 116.9(4) . . ? 
C65 C63 C66 111.5(6) . . ? 
C65 C63 C60 109.1(5) . . ? 
C66 C63 C60 111.6(5) . . ? 
C65 C63 C64 108.8(6) . . ? 
C66 C63 C64 107.9(6) . . ? 
C60 C63 C64 107.7(5) . . ? 
N101 C102 C103 123.5(7) . . ? 
C104 C103 C102 117.5(8) . . ? 
C103 C104 C105 120.9(7) . . ? 
C104 C105 C106 116.4(8) . . ? 
N101 C106 C105 123.9(6) . . ? 
N201 C202 C203 124.0(7) . . ? 
C204 C203 C202 117.5(7) . . ? 
C205 C204 C203 120.3(8) . . ? 
C204 C205 C206 118.8(7) . . ? 
N201 C206 C205 122.5(6) . . ? 
N301 C302 C303 124.1(7) . . ? 
C304 C303 C302 118.2(8) . . ? 
C303 C304 C305 119.7(7) . . ? 
C304 C305 C306 119.0(7) . . ? 
N301 C306 C305 122.7(8) . . ? 
 
_diffrn_measured_fraction_theta_max    0.891 
_diffrn_reflns_theta_full              29.27 
_diffrn_measured_fraction_theta_full   0.891 
_refine_diff_density_max    0.417 
_refine_diff_density_min   -0.329 
_refine_diff_density_rms    0.055 

#===END
